# Supplementary material
Source: publisher figshare collection journal article supplement (https://springernature.figshare.com/articles/dataset/_/28397993)
Supplement: Supplementary file 1 [file 1]

## Sheet: fig3a
7.1 GPa		12.6 GPa		18.9 GPa		25.3 GPa		33.8 GPa		42.3 GPa		50.6 GPa		62.7 GPa GPa		72.1 GPa
T(K)	R(Ohm)	T(K)	R(Ohm)	T(K)	R(Ohm)	T(K)	R(Ohm)	T(K)	R(Ohm)	T(K)	R(Ohm)	T(K)	R(Ohm)	T(K)	R(Ohm)	T(K)	R(Ohm)
300.789	2.85691	300.281	2.43337	300.398	1.50806	301.56	0.59094	1.6323	0.11105	1.63	0.04982	1.6774	0.01804	301.45	0.18698	300.2	0.13368
299.192	2.85462	298.511	2.42981	296.326	1.49733	301.536	0.58865	1.94023	0.11977	1.94023	0.05349	1.98554	0.01932	301.141	0.18694	299.893	0.13364
297.356	2.85191	296.045	2.42247	293.523	1.49054	301.531	0.58969	2.24815	0.13208	2.25045	0.05834	2.29368	0.0206	300.833	0.18691	299.586	0.13359
295.28	2.84888	293.229	2.41552	291.402	1.4866	301.517	0.58924	2.55608	0.14644	2.56068	0.06319	2.60182	0.02187	300.525	0.18687	299.278	0.13355
291.607	2.84255	289.908	2.40584	287.769	1.47814	301.481	0.5893	2.864	0.16018	2.8709	0.06814	2.90995	0.02346	300.216	0.18684	298.971	0.13352
288.633	2.83792	286.222	2.39251	285.794	1.4747	297.806	0.58937	3.17193	0.17454	3.18113	0.0723	3.21809	0.02506	299.908	0.1868	298.664	0.1335
284.96	2.83058	283.397	2.38127	284.112	1.47076	294.342	0.58805	3.47985	0.18962	3.49135	0.07804	3.52623	0.02667	299.599	0.18677	298.357	0.13347
281.789	2.82593	280.934	2.37083	282.385	1.46686	291.803	0.58598	3.78778	0.20429	3.80158	0.08369	3.83437	0.02787	299.291	0.18673	298.05	0.13343
279.123	2.82191	278.639	2.36362	280.722	1.46267	289.524	0.58456	4.0957	0.21742	4.1118	0.08933	4.14251	0.02988	298.983	0.18669	297.742	0.1334
276.828	2.81856	277.018	2.35856	279.514	1.45921	287.736	0.58271	4.40363	0.23189	4.42203	0.09527	4.45065	0.0319	298.674	0.18665	297.435	0.13336
274.652	2.8159	275.468	2.3549	278.239	1.45775	286.03	0.58034	4.71155	0.24184	4.73225	0.10151	4.75878	0.03438	298.366	0.18661	297.128	0.13333
272.863	2.81334	273.563	2.34801	277.219	1.45536	284.432	0.57929	5.01948	0.25168	5.04248	0.10774	5.06692	0.03687	298.057	0.18656	296.821	0.1333
271.038	2.81095	272.581	2.34514	276.066	1.45334	282.943	0.57823	5.3274	0.26143	5.3527	0.11398	5.37506	0.03858	297.749	0.18652	296.514	0.13327
269.451	2.80866	271.309	2.3415	275.047	1.45243	281.582	0.57716	5.63533	0.27065	5.66293	0.12032	5.6832	0.04148	297.441	0.18647	296.206	0.13324
268.015	2.80696	269.743	2.33728	274.16	1.45024	280.236	0.57651	5.94325	0.27823	5.97315	0.12695	5.99134	0.0445	297.132	0.18642	295.899	0.1332
266.738	2.80563	268.66	2.33262	273.262	1.44772	279.04	0.57608	6.25118	0.28582	6.28338	0.13369	6.29948	0.04752	296.824	0.18637	295.592	0.13317
265.553	2.80451	267.725	2.32916	272.242	1.44439	277.992	0.57559	6.5591	0.29175	6.5936	0.14032	6.60762	0.05083	296.515	0.18631	295.285	0.13314
264.38	2.80255	266.676	2.32734	271.475	1.44325	276.938	0.57489	6.86703	0.29737	6.90383	0.14695	6.91575	0.05421	296.207	0.18626	294.978	0.1331
263.422	2.80186	265.6	2.32368	270.646	1.4416	276.007	0.57432	7.17495	0.30299	7.21406	0.15279	7.22389	0.05758	295.899	0.1862	294.671	0.13306
262.393	2.80068	264.78	2.32001	269.881	1.44089	275.05	0.57352	7.48288	0.30704	7.52428	0.15992	7.53203	0.06095	295.59	0.18615	294.363	0.13303
261.458	2.79957	264.075	2.3149	269.118	1.43867	274.124	0.57285	7.7908	0.31072	7.83451	0.16576	7.84017	0.06515	295.282	0.1861	294.056	0.13299
260.623	2.79845	263.291	2.3117	268.485	1.43705	273.232	0.57234	8.09873	0.3144	8.14473	0.17299	8.14831	0.06859	294.973	0.18606	293.749	0.13295
259.736	2.79712	262.482	2.31026	267.892	1.43553	272.458	0.57165	8.40665	0.31723	8.45496	0.17844	8.45645	0.07149	294.665	0.18601	293.442	0.13292
258.95	2.79659	261.651	2.3074	267.191	1.43519	271.672	0.57169	8.71458	0.31982	8.76518	0.1852	8.76458	0.07598	294.356	0.18597	293.135	0.13288
258.298	2.79553	260.902	2.30522	266.491	1.4346	270.869	0.57102	9.0225	0.3224	9.07541	0.19066	9.07272	0.07977	294.048	0.18592	292.827	0.13284
257.591	2.79542	260.099	2.30322	265.745	1.43333	270.157	0.57026	9.33043	0.32427	9.38563	0.19612	9.38086	0.08424	293.74	0.18588	292.52	0.1328
256.965	2.79419	259.423	2.29961	264.992	1.43249	269.465	0.56979	9.63835	0.32589	9.69586	0.20139	9.689	0.08793	293.431	0.18584	292.213	0.13277
256.27	2.79391	258.603	2.29977	264.395	1.43082	268.756	0.56934	9.94628	0.32751	10.0061	0.20656	9.99714	0.09162	293.123	0.18579	291.906	0.13273
255.685	2.79335	257.781	2.29885	263.625	1.42846	268.195	0.56942	10.2542	0.32849	10.3163	0.21172	10.3053	0.09561	292.814	0.18575	291.599	0.13269
255.064	2.79311	257.193	2.29659	262.982	1.42667	267.513	0.56888	10.5621	0.32922	10.6265	0.21689	10.6134	0.09974	292.506	0.18571	291.291	0.13264
254.478	2.79253	256.691	2.29194	262.244	1.42569	266.821	0.56872	10.8701	0.32995	10.9368	0.22183	10.9215	0.10387	292.198	0.18566	290.984	0.1326
253.829	2.79192	255.988	2.29198	261.566	1.42498	266.221	0.56831	11.178	0.33051	11.247	0.22646	11.2297	0.10837	291.889	0.18562	290.677	0.13256
253.329	2.79151	255.297	2.29035	260.746	1.42275	265.614	0.56778	11.4859	0.33099	11.5572	0.23109	11.5378	0.11308	291.581	0.18558	290.37	0.13251
252.729	2.78995	254.6	2.28955	260.095	1.42137	265.023	0.56735	11.7938	0.33148	11.8674	0.23573	11.846	0.11779	291.272	0.18553	290.063	0.13247
252.168	2.78959	253.939	2.2874	259.498	1.41972	264.408	0.56677	12.1017	0.33189	12.1777	0.24029	12.1541	0.12229	290.964	0.18548	289.755	0.13243
251.701	2.78917	253.176	2.2844	258.8	1.41938	263.863	0.56689	12.4097	0.33228	12.4879	0.24457	12.4622	0.12663	290.656	0.18543	289.448	0.13238
251.045	2.78894	252.495	2.28145	258.107	1.41818	263.276	0.56675	12.7176	0.33267	12.7981	0.24885	12.7704	0.13097	290.347	0.18538	289.141	0.13234
250.532	2.78705	251.944	2.27969	257.527	1.4167	262.692	0.56644	13.0255	0.33284	13.1083	0.25312	13.0785	0.13577	290.039	0.18533	288.834	0.13229
250.018	2.78659	251.135	2.27907	256.786	1.41634	262.139	0.56645	13.3334	0.33288	13.4186	0.25616	13.3867	0.14019	289.73	0.18527	288.527	0.13225
249.513	2.78577	250.534	2.27734	256.146	1.4149	261.559	0.56631	13.6414	0.33292	13.7288	0.25962	13.6948	0.14534	289.422	0.18522	288.219	0.13221
249.011	2.78567	249.863	2.27514	255.458	1.41494	261.039	0.56619	13.9493	0.33291	14.039	0.26177	14.0029	0.14995	289.114	0.18516	287.912	0.13215
248.554	2.78528	249.21	2.27343	254.807	1.4133	260.341	0.56572	14.2572	0.33289	14.3492	0.26392	14.3111	0.15403	288.805	0.18511	287.605	0.13208
247.989	2.78391	248.496	2.27035	254.13	1.41333	259.896	0.5656	14.5651	0.33286	14.6595	0.26607	14.6192	0.15887	288.497	0.18505	287.298	0.13202
247.48	2.78275	248.017	2.26897	253.431	1.41196	259.333	0.56504	14.8731	0.33272	14.9697	0.26754	14.9274	0.16278	288.188	0.18499	286.991	0.13195
247.083	2.7821	247.329	2.26674	252.776	1.40894	258.86	0.56477	15.181	0.33249	15.2799	0.26878	15.2355	0.1665	287.88	0.18492	286.684	0.13191
246.512	2.78152	246.708	2.26531	252.095	1.40806	258.269	0.56434	15.4889	0.33226	15.5901	0.27001	15.5436	0.17022	287.571	0.18486	286.376	0.13187
245.972	2.78102	246.08	2.26435	251.382	1.40691	257.85	0.5642	15.7968	0.33203	15.9004	0.27125	15.8518	0.17388	287.263	0.18479	286.069	0.13183
245.498	2.78073	245.39	2.26177	250.655	1.40576	257.271	0.56417	16.1048	0.33178	16.2106	0.27204	16.1599	0.17744	286.955	0.18473	285.762	0.13178
245.006	2.77902	244.747	2.26039	250.041	1.4042	256.718	0.56382	16.4127	0.33153	16.5208	0.27241	16.4681	0.181	286.646	0.18467	285.455	0.13174
244.534	2.77851	244.16	2.25802	249.338	1.4031	256.238	0.56383	16.7206	0.33126	16.831	0.27278	16.7762	0.18439	286.338	0.18461	285.148	0.13169
243.987	2.77761	243.508	2.25559	248.663	1.40274	255.697	0.56364	17.0285	0.33096	17.1413	0.27316	17.0843	0.18753	286.029	0.18455	284.84	0.13165
243.514	2.77712	242.797	2.25403	248.065	1.40192	255.214	0.56338	17.3365	0.33066	17.4515	0.27343	17.3925	0.19066	285.721	0.18449	284.533	0.13161
243.066	2.77658	242.149	2.25113	247.471	1.40034	254.647	0.56305	17.6444	0.33036	17.7617	0.27347	17.7006	0.19357	285.413	0.18444	284.226	0.13157
242.528	2.77549	241.514	2.25012	246.801	1.39984	254.147	0.56279	17.9523	0.33004	18.0719	0.27352	18.0087	0.19607	285.104	0.18439	283.919	0.13153
242.064	2.77442	240.919	2.24792	246.083	1.39812	253.544	0.56258	18.2602	0.32973	18.3822	0.27356	18.3169	0.19857	284.796	0.18434	283.612	0.13149
241.514	2.77368	240.143	2.24549	245.475	1.39741	253.032	0.56228	18.5682	0.32942	18.6924	0.27359	18.625	0.20083	284.487	0.18429	283.304	0.13145
241.023	2.77404	239.642	2.24374	244.879	1.39602	252.533	0.56198	18.8761	0.32909	19.0026	0.27348	18.9332	0.20258	284.179	0.18424	282.997	0.13141
240.489	2.77174	239.006	2.24156	244.113	1.39487	252.061	0.56164	19.184	0.32877	19.3128	0.27337	19.2413	0.20433	283.871	0.18418	282.69	0.13136
239.979	2.77095	238.446	2.23874	243.573	1.39317	251.485	0.5614	19.492	0.32846	19.6231	0.27326	19.5494	0.20589	283.562	0.18413	282.383	0.13132
239.497	2.76957	237.828	2.23598	242.856	1.3918	250.969	0.56117	19.7999	0.32816	19.9333	0.27315	19.8576	0.207	283.254	0.18407	282.076	0.13127
239.044	2.76863	237.172	2.23485	242.163	1.39137	250.423	0.56085	20.1078	0.32786	20.2435	0.27298	20.1657	0.20811	282.945	0.18401	281.768	0.13123
238.522	2.76793	236.596	2.23277	241.482	1.39018	249.943	0.56074	20.4157	0.32756	20.5537	0.27281	20.4738	0.20906	282.637	0.18395	281.461	0.13118
238.11	2.76687	235.997	2.2306	240.888	1.38867	249.422	0.56042	20.7237	0.32726	20.864	0.27264	20.782	0.20956	282.329	0.18389	281.154	0.13113
237.602	2.76547	235.321	2.22708	240.198	1.38772	248.948	0.56018	21.0316	0.32697	21.1742	0.27246	21.0901	0.21006	282.02	0.18383	280.847	0.13108
237.184	2.76326	234.758	2.22508	239.518	1.38667	248.442	0.56009	21.3395	0.32668	21.4844	0.27228	21.3983	0.21049	281.712	0.18377	280.54	0.13102
236.67	2.76172	234.066	2.22275	238.926	1.38549	247.899	0.56003	21.6474	0.32641	21.7947	0.27208	21.7064	0.21068	281.403	0.1837	280.232	0.13097
236.252	2.76228	233.464	2.22062	238.293	1.38471	247.511	0.55984	21.9554	0.32614	22.1049	0.27188	22.0145	0.21087	281.095	0.18364	279.925	0.13092
235.684	2.76057	232.805	2.2176	237.662	1.38365	246.931	0.55958	22.2633	0.32589	22.4151	0.27168	22.3227	0.21103	280.786	0.18358	279.618	0.13086
235.225	2.76082	232.299	2.21487	236.988	1.38284	246.429	0.55934	22.5712	0.32569	22.7253	0.27149	22.6308	0.21106	280.478	0.18351	279.311	0.13081
234.728	2.75914	231.551	2.21283	236.381	1.3819	245.994	0.55903	22.8791	0.32549	23.0356	0.27131	22.9389	0.21109	280.17	0.18345	279.004	0.13075
234.29	2.7592	230.906	2.211	235.819	1.38086	245.409	0.55876	23.1871	0.32524	23.3458	0.27112	23.2471	0.21111	279.861	0.18338	278.696	0.1307
233.826	2.75669	230.357	2.20845	235.157	1.37936	244.922	0.55833	23.495	0.3249	23.656	0.27094	23.5552	0.21109	279.553	0.18332	278.389	0.13067
233.266	2.75583	229.662	2.2064	234.499	1.37766	244.48	0.55812	23.8029	0.32455	23.9662	0.27076	23.8634	0.21106	279.244	0.18326	278.082	0.13063
232.819	2.75414	229.093	2.20418	233.982	1.37535	243.962	0.55782	24.1108	0.32423	24.2765	0.27059	24.1715	0.21103	278.936	0.18319	277.775	0.13059
232.329	2.75252	228.613	2.20162	233.287	1.37414	243.413	0.55757	24.4188	0.32397	24.5867	0.27042	24.4796	0.21098	278.628	0.18313	277.468	0.13054
231.895	2.75301	227.917	2.19869	232.647	1.37232	242.926	0.55735	24.7267	0.32371	24.8969	0.27024	24.7878	0.21092	278.319	0.18308	277.161	0.13048
231.344	2.7525	227.379	2.19604	231.974	1.3706	242.369	0.55721	25.0346	0.32345	25.2071	0.27007	25.0959	0.21087	278.011	0.18303	276.853	0.13043
230.878	2.75205	226.712	2.19319	231.317	1.369	241.911	0.55695	25.3425	0.3232	25.5174	0.2699	25.4041	0.21079	277.702	0.18298	276.546	0.13037
230.377	2.75049	226.169	2.19023	230.744	1.36777	241.405	0.5567	25.6505	0.32295	25.8276	0.26972	25.7122	0.21072	277.394	0.18293	276.239	0.13032
229.918	2.74919	225.651	2.18772	230.075	1.36614	240.88	0.55639	25.9584	0.32271	26.1378	0.26955	26.0203	0.21064	277.086	0.18287	275.932	0.13026
229.45	2.74859	224.992	2.18589	229.411	1.36438	240.298	0.55611	26.2663	0.32248	26.448	0.26938	26.3285	0.21058	276.777	0.18281	275.625	0.13021
228.989	2.74757	224.307	2.18347	228.792	1.36319	239.839	0.55583	26.5742	0.32225	26.7583	0.26921	26.6366	0.21051	276.469	0.18274	275.317	0.13015
228.53	2.74764	223.748	2.18052	228.259	1.36115	239.375	0.55554	26.8822	0.32202	27.0685	0.26905	26.9448	0.21045	276.16	0.18267	275.01	0.1301
228.058	2.74561	223.142	2.17857	227.614	1.3598	238.945	0.55534	27.1901	0.32181	27.3787	0.26889	27.2529	0.21039	275.852	0.18261	274.703	0.13004
227.625	2.74334	222.565	2.17571	226.936	1.35827	238.441	0.55515	27.498	0.3216	27.6889	0.26873	27.561	0.21033	275.544	0.18255	274.396	0.12998
227.19	2.74351	221.968	2.17312	226.388	1.35645	237.977	0.55488	27.8059	0.32138	27.9992	0.26858	27.8692	0.21027	275.235	0.18251	274.089	0.12993
226.792	2.7421	221.285	2.17072	225.766	1.35462	237.491	0.55461	28.1139	0.32117	28.3094	0.26844	28.1773	0.2102	274.927	0.18246	273.781	0.12987
226.25	2.74017	220.8	2.16847	225.104	1.35327	236.959	0.55424	28.4218	0.32096	28.6196	0.26829	28.4855	0.21012	274.618	0.18242	273.474	0.12982
225.79	2.73899	220.125	2.16568	224.54	1.35203	236.518	0.55404	28.7297	0.32075	28.9298	0.26815	28.7936	0.21005	274.31	0.18237	273.167	0.12978
225.379	2.73812	219.54	2.1624	223.905	1.35092	235.999	0.55381	29.0376	0.32057	29.2401	0.26801	29.1017	0.20999	274.001	0.1823	272.86	0.12975
224.953	2.73584	218.97	2.16027	223.244	1.34898	235.526	0.55352	29.3456	0.32038	29.5503	0.26788	29.4099	0.20993	273.693	0.18223	272.553	0.1297
224.449	2.7352	218.422	2.1583	222.686	1.34718	235.046	0.55327	29.6535	0.3202	29.8605	0.26776	29.718	0.20987	273.385	0.18216	272.245	0.12964
224.022	2.7341	217.868	2.15628	221.927	1.34538	234.511	0.55301	29.9614	0.32001	30.1707	0.26763	30.0261	0.20981	273.076	0.18209	271.938	0.12958
223.534	2.73142	217.235	2.15391	221.314	1.34366	234.059	0.55273	30.2693	0.31981	30.4809	0.2675	30.3343	0.20975	272.768	0.18202	271.631	0.12953
223.036	2.73073	216.661	2.15128	220.687	1.34185	233.514	0.55247	30.5773	0.31962	30.7912	0.26738	30.6424	0.20969	272.459	0.18196	271.324	0.12947
222.602	2.72764	216.132	2.14866	220.026	1.34021	233.048	0.55221	30.8852	0.31945	31.1014	0.26726	30.9506	0.20965	272.151	0.18189	271.017	0.12942
222.05	2.72788	215.536	2.14603	219.459	1.33905	232.566	0.55191	31.1931	0.31929	31.4116	0.26714	31.2587	0.2096	271.843	0.18182	270.709	0.12937
221.648	2.72686	214.988	2.14373	218.837	1.33687	232.075	0.55159	31.501	0.31913	31.7218	0.26702	31.5668	0.20956	271.534	0.18175	270.402	0.12932
221.152	2.72511	214.384	2.14153	218.28	1.33552	231.545	0.55137	31.809	0.31896	32.0321	0.2669	31.875	0.20952	271.226	0.18169	270.095	0.12927
220.669	2.72304	213.728	2.13883	217.694	1.33403	231.003	0.55105	32.1169	0.31879	32.3423	0.26679	32.1831	0.20947	270.917	0.18162	269.788	0.12921
220.227	2.72302	213.251	2.13674	217.103	1.33297	230.588	0.55074	32.4248	0.31862	32.6525	0.26668	32.4913	0.20942	270.609	0.18155	269.481	0.12916
219.714	2.72053	212.696	2.13413	216.528	1.33076	230.013	0.55049	32.7327	0.31846	32.9628	0.26656	32.7994	0.20937	270.301	0.18149	269.174	0.1291
219.348	2.72106	212.081	2.13101	215.911	1.32853	229.523	0.55002	33.0407	0.3183	33.273	0.26646	33.1075	0.20933	269.992	0.18142	268.866	0.12903
218.93	2.71822	211.488	2.12871	215.463	1.32722	229.074	0.54981	33.3486	0.31814	33.5832	0.26637	33.4157	0.20929	269.684	0.18136	268.559	0.12897
218.435	2.717	210.949	2.12544	214.961	1.32551	228.634	0.54952	33.6565	0.318	33.8934	0.26627	33.7238	0.20925	269.375	0.1813	268.252	0.12892
218.032	2.71582	210.335	2.12352	214.459	1.32455	228.114	0.54927	33.9644	0.31785	34.2037	0.26618	34.0319	0.20922	269.067	0.18123	267.945	0.12886
217.561	2.71331	209.672	2.12092	214.02	1.32364	227.649	0.54901	34.2724	0.3177	34.5139	0.26609	34.3401	0.20918	268.759	0.18117	267.638	0.12881
217.171	2.7132	209.319	2.11813	213.492	1.32267	227.26	0.54867	34.5803	0.31756	34.8241	0.266	34.6482	0.20915	268.45	0.18111	267.33	0.12876
216.712	2.71215	208.678	2.11614	213.008	1.32153	226.728	0.54831	34.8882	0.31742	35.1343	0.26591	34.9564	0.20911	268.142	0.18105	267.023	0.1287
216.245	2.71169	208.12	2.1133	212.57	1.32	226.244	0.54802	35.1961	0.31728	35.4446	0.26583	35.2645	0.20907	267.833	0.18099	266.716	0.12865
215.803	2.71088	207.576	2.11038	212.029	1.31706	225.759	0.54771	35.5041	0.31713	35.7548	0.26574	35.5726	0.20904	267.525	0.18093	266.409	0.1286
215.378	2.7102	207.061	2.10756	211.61	1.31604	225.371	0.54744	35.812	0.31699	36.065	0.26566	35.8808	0.20901	267.216	0.18087	266.102	0.12855
214.989	2.70875	206.466	2.10475	211.103	1.3151	224.779	0.54716	36.1199	0.31685	36.3752	0.26558	36.1889	0.20898	266.908	0.18081	265.794	0.1285
214.482	2.70826	205.861	2.10216	210.653	1.3137	224.37	0.54698	36.4278	0.31672	36.6855	0.2655	36.4971	0.20895	266.6	0.18075	265.487	0.12844
214.053	2.70729	205.268	2.09998	210.088	1.31319	223.795	0.54661	36.7358	0.3166	36.9957	0.26542	36.8052	0.20892	266.291	0.18069	265.18	0.12839
213.649	2.70673	204.811	2.09655	209.648	1.31173	223.385	0.54643	37.0437	0.31648	37.3059	0.26535	37.1133	0.20888	265.983	0.18063	264.873	0.12834
213.095	2.70613	204.24	2.09335	209.269	1.31023	222.86	0.54608	37.3516	0.31636	37.6161	0.26528	37.4215	0.20885	265.674	0.18057	264.566	0.12829
212.662	2.70443	203.597	2.08951	208.761	1.30869	222.416	0.54579	37.6595	0.31625	37.9264	0.26521	37.7296	0.20882	265.366	0.18051	264.258	0.12823
212.229	2.70358	203.174	2.08726	208.268	1.30684	221.919	0.54554	37.9675	0.31614	38.2366	0.26513	38.0377	0.2088	265.058	0.18044	263.951	0.12818
211.806	2.70215	202.466	2.08592	207.864	1.30572	221.413	0.54522	38.2754	0.31603	38.5468	0.26506	38.3459	0.20877	264.749	0.18037	263.644	0.12813
211.318	2.70028	201.985	2.0834	207.392	1.30464	220.948	0.54493	38.5833	0.31592	38.857	0.265	38.654	0.20874	264.441	0.18031	263.337	0.12808
210.872	2.69964	201.368	2.07966	206.917	1.3027	220.424	0.54464	38.8912	0.31582	39.1673	0.26493	38.9622	0.20871	264.132	0.18025	263.03	0.12803
210.375	2.69843	200.831	2.07864	206.503	1.3016	219.997	0.54433	39.1992	0.31571	39.4775	0.26486	39.2703	0.20869	263.824	0.18019	262.722	0.12797
209.934	2.69657	200.192	2.07551	206.002	1.29999	219.473	0.544	39.5071	0.3156	39.7877	0.2648	39.5784	0.20868	263.516	0.18014	262.415	0.12792
209.552	2.69505	199.702	2.07347	205.563	1.29785	219.061	0.54362	39.815	0.31548	40.0979	0.26474	39.8866	0.20866	263.207	0.18008	262.108	0.12787
209.106	2.69394	199.124	2.07072	205.088	1.29624	218.671	0.54335	40.1229	0.31538	40.4082	0.26468	40.1947	0.20864	262.899	0.18002	261.801	0.12781
208.657	2.69263	198.623	2.06767	204.653	1.29512	218.161	0.54311	40.4309	0.31529	40.7184	0.26462	40.5029	0.20862	262.59	0.17998	261.494	0.12776
208.268	2.6906	198.214	2.06491	204.152	1.29436	217.72	0.54283	40.7388	0.31519	41.0286	0.26456	40.811	0.20859	262.282	0.17993	261.186	0.12771
207.783	2.68895	197.62	2.06247	203.666	1.29281	217.286	0.54248	41.0467	0.3151	41.3388	0.26451	41.1191	0.20857	261.974	0.17989	260.879	0.12766
207.457	2.68887	197.093	2.05951	203.25	1.29168	216.803	0.54213	41.3546	0.31501	41.6491	0.26445	41.4273	0.20855	261.665	0.17984	260.572	0.12761
206.979	2.68694	196.577	2.05656	202.787	1.29047	216.282	0.54173	41.6626	0.31492	41.9593	0.2644	41.7354	0.20852	261.357	0.17979	260.265	0.12756
206.581	2.68702	196.007	2.05413	202.205	1.28879	215.9	0.54148	41.9705	0.31483	42.2695	0.26435	42.0435	0.2085	261.048	0.17972	259.958	0.12751
206.152	2.68444	195.472	2.05062	201.798	1.28855	215.427	0.54111	42.2784	0.31475	42.5797	0.26431	42.3517	0.20848	260.74	0.17966	259.651	0.12746
205.765	2.68286	194.942	2.0502	201.358	1.28611	214.984	0.54085	42.5863	0.31467	42.89	0.26427	42.6598	0.20846	260.431	0.17959	259.343	0.12741
205.31	2.68093	194.317	2.04706	200.869	1.28436	214.447	0.54049	42.8943	0.3146	43.2002	0.26424	42.968	0.20844	260.123	0.17953	259.036	0.12736
204.826	2.67877	193.865	2.0439	200.44	1.28283	214.098	0.54031	43.2022	0.31453	43.5104	0.2642	43.2761	0.20842	259.815	0.17947	258.729	0.12731
204.432	2.67775	193.28	2.04121	199.928	1.28074	213.589	0.53995	43.5101	0.31446	43.8206	0.26417	43.5842	0.20841	259.506	0.17941	258.422	0.12725
204.017	2.67571	192.799	2.03726	199.581	1.2798	213.088	0.53965	43.818	0.31438	44.1309	0.26413	43.8924	0.20839	259.198	0.17935	258.115	0.1272
203.504	2.67265	192.168	2.03559	199.13	1.27866	212.606	0.53937	44.126	0.3143	44.4411	0.2641	44.2005	0.20838	258.889	0.17929	257.807	0.12715
203.064	2.67141	191.656	2.03262	198.661	1.27733	212.186	0.53904	44.4339	0.31422	44.7513	0.26407	44.5087	0.20837	258.581	0.17923	257.5	0.1271
202.655	2.67019	191.091	2.02947	198.261	1.27634	211.662	0.53881	44.7418	0.31415	45.0615	0.26404	44.8168	0.20835	258.273	0.17918	257.193	0.12705
202.222	2.66889	190.528	2.02677	197.768	1.27495	211.219	0.53852	45.0497	0.3141	45.3718	0.26401	45.1249	0.20834	257.964	0.17913	256.886	0.12701
201.77	2.66854	189.972	2.02385	197.366	1.2731	210.744	0.53812	45.3577	0.31404	45.682	0.26398	45.4331	0.20833	257.656	0.17907	256.579	0.12696
201.374	2.66789	189.463	2.0214	196.932	1.27176	210.25	0.5378	45.6656	0.31398	45.9922	0.26395	45.7412	0.20832	257.347	0.17902	256.271	0.12691
200.875	2.66566	189.011	2.01819	196.434	1.27006	209.818	0.53753	45.9735	0.31393	46.3024	0.26392	46.0493	0.20831	257.039	0.17896	255.964	0.12686
200.473	2.66418	188.421	2.01568	196.017	1.26853	209.409	0.53719	46.2814	0.31388	46.6127	0.26389	46.3575	0.2083	256.731	0.17891	255.657	0.12681
200.036	2.664	187.941	2.01266	195.548	1.26819	208.987	0.53696	46.5894	0.31383	46.9229	0.26386	46.6656	0.20829	256.422	0.17885	255.35	0.12675
199.587	2.66115	187.463	2.01088	195.13	1.26732	208.48	0.53657	46.8973	0.31377	47.2331	0.26383	46.9738	0.20828	256.114	0.17879	255.043	0.1267
199.166	2.65765	186.886	2.00814	194.657	1.26632	208.012	0.53615	47.2052	0.31371	47.5433	0.2638	47.2819	0.20827	255.805	0.17873	254.735	0.12666
198.749	2.65745	186.41	2.00504	194.195	1.2644	207.65	0.53585	47.5131	0.31366	47.8536	0.26375	47.59	0.20826	255.497	0.17868	254.428	0.12661
198.435	2.65483	185.897	2.00203	193.733	1.26389	207.188	0.53544	47.8211	0.31362	48.1638	0.26371	47.8982	0.20825	255.189	0.17863	254.121	0.12656
197.979	2.65243	185.426	1.99945	193.326	1.26323	206.777	0.53515	48.129	0.31357	48.474	0.26367	48.2063	0.20825	254.88	0.17858	253.814	0.12651
197.619	2.65152	184.856	1.99567	192.875	1.26182	206.297	0.53483	48.4369	0.31353	48.7843	0.26363	48.5144	0.20824	254.572	0.17853	253.507	0.12647
197.116	2.65282	184.387	1.99331	192.423	1.26116	205.872	0.53446	48.7448	0.31348	49.0945	0.2636	48.8226	0.20824	254.263	0.17848	253.199	0.12642
196.796	2.65173	183.817	1.99145	191.957	1.25954	205.387	0.53424	49.0528	0.31344	49.4047	0.26358	49.1307	0.20823	253.955	0.17843	252.892	0.12637
196.374	2.65065	183.302	1.9889	191.537	1.25844	205.01	0.53387	49.3607	0.31339	49.7149	0.26356	49.4389	0.20823	253.646	0.17837	252.585	0.12632
195.924	2.64966	182.748	1.98626	191.042	1.25652	204.536	0.53357	49.6686	0.31334	50.0251	0.26353	49.747	0.20822	253.338	0.17831	252.278	0.12628
195.484	2.64582	182.246	1.98378	190.629	1.25523	204.129	0.53315	49.9765	0.31329	50.3354	0.26352	50.0551	0.20822	253.03	0.17826	251.971	0.12623
195.115	2.64199	181.688	1.98209	190.13	1.25383	203.636	0.53294	50.2845	0.31325	50.6456	0.2635	50.3633	0.20822	252.721	0.17821	251.664	0.12618
194.661	2.64006	181.146	1.97885	189.643	1.25201	203.18	0.53262	50.5924	0.31323	50.9558	0.26349	50.6714	0.20821	252.413	0.17815	251.356	0.12614
194.226	2.6398	180.585	1.9756	189.301	1.25068	202.656	0.53226	50.9003	0.31321	51.266	0.26347	50.9796	0.20821	252.104	0.1781	251.049	0.12609
193.864	2.63779	180.048	1.97346	188.86	1.24991	202.221	0.53193	51.2082	0.31318	51.5763	0.26346	51.2877	0.20821	251.796	0.17805	250.742	0.12604
193.401	2.63524	179.544	1.97121	188.443	1.24823	201.742	0.53157	51.5162	0.31314	51.8865	0.26345	51.5958	0.2082	251.488	0.17799	250.435	0.126
192.951	2.63179	179.088	1.96769	188.001	1.24708	201.343	0.53123	51.8241	0.31311	52.1967	0.26345	51.904	0.2082	251.179	0.17794	250.128	0.12595
192.544	2.63297	178.591	1.96605	187.564	1.24633	200.869	0.53089	52.132	0.31308	52.507	0.26344	52.2121	0.20819	250.871	0.17788	249.82	0.1259
192.135	2.62706	178.121	1.96365	187.118	1.24501	200.384	0.53049	52.4399	0.31304	52.8172	0.26343	52.5202	0.20819	250.562	0.17783	249.513	0.12585
191.701	2.62748	177.666	1.96064	186.731	1.24402	199.943	0.53021	52.7479	0.31301	53.1274	0.26342	52.8284	0.20819	250.254	0.17777	249.206	0.12581
191.255	2.62525	177.2	1.95787	186.32	1.24254	199.575	0.52986	53.0558	0.31298	53.4376	0.26341	53.1365	0.20818	249.946	0.17772	248.899	0.12576
190.768	2.62549	176.709	1.95536	185.884	1.24166	199.109	0.52956	53.3637	0.31297	53.7478	0.26341	53.4447	0.2082	249.637	0.17767	248.592	0.12571
190.376	2.62387	176.23	1.95153	185.413	1.24039	198.668	0.5291	53.6716	0.31296	54.0581	0.2634	53.7528	0.20821	249.329	0.17761	248.284	0.12566
189.927	2.62459	175.66	1.95005	184.967	1.23894	198.236	0.52878	53.9796	0.31295	54.3683	0.2634	54.0609	0.20822	249.02	0.17756	247.977	0.12561
189.525	2.62216	175.203	1.94811	184.621	1.2377	197.828	0.52847	54.2875	0.31293	54.6785	0.2634	54.3691	0.20823	248.712	0.17751	247.67	0.12556
189.121	2.62067	174.685	1.94432	184.092	1.2369	197.417	0.52815	54.5954	0.31292	54.9888	0.2634	54.6772	0.20823	248.404	0.17745	247.363	0.12551
188.724	2.61909	174.112	1.94073	183.757	1.23486	196.99	0.52796	54.9033	0.3129	55.299	0.2634	54.9854	0.20824	248.095	0.17739	247.056	0.12546
188.311	2.61658	173.711	1.93907	183.302	1.23309	196.514	0.52784	55.2113	0.31288	55.6092	0.2634	55.2935	0.20824	247.787	0.17733	246.748	0.12541
187.956	2.6139	173.171	1.93635	182.858	1.23205	196.15	0.52745	55.5192	0.31287	55.9194	0.2634	55.6016	0.20824	247.478	0.17727	246.441	0.12536
187.498	2.61192	172.666	1.93387	182.397	1.2305	195.649	0.52718	55.8271	0.31285	56.2296	0.2634	55.9098	0.20824	247.17	0.17721	246.134	0.12532
187.108	2.61087	172.166	1.93068	181.959	1.22951	195.238	0.52693	56.135	0.31284	56.5399	0.26341	56.2179	0.20826	246.861	0.17715	245.827	0.12527
186.748	2.60785	171.631	1.92899	181.479	1.22727	194.819	0.52667	56.443	0.31282	56.8501	0.26341	56.526	0.20828	246.553	0.17709	245.52	0.12523
186.321	2.6078	171.076	1.92626	181.056	1.22551	194.317	0.5263	56.7509	0.3128	57.1603	0.26342	56.8342	0.2083	246.245	0.17703	245.212	0.12518
185.931	2.60478	170.553	1.92211	180.619	1.22429	193.99	0.52606	57.0588	0.31271	57.4706	0.26343	57.1423	0.2083	245.936	0.17698	244.905	0.12513
185.503	2.60189	170.029	1.92077	180.213	1.22319	193.523	0.5257	57.3667	0.31262	57.7808	0.26343	57.4505	0.20831	245.628	0.17692	244.598	0.12509
185.058	2.60121	169.587	1.91742	179.748	1.22172	193.044	0.52538	57.6747	0.31255	58.091	0.26344	57.7586	0.20831	245.319	0.17687	244.291	0.12504
184.66	2.59961	169.183	1.91596	179.368	1.22103	192.603	0.52513	57.9826	0.31254	58.4012	0.26345	58.0667	0.20832	245.011	0.17682	243.984	0.12499
184.293	2.59876	168.686	1.91324	178.92	1.2199	192.219	0.52485	58.2905	0.31253	58.7115	0.26346	58.3749	0.20834	244.703	0.17677	243.676	0.12495
183.9	2.59787	168.172	1.91069	178.563	1.21802	191.806	0.52453	58.5984	0.31252	59.0217	0.26346	58.683	0.20836	244.394	0.17672	243.369	0.1249
183.482	2.59575	167.743	1.90718	178.138	1.2172	191.293	0.52417	58.9064	0.31252	59.3319	0.26347	58.9912	0.20837	244.086	0.17667	243.062	0.12485
183.06	2.59455	167.191	1.90567	177.692	1.21666	190.882	0.52389	59.2143	0.31252	59.6421	0.26348	59.2993	0.20839	243.777	0.17661	242.755	0.1248
182.614	2.59282	166.737	1.90297	177.309	1.21521	190.472	0.52363	59.5222	0.31252	59.9524	0.2635	59.6074	0.2084	243.469	0.17656	242.448	0.12475
182.211	2.59225	166.292	1.90179	176.893	1.21549	189.987	0.52327	59.8301	0.31252	60.2626	0.26351	59.9156	0.20841	243.161	0.17651	242.141	0.1247
181.82	2.58814	165.786	1.89797	176.498	1.21408	189.587	0.52295	60.1381	0.31252	60.5728	0.26352	60.2237	0.20842	242.852	0.17645	241.833	0.12465
181.348	2.58599	165.312	1.89423	176.034	1.21264	189.171	0.52266	60.446	0.31252	60.883	0.26354	60.5318	0.20843	242.544	0.17639	241.526	0.12461
180.998	2.58538	164.846	1.89158	175.682	1.21314	188.766	0.52229	60.7539	0.31253	61.1933	0.26355	60.84	0.20845	242.235	0.17633	241.219	0.12457
180.591	2.58389	164.395	1.88946	175.207	1.21201	188.356	0.52197	61.0618	0.31255	61.5035	0.26357	61.1481	0.20846	241.927	0.17627	240.912	0.12452
180.1	2.58052	163.886	1.8869	174.819	1.20967	187.933	0.52166	61.3698	0.31256	61.8137	0.26358	61.4563	0.20847	241.619	0.17621	240.605	0.12448
179.762	2.57997	163.349	1.88331	174.39	1.2092	187.577	0.52134	61.6777	0.31257	62.1239	0.26359	61.7644	0.20849	241.31	0.17615	240.297	0.12444
179.367	2.57719	162.897	1.88054	173.96	1.20842	187.222	0.521	61.9856	0.31257	62.4342	0.2636	62.0725	0.20851	241.002	0.17609	239.99	0.12441
178.997	2.5751	162.378	1.87807	173.605	1.20827	186.708	0.52066	62.2935	0.31258	62.7444	0.26361	62.3807	0.20853	240.693	0.17604	239.683	0.12437
178.64	2.57589	161.932	1.87569	173.07	1.20756	186.303	0.52041	62.6015	0.3126	63.0546	0.26361	62.6888	0.20854	240.385	0.17598	239.376	0.12431
178.204	2.57451	161.423	1.8752	172.715	1.20663	185.915	0.52015	62.9094	0.31261	63.3648	0.26363	62.997	0.20855	240.076	0.17593	239.069	0.12425
177.871	2.57296	160.959	1.87166	172.31	1.20627	185.509	0.51985	63.2173	0.31263	63.6751	0.26365	63.3051	0.20856	239.768	0.17587	238.761	0.12419
177.463	2.57273	160.424	1.87022	171.832	1.20448	185.036	0.51951	63.5252	0.31265	63.9853	0.26367	63.6132	0.20858	239.46	0.17582	238.454	0.12414
177.034	2.57048	159.906	1.86856	171.397	1.20358	184.643	0.51918	63.8332	0.31267	64.2955	0.26369	63.9214	0.20861	239.151	0.17576	238.147	0.12409
176.622	2.56712	159.464	1.8666	170.987	1.20346	184.211	0.51884	64.1411	0.31269	64.6057	0.26371	64.2295	0.20865	238.843	0.1757	237.84	0.12404
176.284	2.56635	158.99	1.86402	170.586	1.20296	183.856	0.51842	64.449	0.31271	64.916	0.26373	64.5376	0.20867	238.534	0.17564	237.533	0.124
175.971	2.56376	158.568	1.86345	170.1	1.20143	183.427	0.5181	64.7569	0.31273	65.2262	0.26375	64.8458	0.20869	238.226	0.17558	237.225	0.12395
175.554	2.5637	158.09	1.86048	169.702	1.20069	182.957	0.51782	65.0649	0.31275	65.5364	0.26377	65.1539	0.20871	237.918	0.17551	236.918	0.1239
175.12	2.56113	157.674	1.85877	169.332	1.19917	182.543	0.51776	65.3728	0.31276	65.8466	0.26379	65.4621	0.20872	237.609	0.17545	236.611	0.12385
174.728	2.55921	157.216	1.85719	168.903	1.19827	182.088	0.51736	65.6807	0.31277	66.1569	0.26381	65.7702	0.20872	237.301	0.17538	236.304	0.1238
174.318	2.5576	156.727	1.8567	168.553	1.19666	181.712	0.5171	65.9886	0.31278	66.4671	0.26384	66.0783	0.20873	236.992	0.17532	235.997	0.12374
173.933	2.55406	156.309	1.85439	168.097	1.19594	181.285	0.51674	66.2966	0.31279	66.7773	0.26386	66.3865	0.20874	236.684	0.17526	235.689	0.12369
173.526	2.55251	155.835	1.85262	167.797	1.19675	180.841	0.51645	66.6045	0.31281	67.0875	0.26389	66.6946	0.20877	236.376	0.1752	235.382	0.12365
173.109	2.55067	155.331	1.85042	167.35	1.19548	180.447	0.51607	66.9124	0.31283	67.3978	0.26391	67.0028	0.20879	236.067	0.17514	235.075	0.1236
172.703	2.54891	154.895	1.84862	166.984	1.1941	179.972	0.5158	67.2203	0.31286	67.708	0.26394	67.3109	0.20882	235.759	0.17509	234.768	0.12356
172.319	2.54896	154.403	1.84599	166.6	1.19267	179.589	0.51555	67.5283	0.31289	68.0182	0.26396	67.619	0.20884	235.45	0.17503	234.461	0.12352
171.988	2.5466	153.967	1.84377	166.194	1.19186	179.201	0.51516	67.8362	0.31292	68.3284	0.26399	67.9272	0.20887	235.142	0.17497	234.154	0.12347
171.53	2.54622	153.488	1.84357	165.82	1.19104	178.81	0.51478	68.1441	0.31294	68.6387	0.26402	68.2353	0.20889	234.834	0.17492	233.846	0.12342
171.106	2.54357	153.017	1.84097	165.361	1.19043	178.451	0.51445	68.452	0.31296	68.9489	0.26405	68.5435	0.20892	234.525	0.17486	233.539	0.12337
170.723	2.54109	152.525	1.83885	164.961	1.18877	178.004	0.51426	68.76	0.31298	69.2591	0.26408	68.8516	0.20895	234.217	0.1748	233.232	0.12332
170.287	2.53999	152.023	1.83736	164.575	1.18565	177.592	0.51395	69.0679	0.31302	69.5693	0.26412	69.1597	0.20897	233.908	0.17473	232.925	0.12327
169.878	2.53801	151.536	1.83759	164.163	1.18511	177.229	0.51377	69.3758	0.31306	69.8796	0.26415	69.4679	0.20899	233.6	0.17466	232.618	0.12323
169.47	2.53626	151.052	1.83618	163.77	1.18334	176.846	0.51342	69.6837	0.31311	70.1898	0.26418	69.776	0.20901	233.292	0.1746	232.31	0.12318
169.188	2.53421	150.553	1.83546	163.351	1.18258	176.402	0.51314	69.9917	0.31314	70.5	0.26421	70.0841	0.20903	232.983	0.17453	232.003	0.12314
168.75	2.53191	150.138	1.83389	162.952	1.18136	176.046	0.51283	70.2996	0.31316	70.8102	0.26424	70.3923	0.20905	232.675	0.17446	231.696	0.12309
168.394	2.53171	149.682	1.83257	162.51	1.17867	175.649	0.51254	70.6075	0.31319	71.1205	0.26428	70.7004	0.20906	232.366	0.17439	231.389	0.12305
168.037	2.5293	149.225	1.83013	162.091	1.17866	175.207	0.51224	70.9154	0.31321	71.4307	0.26431	71.0086	0.20908	232.058	0.17433	231.082	0.12299
167.642	2.52716	148.842	1.82837	161.687	1.17823	174.859	0.51193	71.2234	0.31324	71.7409	0.26435	71.3167	0.20912	231.749	0.17426	230.774	0.12294
167.267	2.5259	148.417	1.82562	161.233	1.1772	174.413	0.51162	71.5313	0.31326	72.0512	0.26439	71.6248	0.20915	231.441	0.1742	230.467	0.12289
166.908	2.52442	147.923	1.8239	160.892	1.17535	173.99	0.51137	71.8392	0.31329	72.3614	0.26443	71.933	0.20919	231.133	0.17414	230.16	0.12285
166.542	2.52267	147.504	1.8216	160.422	1.17496	173.633	0.51099	72.1471	0.31333	72.6716	0.26446	72.2411	0.20921	230.824	0.17408	229.853	0.12281
166.157	2.5216	147.108	1.82071	160.073	1.17496	173.225	0.51061	72.4551	0.31337	72.9818	0.26449	72.5493	0.20923	230.516	0.17403	229.546	0.12276
165.758	2.5214	146.647	1.81844	159.714	1.17292	172.804	0.51032	72.763	0.3134	73.2921	0.26453	72.8574	0.20925	230.207	0.17397	229.238	0.12272
165.388	2.51962	146.215	1.81763	159.322	1.17305	172.396	0.50997	73.0709	0.31344	73.6023	0.26456	73.1655	0.20929	229.899	0.17391	228.931	0.12268
165.005	2.51908	145.757	1.81571	158.905	1.17147	172.009	0.50971	73.3788	0.31347	73.9125	0.26459	73.4737	0.20932	229.591	0.17384	228.624	0.12263
164.65	2.51798	145.311	1.81415	158.584	1.17041	171.599	0.50942	73.6868	0.31351	74.2227	0.26462	73.7818	0.20936	229.282	0.17377	228.317	0.12259
164.232	2.51633	144.852	1.81215	158.172	1.16954	171.187	0.50921	73.9947	0.31355	74.5329	0.26466	74.0899	0.20939	228.974	0.17371	228.01	0.12254
163.9	2.51549	144.401	1.81092	157.844	1.16756	170.743	0.50887	74.3026	0.31359	74.8432	0.26469	74.3981	0.20942	228.665	0.17364	227.702	0.12249
163.463	2.51316	143.965	1.80969	157.458	1.16602	170.371	0.50858	74.6106	0.31362	75.1534	0.26472	74.7062	0.20945	228.357	0.17358	227.395	0.12244
163.096	2.51232	143.528	1.80826	157.078	1.16502	169.918	0.50834	74.9185	0.31365	75.4636	0.26476	75.0144	0.20947	228.049	0.17351	227.088	0.12239
162.714	2.51026	143.041	1.80881	156.67	1.16369	169.517	0.50799	75.2264	0.31369	75.7738	0.26481	75.3225	0.20949	227.74	0.17345	226.781	0.12234
162.277	2.50943	142.624	1.80729	156.216	1.16429	169.146	0.50766	75.5343	0.31372	76.0841	0.26485	75.6306	0.20951	227.432	0.17339	226.474	0.12229
161.963	2.50984	142.188	1.80639	155.889	1.16251	168.802	0.50741	75.8423	0.31377	76.3943	0.26489	75.9388	0.20954	227.123	0.17332	226.166	0.12225
161.527	2.50795	141.637	1.80395	155.48	1.16245	168.39	0.50723	76.1502	0.31381	76.7045	0.26493	76.2469	0.20957	226.815	0.17325	225.859	0.1222
161.112	2.50732	141.249	1.80146	155.12	1.16165	168.058	0.50701	76.4581	0.31386	77.0148	0.26497	76.555	0.20961	226.506	0.17318	225.552	0.12215
160.716	2.50534	140.792	1.79962	154.725	1.15976	167.699	0.50658	76.766	0.31391	77.325	0.26502	76.8632	0.20963	226.198	0.17311	225.245	0.1221
160.316	2.50428	140.315	1.79946	154.328	1.15879	167.299	0.50627	77.0739	0.31397	77.6352	0.26506	77.1713	0.20965	225.89	0.17304	224.938	0.12205
159.97	2.50244	139.867	1.79754	153.94	1.15666	166.917	0.50598	77.3819	0.31401	77.9454	0.2651	77.4795	0.20967	225.581	0.17298	224.631	0.122
159.585	2.50132	139.459	1.79645	153.584	1.15619	166.496	0.50569	77.6898	0.31404	78.2557	0.26514	77.7876	0.20972	225.273	0.17292	224.323	0.12195
159.237	2.50164	139.051	1.79427	153.193	1.1545	166.124	0.50544	77.9977	0.31407	78.5659	0.26518	78.0957	0.20976	224.964	0.17285	224.016	0.1219
158.925	2.50041	138.615	1.79377	152.802	1.15327	165.76	0.50516	78.3056	0.3141	78.8761	0.26523	78.4039	0.20981	224.656	0.17279	223.709	0.12185
158.569	2.50088	138.245	1.7921	152.391	1.15248	165.361	0.50488	78.6136	0.31412	79.1863	0.26526	78.712	0.20985	224.348	0.17273	223.402	0.12181
158.166	2.50014	137.846	1.79017	152.027	1.15166	164.98	0.50474	78.9215	0.31415	79.4965	0.2653	79.0202	0.20989	224.039	0.17267	223.095	0.12176
157.778	2.49874	137.372	1.78809	151.588	1.15029	164.608	0.5044	79.2294	0.31418	79.8068	0.26533	79.3283	0.20993	223.731	0.17261	222.787	0.12172
157.466	2.49778	136.961	1.78662	151.218	1.14983	164.255	0.50418	79.5374	0.31423	80.117	0.26537	79.6364	0.20996	223.422	0.17255	222.48	0.12168
157.105	2.49698	136.535	1.78543	150.844	1.14939	163.808	0.50395	79.8453	0.31428	80.4272	0.26541	79.9446	0.20999	223.114	0.17249	222.173	0.12164
156.698	2.49594	136.083	1.78407	150.431	1.14764	163.44	0.50367	80.1532	0.31433	80.7374	0.26545	80.2527	0.21002	222.806	0.17243	221.866	0.1216
156.398	2.49389	135.632	1.78238	150.018	1.14672	163.044	0.50342	80.4611	0.31437	81.0477	0.2655	80.5609	0.21006	222.497	0.17237	221.559	0.12155
156.002	2.4935	135.236	1.78119	149.647	1.14609	162.633	0.50328	80.769	0.31442	81.3579	0.26555	80.869	0.21009	222.189	0.17231	221.251	0.12151
155.659	2.49189	134.801	1.77998	149.261	1.14559	162.212	0.50304	81.077	0.31447	81.6681	0.2656	81.1771	0.21013	221.88	0.17225	220.944	0.12146
155.293	2.4912	134.4	1.77889	148.911	1.1447	161.823	0.50276	81.3849	0.31453	81.9784	0.26564	81.4853	0.21017	221.572	0.17219	220.637	0.12142
154.878	2.48958	133.967	1.77777	148.563	1.14368	161.424	0.50243	81.6928	0.31459	82.2886	0.26569	81.7934	0.2102	221.264	0.17212	220.33	0.12137
154.496	2.48884	133.459	1.77627	148.202	1.14276	161.061	0.50228	82.0007	0.31464	82.5988	0.26573	82.1015	0.21024	220.955	0.17205	220.023	0.12132
154.111	2.48766	133.049	1.77547	147.862	1.1424	160.612	0.50212	82.3087	0.3147	82.909	0.26578	82.4097	0.21028	220.647	0.17198	219.715	0.12127
153.774	2.48671	132.62	1.77405	147.494	1.14196	160.233	0.50196	82.6166	0.31475	83.2193	0.26583	82.7178	0.21031	220.338	0.17192	219.408	0.12122
153.378	2.48723	132.136	1.77172	147.075	1.14128	159.868	0.50182	82.9245	0.3148	83.5295	0.26588	83.026	0.21035	220.03	0.17185	219.101	0.12117
152.988	2.48603	131.732	1.77123	146.759	1.13996	159.482	0.50157	83.2325	0.31485	83.8397	0.26593	83.3341	0.21038	219.721	0.17178	218.794	0.12111
152.63	2.48454	131.257	1.7703	146.357	1.13937	159.148	0.50133	83.5404	0.3149	84.1499	0.26598	83.6422	0.21042	219.413	0.17172	218.487	0.12106
152.236	2.48561	130.815	1.76908	145.984	1.13829	158.766	0.501	83.8483	0.31496	84.4602	0.26602	83.9504	0.21045	219.105	0.17165	218.179	0.12101
151.872	2.48405	130.413	1.76748	145.614	1.13802	158.457	0.50083	84.1562	0.31503	84.7704	0.26607	84.2585	0.21049	218.796	0.17158	217.872	0.12096
151.485	2.48406	129.94	1.76571	145.287	1.13688	158.071	0.50059	84.4642	0.3151	85.0806	0.26611	84.5666	0.21054	218.488	0.17152	217.565	0.12091
151.122	2.48218	129.534	1.76488	144.916	1.13646	157.648	0.50052	84.7721	0.31517	85.3908	0.26615	84.8748	0.21059	218.179	0.17145	217.258	0.12086
150.698	2.48194	129.171	1.76395	144.512	1.13572	157.281	0.50015	85.08	0.31524	85.7011	0.2662	85.1829	0.21063	217.871	0.17138	216.951	0.12081
150.368	2.48051	128.766	1.76326	144.169	1.13455	156.917	0.4999	85.3879	0.3153	86.0113	0.26625	85.4911	0.21067	217.563	0.17131	216.644	0.12076
149.94	2.47987	128.368	1.76184	143.779	1.13409	156.61	0.4996	85.6958	0.31536	86.3215	0.26631	85.7992	0.21072	217.254	0.17124	216.336	0.12071
149.62	2.47881	127.963	1.76088	143.423	1.13275	156.241	0.49939	86.0038	0.31541	86.6317	0.26636	86.1073	0.21076	216.946	0.17118	216.029	0.12066
149.262	2.47752	127.557	1.75983	143.028	1.13218	155.867	0.49928	86.3117	0.31547	86.942	0.26642	86.4155	0.2108	216.637	0.17111	215.722	0.12061
148.88	2.47554	127.168	1.75881	142.639	1.13187	155.453	0.49908	86.6196	0.31552	87.2522	0.26647	86.7236	0.21085	216.329	0.17104	215.415	0.12056
148.557	2.47512	126.751	1.7578	142.266	1.13113	155.074	0.49891	86.9275	0.31559	87.5624	0.26652	87.0318	0.21089	216.021	0.17097	215.108	0.12051
148.194	2.47393	126.357	1.75664	141.888	1.12987	154.686	0.49868	87.2355	0.31566	87.8726	0.26657	87.3399	0.21094	215.712	0.1709	214.8	0.12046
147.854	2.47396	125.958	1.75565	141.508	1.12858	154.311	0.49841	87.5434	0.31573	88.1829	0.26663	87.648	0.21098	215.404	0.17083	214.493	0.12041
147.529	2.47355	125.549	1.75454	141.106	1.12749	153.981	0.49817	87.8513	0.31579	88.4931	0.26668	87.9562	0.21103	215.095	0.17076	214.186	0.12036
147.17	2.47325	125.116	1.75372	140.692	1.12715	153.572	0.49805	88.1593	0.31585	88.8033	0.26673	88.2643	0.21108	214.787	0.17069	213.879	0.12031
146.849	2.47165	124.716	1.75307	140.362	1.12691	153.247	0.49781	88.4672	0.3159	89.1135	0.26679	88.5725	0.21113	214.479	0.17062	213.572	0.12027
146.474	2.47066	124.291	1.75209	139.978	1.1256	152.839	0.49757	88.7751	0.31596	89.4238	0.26684	88.8806	0.21118	214.17	0.17055	213.264	0.12023
146.086	2.46973	123.892	1.75131	139.625	1.1247	152.433	0.49734	89.083	0.31601	89.734	0.26689	89.1887	0.21122	213.862	0.17048	212.957	0.12019
145.711	2.4688	123.419	1.75043	139.237	1.12373	152.067	0.49712	89.391	0.31607	90.0442	0.26695	89.4969	0.21127	213.553	0.17042	212.65	0.12014
145.425	2.46746	123.055	1.74941	138.953	1.12273	151.623	0.49694	89.6989	0.31613	90.3544	0.267	89.805	0.21131	213.245	0.17035	212.343	0.1201
145.026	2.46676	122.613	1.74871	138.574	1.1227	151.288	0.49706	90.0068	0.3162	90.6647	0.26705	90.1131	0.21136	212.937	0.17028	212.036	0.12006
144.632	2.46533	122.08	1.74872	138.211	1.122	150.916	0.49689	90.3147	0.31626	90.9749	0.2671	90.4213	0.21141	212.628	0.17023	211.728	0.12001
144.343	2.46429	121.749	1.74732	137.878	1.12158	150.545	0.49674	90.6226	0.31631	91.2851	0.26715	90.7294	0.21146	212.32	0.17017	211.421	0.11996
143.941	2.46233	121.3	1.74718	137.533	1.12057	150.124	0.4966	90.9306	0.31636	91.5953	0.26719	91.0376	0.2115	212.011	0.17011	211.114	0.11991
143.562	2.46139	120.879	1.74723	137.205	1.11982	149.758	0.49647	91.2385	0.31641	91.9056	0.26724	91.3457	0.21155	211.703	0.17005	210.807	0.11987
143.211	2.46025	120.289	1.74582	136.823	1.11905	149.436	0.49617	91.5464	0.31648	92.2158	0.26729	91.6538	0.21159	211.394	0.16999	210.5	0.11982
142.857	2.45914	119.951	1.74527	136.448	1.11876	149.104	0.4961	91.8543	0.31655	92.526	0.26734	91.962	0.21164	211.086	0.16993	210.192	0.11977
142.466	2.45908	119.644	1.74472	136.096	1.11805	148.773	0.49587	92.1623	0.31662	92.8362	0.26739	92.2701	0.21168	210.778	0.16986	209.885	0.11972
142.117	2.45634	119.075	1.74509	135.75	1.1165	148.382	0.49567	92.4702	0.31667	93.1465	0.26743	92.5782	0.21173	210.469	0.1698	209.578	0.11968
141.761	2.45608	118.691	1.74545	135.358	1.1163	148.055	0.49557	92.7781	0.31672	93.4567	0.26748	92.8864	0.21178	210.161	0.16974	209.271	0.11963
141.353	2.45579	118.429	1.74545	135.033	1.11567	147.713	0.49529	93.0861	0.31677	93.7669	0.26754	93.1945	0.21184	209.852	0.16967	208.964	0.11958
140.994	2.45416	118.007	1.74545	134.668	1.11502	147.341	0.49502	93.394	0.31684	94.0771	0.2676	93.5027	0.21189	209.544	0.16961	208.656	0.11954
140.611	2.45297	117.553	1.74472	134.308	1.11385	146.977	0.49484	93.7019	0.31692	94.3874	0.26766	93.8108	0.21194	209.236	0.16954	208.349	0.11949
140.235	2.4519	117.361	1.74509	133.917	1.11255	146.606	0.49466	94.0098	0.31699	94.6976	0.26772	94.1189	0.21198	208.927	0.16947	208.042	0.11944
139.896	2.45108	116.977	1.74491	133.556	1.11167	146.256	0.49446	94.3178	0.31707	95.0078	0.26777	94.4271	0.21203	208.619	0.16941	207.735	0.11939
139.515	2.4515	116.408	1.74582	133.199	1.11052	145.885	0.49444	94.6257	0.31714	95.318	0.26781	94.7352	0.21208	208.31	0.16934	207.428	0.11934
139.226	2.45104	116.025	1.74619	132.84	1.1095	145.575	0.49398	94.9336	0.31722	95.6283	0.26786	95.0434	0.21213	208.002	0.16927	207.121	0.11929
138.884	2.44954	115.801	1.746	132.428	1.10893	145.214	0.49388	95.2415	0.31728	95.9385	0.26791	95.3515	0.21219	207.694	0.1692	206.813	0.11923
138.531	2.44864	115.532	1.746	132.075	1.10781	144.859	0.49377	95.5494	0.31734	96.2487	0.26796	95.6596	0.21224	207.385	0.16913	206.506	0.11918
138.221	2.44788	114.925	1.74689	131.696	1.10799	144.468	0.49352	95.8574	0.31739	96.5589	0.26802	95.9678	0.21229	207.077	0.16906	206.199	0.11913
137.846	2.4476	114.695	1.74707	131.359	1.10768	144.11	0.49334	96.1653	0.31746	96.8692	0.26808	96.2759	0.21235	206.768	0.16899	205.892	0.11908
137.549	2.44779	114.234	1.74707	130.956	1.10701	143.766	0.4931	96.4732	0.31752	97.1794	0.26814	96.5841	0.21241	206.46	0.16891	205.585	0.11903
137.205	2.44656	113.78	1.74689	130.576	1.10582	143.371	0.49285	96.7811	0.31758	97.4896	0.26819	96.8922	0.21247	206.152	0.16884	205.277	0.11898
136.834	2.44585	113.326	1.74799	130.159	1.10529	142.994	0.49259	97.0891	0.31765	97.7999	0.26824	97.2003	0.21252	205.843	0.16877	204.97	0.11893
136.515	2.44374	112.866	1.74835	129.836	1.10488	142.644	0.49236	97.397	0.31773	98.1101	0.2683	97.5085	0.21256	205.535	0.1687	204.663	0.11888
136.165	2.44481	112.448	1.74993	129.515	1.10379	142.268	0.49223	97.7049	0.31781	98.4203	0.26835	97.8166	0.21261	205.226	0.16864	204.356	0.11883
135.823	2.44421	112.064	1.75028	129.158	1.10267	141.879	0.49212	98.0129	0.31789	98.7305	0.2684	98.1247	0.21265	204.918	0.16858	204.049	0.11878
135.46	2.44422	111.659	1.75056	128.815	1.10173	141.503	0.49201	98.3208	0.31798	99.0408	0.26845	98.4329	0.21271	204.609	0.16851	203.741	0.11873
135.113	2.44412	111.181	1.75145	128.498	1.10143	141.132	0.49183	98.6287	0.31807	99.351	0.26849	98.741	0.21277	204.301	0.16845	203.434	0.11868
134.76	2.44419	110.788	1.75215	128.168	1.10113	140.81	0.49161	98.9366	0.31816	99.6612	0.26853	99.0492	0.21283	203.993	0.16838	203.127	0.11863
134.424	2.44347	110.342	1.75304	127.796	1.10044	140.373	0.49143	99.2446	0.31824	99.9714	0.26858	99.3573	0.21287	203.684	0.1683	202.82	0.11858
134.101	2.4441	109.935	1.7536	127.471	1.10082	140.019	0.49123	99.5525	0.31832	100.282	0.26862	99.6654	0.21292	203.376	0.16823	202.513	0.11853
133.698	2.44243	109.598	1.7541	127.158	1.10051	139.711	0.49103	99.8604	0.31838	100.592	0.26866	99.9736	0.21297	203.067	0.16816	202.205	0.11848
133.333	2.44242	109.215	1.755	126.786	1.10001	139.369	0.49092	100.168	0.31844	100.902	0.2687	100.282	0.21301	202.759	0.16809	201.898	0.11844
133.006	2.44215	108.795	1.75562	126.469	1.09937	139.077	0.49073	100.476	0.31849	101.212	0.26874	100.59	0.21306	202.451	0.16803	201.591	0.11839
132.614	2.44226	108.439	1.75651	126.086	1.09929	138.724	0.49054	100.784	0.31857	101.523	0.2688	100.898	0.2131	202.142	0.16796	201.284	0.11834
132.285	2.44239	108.085	1.75744	125.753	1.0985	138.399	0.49044	101.092	0.31866	101.833	0.26886	101.206	0.21318	201.834	0.1679	200.977	0.1183
131.924	2.44268	107.728	1.75842	125.387	1.09796	138.049	0.49025	101.4	0.31875	102.143	0.26892	101.514	0.21325	201.525	0.16783	200.669	0.11825
131.552	2.44317	107.304	1.75925	125.035	1.09757	137.676	0.49012	101.708	0.31881	102.453	0.26897	101.822	0.21332	201.217	0.16777	200.362	0.11821
131.189	2.44302	106.958	1.76039	124.687	1.09694	137.407	0.48991	102.016	0.31887	102.763	0.26903	102.131	0.21337	200.909	0.1677	200.055	0.11816
130.799	2.44306	106.556	1.76176	124.353	1.09684	137.078	0.4898	102.324	0.31892	103.074	0.26909	102.439	0.21341	200.6	0.16764	199.748	0.11811
130.483	2.44284	106.213	1.76299	124.004	1.09672	136.707	0.48953	102.632	0.31898	103.384	0.26915	102.747	0.21346	200.292	0.16757	199.441	0.11806
130.095	2.44338	105.812	1.76416	123.632	1.09643	136.384	0.48939	102.94	0.31905	103.694	0.26921	103.055	0.21351	199.983	0.16751	199.134	0.11801
129.805	2.44327	105.418	1.76536	123.282	1.09619	135.98	0.48922	103.248	0.31912	104.004	0.26927	103.363	0.21356	199.675	0.16743	198.826	0.11796
129.46	2.44325	105.036	1.76649	122.933	1.09615	135.679	0.48904	103.555	0.3192	104.315	0.26934	103.671	0.21362	199.367	0.16736	198.519	0.11791
129.141	2.44342	104.639	1.76785	122.558	1.09547	135.312	0.48882	103.863	0.31928	104.625	0.26941	103.979	0.21367	199.058	0.16729	198.212	0.11786
128.811	2.44399	104.245	1.76905	122.193	1.09549	134.918	0.48864	104.171	0.31937	104.935	0.26947	104.288	0.21372	198.75	0.16722	197.905	0.1178
128.512	2.44423	103.844	1.77036	121.832	1.09482	134.644	0.48845	104.479	0.31945	105.245	0.26954	104.596	0.21376	198.441	0.16715	197.598	0.11774
128.183	2.44437	103.451	1.77224	121.491	1.09499	134.287	0.4883	104.787	0.31953	105.555	0.2696	104.904	0.21383	198.133	0.16708	197.29	0.11769
127.872	2.44503	103.06	1.7738	121.096	1.0946	133.904	0.4881	105.095	0.31961	105.866	0.26966	105.212	0.21389	197.824	0.16701	196.983	0.11764
127.526	2.44627	102.689	1.77536	120.724	1.09413	133.529	0.48788	105.403	0.3197	106.176	0.26971	105.52	0.21395	197.516	0.16693	196.676	0.1176
127.213	2.44641	102.266	1.77676	120.375	1.09444	133.215	0.48778	105.711	0.31979	106.486	0.26977	105.828	0.21402	197.208	0.16686	196.369	0.11755
126.844	2.44685	101.874	1.77817	119.979	1.09405	132.826	0.48751	106.019	0.31988	106.796	0.26983	106.136	0.21409	196.899	0.1668	196.062	0.1175
126.546	2.44729	101.422	1.77968	119.677	1.09405	132.479	0.48731	106.327	0.31996	107.107	0.2699	106.444	0.21416	196.591	0.16673	195.754	0.11745
126.18	2.4491	101.047	1.78109	119.36	1.09381	132.139	0.48719	106.635	0.32004	107.417	0.26996	106.753	0.21422	196.282	0.16667	195.447	0.1174
125.854	2.44989	100.648	1.78253	119.071	1.0936	131.8	0.48707	106.943	0.32013	107.727	0.27003	107.061	0.21428	195.974	0.16661	195.14	0.11735
125.545	2.45026	100.227	1.78409	118.7	1.09332	131.405	0.48672	107.251	0.32022	108.037	0.2701	107.369	0.21433	195.666	0.16654	194.833	0.11731
125.173	2.45053	99.8361	1.78575	118.406	1.09319	131.022	0.48656	107.559	0.32032	108.348	0.27018	107.677	0.21439	195.357	0.16649	194.526	0.11726
124.847	2.4517	99.4669	1.78722	118.028	1.09293	130.717	0.48635	107.866	0.32042	108.658	0.27026	107.985	0.21446	195.049	0.16643	194.218	0.11722
124.543	2.45199	99.1271	1.78861	117.734	1.09279	130.338	0.4862	108.174	0.32052	108.968	0.27034	108.293	0.21452	194.74	0.16637	193.911	0.11719
124.166	2.45352	98.7356	1.78996	117.392	1.09248	129.972	0.48607	108.482	0.32061	109.278	0.27041	108.601	0.21458	194.432	0.16631	193.604	0.11715
123.825	2.45458	98.3806	1.79129	117.065	1.0925	129.638	0.48589	108.79	0.32071	109.588	0.27046	108.91	0.21464	194.124	0.16624	193.297	0.11711
123.445	2.45546	97.9892	1.79245	116.746	1.09232	129.312	0.48572	109.098	0.32081	109.899	0.27051	109.218	0.21469	193.815	0.16618	192.99	0.11706
123.16	2.45648	97.6269	1.79368	116.391	1.09216	129.011	0.48555	109.406	0.32091	110.209	0.27056	109.526	0.21474	193.507	0.16611	192.682	0.11702
122.798	2.45774	97.2386	1.79463	116.087	1.09234	128.664	0.48534	109.714	0.32101	110.519	0.27061	109.834	0.21479	193.198	0.16604	192.375	0.11697
122.429	2.45837	96.8262	1.79593	115.761	1.09212	128.365	0.48523	110.022	0.3211	110.829	0.27067	110.142	0.21485	192.89	0.16598	192.068	0.11692
122.067	2.45954	96.4939	1.79722	115.372	1.09258	128.039	0.48491	110.33	0.32118	111.14	0.27073	110.45	0.2149	192.582	0.16591	191.761	0.11688
121.735	2.46062	96.0965	1.79945	115.036	1.0926	127.726	0.48486	110.638	0.32126	111.45	0.27078	110.758	0.21497	192.273	0.16585	191.454	0.11683
121.394	2.46087	95.713	1.80065	114.699	1.09232	127.374	0.48463	110.946	0.32135	111.76	0.27084	111.067	0.21503	191.965	0.16578	191.146	0.11679
121.039	2.46204	95.3493	1.80181	114.348	1.09185	127.05	0.48443	111.254	0.32145	112.07	0.27081	111.375	0.21509	191.656	0.16572	190.839	0.11674
120.692	2.4634	94.9132	1.8028	114.009	1.09195	126.749	0.48427	111.562	0.32155	112.38	0.27078	111.683	0.21516	191.348	0.16566	190.532	0.1167
120.3	2.46524	94.5502	1.80369	113.663	1.09203	126.394	0.48413	111.869	0.32164	112.691	0.27076	111.991	0.21522	191.039	0.1656	190.225	0.11666
119.967	2.46735	94.2204	1.80456	113.29	1.09214	126.091	0.48385	112.177	0.32172	113.001	0.27073	112.299	0.21528	190.731	0.16554	189.918	0.11661
119.629	2.46924	93.8074	1.80535	112.992	1.09254	125.732	0.4837	112.485	0.3218	113.311	0.27077	112.607	0.21533	190.423	0.16548	189.611	0.11656
119.38	2.4707	93.4884	1.80584	112.601	1.09232	125.398	0.48354	112.793	0.32188	113.621	0.27083	112.915	0.21538	190.114	0.16542	189.303	0.11651
119.026	2.47227	93.0997	1.80667	112.294	1.09275	125.081	0.48344	113.101	0.32197	113.932	0.27088	113.224	0.21543	189.806	0.16534	188.996	0.11646
118.74	2.47425	92.7234	1.80756	111.888	1.0926	124.746	0.48324	113.409	0.32207	114.242	0.27094	113.532	0.21548	189.497	0.16527	188.689	0.11641
118.408	2.47589	92.3672	1.80793	111.549	1.09258	124.362	0.48301	113.717	0.32216	114.552	0.27096	113.84	0.21553	189.189	0.1652	188.382	0.11636
118.094	2.47803	91.9774	1.80853	111.167	1.09301	124.075	0.4829	114.025	0.32227	114.862	0.27094	114.148	0.21559	188.881	0.16512	188.075	0.11631
117.784	2.47897	91.5981	1.80904	110.797	1.09289	123.699	0.48271	114.333	0.32237	115.172	0.27092	114.456	0.21566	188.572	0.16505	187.767	0.11626
117.505	2.47922	91.2348	1.8095	110.453	1.09307	123.349	0.4825	114.641	0.32247	115.483	0.2709	114.764	0.21573	188.264	0.16498	187.46	0.11621
117.132	2.48171	90.8547	1.8101	110.088	1.0933	122.999	0.48229	114.949	0.32254	115.793	0.27092	115.072	0.2158	187.955	0.16491	187.153	0.11616
116.82	2.48385	90.4695	1.81048	109.927	1.09346	122.687	0.48209	115.257	0.32262	116.103	0.27102	115.38	0.21587	187.647	0.16484	186.846	0.11611
116.474	2.48502	90.0526	1.81077	109.482	1.09385	122.319	0.48197	115.565	0.32271	116.413	0.27112	115.689	0.21593	187.339	0.16477	186.539	0.11606
116.198	2.48584	89.7193	1.81112	109.144	1.0945	122.002	0.48183	115.873	0.32282	116.724	0.27122	115.997	0.216	187.03	0.16471	186.231	0.11601
115.853	2.4889	89.3447	1.81124	108.835	1.09444	121.663	0.48166	116.18	0.32294	117.034	0.27132	116.305	0.21609	186.722	0.16464	185.924	0.11596
115.546	2.48992	89.022	1.8116	108.519	1.09435	121.238	0.48151	116.488	0.32305	117.344	0.27142	116.613	0.21617	186.413	0.16458	185.617	0.11591
115.237	2.49163	88.6533	1.81175	108.205	1.09478	120.924	0.48141	116.796	0.32313	117.654	0.27151	116.921	0.21625	186.105	0.16451	185.31	0.11587
114.881	2.49422	88.2775	1.81196	107.859	1.09513	120.562	0.48128	117.104	0.32322	117.964	0.27161	117.229	0.21632	185.797	0.16445	185.003	0.11582
114.517	2.49616	87.8957	1.81204	107.572	1.09497	120.292	0.48112	117.412	0.3233	118.275	0.27171	117.537	0.21639	185.488	0.16437	184.695	0.11577
114.195	2.49928	87.5435	1.81198	107.247	1.09529	119.895	0.48098	117.72	0.3234	118.585	0.2718	117.846	0.21646	185.18	0.16429	184.388	0.11572
113.888	2.50196	87.1331	1.8119	106.896	1.09513	119.568	0.4808	118.028	0.3235	118.895	0.27188	118.154	0.21653	184.871	0.16422	184.081	0.11567
113.534	2.50447	86.7567	1.81215	106.576	1.09519	119.247	0.48066	118.336	0.3236	119.205	0.27197	118.462	0.21661	184.563	0.16414	183.774	0.11562
113.217	2.50757	86.3828	1.8119	106.273	1.09582	118.97	0.48053	118.644	0.32372	119.516	0.27206	118.77	0.21667	184.254	0.16407	183.467	0.11557
112.862	2.50978	86.038	1.8117	105.925	1.09609	118.665	0.48041	118.952	0.32383	119.826	0.27213	119.078	0.21673	183.946	0.164	183.159	0.11551
112.534	2.51203	85.6645	1.81161	105.61	1.09621	118.369	0.48028	119.26	0.32394	120.136	0.2722	119.386	0.21678	183.638	0.16394	182.852	0.11547
112.181	2.51377	85.2297	1.81122	105.292	1.09655	118.044	0.48004	119.568	0.32405	120.446	0.27227	119.694	0.21684	183.329	0.16387	182.545	0.11542
111.857	2.51554	84.8863	1.81086	104.935	1.09696	117.724	0.47991	119.876	0.32416	120.757	0.27234	120.003	0.2169	183.021	0.16381	182.238	0.11537
111.537	2.518	84.554	1.81049	104.575	1.09777	117.435	0.47973	120.183	0.32427	121.067	0.27241	120.311	0.21695	182.712	0.16374	181.931	0.11532
111.157	2.5205	84.1746	1.80997	104.273	1.09802	117.126	0.47959	120.491	0.32436	121.377	0.27249	120.619	0.21701	182.404	0.16368	181.624	0.11528
110.801	2.52343	83.8097	1.80983	103.926	1.09832	116.759	0.47948	120.799	0.32445	121.687	0.27257	120.927	0.21707	182.096	0.16362	181.316	0.11523
110.481	2.52602	83.5017	1.80944	103.586	1.09857	116.449	0.47934	121.107	0.32453	121.997	0.27266	121.235	0.21713	181.787	0.16356	181.009	0.11519
110.075	2.52751	83.1106	1.80905	103.222	1.09867	116.13	0.47921	121.415	0.32463	122.308	0.27274	121.543	0.21719	181.479	0.1635	180.702	0.11514
109.807	2.52999	82.7627	1.80859	102.913	1.09924	115.793	0.47907	121.723	0.32472	122.618	0.27282	121.851	0.21725	181.17	0.16342	180.395	0.11509
109.495	2.53269	82.3588	1.80797	102.516	1.09944	115.507	0.47891	122.031	0.32481	122.928	0.27289	122.16	0.21732	180.862	0.16335	180.088	0.11504
109.228	2.53467	82.0024	1.80737	102.184	1.09981	115.191	0.47875	122.339	0.3249	123.238	0.27297	122.468	0.21738	180.554	0.16327	179.78	0.11499
108.909	2.5369	81.6211	1.80677	101.795	1.10015	114.871	0.47854	122.647	0.32499	123.549	0.27305	122.776	0.21744	180.245	0.16319	179.473	0.11494
108.598	2.5399	81.2363	1.80614	101.487	1.10052	114.533	0.47846	122.955	0.32508	123.859	0.27314	123.084	0.2175	179.937	0.16312	179.166	0.11489
108.259	2.54219	80.8697	1.80541	101.188	1.10101	114.202	0.47837	123.263	0.32518	124.169	0.27322	123.392	0.21756	179.628	0.16305	178.859	0.11484
107.957	2.54451	80.4486	1.80468	100.824	1.10115	113.855	0.47821	123.571	0.32529	124.479	0.27331	123.7	0.21762	179.32	0.16298	178.552	0.11479
107.639	2.54601	80.0598	1.80477	100.436	1.10171	113.561	0.47807	123.879	0.32539	124.789	0.27339	124.008	0.21767	179.012	0.16291	178.244	0.11474
107.359	2.54843	79.6952	1.80399	100.069	1.10207	113.208	0.47783	124.186	0.32549	125.1	0.27348	124.317	0.21772	178.703	0.16284	177.937	0.11469
107.028	2.55034	79.352	1.80329	99.7662	1.1025	112.841	0.47767	124.494	0.32558	125.41	0.27357	124.625	0.21777	178.395	0.16278	177.63	0.11463
106.739	2.55216	79.0196	1.80243	99.4574	1.10298	112.527	0.47754	124.802	0.32568	125.72	0.27366	124.933	0.21783	178.086	0.16271	177.323	0.11458
106.429	2.55404	78.6453	1.80165	99.1463	1.10345	112.188	0.47743	125.11	0.32578	126.03	0.27375	125.241	0.21788	177.778	0.16264	177.016	0.11452
106.116	2.55559	78.2887	1.80065	98.8043	1.104	111.859	0.47732	125.418	0.32588	126.341	0.27384	125.549	0.21794	177.469	0.16257	176.708	0.11447
105.78	2.55747	77.8955	1.79969	98.5115	1.10436	111.523	0.4771	125.726	0.32598	126.651	0.27393	125.857	0.218	177.161	0.1625	176.401	0.11441
105.473	2.55958	77.5261	1.79869	98.1841	1.10488	111.15	0.47694	126.034	0.32607	126.961	0.27403	126.165	0.21806	176.853	0.16243	176.094	0.11436
105.144	2.56111	77.1598	1.79778	97.8403	1.10547	110.873	0.47699	126.342	0.32617	127.271	0.27412	126.473	0.21811	176.544	0.16236	175.787	0.11431
104.783	2.56291	76.778	1.79667	97.5482	1.10591	110.5	0.47688	126.65	0.32626	127.581	0.27421	126.782	0.21817	176.236	0.16229	175.48	0.11426
104.486	2.56308	76.4167	1.79572	97.2193	1.10654	110.171	0.47676	126.958	0.32637	127.892	0.27431	127.09	0.21822	175.927	0.16221	175.172	0.11421
104.142	2.56516	76.0046	1.79474	96.886	1.10706	109.83	0.4766	127.266	0.32648	128.202	0.2744	127.398	0.21828	175.619	0.16214	174.865	0.11415
103.823	2.56688	75.6176	1.79348	96.5765	1.10759	109.522	0.47654	127.574	0.32658	128.512	0.2745	127.706	0.21835	175.311	0.16206	174.558	0.1141
103.567	2.56918	75.2506	1.79227	96.1988	1.1081	109.238	0.47635	127.882	0.32669	128.822	0.27459	128.014	0.21841	175.002	0.16199	174.251	0.11405
103.146	2.57125	74.865	1.79118	95.8699	1.10864	108.918	0.47626	128.19	0.3268	129.133	0.27467	128.322	0.21847	174.694	0.16191	173.944	0.114
102.846	2.57274	74.4845	1.78997	95.534	1.10935	108.644	0.47611	128.497	0.3269	129.443	0.27474	128.63	0.21852	174.385	0.16184	173.636	0.11395
102.54	2.57661	74.1501	1.78869	95.1927	1.10987	108.336	0.47605	128.805	0.32701	129.753	0.27482	128.939	0.21858	174.077	0.16176	173.329	0.1139
102.234	2.57873	73.7608	1.78729	94.8887	1.1104	108.009	0.47587	129.113	0.32712	130.063	0.2749	129.247	0.21865	173.769	0.16168	173.022	0.11386
101.829	2.57989	73.4336	1.78602	94.5504	1.11106	107.707	0.47582	129.421	0.32723	130.374	0.27499	129.555	0.21872	173.46	0.16161	172.715	0.11381
101.524	2.581	73.0226	1.78472	94.2637	1.11169	107.439	0.47577	129.729	0.32733	130.684	0.27508	129.863	0.21879	173.152	0.16153	172.408	0.11377
101.198	2.58232	72.6795	1.78327	93.9433	1.11225	107.136	0.47558	130.037	0.32743	130.994	0.27518	130.171	0.21886	172.843	0.16146	172.101	0.11372
100.827	2.58314	72.2816	1.78189	93.6387	1.11283	106.829	0.47541	130.345	0.32753	131.304	0.27527	130.479	0.21893	172.535	0.1614	171.793	0.11368
100.487	2.58431	71.9046	1.78053	93.3191	1.11333	106.519	0.47533	130.653	0.32764	131.614	0.27535	130.787	0.219	172.227	0.16134	171.486	0.11363
100.136	2.5851	71.4962	1.77911	93.0045	1.11404	106.155	0.47518	130.961	0.32775	131.925	0.27542	131.096	0.21906	171.918	0.16127	171.179	0.11358
99.8655	2.58641	71.1269	1.77752	92.6572	1.11466	105.875	0.47506	131.269	0.32787	132.235	0.27549	131.404	0.21912	171.61	0.16121	170.872	0.11354
99.5553	2.58716	70.7072	1.77597	92.3724	1.1152	105.561	0.4749	131.577	0.32797	132.545	0.27556	131.712	0.21919	171.301	0.16115	170.565	0.11349
99.2162	2.58853	70.2966	1.77447	92.0045	1.11606	105.241	0.47481	131.885	0.32806	132.855	0.27564	132.02	0.21925	170.993	0.16108	170.257	0.11344
98.9324	2.59136	69.932	1.77292	91.7161	1.1166	104.909	0.47469	132.193	0.32816	133.166	0.27574	132.328	0.21932	170.684	0.16102	169.95	0.11339
98.619	2.59264	69.5724	1.77129	91.4132	1.11718	104.599	0.47456	132.5	0.32826	133.476	0.27583	132.636	0.21939	170.376	0.16095	169.643	0.11334
98.2984	2.5932	69.2071	1.76962	91.0518	1.11782	104.281	0.47444	132.808	0.32836	133.786	0.27593	132.944	0.21945	170.068	0.16089	169.336	0.11329
97.9967	2.59988	68.8248	1.76789	90.7498	1.11837	103.977	0.47434	133.116	0.32847	134.096	0.27603	133.253	0.21952	169.759	0.16082	169.029	0.11324
97.6898	2.60068	68.4431	1.76622	90.3931	1.11889	103.657	0.47421	133.424	0.32856	134.406	0.27611	133.561	0.21959	169.451	0.16075	168.721	0.11319
97.3962	2.60147	68.0546	1.76446	90.0746	1.11944	103.344	0.47417	133.732	0.32866	134.717	0.2762	133.869	0.21966	169.142	0.16067	168.414	0.11313
97.0251	2.60278	67.6849	1.76264	89.7685	1.12004	102.978	0.47404	134.04	0.32875	135.027	0.27629	134.177	0.21973	168.834	0.1606	168.107	0.11308
96.7379	2.60332	67.2893	1.76092	89.4446	1.1206	102.653	0.47395	134.348	0.32885	135.337	0.27637	134.485	0.2198	168.526	0.16053	167.8	0.11302
96.3929	2.60441	66.9031	1.75953	89.1359	1.12115	102.323	0.47382	134.656	0.32895	135.647	0.27643	134.793	0.21988	168.217	0.16046	167.493	0.11297
96.0759	2.60483	66.4917	1.75786	88.8041	1.12169	101.995	0.47368	134.964	0.32905	135.958	0.27649	135.101	0.21996	167.909	0.16039	167.185	0.11292
95.7895	2.60601	66.0975	1.75587	88.5154	1.12222	101.66	0.47358	135.272	0.32916	136.268	0.27655	135.41	0.22004	167.6	0.16032	166.878	0.11287
95.4452	2.60674	65.6824	1.75397	88.2124	1.12284	101.327	0.47347	135.58	0.32928	136.578	0.27661	135.718	0.22011	167.292	0.16025	166.571	0.11282
95.1029	2.60736	65.2525	1.75208	87.8769	1.12334	100.993	0.47338	135.888	0.3294	136.888	0.27671	136.026	0.22018	166.984	0.16018	166.264	0.11277
94.7841	2.6078	64.8615	1.75006	87.537	1.12388	100.669	0.4733	136.196	0.32951	137.198	0.27682	136.334	0.22025	166.675	0.16011	165.957	0.11273
94.5063	2.60884	64.48	1.7479	87.2511	1.12433	100.343	0.47314	136.503	0.32961	137.509	0.27693	136.642	0.22032	166.367	0.16004	165.649	0.11268
94.2136	2.61009	64.1295	1.74587	86.9263	1.12481	100.013	0.47311	136.811	0.3297	137.819	0.27703	136.95	0.22039	166.058	0.15996	165.342	0.11263
93.8848	2.61048	63.7382	1.74378	86.5708	1.12533	99.6901	0.47294	137.119	0.32981	138.129	0.27714	137.258	0.22046	165.75	0.15989	165.035	0.11258
93.5808	2.61109	63.3487	1.74172	86.2445	1.12578	99.3839	0.47289	137.427	0.32993	138.439	0.27724	137.566	0.22054	165.442	0.15982	164.728	0.11253
93.2931	2.61142	62.9096	1.73959	85.9411	1.1262	99.0982	0.47269	137.735	0.33005	138.75	0.27733	137.875	0.22062	165.133	0.15974	164.421	0.11248
93.0032	2.61219	62.5171	1.7373	85.6278	1.12657	98.776	0.47253	138.043	0.33016	139.06	0.27743	138.183	0.22071	164.825	0.15967	164.114	0.11242
92.6664	2.6132	62.1285	1.73512	85.2601	1.12705	98.4875	0.47245	138.351	0.33028	139.37	0.27753	138.491	0.2208	164.516	0.15959	163.806	0.11236
92.3542	2.61337	61.7181	1.73282	84.959	1.12743	98.201	0.47231	138.659	0.33039	139.68	0.27762	138.799	0.22088	164.208	0.15952	163.499	0.1123
92.0675	2.61426	61.2779	1.73044	84.6342	1.12789	97.8469	0.47226	138.967	0.33052	139.99	0.27772	139.107	0.22096	163.899	0.15945	163.192	0.11225
91.7175	2.61445	60.8593	1.72814	84.3335	1.12832	97.5552	0.47213	139.275	0.33066	140.301	0.27782	139.415	0.22104	163.591	0.15939	162.885	0.1122
91.4224	2.61517	60.4178	1.72582	84.0377	1.12861	97.2716	0.47206	139.583	0.33081	140.611	0.27791	139.723	0.22112	163.283	0.15932	162.578	0.11215
91.0981	2.61543	59.9723	1.72332	83.7105	1.12909	96.9566	0.47203	139.891	0.33094	140.921	0.278	140.032	0.2212	162.974	0.15925	162.27	0.1121
90.8037	2.61597	59.6037	1.72097	83.4053	1.12951	96.6491	0.47204	140.199	0.33105	141.231	0.27809	140.34	0.22127	162.666	0.15919	161.963	0.11206
90.4822	2.61554	59.1997	1.71848	83.0637	1.12989	96.3061	0.47198	140.507	0.33115	141.542	0.27817	140.648	0.22135	162.357	0.15914	161.656	0.11201
90.1479	2.61689	58.8036	1.71592	82.77	1.13017	95.9656	0.47183	140.814	0.33125	141.852	0.27826	140.956	0.22142	162.049	0.15908	161.349	0.11197
89.8735	2.61765	58.3799	1.7132	82.4516	1.13054	95.7049	0.47172	141.122	0.33135	142.162	0.27834	141.264	0.22149	161.741	0.15902	161.042	0.11193
89.5647	2.61797	57.9702	1.71062	82.148	1.13088	95.3445	0.47161	141.43	0.33145	142.472	0.27843	141.572	0.22157	161.432	0.15896	160.734	0.11189
89.291	2.61838	57.5638	1.70787	81.784	1.13119	95.0792	0.47154	141.738	0.33156	142.783	0.27851	141.88	0.22165	161.124	0.15891	160.427	0.11185
88.9939	2.61888	57.1237	1.70528	81.4848	1.13154	94.7719	0.47149	142.046	0.33168	143.093	0.27859	142.189	0.22173	160.815	0.15885	160.12	0.1118
88.6862	2.61905	56.6735	1.70245	81.1505	1.1319	94.4746	0.47142	142.354	0.3318	143.403	0.27869	142.497	0.2218	160.507	0.15879	159.813	0.11174
88.3833	2.61961	56.2146	1.69958	80.8365	1.13215	94.1763	0.47135	142.662	0.33191	143.713	0.27879	142.805	0.22186	160.199	0.15874	159.506	0.11169
88.0798	2.6195	55.7613	1.69693	80.5052	1.1325	93.8754	0.47127	142.97	0.33202	144.023	0.27889	143.113	0.22193	159.89	0.15869	159.198	0.11164
87.7833	2.61973	55.2877	1.69403	80.1671	1.13269	93.6084	0.47116	143.278	0.33213	144.334	0.27899	143.421	0.22199	159.582	0.15864	158.891	0.11159
87.4601	2.62014	54.8426	1.69099	79.8274	1.1329	93.2573	0.47105	143.586	0.33223	144.644	0.2791	143.729	0.22206	159.273	0.15859	158.584	0.11154
87.1836	2.61972	54.4157	1.68796	79.5543	1.13376	92.9584	0.47099	143.894	0.33233	144.954	0.27921	144.037	0.22213	158.965	0.15855	158.277	0.1115
86.8579	2.62004	53.996	1.68491	79.2693	1.13417	92.6529	0.47091	144.202	0.33242	145.264	0.27933	144.346	0.2222	158.657	0.1585	157.97	0.11145
86.5567	2.61956	53.5723	1.68164	78.9351	1.13429	92.3816	0.4708	144.51	0.33252	145.575	0.27944	144.654	0.22228	158.348	0.15842	157.662	0.11141
86.251	2.61994	53.1222	1.67838	78.6164	1.13452	92.0892	0.47074	144.817	0.33263	145.885	0.27956	144.962	0.22236	158.04	0.15834	157.355	0.11137
85.9332	2.61975	52.6434	1.67524	78.2973	1.13472	91.735	0.47063	145.125	0.33273	146.195	0.27965	145.27	0.22243	157.731	0.15827	157.048	0.11133
85.6075	2.62077	52.2132	1.67181	78.0037	1.13494	91.4215	0.47059	145.433	0.33284	146.505	0.27975	145.578	0.2225	157.423	0.15819	156.741	0.11129
85.2653	2.62058	51.7268	1.66847	77.6813	1.13518	91.1162	0.47052	145.741	0.33294	146.815	0.27984	145.886	0.22257	157.114	0.15813	156.434	0.11125
84.9888	2.62064	51.2335	1.66491	77.3456	1.13544	90.8536	0.47046	146.049	0.33305	147.126	0.27994	146.194	0.22262	156.806	0.15808	156.126	0.11121
84.6598	2.62057	50.7492	1.6615	77.0263	1.13543	90.535	0.47036	146.357	0.33316	147.436	0.28004	146.502	0.22268	156.498	0.15803	155.819	0.11116
84.3872	2.62068	50.2505	1.65783	76.7073	1.13571	90.1998	0.47031	146.665	0.3333	147.746	0.28015	146.811	0.22274	156.189	0.15799	155.512	0.11111
84.0862	2.62066	49.766	1.65418	76.3459	1.13581	89.8819	0.4702	146.973	0.33344	148.056	0.28025	147.119	0.22281	155.881	0.15794	155.205	0.11107
83.7878	2.62022	49.2596	1.65045	76.0231	1.13593	89.6005	0.47015	147.281	0.33358	148.367	0.28036	147.427	0.22288	155.572	0.15788	154.898	0.11102
83.4862	2.6199	48.8023	1.64659	75.7167	1.13598	89.3192	0.47006	147.589	0.33369	148.677	0.28047	147.735	0.22295	155.264	0.15781	154.591	0.11097
83.2127	2.61982	48.2809	1.64261	75.3722	1.13611	89.0257	0.46999	147.897	0.3338	148.987	0.28058	148.043	0.22302	154.956	0.15774	154.283	0.11092
82.9056	2.61971	47.7784	1.63864	75.0099	1.13607	88.7212	0.46994	148.205	0.33392	149.297	0.2807	148.351	0.22308	154.647	0.15768	153.976	0.11088
82.6004	2.62	47.3006	1.6344	74.7004	1.13626	88.4164	0.4698	148.513	0.33402	149.607	0.28081	148.659	0.22315	154.339	0.15761	153.669	0.11083
82.2509	2.6202	46.8	1.63022	74.3881	1.13629	88.116	0.46979	148.82	0.33413	149.918	0.28093	148.968	0.22321	154.03	0.15755	153.362	0.11079
81.9454	2.61964	46.2809	1.6259	74.0798	1.13643	87.7989	0.46966	149.128	0.33424	150.228	0.28106	149.276	0.22328	153.722	0.15748	153.055	0.11075
81.6483	2.61938	45.7385	1.62146	73.7727	1.13649	87.5532	0.46963	149.436	0.33431	150.538	0.28119	149.584	0.22335	153.414	0.15742	152.747	0.11071
81.3364	2.61914	45.1718	1.61685	73.4407	1.13648	87.2275	0.4696	149.744	0.33438	150.848	0.28132	149.892	0.22342	153.105	0.15736	152.44	0.11067
81.0226	2.61881	44.6518	1.61213	73.1282	1.13653	86.9121	0.4695	150.052	0.33445	151.159	0.28144	150.2	0.22348	152.797	0.1573	152.133	0.11063
80.7065	2.61874	44.1053	1.60737	72.8128	1.13653	86.6354	0.46939	150.36	0.33455	151.469	0.28154	150.508	0.22355	152.488	0.15725	151.826	0.11059
80.3868	2.61861	43.5408	1.60237	72.4753	1.13647	86.3147	0.46936	150.668	0.33464	151.779	0.28164	150.816	0.22361	152.18	0.15721	151.519	0.11054
80.0557	2.61873	42.9552	1.59741	72.1593	1.13658	85.9986	0.46927	150.976	0.33474	152.089	0.28173	151.125	0.22368	151.872	0.15716	151.211	0.1105
79.7648	2.61892	42.3791	1.59225	71.8052	1.1364	85.6947	0.46925	151.284	0.33483	152.399	0.28183	151.433	0.22374	151.563	0.15711	150.904	0.11045
79.4303	2.61878	41.7856	1.58691	71.4728	1.13629	85.3889	0.46921	151.592	0.33492	152.71	0.28196	151.741	0.22381	151.255	0.15705	150.597	0.11041
79.1449	2.61871	41.2012	1.58148	71.1211	1.1363	85.0587	0.46918	151.9	0.33502	153.02	0.2821	152.049	0.22388	150.946	0.15698	150.29	0.11037
78.885	2.6184	40.6171	1.57571	70.7815	1.13622	84.7677	0.46911	152.208	0.33514	153.33	0.28223	152.357	0.22396	150.638	0.15692	149.983	0.11032
78.5734	2.61799	39.9922	1.56978	70.4308	1.13623	84.4702	0.46907	152.516	0.33527	153.64	0.28237	152.665	0.22404	150.329	0.15685	149.675	0.11027
78.2713	2.61794	39.3183	1.56369	70.0993	1.13609	84.1749	0.46896	152.824	0.3354	153.951	0.28249	152.973	0.22412	150.021	0.15679	149.368	0.11023
77.9507	2.61767	38.6838	1.55739	69.7864	1.13598	83.9025	0.46896	153.131	0.33551	154.261	0.2826	153.282	0.22421	149.713	0.15674	149.061	0.11018
77.6186	2.61714	38.0348	1.55069	69.4383	1.13585	83.6074	0.46888	153.439	0.33561	154.571	0.28271	153.59	0.22431	149.404	0.15669	148.754	0.11013
77.3271	2.61713	37.3495	1.544	69.1324	1.13571	83.3341	0.46885	153.747	0.33572	154.881	0.28282	153.898	0.22441	149.096	0.15664	148.447	0.11008
76.9982	2.6166	36.6242	1.53686	68.8147	1.13556	83.0525	0.4689	154.055	0.33585	155.192	0.28291	154.206	0.22452	148.787	0.15658	148.139	0.11003
76.6784	2.61653	35.8678	1.52974	68.4812	1.13548	82.7457	0.46888	154.363	0.33598	155.502	0.28299	154.514	0.22462	148.479	0.15653	147.832	0.10999
76.3636	2.61612	35.1556	1.52192	68.1539	1.13535	82.4086	0.46886	154.671	0.33611	155.812	0.28307	154.822	0.22472	148.171	0.15646	147.525	0.10994
76.0276	2.61571	34.4038	1.51384	67.83	1.13511	82.1094	0.46881	154.979	0.33621	156.122	0.28314	155.13	0.22482	147.862	0.1564	147.218	0.1099
75.7289	2.61565	33.5836	1.50529	67.5014	1.13498	81.8125	0.46878	155.287	0.33631	156.432	0.28323	155.439	0.22494	147.554	0.15634	146.911	0.10986
75.3848	2.61556	32.723	1.49629	67.1723	1.13475	81.493	0.46877	155.595	0.3364	156.743	0.28334	155.747	0.22506	147.245	0.15628	146.604	0.10981
75.0454	2.61495	31.8863	1.48684	66.7909	1.13454	81.2135	0.4687	155.903	0.33652	157.053	0.28345	156.055	0.22518	146.937	0.15624	146.296	0.10977
74.7608	2.61481	30.9812	1.47697	66.4457	1.13433	80.8538	0.46867	156.211	0.33665	157.363	0.28356	156.363	0.22527	146.629	0.15619	145.989	0.10972
74.424	2.61399	30.0599	1.46653	66.0935	1.13415	80.5768	0.46863	156.519	0.33678	157.673	0.28367	156.671	0.22536	146.32	0.15614	145.682	0.10968
74.1532	2.61405	29.0733	1.45532	65.7805	1.13394	80.2513	0.46862	156.827	0.33688	157.984	0.28381	156.979	0.22546	146.012	0.1561	145.375	0.10964
73.8431	2.61345	28.0535	1.44341	65.3797	1.13373	79.9494	0.46854	157.134	0.33698	158.294	0.28394	157.287	0.22553	145.703	0.15604	145.068	0.1096
73.5282	2.61269	26.9827	1.43075	65.0174	1.13375	79.6739	0.46851	157.442	0.33707	158.604	0.28407	157.595	0.22559	145.395	0.15599	144.76	0.10956
73.2371	2.61237	25.8162	1.41694	64.7243	1.13343	79.3802	0.4685	157.75	0.3372	158.914	0.28421	157.904	0.22566	145.087	0.15593	144.453	0.10952
72.9109	2.61184	24.5584	1.40178	64.3919	1.13321	79.0788	0.46844	158.058	0.33735	159.224	0.28429	158.212	0.22572	144.778	0.15588	144.146	0.10948
72.6042	2.61093	23.3142	1.38662	64.0359	1.13291	78.7999	0.46844	158.366	0.33749	159.535	0.28437	158.52	0.22579	144.47	0.15582	143.839	0.10944
72.2974	2.61046	21.7035	1.36651	63.73	1.13254	78.5021	0.46842	158.674	0.33762	159.845	0.28445	158.828	0.22586	144.161	0.15576	143.532	0.1094
71.9775	2.61001	20.0471	1.34645	63.3739	1.13227	78.1987	0.46831	158.982	0.33775	160.155	0.28452	159.136	0.22593	143.853	0.15571	143.224	0.10935
71.6401	2.60955	18.2635	1.32718	63.0309	1.13196	77.8753	0.46832	159.29	0.33788	160.465	0.28466	159.444	0.226	143.544	0.15565	142.917	0.1093
71.2981	2.60862	16.2783	1.30485	62.6846	1.13156	77.5917	0.46829	159.598	0.338	160.776	0.28482	159.752	0.22608	143.236	0.15559	142.61	0.10926
71.0008	2.60835	14.1028	1.28184	62.3222	1.13119	77.2822	0.4683	159.906	0.33813	161.086	0.28498	160.061	0.22615	142.928	0.15554	142.303	0.10921
70.6318	2.60741	11.8304	1.26138	61.9636	1.13079	77.0069	0.46826	160.214	0.33825	161.396	0.28514	160.369	0.22622	142.619	0.15549	141.996	0.10917
70.3339	2.60674	10.32	1.24791	61.6087	1.13035	76.6925	0.46822	160.522	0.33836	161.706	0.28527	160.677	0.22629	142.311	0.15545	141.688	0.10913
69.9877	2.60614	9.4449	1.24022	61.2589	1.12999	76.3627	0.46821	160.83	0.33846	162.016	0.28538	160.985	0.22636	142.002	0.15541	141.381	0.10908
69.6866	2.60545	8.863	1.23617	60.8773	1.12954	76.0341	0.46822	161.137	0.33856	162.327	0.28548	161.293	0.22642	141.694	0.15536	141.074	0.10904
69.3789	2.60463	8.4204	1.23266	60.5097	1.12907	75.7448	0.46823	161.445	0.33867	162.637	0.28558	161.601	0.22649	141.386	0.15532	140.767	0.109
69.0641	2.60385	7.9479	1.22962	60.1092	1.12867	75.38	0.46819	161.753	0.33877	162.947	0.28569	161.909	0.22654	141.077	0.15527	140.46	0.10896
68.7449	2.60345	7.6807	1.22738	59.7657	1.12818	75.1024	0.4682	162.061	0.33888	163.257	0.28582	162.218	0.22659	140.769	0.15523	140.152	0.10892
68.4395	2.60252	7.3407	1.22472	59.4304	1.12767	74.8094	0.4682	162.369	0.33899	163.568	0.28596	162.526	0.22664	140.46	0.15519	139.845	0.10887
68.1091	2.60202	6.9649	1.222	59.0927	1.12718	74.4943	0.46818	162.677	0.33911	163.878	0.28609	162.834	0.2267	140.152	0.15514	139.538	0.10883
67.7861	2.60144	6.6527	1.21951	58.7344	1.1267	74.2244	0.46809	162.985	0.33922	164.188	0.28623	163.142	0.22676	139.844	0.15509	139.231	0.10878
67.4864	2.60095	6.3257	1.21728	58.3849	1.12617	73.9017	0.46813	163.293	0.33934	164.498	0.28636	163.45	0.22681	139.535	0.15504	138.924	0.10874
67.1392	2.60092	6.0704	1.21585	58.0146	1.12558	73.633	0.46816	163.601	0.33948	164.809	0.2865	163.758	0.22688	139.227	0.15499	138.616	0.10869
66.8194	2.59999	5.9537	1.21512	57.6436	1.12571	73.3178	0.46815	163.909	0.33961	165.119	0.28663	164.066	0.22694	138.918	0.15494	138.309	0.10865
66.4873	2.59944	5.8456	1.21414	57.2847	1.12511	73.0108	0.46814	164.217	0.33974	165.429	0.28676	164.375	0.22701	138.61	0.15489	138.002	0.10861
66.1411	2.59898	5.7023	1.21311	56.8926	1.12454	72.7119	0.46814	164.525	0.33987	165.739	0.28692	164.683	0.22707	138.302	0.15484	137.695	0.10857
65.9103	2.59802	5.5516	1.21228	56.4999	1.12398	72.3834	0.46818	164.833	0.34	166.049	0.28709	164.991	0.22714	137.993	0.15479	137.388	0.10852
65.4656	2.59741	5.4342	1.21153	56.1012	1.12341	72.0879	0.46811	165.141	0.3401	166.36	0.28726	165.299	0.2272	137.685	0.15474	137.081	0.10848
65.1188	2.59682	5.338	1.21084	55.7048	1.12272	71.7662	0.46812	165.448	0.34017	166.67	0.28743	165.607	0.22727	137.376	0.15468	136.773	0.10843
64.8121	2.59632	5.2538	1.21035	55.3044	1.122	71.4393	0.46814	165.756	0.34025	166.98	0.28755	165.915	0.22734	137.068	0.15464	136.466	0.10839
64.4861	2.59538	5.174	1.20977	54.9111	1.12127	71.1448	0.46809	166.064	0.34033	167.29	0.28764	166.223	0.22742	136.76	0.15459	136.159	0.10834
64.1623	2.59458	5.0859	1.20922	54.5324	1.12061	70.8369	0.46817	166.372	0.34041	167.601	0.28772	166.531	0.2275	136.451	0.15455	135.852	0.10829
63.8258	2.59363	4.9665	1.20832	54.1664	1.11988	70.471	0.46823	166.68	0.3405	167.911	0.2878	166.84	0.22757	136.143	0.1545	135.545	0.10825
63.5201	2.59247	4.8212	1.20729	53.7885	1.11923	70.1552	0.46819	166.988	0.34061	168.221	0.28791	167.148	0.22764	135.834	0.15446	135.237	0.10821
63.2016	2.59176	4.6654	1.20632	53.4279	1.11841	69.8596	0.46824	167.296	0.34075	168.531	0.28805	167.456	0.22772	135.526	0.15441	134.93	0.10816
62.8655	2.59091	4.5142	1.2053	53.0262	1.11774	69.5731	0.46826	167.604	0.34089	168.841	0.28819	167.764	0.22779	135.217	0.15436	134.623	0.10812
62.5126	2.59017	4.4012	1.20462	52.6402	1.11686	69.2819	0.46828	167.912	0.34102	169.152	0.28833	168.072	0.22787	134.909	0.15431	134.316	0.10808
62.191	2.58927	4.3276	1.20419	52.2314	1.11605	68.9696	0.46832	168.22	0.34115	169.462	0.28847	168.38	0.22796	134.601	0.15426	134.009	0.10804
61.8476	2.58861	4.2729	1.20374	51.8106	1.1152	68.6724	0.46835	168.528	0.34128	169.772	0.2886	168.688	0.22807	134.292	0.1542	133.701	0.10801
61.4954	2.58755	4.1984	1.20335	51.4006	1.11429	68.3302	0.46836	168.836	0.34141	170.082	0.28873	168.997	0.22819	133.984	0.15415	133.394	0.10797
61.1474	2.58662	4.1649	1.20309	50.9573	1.11346	68.0531	0.46844	169.144	0.34155	170.393	0.28886	169.305	0.22829	133.675	0.1541	133.087	0.10793
60.7688	2.58584	4.1235	1.20276	50.5308	1.11249	67.712	0.46842	169.451	0.34168	170.703	0.28898	169.613	0.22838	133.367	0.15405	132.78	0.10789
60.4106	2.58478	4.081	1.20249	50.0869	1.1115	67.3784	0.46847	169.759	0.34183	171.013	0.28914	169.921	0.22847	133.059	0.15399	132.473	0.10785
60.0243	2.58363	4.0437	1.20218	49.6572	1.11057	67.1004	0.46857	170.067	0.34199	171.323	0.2893	170.229	0.22855	132.75	0.15394	132.165	0.10781
59.696	2.58271	4.0007	1.20187	49.2398	1.10949	66.7696	0.46854	170.375	0.34215	171.633	0.28946	170.537	0.22864	132.442	0.1539	131.858	0.10777
59.3887	2.58191	3.9628	1.20161	48.8163	1.10855	66.4324	0.46861	170.683	0.34232	171.944	0.28963	170.845	0.22872	132.133	0.15385	131.551	0.10773
59.0308	2.58106	3.923	1.20118	48.385	1.10741	66.1171	0.4687	170.991	0.3425	172.254	0.28978	171.154	0.22881	131.825	0.1538	131.244	0.10769
58.7207	2.57984	3.8332	1.20046	47.9377	1.1063	65.7846	0.46892	171.299	0.34267	172.564	0.28993	171.462	0.22888	131.517	0.15375	130.937	0.10766
58.366	2.57877	3.7318	1.19997	47.5163	1.10526	65.4412	0.46899	171.607	0.34283	172.874	0.29008	171.77	0.22896	131.208	0.1537	130.629	0.10763
58.0173	2.57788	3.6535	1.1993	47.0594	1.10411	65.0977	0.4693	171.915	0.34296	173.185	0.29023	172.078	0.22904	130.9	0.15365	130.322	0.1076
57.6753	2.57678	3.5618	1.19869	46.6294	1.10292	64.7746	0.46939	172.223	0.34309	173.495	0.29036	172.386	0.22912	130.591	0.1536	130.015	0.10757
57.3113	2.57573	3.4845	1.19824	46.1955	1.10176	64.465	0.46946	172.531	0.34322	173.805	0.29047	172.694	0.2292	130.283	0.15355	129.708	0.10754
56.9281	2.57445	3.4117	1.19771	45.7084	1.10047	64.1658	0.46954	172.839	0.34335	174.115	0.29058	173.002	0.22928	129.975	0.1535	129.401	0.1075
56.5529	2.57327	3.359	1.19743	45.2214	1.0992	63.8762	0.46959	173.147	0.34347	174.425	0.2907	173.311	0.22937	129.666	0.15345	129.094	0.10747
56.1748	2.57238	3.3082	1.1971	44.7525	1.09794	63.5788	0.46969	173.454	0.3436	174.736	0.29082	173.619	0.22946	129.358	0.15341	128.786	0.10743
55.7871	2.57087	3.2576	1.19682	44.2883	1.09654	63.2388	0.46972	173.762	0.34375	175.046	0.29099	173.927	0.22955	129.049	0.15336	128.479	0.10739
55.411	2.56965	3.2148	1.19655	43.8401	1.09509	62.9068	0.4699	174.07	0.3439	175.356	0.29117	174.235	0.22961	128.741	0.15331	128.172	0.10735
55.0132	2.56843	3.1801	1.19631	43.3581	1.09369	62.5976	0.46998	174.378	0.34405	175.666	0.29135	174.543	0.22966	128.432	0.15325	127.865	0.10731
54.6433	2.56719	3.1488	1.19609	42.8286	1.09232	62.2595	0.47009	174.686	0.34421	175.977	0.29153	174.851	0.22972	128.124	0.15318	127.558	0.10727
54.3114	2.56604	3.1098	1.19582	42.3006	1.09069	61.9065	0.47018	174.994	0.34438	176.287	0.29167	175.159	0.22981	127.816	0.15312	127.25	0.10723
53.947	2.56474	3.0755	1.19555	41.7949	1.08916	61.5888	0.47025	175.302	0.34454	176.597	0.29182	175.468	0.2299	127.507	0.15306	126.943	0.1072
53.5678	2.56346	3.0464	1.19534	41.2983	1.08751	61.2318	0.47038	175.61	0.34468	176.907	0.29197	175.776	0.22999	127.199	0.153	126.636	0.10716
53.1852	2.56231	3.0174	1.19526	40.793	1.08577	60.8865	0.47048	175.918	0.34482	177.218	0.29211	176.084	0.23009	126.89	0.15294	126.329	0.10712
52.7821	2.56119	2.9994	1.19515	40.2562	1.08414	60.5203	0.47058	176.226	0.34496	177.528	0.29227	176.392	0.23019	126.582	0.15289	126.022	0.10708
52.4316	2.5597	2.9932	1.19521	39.6925	1.08229	60.1641	0.4707	176.534	0.34512	177.838	0.29243	176.7	0.23029	126.274	0.15283	125.714	0.10704
52.0044	2.55866	3.0093	1.19547	39.101	1.08037	59.8387	0.47079	176.842	0.34528	178.148	0.29259	177.008	0.23034	125.965	0.15278	125.407	0.107
51.5511	2.55693	3.069	1.19589	38.5566	1.07843	59.5286	0.47095	177.15	0.34543	178.458	0.29275	177.316	0.23039	125.657	0.15273	125.1	0.10697
51.1861	2.55573	3.1217	1.19616	38.0237	1.07635	59.1967	0.47104	177.458	0.34559	178.769	0.29289	177.624	0.23044	125.348	0.15268	124.793	0.10693
50.7557	2.55396	3.153	1.19627	37.4223	1.07425	58.8417	0.47115	177.765	0.34576	179.079	0.29302	177.933	0.23051	125.04	0.15263	124.486	0.10689
50.3256	2.55254	3.1502	1.19611	36.7993	1.07212	58.5333	0.47129	178.073	0.34592	179.389	0.29314	178.241	0.23058	124.732	0.15258	124.178	0.10686
49.898	2.55115	3.1247	1.19594	36.1448	1.06972	58.1935	0.4714	178.381	0.34608	179.699	0.29327	178.549	0.23065	124.423	0.15253	123.871	0.10682
49.5129	2.54931	3.0815	1.19554	35.5422	1.06737	57.8527	0.47161	178.689	0.34624	180.01	0.29339	178.857	0.23072	124.115	0.15248	123.564	0.10679
49.0926	2.54771	3.0303	1.19525	34.9232	1.06471	57.4993	0.47173	178.997	0.3464	180.32	0.2935	179.165	0.2308	123.806	0.15243	123.257	0.10675
48.6676	2.5462	2.9883	1.19497	34.2681	1.06211	57.1441	0.47187	179.305	0.34655	180.63	0.29361	179.473	0.23087	123.498	0.15238	122.95	0.10672
48.2391	2.54464	2.9519	1.19473	33.5664	1.05938	56.7956	0.47203	179.613	0.3467	180.94	0.29372	179.781	0.23095	123.19	0.15233	122.642	0.10668
47.8167	2.54308	2.9265	1.19461	32.8236	1.05647	56.4546	0.47216	179.921	0.34685	181.25	0.29383	180.09	0.23103	122.881	0.15228	122.335	0.10665
47.4007	2.54105	2.9099	1.19449	32.1204	1.05332	56.0333	0.47234	180.229	0.34703	181.561	0.29395	180.398	0.23111	122.573	0.15223	122.028	0.10661
47	2.53945	2.9014	1.19445	31.368	1.05016	55.6821	0.47251	180.537	0.34721	181.871	0.29408	180.706	0.23116	122.264	0.15219	121.721	0.10658
46.5527	2.53687	2.8955	1.19432	30.5721	1.04675	55.2999	0.47265	180.845	0.34739	182.181	0.29421	181.014	0.23122	121.956	0.15214	121.414	0.10654
46.1032	2.535	2.8771	1.19419	29.7732	1.04321	54.9209	0.47284	181.153	0.3475	182.491	0.29433	181.322	0.23127	121.647	0.1521	121.106	0.10651
45.647	2.53312	2.8523	1.19406	28.9103	1.03934	54.5901	0.47296	181.461	0.34762	182.802	0.29445	181.63	0.23135	121.339	0.15204	120.799	0.10648
45.1614	2.53121	2.8398	1.1938	28.0195	1.03524	54.2499	0.47318	181.768	0.34774	183.112	0.29456	181.938	0.23143	121.031	0.15199	120.492	0.10644
44.7143	2.52942	2.7911	1.19356	27.0923	1.03087	53.889	0.47338	182.076	0.34789	183.422	0.29467	182.247	0.23151	120.722	0.15193	120.185	0.10641
44.2644	2.52723	2.7622	1.19336	26.1039	1.02614	53.5434	0.47356	182.384	0.34804	183.732	0.29478	182.555	0.23159	120.414	0.15188	119.878	0.10638
43.8114	2.52504	2.7369	1.1931	25.0811	1.02102	53.1858	0.47374	182.692	0.34819	184.042	0.29493	182.863	0.23167	120.105	0.15183	119.571	0.10634
43.3274	2.52296	2.7187	1.19305	23.9573	1.01548	52.7914	0.47392	183	0.34833	184.353	0.29511	183.171	0.23175	119.797	0.15178	119.263	0.10631
42.8416	2.52056	2.7034	1.19286	22.8828	1.00957	52.4205	0.47415	183.308	0.34847	184.663	0.29529	183.479	0.23182	119.489	0.15173	118.956	0.10627
42.3257	2.51849	2.6891	1.19275	21.5094	1.00316	52.0704	0.47436	183.616	0.34862	184.973	0.29547	183.787	0.23188	119.18	0.15168	118.649	0.10622
41.8329	2.51621	2.6771	1.19268	20.1319	0.99627	51.6627	0.47457	183.924	0.34875	185.283	0.29563	184.095	0.23195	118.872	0.15164	118.342	0.10618
41.3392	2.51381	2.6653	1.19264	18.6585	0.98872	51.2653	0.47481	184.232	0.34889	185.594	0.29577	184.404	0.23203	118.563	0.15159	118.035	0.10614
40.8435	2.51135	2.6528	1.19261	16.8969	0.98061	50.8787	0.47498	184.54	0.34903	185.904	0.29591	184.712	0.23211	118.255	0.15154	117.727	0.10611
40.3155	2.50883	2.6424	1.19245	15.32	0.97215	50.4398	0.47526	184.848	0.34918	186.214	0.29605	185.02	0.2322	117.947	0.15149	117.42	0.10608
39.7612	2.50593	2.629	1.19235	13.4871	0.96377	50.0546	0.47551	185.156	0.34935	186.524	0.29619	185.328	0.23229	117.638	0.15145	117.113	0.10604
39.1884	2.50338	2.618	1.19237	11.6235	0.95689	49.6429	0.47574	185.464	0.34951	186.835	0.29631	185.636	0.23238	117.33	0.1514	116.806	0.106
38.6636	2.5005	2.6099	1.19231	10.2926	0.95304	49.2566	0.47596	185.772	0.34966	187.145	0.29644	185.944	0.23246	117.021	0.15135	116.499	0.10597
38.1158	2.49748	2.5984	1.19221	9.4363	0.95018	48.8348	0.47624	186.079	0.34981	187.455	0.29656	186.252	0.23254	116.713	0.15129	116.191	0.10593
37.5642	2.49478	2.5826	1.19207	8.7464	0.94805	48.4597	0.47651	186.387	0.34996	187.765	0.29669	186.56	0.2326	116.405	0.15124	115.884	0.10589
36.966	2.49203	2.5732	1.19199	8.1564	0.94613	48.026	0.47679	186.695	0.35011	188.075	0.29684	186.869	0.23267	116.096	0.15119	115.577	0.10585
36.3455	2.48846	2.568	1.19194	7.6137	0.94434	47.638	0.47709	187.003	0.35026	188.386	0.297	187.177	0.23274	115.788	0.15114	115.27	0.10581
35.7255	2.48525	2.558	1.19193	7.0787	0.94301	47.2179	0.47736	187.311	0.3504	188.696	0.29716	187.485	0.23283	115.479	0.15109	114.963	0.10577
35.1649	2.48158	2.5512	1.19179	6.6892	0.94192	46.81	0.4777	187.619	0.35057	189.006	0.29732	187.793	0.23291	115.171	0.15105	114.655	0.10574
34.519	2.47805	2.5453	1.19174	6.3432	0.94113	46.3828	0.47797	187.927	0.35075	189.316	0.29745	188.101	0.233	114.862	0.151	114.348	0.1057
33.8302	2.47432	2.5411	1.19177	6.0528	0.94045	45.9372	0.47829	188.235	0.35092	189.627	0.29755	188.409	0.2331	114.554	0.15096	114.041	0.10566
33.1095	2.47025	2.5416	1.19176	5.7901	0.93971	45.4924	0.47865	188.543	0.35108	189.937	0.29766	188.717	0.23321	114.246	0.15091	113.734	0.10563
32.4258	2.46601	2.5447	1.19177	5.5056	0.93917	45.0371	0.47894	188.851	0.35124	190.247	0.29776	189.026	0.23331	113.937	0.15088	113.427	0.1056
31.6806	2.46168	2.5489	1.19188	5.2802	0.93857	44.6237	0.4793	189.159	0.35139	190.557	0.29788	189.334	0.23341	113.629	0.15084	113.119	0.10557
30.8819	2.45684	2.5554	1.19187	5.0706	0.938	44.1904	0.47968	189.467	0.35155	190.867	0.29802	189.642	0.2335	113.32	0.1508	112.812	0.10554
30.1089	2.4518	2.5627	1.19196	4.8773	0.93765	43.7685	0.48002	189.775	0.35172	191.178	0.29816	189.95	0.23358	113.012	0.15076	112.505	0.10551
29.2599	2.4467	2.5592	1.19183	4.7137	0.93731	43.2842	0.48041	190.082	0.35188	191.488	0.29829	190.258	0.23364	112.704	0.15071	112.198	0.10547
28.403	2.44119	2.5508	1.19186	4.547	0.93702	42.8265	0.48079	190.39	0.35202	191.798	0.29843	190.566	0.23371	112.395	0.15067	111.891	0.10544
27.4525	2.43504	2.5484	1.19177	4.4097	0.93667	42.3342	0.48117	190.698	0.35216	192.108	0.29858	190.874	0.23378	112.087	0.15063	111.584	0.1054
26.4886	2.42866	2.5453	1.19177	4.2751	0.93634	41.8464	0.48161	191.006	0.35229	192.419	0.29872	191.183	0.23386	111.778	0.15058	111.276	0.10536
25.4854	2.42163	2.544	1.19171	4.1541	0.936	41.3816	0.48201	191.314	0.35243	192.729	0.29887	191.491	0.23394	111.47	0.15054	110.969	0.10533
24.3662	2.41437	2.5442	1.19181	4.0426	0.93582	40.9144	0.48243	191.622	0.35257	193.039	0.29901	191.799	0.23402	111.162	0.15049	110.662	0.10529
23.2285	2.40626	2.5461	1.19182	3.9405	0.93557	40.4154	0.48289	191.93	0.35271	193.349	0.29912	192.107	0.23408	110.853	0.15044	110.355	0.10526
21.9504	2.39779	2.5458	1.19182	3.8445	0.93535	39.91	0.4834	192.238	0.35284	193.659	0.29922	192.415	0.23415	110.545	0.1504	110.048	0.10523
20.5612	2.38844	2.5458	1.19188	3.7574	0.93516	39.3667	0.48384	192.546	0.35297	193.97	0.29933	192.723	0.23422	110.236	0.15035	109.74	0.1052
19.0518	2.37827	2.5429	1.19176	3.6807	0.9351	38.8532	0.48436	192.854	0.3531	194.28	0.29943	193.031	0.23429	109.928	0.1503	109.433	0.10516
17.3945	2.36762	2.5389	1.19176	3.6098	0.93485	38.3291	0.48488	193.162	0.35325	194.59	0.29952	193.34	0.23436	109.62	0.15025	109.126	0.10513
15.5898	2.35669	2.5348	1.19164	3.5456	0.93473	37.8127	0.48545	193.47	0.35343	194.9	0.2996	193.648	0.23443	109.311	0.1502	108.819	0.1051
13.6529	2.34639	2.5336	1.19164	3.473	0.93458	37.2524	0.48599	193.778	0.3536	195.211	0.29968	193.956	0.2345	109.003	0.15016	108.512	0.10506
11.5645	2.33773	2.5323	1.19165	3.403	0.93439	36.6736	0.48661	194.085	0.35374	195.521	0.29977	194.264	0.23457	108.694	0.15011	108.204	0.10503
9.6567	2.33247	2.5307	1.19163	3.3499	0.93436	36.0621	0.48726	194.393	0.35386	195.831	0.29989	194.572	0.23464	108.386	0.15006	107.897	0.105
8.168	2.32974	2.5316	1.19165	3.3205	0.93441	35.5061	0.48786	194.701	0.35397	196.141	0.30004	194.88	0.23472	108.077	0.15	107.59	0.10496
7.0589	2.32792	2.5333	1.19169	3.3178	0.93442	34.9097	0.48854	195.009	0.35411	196.451	0.30019	195.188	0.23479	107.769	0.14995	107.283	0.10492
6.42138	2.32722	2.5357	1.1917	3.3341	0.93444	34.2839	0.48924	195.317	0.35426	196.762	0.30034	195.496	0.23487	107.461	0.1499	106.976	0.10489
5.89073	2.32656	2.54	1.19171	3.3453	0.93442	33.6369	0.48999	195.625	0.35441	197.072	0.30049	195.805	0.23497	107.152	0.14985	106.668	0.10485
5.45656	2.32649	2.5459	1.19182	3.3387	0.9344	32.9397	0.49076	195.933	0.35453	197.382	0.30064	196.113	0.23506	106.844	0.14981	106.361	0.10482
5.05805	2.32649	2.5504	1.19174	3.3134	0.93432	32.2847	0.49166	196.241	0.35463	197.692	0.30079	196.421	0.23515	106.535	0.14976	106.054	0.10478
4.70778	2.32676	2.5508	1.19178	3.2731	0.93431	31.5758	0.49255	196.549	0.35472	198.003	0.30093	196.729	0.23521	106.227	0.14971	105.747	0.10475
4.45399	2.32695	2.5528	1.19178	3.2256	0.93419	30.8278	0.49349	196.857	0.35484	198.313	0.30108	197.037	0.23527	105.919	0.14966	105.44	0.10471
4.21279	2.32736	2.5522	1.19175	3.1798	0.93411	30.0874	0.4945	197.165	0.355	198.623	0.3012	197.345	0.23533	105.61	0.14962	105.132	0.10467
4.05548	2.32782	2.552	1.19182	3.1325	0.93393	29.2985	0.49561	197.473	0.35515	198.933	0.30133	197.653	0.23539	105.302	0.14957	104.825	0.10464
3.90027	2.32816	2.5526	1.1918	3.0832	0.93383	28.5104	0.49674	197.781	0.35531	199.244	0.30146	197.962	0.23544	104.993	0.14953	104.518	0.1046
3.75555	2.32862	2.5566	1.19184	3.0342	0.93373	27.629	0.49801	198.089	0.35547	199.554	0.30159	198.27	0.2355	104.685	0.14949	104.211	0.10456
3.62131	2.32902	2.5623	1.19187	2.9892	0.9337	26.7493	0.49938	198.396	0.35563	199.864	0.30172	198.578	0.23558	104.377	0.14945	103.904	0.10453
3.48917	2.32941	2.5688	1.19196	2.9505	0.93367	25.7957	0.50094	198.704	0.3558	200.174	0.30186	198.886	0.23566	104.068	0.14941	103.596	0.10449
3.41576	2.32975	2.5748	1.19207	2.9129	0.93365	24.7981	0.50261	199.012	0.35597	200.484	0.302	199.194	0.23573	103.76	0.14937	103.289	0.10446
3.26055	2.33021	2.5802	1.19199	2.8802	0.93356	23.7442	0.50445	199.32	0.35613	200.795	0.30214	199.502	0.23579	103.451	0.14933	102.982	0.10443
3.19973	2.33035	2.5823	1.19203	2.8474	0.9334	22.6257	0.50657	199.628	0.35629	201.105	0.30227	199.81	0.23585	103.143	0.14929	102.675	0.10439
3.1389	2.33074	2.5826	1.19202	2.8162	0.93347	21.3875	0.5089	199.936	0.35643	201.415	0.30241	200.119	0.23592	102.835	0.14925	102.368	0.10436
3.055	2.33094	2.6087	1.19252	2.785	0.9334	20.0682	0.51158	200.244	0.35656	201.725	0.30254	200.427	0.23599	102.526	0.14921	102.061	0.10433
3.0379	2.33127	2.6836	1.19296	2.7607	0.93336	18.6551	0.5146	200.552	0.35669	202.036	0.30268	200.735	0.23606	102.218	0.14917	101.753	0.10431
2.9914	2.3313	2.7327	1.19335	2.7393	0.93335	17.1182	0.51807	200.86	0.35682	202.346	0.30281	201.043	0.23614	101.909	0.14913	101.446	0.10427
2.84946	2.33181	2.7948	1.1939	2.7199	0.93336	15.489	0.5221	201.168	0.35695	202.656	0.30292	201.351	0.2362	101.601	0.14909	101.139	0.10424
2.9233	2.3314	2.8489	1.19428	2.6974	0.93326	13.7523	0.52655	201.476	0.35708	202.966	0.30303	201.659	0.23627	101.292	0.14906	100.832	0.1042
2.78863	2.33207	2.9027	1.19466	2.6759	0.93325	11.9195	0.53121	201.784	0.3572	203.276	0.30315	201.967	0.23634	100.984	0.14903	100.525	0.10417
2.69215	2.33234	2.948	1.19489	2.6565	0.93317	10.6079	0.53412	202.092	0.35731	203.587	0.30326	202.276	0.23642	100.676	0.14899	100.217	0.10413
2.58308	2.33267	2.9838	1.19511	2.6396	0.93326	9.8127	0.53582	202.399	0.35745	203.897	0.3034	202.584	0.23649	100.367	0.14896	99.9102	0.1041
2.53484	2.33294	3.0173	1.19543	2.6267	0.93322	9.3899	0.53672	202.707	0.35762	204.207	0.30353	202.892	0.23657	100.059	0.14893	99.603	0.10407
2.4027	2.33333	3.0579	1.19572	2.6118	0.93319	9.0469	0.53764	203.015	0.35779	204.517	0.30367	203.2	0.23663	99.7504	0.14888	99.2958	0.10404
2.29364	2.33386	3.1125	1.1961	2.5945	0.9332	8.7215	0.53862	203.323	0.35795	204.828	0.3038	203.508	0.23669	99.442	0.14883	98.9886	0.104
2.1615	2.33427	3.1638	1.19647	2.5804	0.93313	8.311	0.53974	203.631	0.35809	205.138	0.30393	203.816	0.23676	99.1336	0.14879	98.6814	0.10397
2.02936	2.33466	3.2004	1.19673	2.5682	0.93314	7.8953	0.54086	203.939	0.35822	205.448	0.30406	204.124	0.23684	98.8252	0.14874	98.3742	0.10394
1.89722	2.33513	3.236	1.19694	2.5577	0.93295	7.5424	0.54186	204.247	0.35837	205.758	0.30419	204.433	0.23693	98.5168	0.1487	98.067	0.10391
		3.2516	1.197	2.548	0.93281	7.1354	0.54288	204.555	0.35853	206.068	0.30432	204.741	0.23702	98.2084	0.14865	97.7598	0.10388
		3.2485	1.19692	2.5401	0.93284	6.8194	0.54376	204.863	0.35869	206.379	0.30445	205.049	0.23709	97.9	0.14861	97.4526	0.10384
		3.2383	1.19675	2.5339	0.93282	6.5081	0.54452	205.171	0.35884	206.689	0.30457	205.357	0.23716	97.5916	0.14856	97.1454	0.10381
		3.2228	1.19671	2.5225	0.93274	6.2171	0.54521	205.479	0.35899	206.999	0.30469	205.665	0.23723	97.2832	0.14852	96.8382	0.10378
		3.2002	1.19647	2.5112	0.93285	5.9715	0.54577	205.787	0.35913	207.309	0.30481	205.973	0.23728	96.9748	0.14848	96.531	0.10375
		3.1539	1.196	2.4995	0.93279	5.7276	0.54633	206.095	0.35927	207.62	0.30494	206.281	0.23734	96.6663	0.14843	96.2239	0.10372
		3.077	1.19551	2.4878	0.93281	5.4573	0.54694	206.402	0.35941	207.93	0.30506	206.589	0.23739	96.3579	0.14839	95.9167	0.10369
		3.0129	1.19504	2.4763	0.93285	5.2634	0.54732	206.71	0.35955	208.24	0.30519	206.898	0.23746	96.0495	0.14835	95.6095	0.10365
		2.9574	1.1947	2.4652	0.9329	5.0587	0.54771	207.018	0.3597	208.55	0.30532	207.206	0.23754	95.7411	0.14831	95.3023	0.10362
		2.8998	1.19424	2.4549	0.93291	4.8591	0.54806	207.326	0.35985	208.861	0.30545	207.514	0.23761	95.4327	0.14827	94.9951	0.10359
		2.8544	1.19407	2.4454	0.93288	4.6951	0.54834	207.634	0.36	209.171	0.3056	207.822	0.23766	95.1243	0.14823	94.6879	0.10356
		2.8433	1.19397	2.4368	0.9328	4.5322	0.54849	207.942	0.36014	209.481	0.30575	208.13	0.2377	94.8159	0.14819	94.3807	0.10353
		2.8001	1.19361	2.4285	0.93274	4.4019	0.54865	208.25	0.36027	209.791	0.3059	208.438	0.23774	94.5075	0.14815	94.0735	0.10349
		2.7616	1.19328	2.4212	0.93284	4.274	0.54883	208.558	0.3604	210.101	0.30605	208.746	0.23779	94.1991	0.14812	93.7663	0.10345
		2.7295	1.19313	2.4161	0.93282	4.1518	0.54895	208.866	0.36052	210.412	0.30617	209.055	0.23784	93.8907	0.14808	93.4591	0.10342
		2.7033	1.19279	2.4174	0.93286	4.0423	0.54906	209.174	0.36067	210.722	0.30629	209.363	0.2379	93.5823	0.14804	93.1519	0.10339
		2.6812	1.19268	2.4182	0.93277	3.9378	0.54917	209.482	0.36082	211.032	0.30641	209.671	0.23795	93.2738	0.14801	92.8447	0.10336
		2.665	1.19266	2.4186	0.93279	3.8387	0.54919	209.79	0.36096	211.342	0.30653	209.979	0.23802	92.9654	0.14797	92.5375	0.10333
		2.7002	1.193	2.4206	0.9327	3.7408	0.54923	210.098	0.36111	211.653	0.30665	210.287	0.23808	92.657	0.14793	92.2304	0.1033
		2.7259	1.19318	2.4227	0.93293	3.654	0.54932	210.406	0.36125	211.963	0.30678	210.595	0.23815	92.3486	0.14789	91.9232	0.10327
		2.7256	1.19309	2.426	0.9328	3.5789	0.54938	210.713	0.36139	212.273	0.3069	210.903	0.23822	92.0402	0.14785	91.616	0.10323
		2.7285	1.19323	2.4297	0.93286	3.5118	0.5494	211.021	0.36151	212.583	0.30703	211.212	0.23829	91.7318	0.14781	91.3088	0.1032
		2.7483	1.19328	2.4323	0.93277	3.4408	0.54941	211.329	0.36163	212.893	0.30714	211.52	0.23835	91.4234	0.14777	91.0016	0.10317
		2.7524	1.19333	2.4341	0.93273	3.3583	0.54944	211.637	0.36175	213.204	0.30724	211.828	0.23841	91.115	0.14774	90.6944	0.10313
		2.7476	1.19319	2.4355	0.93267	3.2815	0.5494	211.945	0.36188	213.514	0.30735	212.136	0.23846	90.8066	0.14771	90.3872	0.1031
		2.7367	1.19311	2.4375	0.93271	3.2271	0.54942	212.253	0.36202	213.824	0.30745	212.444	0.23851	90.4982	0.14768	90.08	0.10306
		2.7243	1.19297	2.4388	0.93282	3.1876	0.54939	212.561	0.36215	214.134	0.30757	212.752	0.23855	90.1898	0.14765	89.7728	0.10303
		2.7123	1.1929	2.4393	0.93274	3.1594	0.54936	212.869	0.36229	214.445	0.30772	213.06	0.2386	89.8813	0.14761	89.4656	0.103
		2.693	1.19273	2.4406	0.93287	3.1165	0.54932	213.177	0.36243	214.755	0.30788	213.369	0.23865	89.5729	0.14757	89.1584	0.10296
		2.6764	1.1926	2.4396	0.93266	3.0752	0.54936	213.485	0.36257	215.065	0.30803	213.677	0.23872	89.2645	0.14752	88.8512	0.10292
		2.6571	1.19244	2.4332	0.93278	3.0206	0.54933	213.793	0.36271	215.375	0.30817	213.985	0.23878	88.9561	0.14748	88.544	0.10288
		2.6443	1.1924	2.423	0.93278	2.9752	0.54929	214.101	0.36284	215.685	0.3083	214.293	0.23885	88.6477	0.14744	88.2368	0.10284
		2.6355	1.19235	2.4153	0.93278	2.9368	0.54924	214.409	0.36297	215.996	0.30842	214.601	0.23893	88.3393	0.14739	87.9296	0.10281
		2.6234	1.19227	2.3992	0.93267	2.9085	0.54915	214.716	0.36311	216.306	0.30855	214.909	0.239	88.0309	0.14735	87.6225	0.10278
		2.6095	1.19218	2.3872	0.9327	2.8874	0.54919	215.024	0.36325	216.616	0.30867	215.217	0.23906	87.7225	0.1473	87.3153	0.10276
		2.6003	1.19213	2.3764	0.93265	2.865	0.54914	215.332	0.36339	216.926	0.3088	215.525	0.23912	87.4141	0.14726	87.0081	0.10273
		2.5917	1.19205	2.3671	0.9327	2.836	0.5491	215.64	0.36353	217.237	0.30892	215.834	0.23917	87.1057	0.14722	86.7009	0.10271
		2.5839	1.192	2.3584	0.93274	2.8224	0.54912	215.948	0.36367	217.547	0.30905	216.142	0.23923	86.7973	0.14718	86.3937	0.10268
		2.5778	1.19195	2.3504	0.93266	2.8005	0.54905	216.256	0.36381	217.857	0.30917	216.45	0.23929	86.4888	0.14715	86.0865	0.10265
		2.5709	1.19186	2.3443	0.93273	2.7805	0.54901	216.564	0.36394	218.167	0.3093	216.758	0.23935	86.1804	0.14711	85.7793	0.10263
		2.5601	1.1918	2.3377	0.9327	2.7564	0.54907	216.872	0.36407	218.477	0.30942	217.066	0.23941	85.872	0.14708	85.4721	0.1026
		2.5514	1.19172	2.3329	0.93256	2.7428	0.54902	217.18	0.36419	218.788	0.30954	217.374	0.23948	85.5636	0.14705	85.1649	0.10257
		2.5418	1.19159	2.329	0.93259	2.7289	0.54898	217.488	0.36431	219.098	0.30966	217.682	0.23954	85.2552	0.14702	84.8577	0.10254
		2.5317	1.19155	2.3252	0.93257	2.7089	0.54896	217.796	0.36442	219.408	0.30979	217.991	0.2396	84.9468	0.14699	84.5505	0.1025
		2.5235	1.19149	2.3194	0.93258	2.6914	0.54895	218.104	0.36453	219.718	0.30991	218.299	0.23965	84.6384	0.14696	84.2433	0.10247
		2.5143	1.19142	2.3148	0.9326	2.6766	0.54899	218.412	0.36464	220.029	0.31004	218.607	0.2397	84.33	0.14693	83.9361	0.10243
		2.5066	1.19138	2.3095	0.93258	2.6575	0.54895	218.719	0.36476	220.339	0.31017	218.915	0.23975	84.0216	0.14689	83.6289	0.1024
		2.5015	1.19135	2.3043	0.93271	2.6568	0.54898	219.027	0.36487	220.649	0.31029	219.223	0.2398	83.7132	0.14685	83.3217	0.10237
		2.4926	1.19126	2.3007	0.93278	2.6538	0.54886	219.335	0.36501	220.959	0.31041	219.531	0.23984	83.4048	0.14681	83.0146	0.10233
		2.4837	1.19123	2.2974	0.9328	2.6397	0.54887	219.643	0.36515	221.27	0.31052	219.839	0.23989	83.0964	0.14677	82.7074	0.1023
		2.4785	1.19116	2.295	0.93276	2.5995	0.54878	219.951	0.3653	221.58	0.31064	220.148	0.23993	82.7879	0.14673	82.4002	0.10227
		2.4734	1.19109	2.2928	0.93279	2.5661	0.54864	220.259	0.36544	221.89	0.31076	220.456	0.23997	82.4795	0.1467	82.093	0.10224
		2.467	1.19103	2.2924	0.9327	2.5446	0.54858	220.567	0.36558	222.2	0.31086	220.764	0.24002	82.1711	0.14666	81.7858	0.10222
		2.4592	1.191	2.2931	0.93259	2.518	0.54852	220.875	0.36572	222.51	0.31096	221.072	0.24008	81.8627	0.14663	81.4786	0.1022
		2.4524	1.191	2.2947	0.9327	2.489	0.54853	221.183	0.36584	222.821	0.31106	221.38	0.24013	81.5543	0.14659	81.1714	0.10217
		2.4462	1.19096	2.2976	0.93252	2.4565	0.54844	221.491	0.36595	223.131	0.31116	221.688	0.24019	81.2459	0.14656	80.8642	0.10214
		2.4391	1.19092	2.3001	0.93252	2.426	0.54834	221.799	0.36607	223.441	0.31128	221.996	0.24026	80.9375	0.14652	80.557	0.10211
		2.4335	1.1909	2.2957	0.93249	2.4037	0.54833	222.107	0.36619	223.751	0.3114	222.305	0.24032	80.6291	0.14649	80.2498	0.10207
		2.4321	1.19084	2.2895	0.9325	2.3702	0.54825	222.415	0.36631	224.062	0.31152	222.613	0.24039	80.3207	0.14646	79.9426	0.10204
		2.4333	1.19089	2.2817	0.93254	2.3408	0.54817	222.723	0.36643	224.372	0.31165	222.921	0.24046	80.0123	0.14642	79.6354	0.10201
		2.4328	1.19078	2.2734	0.93252	2.3314	0.5482	223.03	0.36656	224.682	0.31176	223.229	0.24052	79.7039	0.14638	79.3282	0.10198
		2.4304	1.19085	2.2606	0.9325	2.3154	0.54815	223.338	0.36669	224.992	0.31186	223.537	0.24059	79.3954	0.14634	79.0211	0.10195
		2.4256	1.19076	2.2485	0.93247	2.2883	0.54805	223.646	0.36682	225.302	0.31196	223.845	0.24065	79.087	0.1463	78.7139	0.10192
		2.4203	1.19074	2.2361	0.93265	2.2607	0.54804	223.954	0.36695	225.613	0.31206	224.153	0.24071	78.7786	0.14626	78.4067	0.10189
		2.4154	1.19064	2.2242	0.93264	2.2317	0.54787	224.262	0.36708	225.923	0.31216	224.462	0.24077	78.4702	0.14623	78.0995	0.10186
		2.411	1.1907	2.2136	0.93273	2.2028	0.54777	224.57	0.36721	226.233	0.31227	224.77	0.24083	78.1618	0.14619	77.7923	0.10184
		2.4102	1.19072	2.2087	0.93265	2.1877	0.54764	224.878	0.36734	226.543	0.31238	225.078	0.24088	77.8534	0.14615	77.4851	0.10181
		2.4088	1.1907	2.2004	0.93255	2.1805	0.54767	225.186	0.36746	226.854	0.31249	225.386	0.24094	77.545	0.14612	77.1779	0.10178
		2.4102	1.19069	2.1945	0.93261	2.1843	0.54773	225.494	0.36759	227.164	0.3126	225.694	0.24099	77.2366	0.14608	76.8707	0.10176
		2.4126	1.19071	2.1882	0.93255	2.1894	0.54776	225.802	0.36772	227.474	0.31272	226.002	0.24105	76.9282	0.14605	76.5635	0.10173
		2.4184	1.19076	2.1852	0.93253	2.1964	0.54777	226.11	0.36784	227.784	0.31285	226.31	0.2411	76.6198	0.14601	76.2563	0.10171
		2.42	1.19081	2.1817	0.93243	2.203	0.54774	226.418	0.36797	228.094	0.31297	226.618	0.24118	76.3114	0.14598	75.9491	0.10169
		2.4214	1.19072	2.1764	0.93253	2.2104	0.54776	226.726	0.36811	228.405	0.31309	226.927	0.24125	76.0029	0.14594	75.6419	0.10166
		2.4197	1.19078	2.1725	0.93247	2.2278	0.54783	227.033	0.36824	228.715	0.3132	227.235	0.24133	75.6945	0.14591	75.3347	0.10163
		2.4188	1.19062	2.1707	0.9325	2.228	0.54789	227.341	0.36838	229.025	0.31331	227.543	0.24136	75.3861	0.14589	75.0275	0.1016
		2.4172	1.19071	2.1661	0.93247	2.2234	0.54782	227.649	0.36851	229.335	0.31343	227.851	0.24139	75.0777	0.14586	74.7203	0.10158
		2.4106	1.19068	2.1625	0.93251	2.2171	0.54783	227.957	0.36862	229.646	0.31354	228.159	0.24142	74.7693	0.14584	74.4132	0.10155
		2.4035	1.19062	2.1613	0.93248	2.2173	0.54783	228.265	0.36873	229.956	0.31363	228.467	0.24147	74.4609	0.14582	74.106	0.10152
		2.3986	1.1906	2.1591	0.93259	2.2056	0.5478	228.573	0.36885	230.266	0.31372	228.775	0.24152	74.1525	0.14578	73.7988	0.10149
		2.3932	1.19051	2.1533	0.93248	2.1917	0.54774	228.881	0.36899	230.576	0.3138	229.084	0.24157	73.8441	0.14574	73.4916	0.10147
		2.385	1.19047	2.1497	0.93249	2.1871	0.54772	229.189	0.36912	230.887	0.31389	229.392	0.24163	73.5357	0.1457	73.1844	0.10144
		2.3809	1.19042	2.1467	0.93251	2.1812	0.54774	229.497	0.36926	231.197	0.31399	229.7	0.24168	73.2273	0.14566	72.8772	0.10142
		2.3773	1.19048	2.1432	0.93248	2.1787	0.54766	229.805	0.3694	231.507	0.31411	230.008	0.24173	72.9189	0.14563	72.57	0.1014
		2.3739	1.19043	2.1395	0.93262	2.1801	0.54756	230.113	0.36953	231.817	0.31423	230.316	0.24181	72.6105	0.1456	72.2628	0.10139
		2.3713	1.19036	2.1361	0.93251	2.1792	0.54769	230.421	0.36966	232.127	0.31436	230.624	0.24189	72.302	0.14557	71.9556	0.10137
		2.3633	1.19031	2.1324	0.93251	2.1705	0.54763	230.729	0.36977	232.438	0.31447	230.932	0.24196	71.9936	0.14554	71.6484	0.10135
		2.3601	1.19029	2.1306	0.93251	2.1572	0.54755	231.036	0.36989	232.748	0.31457	231.241	0.24202	71.6852	0.14551	71.3412	0.10133
		2.3625	1.19031	2.1299	0.93248	2.1472	0.54752	231.344	0.37001	233.058	0.31467	231.549	0.24207	71.3768	0.14548	71.034	0.10131
		2.3664	1.19041	2.1288	0.93245	2.1458	0.54758	231.652	0.37014	233.368	0.31477	231.857	0.24213	71.0684	0.14546	70.7268	0.10128
		2.3722	1.19037	2.1289	0.93245	2.1442	0.54753	231.96	0.37028	233.679	0.31487	232.165	0.24218	70.76	0.14543	70.4197	0.10126
		2.3755	1.19044	2.1279	0.93247	2.1481	0.54758	232.268	0.37039	233.989	0.31498	232.473	0.24223	70.4516	0.14541	70.1124	0.10123
		2.3777	1.19045	2.1282	0.93251	2.1489	0.54757	232.576	0.37047	234.299	0.31509	232.781	0.24228	70.1432	0.14538	69.8053	0.10121
		2.3789	1.19043	2.1294	0.93242	2.1497	0.54768	232.884	0.37054	234.609	0.3152	233.089	0.24234	69.8348	0.14535	69.4981	0.10118
		2.3784	1.19042	2.1299	0.93246	2.1576	0.54769	233.192	0.37063	234.919	0.31531	233.398	0.2424	69.5264	0.14532	69.1909	0.10115
		2.3785	1.19038	2.1285	0.93248	2.1621	0.54763	233.5	0.37076	235.23	0.31542	233.706	0.24246	69.218	0.14529	68.8837	0.10112
		2.3772	1.19042	2.1281	0.93252	2.1528	0.54756	233.808	0.37089	235.54	0.31553	234.014	0.24253	68.9095	0.14526	68.5765	0.10109
		2.3761	1.19042	2.1278	0.93246	2.1379	0.54754	234.116	0.37101	235.85	0.31565	234.322	0.2426	68.6011	0.14524	68.2693	0.10107
		2.3745	1.19032	2.1297	0.93254	2.1233	0.54752	234.424	0.37113	236.16	0.31576	234.63	0.24267	68.2927	0.14521	67.9621	0.10104
		2.3722	1.19038	2.1291	0.93253	2.1172	0.54746	234.732	0.37125	236.471	0.31587	234.938	0.24273	67.9843	0.14519	67.6549	0.10102
		2.3715	1.1904	2.1262	0.93248	2.1124	0.54743	235.04	0.37136	236.781	0.31597	235.246	0.24278	67.6759	0.14517	67.3477	0.10099
		2.3676	1.19024	2.1259	0.93247	2.1032	0.54741	235.347	0.37148	237.091	0.31608	235.554	0.24283	67.3675	0.14514	67.0405	0.10097
		2.3638	1.19033	2.1275	0.93254	2.0978	0.54741	235.655	0.37159	237.401	0.31618	235.863	0.24288	67.0591	0.14512	66.7333	0.10095
		2.3615	1.19024	2.1309	0.93243	2.0924	0.54742	235.963	0.37171	237.711	0.31629	236.171	0.24293	66.7507	0.14509	66.4261	0.10093
		2.3602	1.19018	2.1352	0.93247	2.0792	0.54731	236.271	0.37183	238.022	0.3164	236.479	0.24298	66.4423	0.14507	66.1189	0.10091
		2.3561	1.19023	2.1381	0.93255	2.0675	0.54726	236.579	0.37195	238.332	0.31651	236.787	0.24305	66.1339	0.14504	65.8118	0.10089
		2.3512	1.19017	2.1454	0.93248	2.0563	0.54719	236.887	0.37207	238.642	0.31662	237.095	0.24315	65.8255	0.14502	65.5046	0.10088
		2.3448	1.19008	2.1527	0.93255	2.049	0.54719	237.195	0.37218	238.952	0.31673	237.403	0.24324	65.517	0.14499	65.1974	0.10086
		2.3384	1.19008	2.1518	0.93252	2.0386	0.54719	237.503	0.37228	239.263	0.31682	237.711	0.24332	65.2086	0.14496	64.8902	0.10084
		2.3346	1.19006	2.1442	0.93251	2.0262	0.54713	237.811	0.37238	239.573	0.31692	238.02	0.24337	64.9002	0.14494	64.583	0.10082
		2.3327	1.19001	2.1339	0.93252	2.015	0.54713	238.119	0.37249	239.883	0.31701	238.328	0.24342	64.5918	0.14491	64.2758	0.10079
		2.3299	1.18998	2.1238	0.93253	2.0017	0.54709	238.427	0.3726	240.193	0.3171	238.636	0.24348	64.2834	0.14489	63.9686	0.10077
		2.3272	1.18995	2.1121	0.93262	1.9927	0.54701	238.735	0.37271	240.503	0.31719	238.944	0.24355	63.975	0.14486	63.6614	0.10074
		2.3252	1.18989	2.0975	0.93253	1.9853	0.54708	239.043	0.37286	240.814	0.31728	239.252	0.24361	63.6666	0.14484	63.3542	0.10072
		2.3236	1.18995	2.0872	0.93254	1.9821	0.54702	239.35	0.37301	241.124	0.31737	239.56	0.24367	63.3582	0.14482	63.047	0.1007
		2.323	1.1899	2.0728	0.93252	1.9815	0.54704	239.658	0.37316	241.434	0.31746	239.868	0.24371	63.0498	0.1448	62.7398	0.10068
		2.3241	1.18995	2.0601	0.93253	1.9869	0.54701	239.966	0.37329	241.744	0.31756	240.177	0.24375	62.7414	0.14477	62.4326	0.10066
		2.3267	1.18989	2.0474	0.93253	1.9908	0.54704	240.274	0.37341	242.055	0.31765	240.485	0.24379	62.433	0.14474	62.1254	0.10064
		2.3267	1.18996	2.0372	0.93251	1.9908	0.54703	240.582	0.37354	242.365	0.31775	240.793	0.24383	62.1245	0.14471	61.8182	0.10062
		2.3263	1.18993	2.0298	0.93243	1.9919	0.54716	240.89	0.37367	242.675	0.31784	241.101	0.24387	61.8161	0.14468	61.511	0.1006
		2.3235	1.18989	2.0259	0.93236	1.9947	0.54707	241.198	0.3738	242.985	0.31794	241.409	0.24392	61.5077	0.14466	61.2039	0.10058
		2.3179	1.18986	2.0162	0.93226	1.9955	0.54713	241.506	0.37393	243.296	0.31804	241.717	0.24398	61.1993	0.14464	60.8967	0.10056
		2.3133	1.18985	2.0136	0.93238	1.9908	0.54711	241.814	0.37404	243.606	0.31814	242.025	0.24404	60.8909	0.14463	60.5895	0.10053
		2.3076	1.18978	2.0085	0.93234	1.9847	0.54708	242.122	0.37415	243.916	0.31824	242.334	0.24415	60.5825	0.14462	60.2823	0.10051
		2.3034	1.18977	1.9999	0.93233	1.9789	0.54701	242.43	0.37426	244.226	0.31834	242.642	0.24432	60.2741	0.1446	59.9751	0.10049
		2.2966	1.1897	1.9973	0.93244	1.9725	0.54688	242.738	0.37437	244.536	0.31845	242.95	0.24449	59.9657	0.14457	59.6679	0.10047
		2.2871	1.18959	1.9919	0.9324	1.9748	0.547	243.046	0.37448	244.847	0.31855	243.258	0.24462	59.6573	0.14454	59.3607	0.10045
		2.2795	1.18957	1.9868	0.93239	1.9741	0.547	243.353	0.37459	245.157	0.31865	243.566	0.24464	59.3489	0.14451	59.0535	0.10043
		2.2745	1.18952	1.9781	0.93235	1.9703	0.54698	243.661	0.3747	245.467	0.31875	243.874	0.24466	59.0405	0.14449	58.7463	0.10041
		2.2744	1.18958	1.9735	0.93236	1.9684	0.54699	243.969	0.37481	245.777	0.31885	244.182	0.2447	58.7321	0.14446	58.4391	0.10039
		2.2796	1.18965	1.9677	0.93246	1.9686	0.547	244.277	0.37492	246.088	0.31895	244.491	0.24477	58.4236	0.14444	58.1319	0.10037
		2.287	1.18967	1.9615	0.93238	1.9666	0.54686	244.585	0.37501	246.398	0.31904	244.799	0.24483	58.1152	0.14442	57.8247	0.10035
		2.2938	1.18971	1.9577	0.93236	1.963	0.54695	244.893	0.3751	246.708	0.31914	245.107	0.24489	57.8068	0.1444	57.5175	0.10033
		2.3067	1.1899	1.9505	0.93238	1.9634	0.547	245.201	0.37519	247.018	0.31922	245.415	0.24494	57.4984	0.14439	57.2103	0.10031
		2.3301	1.19014	1.9468	0.93237	1.9668	0.54686	245.509	0.37532	247.328	0.31929	245.723	0.24498	57.19	0.14437	56.9031	0.10029
		2.3681	1.19051	1.9406	0.93221	1.9711	0.54696	245.817	0.37547	247.639	0.31936	246.031	0.24502	56.8816	0.14435	56.596	0.10027
		2.4117	1.19084	1.937	0.93227	1.9725	0.5469	246.125	0.37561	247.949	0.31943	246.339	0.24505	56.5732	0.14432	56.2888	0.10026
		2.4531	1.19108	1.9322	0.93227	1.9696	0.54698	246.433	0.3757	248.259	0.31952	246.647	0.24508	56.2648	0.1443	55.9816	0.10024
		2.4791	1.19115	1.9268	0.93222	1.9651	0.54698	246.741	0.37577	248.569	0.31965	246.956	0.24512	55.9564	0.14428	55.6744	0.10023
		2.4834	1.19115	1.9207	0.93231	1.9657	0.54698	247.049	0.37585	248.88	0.31977	247.264	0.24519	55.648	0.14428	55.3672	0.10022
		2.4861	1.1912	1.9166	0.93228	1.9708	0.54702	247.357	0.37591	249.19	0.3199	247.572	0.24527	55.3396	0.14427	55.06	0.1002
		2.4784	1.19113	1.9111	0.93227	1.9717	0.54697	247.664	0.37597	249.5	0.32001	247.88	0.24534	55.0311	0.14427	54.7528	0.10018
		2.4633	1.191	1.9038	0.93228	1.9668	0.547	247.972	0.37603	249.81	0.32012	248.188	0.24538	54.7227	0.14427	54.4456	0.10016
		2.4405	1.19078	1.8975	0.93229	1.96	0.54692	248.28	0.37612	250.12	0.32022	248.496	0.24542	54.4143	0.14426	54.1384	0.10014
		2.4133	1.19053	1.8922	0.93228	1.9606	0.54689	248.588	0.37622	250.431	0.32032	248.804	0.24546	54.1059	0.14425	53.8312	0.10012
		2.3866	1.19034	1.8866	0.93226	1.9598	0.54689	248.896	0.37632	250.741	0.32043	249.113	0.24553	53.7975	0.14423	53.524	0.1001
		2.3572	1.19008	1.8821	0.93235	1.9572	0.54689	249.204	0.37645	251.051	0.32049	249.421	0.24559	53.4891	0.14422	53.2168	0.10009
		2.3249	1.18977	1.8775	0.9323	1.9541	0.54687	249.512	0.3766	251.361	0.32056	249.729	0.24566	53.1807	0.1442	52.9096	0.10007
		2.2897	1.18955	1.8736	0.93231	1.954	0.54696	249.82	0.37674	251.672	0.32063	250.037	0.24572	52.8723	0.14419	52.6024	0.10005
		2.2519	1.18934	1.8693	0.93222	1.9519	0.54687	250.128	0.37684	251.982	0.32069	250.345	0.24579	52.5639	0.14417	52.2953	0.10004
		2.2142	1.18903	1.8653	0.93228	1.9524	0.54682	250.436	0.37692	252.292	0.32078	250.653	0.24585	52.2555	0.14415	51.9881	0.10002
		2.1814	1.18873			1.9526	0.54694	250.744	0.37701	252.602	0.32088	250.961	0.24593	51.947	0.14413	51.6809	0.1
		2.1522	1.18856			1.9545	0.54685	251.052	0.3771	252.912	0.32098	251.27	0.246	51.6386	0.14411	51.3737	0.09998
		2.1232	1.18838			1.9578	0.54694	251.36	0.3772	253.223	0.32108	251.578	0.24607	51.3302	0.1441	51.0665	0.09997
		2.0967	1.18817			1.9623	0.54691	251.667	0.37729	253.533	0.32116	251.886	0.24611	51.0218	0.1441	50.7593	0.09996
		2.0739	1.1879			1.9657	0.54695	251.975	0.3774	253.843	0.32124	252.194	0.24616	50.7134	0.14409	50.4521	0.09995
		2.0515	1.18784			1.9687	0.547	252.283	0.3775	254.153	0.32132	252.502	0.2462	50.405	0.14409	50.1449	0.09994
		2.0303	1.18775			1.9716	0.54711	252.591	0.37761	254.464	0.3214	252.81	0.24625	50.0966	0.14408	49.8377	0.09992
		2.0116	1.18754			1.9746	0.54697	252.899	0.37769	254.774	0.32148	253.118	0.2463	49.7882	0.14407	49.5305	0.09991
		1.9959	1.18748			1.9754	0.54706	253.207	0.37775	255.084	0.32157	253.427	0.24635	49.4798	0.14406	49.2233	0.0999
		1.9856	1.18742			1.9821	0.54715	253.515	0.37781	255.394	0.32166	253.735	0.24646	49.1714	0.14405	48.9161	0.09988
		1.9755	1.18739			1.9904	0.54713	253.823	0.37791	255.705	0.32175	254.043	0.24656	48.863	0.14404	48.6089	0.09987
		1.9664	1.1873			1.9985	0.5472	254.131	0.37803	256.015	0.32183	254.351	0.24667	48.5546	0.14403	48.3017	0.09985
		1.9585	1.18725			2.0101	0.54716	254.439	0.37816	256.325	0.32189	254.659	0.24673	48.2462	0.14402	47.9946	0.09984
		1.9498	1.18722			2.0277	0.54723	254.747	0.37827	256.635	0.32195	254.967	0.24679	47.9377	0.14401	47.6874	0.09983
		1.941	1.18716			2.0401	0.54728	255.055	0.37837	256.945	0.32201	255.275	0.24685	47.6293	0.14401	47.3802	0.09982
		1.9333	1.1871			2.0477	0.54721	255.363	0.37846	257.256	0.32208	255.584	0.24689	47.3209	0.144	47.073	0.0998
		1.9266	1.18708			2.0534	0.54738	255.671	0.37855	257.566	0.32215	255.892	0.24692	47.0125	0.14399	46.7658	0.09979
		1.9192	1.18698			2.0652	0.54736	255.978	0.37863	257.876	0.32222	256.2	0.24695	46.7041	0.14398	46.4586	0.09978
		1.9121	1.18695			2.0867	0.54736	256.286	0.37871	258.186	0.32229	256.508	0.247	46.3957	0.14397	46.1514	0.09977
		1.9058	1.18694			2.1044	0.54745	256.594	0.3788	258.497	0.32236	256.816	0.24705	46.0873	0.14397	45.8442	0.09976
		1.9019	1.18683			2.113	0.54751	256.902	0.37891	258.807	0.32242	257.124	0.24711	45.7789	0.14396	45.537	0.09976
		1.8971	1.18683			2.1153	0.54755	257.21	0.37902	259.117	0.32247	257.432	0.24717	45.4705	0.14394	45.2298	0.09975
		1.8925	1.1868			2.1118	0.54742	257.518	0.37911	259.427	0.32252	257.74	0.24723	45.1621	0.14393	44.9226	0.09974
		1.8879	1.1868			2.1091	0.5474	257.826	0.37919	259.737	0.32258	258.049	0.24729	44.8537	0.14392	44.6154	0.09973
		1.8859	1.18672			2.1031	0.54747	258.134	0.37926	260.048	0.32264	258.357	0.24735	44.5452	0.14391	44.3082	0.09972
		1.8843	1.18673			2.097	0.54746	258.442	0.37935	260.358	0.32273	258.665	0.24741	44.2368	0.14391	44.001	0.09971
		1.8817	1.18666			2.0906	0.54738	258.75	0.37946	260.668	0.32282	258.973	0.24747	43.9284	0.1439	43.6939	0.0997
		1.8788	1.18668			2.079	0.54735	259.058	0.37957	260.978	0.32291	259.281	0.24752	43.62	0.1439	43.3867	0.09968
		1.8757	1.18664			2.0725	0.54738	259.366	0.37969	261.289	0.323	259.589	0.24756	43.3116	0.1439	43.0795	0.09966
		1.8721	1.18664			2.069	0.54735	259.674	0.37983	261.599	0.3231	259.897	0.24761	43.0032	0.1439	42.7723	0.09966
		1.8686	1.18663			2.0699	0.54736	259.981	0.37996	261.909	0.32319	260.206	0.24768	42.6948	0.1439	42.4651	0.09965
		1.8657	1.18661			2.0769	0.54726	260.289	0.38008	262.219	0.32328	260.514	0.24777	42.3864	0.14391	42.1579	0.09965
		1.8616	1.18656			2.0673	0.54731	260.597	0.38017	262.529	0.32337	260.822	0.24785	42.078	0.14391	41.8507	0.09964
		1.8585	1.18653			2.0549	0.54726	260.905	0.38025	262.84	0.32343	261.13	0.24792	41.7696	0.14391	41.5435	0.09963
		1.8566	1.18652			2.0354	0.54722	261.213	0.38035	263.15	0.32348	261.438	0.24797	41.4612	0.14391	41.2363	0.09963
		1.8541	1.18651			2.0237	0.54719	261.521	0.38047	263.46	0.32353	261.746	0.24802	41.1527	0.1439	40.9291	0.09962
		1.8525	1.18646			2.0145	0.54711	261.829	0.38059	263.77	0.32359	262.054	0.24809	40.8443	0.1439	40.6219	0.09961
		1.8495	1.1865			2.0103	0.54713	262.137	0.38072	264.081	0.32368	262.363	0.24817	40.5359	0.14389	40.3147	0.0996
		1.8473	1.1865			2.0011	0.54706	262.445	0.38085	264.391	0.32378	262.671	0.24826	40.2275	0.14388	40.0075	0.09959
		1.8431	1.1865			1.9963	0.547	262.753	0.38098	264.701	0.32389	262.979	0.24833	39.9191	0.14389	39.7004	0.09958
		1.839	1.18648			1.9926	0.54707	263.061	0.3811	265.011	0.32399	263.287	0.24838	39.6107	0.1439	39.3931	0.09958
		1.8336	1.18644			1.9805	0.54696	263.369	0.38116	265.322	0.32407	263.595	0.24843	39.3023	0.14391	39.086	0.09957
		1.8287	1.18642			1.9662	0.54695	263.677	0.38123	265.632	0.32414	263.903	0.24848	38.9939	0.14393	38.7788	0.09956
		1.8252	1.18643			1.9533	0.54689	263.984	0.3813	265.942	0.3242	264.211	0.24854	38.6855	0.14393	38.4716	0.09956
		1.8229	1.18639			1.9393	0.54676	264.292	0.38143	266.252	0.32427	264.52	0.24859	38.3771	0.14394	38.1644	0.09956
		1.82	1.18634			1.9259	0.54666	264.6	0.38155	266.562	0.32434	264.828	0.24865	38.0686	0.14395	37.8572	0.09956
		1.8159	1.18628			1.9105	0.54669	264.908	0.38167	266.873	0.32443	265.136	0.2487	37.7602	0.14395	37.55	0.09956
		1.8122	1.18629			1.9022	0.54669	265.216	0.38175	267.183	0.32452	265.444	0.24876	37.4518	0.14396	37.2428	0.09956
		1.8094	1.18627			1.9079	0.54673	265.524	0.38182	267.493	0.32461	265.752	0.24882	37.1434	0.14396	36.9356	0.09955
		1.807	1.18626			1.9141	0.54673	265.832	0.3819	267.803	0.32471	266.06	0.24888	36.835	0.14396	36.6284	0.09955
		1.8031	1.18626			1.9153	0.54676	266.14	0.38199	268.114	0.32484	266.368	0.24895	36.5266	0.14396	36.3212	0.09955
		1.7995	1.18619			1.9072	0.54667	266.448	0.38209	268.424	0.32498	266.676	0.24903	36.2182	0.14396	36.014	0.09954
		1.798	1.18619			1.8943	0.54669	266.756	0.38219	268.734	0.32512	266.985	0.24914	35.9098	0.14396	35.7068	0.09955
		1.7966	1.18614			1.8858	0.54661	267.064	0.38234	269.044	0.32525	267.293	0.24925	35.6014	0.14397	35.3997	0.09955
		1.7958	1.18613			1.8806	0.54657	267.372	0.38249	269.354	0.32536	267.601	0.24934	35.293	0.14399	35.0924	0.09956
		1.7934	1.18621			1.8751	0.54657	267.68	0.38264	269.665	0.32547	267.909	0.24941	34.9846	0.14401	34.7853	0.09957
		1.7916	1.1861			1.8723	0.54658	267.988	0.38277	269.975	0.32558	268.217	0.24948	34.6761	0.14402	34.4781	0.09957
		1.7893	1.18614			1.8698	0.5466	268.295	0.3829	270.285	0.32569	268.525	0.24956	34.3678	0.14403	34.1709	0.09958
		1.7883	1.18609			1.8668	0.54655	268.603	0.38304	270.595	0.32579	268.833	0.24963	34.0593	0.14404	33.8637	0.09958
		1.7872	1.1861			1.8568	0.54647	268.911	0.38326	270.906	0.32589	269.142	0.24971	33.7509	0.14404	33.5565	0.09958
		1.7868	1.18611			1.8501	0.54645	269.219	0.38348	271.216	0.32599	269.45	0.24978	33.4425	0.14404	33.2493	0.09959
		1.786	1.18615			1.8432	0.54651	269.527	0.38369	271.526	0.32609	269.758	0.24986	33.1341	0.14405	32.9421	0.09959
		1.7865	1.18611			1.837	0.54642	269.835	0.38381	271.836	0.32619	270.066	0.24994	32.8257	0.14406	32.6349	0.0996
		1.7855	1.18607			1.8397	0.54642	270.143	0.38393	272.146	0.32628	270.374	0.25002	32.5173	0.14408	32.3277	0.09961
		1.7869	1.18618			1.8367	0.54637	270.451	0.38405	272.457	0.32638	270.682	0.25012	32.2089	0.1441	32.0205	0.09962
		1.7876	1.18611			1.8268	0.54642	270.759	0.38418	272.767	0.32648	270.99	0.25022	31.9005	0.14411	31.7133	0.09963
		1.7876	1.18611			1.8165	0.54631	271.067	0.38431	273.077	0.32657	271.299	0.25031	31.5921	0.14413	31.4061	0.09963
		1.7877	1.18619			1.8105	0.54633	271.375	0.38444	273.387	0.32664	271.607	0.25036	31.2837	0.14414	31.0989	0.09964
		1.7876	1.18615			1.8141	0.54637	271.683	0.38459	273.698	0.32672	271.915	0.25041	30.9752	0.14415	30.7918	0.09965
		1.7923	1.1862			1.8088	0.54635	271.991	0.38474	274.008	0.32679	272.223	0.25045	30.6668	0.14416	30.4846	0.09965
		1.799	1.18627			1.7994	0.54623	272.298	0.38489	274.318	0.32687	272.531	0.25045	30.3584	0.14417	30.1774	0.09966
		1.8096	1.1863			1.7957	0.54626	272.606	0.38502	274.628	0.32699	272.839	0.25045	30.05	0.14418	29.8702	0.09967
		1.8224	1.18637			1.796	0.54632	272.914	0.38516	274.938	0.32711	273.147	0.25047	29.7416	0.1442	29.563	0.09967
		1.8334	1.18648			1.7909	0.54629	273.222	0.38529	275.249	0.32723	273.456	0.25056	29.4332	0.14422	29.2558	0.09968
		1.8445	1.18648			1.7864	0.54624	273.53	0.38544	275.559	0.32735	273.764	0.25065	29.1248	0.14424	28.9486	0.09969
		1.8533	1.18655			1.7819	0.54628	273.838	0.3856	275.869	0.32746	274.072	0.25074	28.8164	0.14425	28.6414	0.0997
		1.8627	1.18648			1.7809	0.5462	274.146	0.38575	276.179	0.32757	274.38	0.2508	28.508	0.14427	28.3342	0.09971
		1.8743	1.1867			1.781	0.54622	274.454	0.38588	276.49	0.32768	274.688	0.25087	28.1996	0.14428	28.027	0.09972
		1.878	1.18668			1.7793	0.54624	274.762	0.38601	276.8	0.32779	274.996	0.25093	27.8912	0.14429	27.7198	0.09973
		1.8799	1.18671			1.7759	0.54613	275.07	0.38614	277.11	0.32793	275.304	0.25101	27.5828	0.1443	27.4126	0.09973
		1.8846	1.18672			1.774	0.54614	275.378	0.3863	277.42	0.32808	275.613	0.2511	27.2743	0.14431	27.1054	0.09974
		1.8879	1.18672			1.7713	0.54618	275.686	0.38647	277.731	0.32823	275.921	0.25118	26.9659	0.14431	26.7982	0.09975
		1.8876	1.18673			1.7714	0.54623	275.994	0.38664	278.041	0.32838	276.229	0.25119	26.6575	0.1443	26.4911	0.09974
		1.8839	1.18673			1.7705	0.54618	276.301	0.3867	278.351	0.3285	276.537	0.25121	26.3491	0.1443	26.1839	0.09973
		1.8815	1.1867			1.77	0.54618	276.609	0.38674	278.661	0.32856	276.845	0.25123	26.0407	0.14426	25.8767	0.09972
		1.877	1.18661			1.7716	0.54618	276.917	0.38678	278.971	0.32863	277.153	0.25131	25.7323	0.14425	25.5695	0.0997
		1.8723	1.18667			1.7747	0.5462	277.225	0.38691	279.282	0.32869	277.461	0.25138	25.4239	0.14419	25.2623	0.0996
		1.8668	1.18667			1.7765	0.54626	277.533	0.38708	279.592	0.32876	277.769	0.25145	25.1155	0.14413	24.9551	0.0995
		1.8615	1.18657			1.7756	0.54619	277.841	0.38724	279.902	0.32888	278.078	0.25163	24.8071	0.14407	24.6479	0.0994
		1.8575	1.18658			1.7762	0.54618	278.149	0.38739	280.212	0.32899	278.386	0.25181	24.4987	0.14398	24.3407	0.09919
		1.8553	1.18654			1.7767	0.5461	278.457	0.38754	280.523	0.32911	278.694	0.25199	24.1902	0.14378	24.0335	0.09892
		1.8562	1.18656			1.7789	0.54625	278.765	0.38769	280.833	0.32923	279.002	0.25208	23.8761	0.14338	23.7263	0.09865
		1.8593	1.18656			1.7801	0.54617	279.073	0.38783	281.143	0.32937	279.31	0.25216	23.5734	0.14277	23.4191	0.09828
		1.8639	1.18655			1.7802	0.54622	279.381	0.38796	281.453	0.32951	279.618	0.25224	23.265	0.14198	23.1119	0.09769
		1.8691	1.18661			1.7791	0.54619	279.689	0.38809	281.763	0.32964	279.926	0.25233	22.9753	0.14102	22.8047	0.09709
		1.8752	1.18663			1.7794	0.54625	279.997	0.38821	282.074	0.32978	280.235	0.25241	22.6482	0.13966	22.4975	0.0965
		1.8813	1.18671			1.7815	0.5462	280.305	0.38833	282.384	0.32988	280.543	0.25249	22.3398	0.13823	22.1903	0.09535
		1.8847	1.18671			1.78	0.54613	280.612	0.38844	282.694	0.32996	280.851	0.25252	22.0314	0.1368	21.8832	0.09418
		1.8865	1.18676			1.7783	0.54614	280.92	0.38857	283.004	0.33004	281.159	0.25255	21.723	0.13509	21.576	0.09301
		1.8869	1.18672			1.7817	0.54631	281.228	0.38871	283.315	0.33012	281.467	0.25258	21.4146	0.13348	21.2688	0.09171
		1.8885	1.18671			1.7848	0.54625	281.536	0.38885	283.625	0.33022	281.775	0.25262	21.1062	0.13147	20.9616	0.09032
		1.8926	1.1868			1.7865	0.54628	281.844	0.38898	283.935	0.33035	282.083	0.25266	20.7978	0.12946	20.6544	0.08893
		1.9005	1.18683			1.7848	0.54621	282.152	0.38912	284.245	0.33048	282.392	0.25271	20.4893	0.12745	20.3472	0.0875
		1.9069	1.18689			1.7798	0.54627	282.46	0.38926	284.555	0.3306	282.7	0.25278	20.1809	0.12538	20.04	0.08593
		1.9146	1.18693			1.7731	0.54615	282.768	0.38941	284.866	0.33073	283.008	0.25286	19.8725	0.12299	19.7328	0.08436
		1.9177	1.18689			1.7656	0.5461	283.076	0.38955	285.176	0.33088	283.316	0.25294	19.5641	0.12059	19.4256	0.08279
		1.9157	1.18692			1.761	0.54612	283.384	0.3897	285.486	0.33102	283.624	0.25299	19.2557	0.1182	19.1184	0.08105
		1.912	1.18686			1.7672	0.54619	283.692	0.38985	285.796	0.33117	283.932	0.25303	18.9473	0.11581	18.8112	0.07929
		1.9071	1.18686			1.771	0.54619	284	0.39	286.107	0.33131	284.24	0.25306	18.6389	0.11328	18.504	0.07754
		1.9019	1.18691			1.7689	0.54617	284.308	0.39014	286.417	0.33147	284.549	0.25314	18.3305	0.11041	18.1968	0.07564
		1.8981	1.18681			1.7684	0.54621	284.615	0.39029	286.727	0.33163	284.857	0.25323	18.0221	0.10776	17.8896	0.07363
		1.8944	1.18678			1.7705	0.54612	284.923	0.39044	287.037	0.3318	285.165	0.25333	17.7137	0.10468	17.5825	0.07162
		1.8902	1.18678			1.7709	0.5462	285.231	0.39059	287.348	0.33196	285.473	0.25341	17.4052	0.10179	17.2753	0.06955
		1.8844	1.18676			1.7668	0.54604	285.539	0.39074	287.658	0.33213	285.781	0.25349	17.0968	0.09868	16.9681	0.06723
		1.8819	1.18668			1.7656	0.54613	285.847	0.39088	287.968	0.3323	286.089	0.25357	16.7884	0.09541	16.6609	0.06492
		1.8778	1.18668			1.7663	0.54615	286.155	0.39102	288.278	0.33247	286.397	0.25365	16.48	0.09205	16.3537	0.0626
		1.8727	1.18667			1.7659	0.54618	286.463	0.39116	288.588	0.33265	286.705	0.25373	16.1716	0.08849	16.0465	0.06016
		1.8703	1.18662			1.7622	0.54616	286.771	0.3913	288.899	0.33282	287.014	0.25382	15.8632	0.08505	15.7393	0.05769
		1.8648	1.18666			1.7527	0.546	287.079	0.39144	289.209	0.333	287.322	0.25391	15.5548	0.08189	15.4321	0.05523
		1.8627	1.18657			1.7357	0.546	287.387	0.39158	289.519	0.33318	287.63	0.25401	15.2464	0.07874	15.1249	0.0528
		1.8636	1.18666			1.7179	0.54589	287.695	0.39172	289.829	0.33336	287.938	0.2541	14.938	0.07558	14.8177	0.05041
		1.8664	1.18668			1.7069	0.54585	288.003	0.39185	290.14	0.33353	288.246	0.25418	14.6296	0.07243	14.5105	0.04803
		1.8707	1.18664			1.6978	0.5458	288.311	0.39198	290.45	0.33368	288.554	0.25423	14.3212	0.0693	14.2033	0.04568
		1.873	1.18667			1.692	0.54585	288.618	0.39212	290.76	0.33383	288.862	0.25429	14.0128	0.06619	13.8961	0.04296
		1.8786	1.18677			1.6881	0.54579	288.926	0.39225	291.07	0.33398	289.171	0.25437	13.7043	0.06308	13.5889	0.04085
		1.8845	1.18679			1.6863	0.54577	289.234	0.39238	291.38	0.33413	289.479	0.25447	13.3959	0.05996	13.2818	0.03875
		1.8887	1.18678			1.6852	0.54582	289.542	0.39252	291.691	0.33425	289.787	0.25457	13.0875	0.05686	12.9746	0.03616
		1.8877	1.18674			1.6827	0.54587	289.85	0.39267	292.001	0.33438	290.095	0.25465	12.7791	0.05423	12.6674	0.0341
		1.8856	1.18676			1.6815	0.54577	290.158	0.39281	292.311	0.33451	290.403	0.25469	12.4707	0.05098	12.3602	0.03195
		1.883	1.18682			1.6791	0.54568	290.466	0.39296	292.621	0.33463	290.711	0.25473	12.1623	0.04832	12.053	0.03004
		1.8789	1.18676			1.6775	0.54561	290.774	0.3931	292.932	0.33476	291.019	0.25478	11.8539	0.04564	11.7458	0.0278
		1.8739	1.1867			1.675	0.5457	291.082	0.39325	293.242	0.33488	291.328	0.25484	11.5455	0.04304	11.4386	0.02604
		1.8732	1.18669			1.6735	0.54569	291.39	0.39339	293.552	0.33501	291.636	0.25491	11.2371	0.03978	11.1314	0.02428
		1.8682	1.18666			1.6714	0.54558	291.698	0.39354	293.862	0.33513	291.944	0.255	10.9287	0.03724	10.8242	0.02264
		1.8633	1.1866			1.6695	0.5457	292.006	0.39367	294.172	0.33523	292.252	0.25514	10.6203	0.03469	10.517	0.02094
		1.8575	1.18652			1.6686	0.54564	292.314	0.39379	294.483	0.3353	292.56	0.25527	10.3118	0.03219	10.2098	0.01911
		1.8505	1.18654			1.64106	0.5454	292.622	0.3939	294.793	0.33538	292.868	0.25538	10.0034	0.02991	9.90263	0.01754
		1.8417	1.18645					292.929	0.39402	295.103	0.33545	293.176	0.25543	9.69503	0.0278	9.59543	0.01603
		1.8354	1.18644					293.237	0.39413	295.413	0.33552	293.485	0.25547	9.38662	0.02563	9.28824	0.01461
		1.8323	1.18643					293.545	0.39424	295.724	0.3356	293.793	0.25553	9.07821	0.02346	8.98105	0.01315
		1.8341	1.18641					293.853	0.39436	296.034	0.33567	294.101	0.25561	8.76981	0.0214	8.67386	0.01191
		1.8375	1.18649					294.161	0.39447	296.344	0.33574	294.409	0.2557	8.4614	0.01962	8.36666	0.01065
		1.8353	1.1865					294.469	0.39458	296.654	0.33582	294.717	0.25578	8.15299	0.01799	8.05947	0.00943
		1.8318	1.18646					294.777	0.3947	296.964	0.33589	295.025	0.25585	7.84458	0.01637	7.75228	0.00828
		1.8269	1.18647					295.085	0.39482	297.275	0.33597	295.333	0.25592	7.53617	0.01474	7.48886	0.0073
		1.826	1.18641					295.393	0.39494	297.585	0.33604	295.642	0.256	7.22776	0.01328	7.13789	0.00614
		1.8263	1.18648					295.701	0.39506	297.895	0.33611	295.95	0.25611	6.91935	0.01188	6.8307	0.00525
		1.8281	1.18642					296.009	0.3952	298.205	0.33619	296.258	0.25622	6.61094	0.01068	6.5235	0.00456
		1.8305	1.18645					296.317	0.39534	298.516	0.33627	296.566	0.25632	6.30253	0.00958	6.21631	0.00391
		1.8315	1.18649					296.625	0.39548	298.826	0.33634	296.874	0.25639	5.99412	0.00868	5.90912	0.00326
		1.836	1.18653					296.932	0.39562	299.136	0.33642	297.182	0.25646	5.68572	0.00794	5.60193	0.00277
		1.8433	1.18652					297.24	0.39576	299.446	0.3365	297.49	0.25653	5.37731	0.00704	5.29473	0.00224
		1.8535	1.18665					297.548	0.3959	299.757	0.33658	297.798	0.25654	5.0689	0.00639	4.98754	0.00185
		1.8584	1.18668					297.856	0.39604	300.067	0.33666	298.107	0.25655	4.76049	0.00574	4.68035	0.00145
		1.859	1.18664					298.164	0.39618	300.377	0.33674	298.415	0.25659	4.45208	0.00505	4.37315	0.00113
		1.8602	1.18667					298.472	0.39633	300.687	0.33682	298.723	0.25677	4.14367	0.00456	4.06596	8.6442E-4
		1.8601	1.18664					298.78	0.39645	300.997	0.3369	299.031	0.25696	3.83526	0.00413	3.75877	6.13737E-4
		1.8579	1.18665					299.088	0.39658	301.308	0.33698	299.339	0.25713	3.52685	0.0037	3.45157	4.23104E-4
		1.855	1.18662					299.396	0.3967	301.618	0.33706	299.647	0.25717	3.21844	0.00336	3.14438	2.45815E-4
		1.8549	1.18653					299.704	0.39678	301.928	0.33715	299.955	0.2572	2.91004	0.00308	2.83719	1.32388E-4
		1.7946	1.18604					300.012	0.39685	302.238	0.33725	300.264	0.25724	2.60163	0.00287	2.53	1.01886E-4
								300.32	0.39692	302.549	0.33735	300.572	0.25736	2.29322	0.0026	2.2228	5.8994E-5
										302.859	0.33746	300.88	0.25748	1.98481	0.00238	1.91561	4.66028E-5
										303.169	0.33756	301.188	0.2576	1.6764	0.00231	1.60842	1.41952E-5

## Sheet: fig3b
33.8 GPa		42.3 GPa		50.6 GPa		62.7 GPa GPa		72.1 GPa
T(K)	R(Ohm)	T(K)	R(Ohm)	T(K)	R(Ohm)	T(K)	R(Ohm)	T(K)	R(Ohm)
1.6323	0.11105	1.63	0.04982	1.6774	0.01804	1.6764	0.00231	1.60842	1.41952E-5
1.94023	0.11977	1.94023	0.05349	1.98554	0.01932	1.98481	0.00238	1.91561	4.66028E-5
2.24815	0.13208	2.25045	0.05834	2.29368	0.0206	2.29322	0.0026	2.2228	5.8994E-5
2.55608	0.14644	2.56068	0.06319	2.60182	0.02187	2.60163	0.00287	2.53	1.01886E-4
2.864	0.16018	2.8709	0.06814	2.90995	0.02346	2.91004	0.00308	2.83719	1.32388E-4
3.17193	0.17454	3.18113	0.0723	3.21809	0.02506	3.21844	0.00336	3.14438	2.45815E-4
3.47985	0.18962	3.49135	0.07804	3.52623	0.02667	3.52685	0.0037	3.45157	4.23104E-4
3.78778	0.20429	3.80158	0.08369	3.83437	0.02787	3.83526	0.00413	3.75877	6.13737E-4
4.0957	0.21742	4.1118	0.08933	4.14251	0.02988	4.14367	0.00456	4.06596	8.6442E-4
4.40363	0.23189	4.42203	0.09527	4.45065	0.0319	4.45208	0.00505	4.37315	0.00113
4.71155	0.24184	4.73225	0.10151	4.75878	0.03438	4.76049	0.00574	4.68035	0.00145
5.01948	0.25168	5.04248	0.10774	5.06692	0.03687	5.0689	0.00639	4.98754	0.00185
5.3274	0.26143	5.3527	0.11398	5.37506	0.03858	5.37731	0.00704	5.29473	0.00224
5.63533	0.27065	5.66293	0.12032	5.6832	0.04148	5.68572	0.00794	5.60193	0.00277
5.94325	0.27823	5.97315	0.12695	5.99134	0.0445	5.99412	0.00868	5.90912	0.00326
6.25118	0.28582	6.28338	0.13369	6.29948	0.04752	6.30253	0.00958	6.21631	0.00391
6.5591	0.29175	6.5936	0.14032	6.60762	0.05083	6.61094	0.01068	6.5235	0.00456
6.86703	0.29737	6.90383	0.14695	6.91575	0.05421	6.91935	0.01188	6.8307	0.00525
7.17495	0.30299	7.21406	0.15279	7.22389	0.05758	7.22776	0.01328	7.13789	0.00614
7.48288	0.30704	7.52428	0.15992	7.53203	0.06095	7.53617	0.01474	7.48886	0.0073
7.7908	0.31072	7.83451	0.16576	7.84017	0.06515	7.84458	0.01637	7.75228	0.00828
8.09873	0.3144	8.14473	0.17299	8.14831	0.06859	8.15299	0.01799	8.05947	0.00943
8.40665	0.31723	8.45496	0.17844	8.45645	0.07149	8.4614	0.01962	8.36666	0.01065
8.71458	0.31982	8.76518	0.1852	8.76458	0.07598	8.76981	0.0214	8.67386	0.01191
9.0225	0.3224	9.07541	0.19066	9.07272	0.07977	9.07821	0.02346	8.98105	0.01315
9.33043	0.32427	9.38563	0.19612	9.38086	0.08424	9.38662	0.02563	9.28824	0.01461
9.63835	0.32589	9.69586	0.20139	9.689	0.08793	9.69503	0.0278	9.59543	0.01603
9.94628	0.32751	10.0061	0.20656	9.99714	0.09162	10.0034	0.02991	9.90263	0.01754
10.2542	0.32849	10.3163	0.21172	10.3053	0.09561	10.3118	0.03219	10.2098	0.01911
10.5621	0.32922	10.6265	0.21689	10.6134	0.09974	10.6203	0.03469	10.517	0.02094
10.8701	0.32995	10.9368	0.22183	10.9215	0.10387	10.9287	0.03724	10.8242	0.02264
11.178	0.33051	11.247	0.22646	11.2297	0.10837	11.2371	0.03978	11.1314	0.02428
11.4859	0.33099	11.5572	0.23109	11.5378	0.11308	11.5455	0.04304	11.4386	0.02604
11.7938	0.33148	11.8674	0.23573	11.846	0.11779	11.8539	0.04564	11.7458	0.0278
12.1017	0.33189	12.1777	0.24029	12.1541	0.12229	12.1623	0.04832	12.053	0.03004
12.4097	0.33228	12.4879	0.24457	12.4622	0.12663	12.4707	0.05098	12.3602	0.03195
12.7176	0.33267	12.7981	0.24885	12.7704	0.13097	12.7791	0.05423	12.6674	0.0341
13.0255	0.33284	13.1083	0.25312	13.0785	0.13577	13.0875	0.05686	12.9746	0.03616
13.3334	0.33288	13.4186	0.25616	13.3867	0.14019	13.3959	0.05996	13.2818	0.03875
13.6414	0.33292	13.7288	0.25962	13.6948	0.14534	13.7043	0.06308	13.5889	0.04085
13.9493	0.33291	14.039	0.26177	14.0029	0.14995	14.0128	0.06619	13.8961	0.04296
14.2572	0.33289	14.3492	0.26392	14.3111	0.15403	14.3212	0.0693	14.2033	0.04568
14.5651	0.33286	14.6595	0.26607	14.6192	0.15887	14.6296	0.07243	14.5105	0.04803
14.8731	0.33272	14.9697	0.26754	14.9274	0.16278	14.938	0.07558	14.8177	0.05041
15.181	0.33249	15.2799	0.26878	15.2355	0.1665	15.2464	0.07874	15.1249	0.0528
15.4889	0.33226	15.5901	0.27001	15.5436	0.17022	15.5548	0.08189	15.4321	0.05523
15.7968	0.33203	15.9004	0.27125	15.8518	0.17388	15.8632	0.08505	15.7393	0.05769
16.1048	0.33178	16.2106	0.27204	16.1599	0.17744	16.1716	0.08849	16.0465	0.06016
16.4127	0.33153	16.5208	0.27241	16.4681	0.181	16.48	0.09205	16.3537	0.0626
16.7206	0.33126	16.831	0.27278	16.7762	0.18439	16.7884	0.09541	16.6609	0.06492
17.0285	0.33096	17.1413	0.27316	17.0843	0.18753	17.0968	0.09868	16.9681	0.06723
17.3365	0.33066	17.4515	0.27343	17.3925	0.19066	17.4052	0.10179	17.2753	0.06955
17.6444	0.33036	17.7617	0.27347	17.7006	0.19357	17.7137	0.10468	17.5825	0.07162
17.9523	0.33004	18.0719	0.27352	18.0087	0.19607	18.0221	0.10776	17.8896	0.07363
18.2602	0.32973	18.3822	0.27356	18.3169	0.19857	18.3305	0.11041	18.1968	0.07564
18.5682	0.32942	18.6924	0.27359	18.625	0.20083	18.6389	0.11328	18.504	0.07754
18.8761	0.32909	19.0026	0.27348	18.9332	0.20258	18.9473	0.11581	18.8112	0.07929
19.184	0.32877	19.3128	0.27337	19.2413	0.20433	19.2557	0.1182	19.1184	0.08105
19.492	0.32846	19.6231	0.27326	19.5494	0.20589	19.5641	0.12059	19.4256	0.08279
19.7999	0.32816	19.9333	0.27315	19.8576	0.207	19.8725	0.12299	19.7328	0.08436
20.1078	0.32786	20.2435	0.27298	20.1657	0.20811	20.1809	0.12538	20.04	0.08593
20.4157	0.32756	20.5537	0.27281	20.4738	0.20906	20.4893	0.12745	20.3472	0.0875
20.7237	0.32726	20.864	0.27264	20.782	0.20956	20.7978	0.12946	20.6544	0.08893
21.0316	0.32697	21.1742	0.27246	21.0901	0.21006	21.1062	0.13147	20.9616	0.09032
21.3395	0.32668	21.4844	0.27228	21.3983	0.21049	21.4146	0.13348	21.2688	0.09171
21.6474	0.32641	21.7947	0.27208	21.7064	0.21068	21.723	0.13509	21.576	0.09301
21.9554	0.32614	22.1049	0.27188	22.0145	0.21087	22.0314	0.1368	21.8832	0.09418
22.2633	0.32589	22.4151	0.27168	22.3227	0.21103	22.3398	0.13823	22.1903	0.09535
22.5712	0.32569	22.7253	0.27149	22.6308	0.21106	22.6482	0.13966	22.4975	0.0965
22.8791	0.32549	23.0356	0.27131	22.9389	0.21109	22.9753	0.14102	22.8047	0.09709
23.1871	0.32524	23.3458	0.27112	23.2471	0.21111	23.265	0.14198	23.1119	0.09769
23.495	0.3249	23.656	0.27094	23.5552	0.21109	23.5734	0.14277	23.4191	0.09828
23.8029	0.32455	23.9662	0.27076	23.8634	0.21106	23.8761	0.14338	23.7263	0.09865
24.1108	0.32423	24.2765	0.27059	24.1715	0.21103	24.1902	0.14378	24.0335	0.09892
24.4188	0.32397	24.5867	0.27042	24.4796	0.21098	24.4987	0.14398	24.3407	0.09919
24.7267	0.32371	24.8969	0.27024	24.7878	0.21092	24.8071	0.14407	24.6479	0.0994
25.0346	0.32345	25.2071	0.27007	25.0959	0.21087	25.1155	0.14413	24.9551	0.0995
25.3425	0.3232	25.5174	0.2699	25.4041	0.21079	25.4239	0.14419	25.2623	0.0996
25.6505	0.32295	25.8276	0.26972	25.7122	0.21072	25.7323	0.14425	25.5695	0.0997
25.9584	0.32271	26.1378	0.26955	26.0203	0.21064	26.0407	0.14426	25.8767	0.09972
26.2663	0.32248	26.448	0.26938	26.3285	0.21058	26.3491	0.1443	26.1839	0.09973
26.5742	0.32225	26.7583	0.26921	26.6366	0.21051	26.6575	0.1443	26.4911	0.09974
26.8822	0.32202	27.0685	0.26905	26.9448	0.21045	26.9659	0.14431	26.7982	0.09975
27.1901	0.32181	27.3787	0.26889	27.2529	0.21039	27.2743	0.14431	27.1054	0.09974
27.498	0.3216	27.6889	0.26873	27.561	0.21033	27.5828	0.1443	27.4126	0.09973
27.8059	0.32138	27.9992	0.26858	27.8692	0.21027	27.8912	0.14429	27.7198	0.09973
28.1139	0.32117	28.3094	0.26844	28.1773	0.2102	28.1996	0.14428	28.027	0.09972
28.4218	0.32096	28.6196	0.26829	28.4855	0.21012	28.508	0.14427	28.3342	0.09971
28.7297	0.32075	28.9298	0.26815	28.7936	0.21005	28.8164	0.14425	28.6414	0.0997
29.0376	0.32057	29.2401	0.26801	29.1017	0.20999	29.1248	0.14424	28.9486	0.09969
29.3456	0.32038	29.5503	0.26788	29.4099	0.20993	29.4332	0.14422	29.2558	0.09968
29.6535	0.3202	29.8605	0.26776	29.718	0.20987	29.7416	0.1442	29.563	0.09967
29.9614	0.32001	30.1707	0.26763	30.0261	0.20981	30.05	0.14418	29.8702	0.09967
30.2693	0.31981	30.4809	0.2675	30.3343	0.20975	30.3584	0.14417	30.1774	0.09966
30.5773	0.31962	30.7912	0.26738	30.6424	0.20969	30.6668	0.14416	30.4846	0.09965
30.8852	0.31945	31.1014	0.26726	30.9506	0.20965	30.9752	0.14415	30.7918	0.09965
31.1931	0.31929	31.4116	0.26714	31.2587	0.2096	31.2837	0.14414	31.0989	0.09964
31.501	0.31913	31.7218	0.26702	31.5668	0.20956	31.5921	0.14413	31.4061	0.09963
31.809	0.31896	32.0321	0.2669	31.875	0.20952	31.9005	0.14411	31.7133	0.09963
32.1169	0.31879	32.3423	0.26679	32.1831	0.20947	32.2089	0.1441	32.0205	0.09962
32.4248	0.31862	32.6525	0.26668	32.4913	0.20942	32.5173	0.14408	32.3277	0.09961
32.7327	0.31846	32.9628	0.26656	32.7994	0.20937	32.8257	0.14406	32.6349	0.0996
33.0407	0.3183	33.273	0.26646	33.1075	0.20933	33.1341	0.14405	32.9421	0.09959
33.3486	0.31814	33.5832	0.26637	33.4157	0.20929	33.4425	0.14404	33.2493	0.09959
33.6565	0.318	33.8934	0.26627	33.7238	0.20925	33.7509	0.14404	33.5565	0.09958
33.9644	0.31785	34.2037	0.26618	34.0319	0.20922	34.0593	0.14404	33.8637	0.09958
34.2724	0.3177	34.5139	0.26609	34.3401	0.20918	34.3678	0.14403	34.1709	0.09958
34.5803	0.31756	34.8241	0.266	34.6482	0.20915	34.6761	0.14402	34.4781	0.09957
34.8882	0.31742	35.1343	0.26591	34.9564	0.20911	34.9846	0.14401	34.7853	0.09957
35.1961	0.31728	35.4446	0.26583	35.2645	0.20907	35.293	0.14399	35.0924	0.09956
35.5041	0.31713	35.7548	0.26574	35.5726	0.20904	35.6014	0.14397	35.3997	0.09955
35.812	0.31699	36.065	0.26566	35.8808	0.20901	35.9098	0.14396	35.7068	0.09955
36.1199	0.31685	36.3752	0.26558	36.1889	0.20898	36.2182	0.14396	36.014	0.09954
36.4278	0.31672	36.6855	0.2655	36.4971	0.20895	36.5266	0.14396	36.3212	0.09955
36.7358	0.3166	36.9957	0.26542	36.8052	0.20892	36.835	0.14396	36.6284	0.09955
37.0437	0.31648	37.3059	0.26535	37.1133	0.20888	37.1434	0.14396	36.9356	0.09955
37.3516	0.31636	37.6161	0.26528	37.4215	0.20885	37.4518	0.14396	37.2428	0.09956
37.6595	0.31625	37.9264	0.26521	37.7296	0.20882	37.7602	0.14395	37.55	0.09956
37.9675	0.31614	38.2366	0.26513	38.0377	0.2088	38.0686	0.14395	37.8572	0.09956
38.2754	0.31603	38.5468	0.26506	38.3459	0.20877	38.3771	0.14394	38.1644	0.09956
38.5833	0.31592	38.857	0.265	38.654	0.20874	38.6855	0.14393	38.4716	0.09956
38.8912	0.31582	39.1673	0.26493	38.9622	0.20871	38.9939	0.14393	38.7788	0.09956
39.1992	0.31571	39.4775	0.26486	39.2703	0.20869	39.3023	0.14391	39.086	0.09957
39.5071	0.3156	39.7877	0.2648	39.5784	0.20868	39.6107	0.1439	39.3931	0.09958
39.815	0.31548	40.0979	0.26474	39.8866	0.20866	39.9191	0.14389	39.7004	0.09958
40.1229	0.31538	40.4082	0.26468	40.1947	0.20864	40.2275	0.14388	40.0075	0.09959
40.4309	0.31529	40.7184	0.26462	40.5029	0.20862	40.5359	0.14389	40.3147	0.0996
40.7388	0.31519	41.0286	0.26456	40.811	0.20859	40.8443	0.1439	40.6219	0.09961
41.0467	0.3151	41.3388	0.26451	41.1191	0.20857	41.1527	0.1439	40.9291	0.09962
41.3546	0.31501	41.6491	0.26445	41.4273	0.20855	41.4612	0.14391	41.2363	0.09963
41.6626	0.31492	41.9593	0.2644	41.7354	0.20852	41.7696	0.14391	41.5435	0.09963
41.9705	0.31483	42.2695	0.26435	42.0435	0.2085	42.078	0.14391	41.8507	0.09964
42.2784	0.31475	42.5797	0.26431	42.3517	0.20848	42.3864	0.14391	42.1579	0.09965
42.5863	0.31467	42.89	0.26427	42.6598	0.20846	42.6948	0.1439	42.4651	0.09965
42.8943	0.3146	43.2002	0.26424	42.968	0.20844	43.0032	0.1439	42.7723	0.09966
43.2022	0.31453	43.5104	0.2642	43.2761	0.20842	43.3116	0.1439	43.0795	0.09966
43.5101	0.31446	43.8206	0.26417	43.5842	0.20841	43.62	0.1439	43.3867	0.09968
43.818	0.31438	44.1309	0.26413	43.8924	0.20839	43.9284	0.1439	43.6939	0.0997
44.126	0.3143	44.4411	0.2641	44.2005	0.20838	44.2368	0.14391	44.001	0.09971
44.4339	0.31422	44.7513	0.26407	44.5087	0.20837	44.5452	0.14391	44.3082	0.09972
44.7418	0.31415	45.0615	0.26404	44.8168	0.20835	44.8537	0.14392	44.6154	0.09973
45.0497	0.3141	45.3718	0.26401	45.1249	0.20834	45.1621	0.14393	44.9226	0.09974
45.3577	0.31404	45.682	0.26398	45.4331	0.20833	45.4705	0.14394	45.2298	0.09975
45.6656	0.31398	45.9922	0.26395	45.7412	0.20832	45.7789	0.14396	45.537	0.09976
45.9735	0.31393	46.3024	0.26392	46.0493	0.20831	46.0873	0.14397	45.8442	0.09976
46.2814	0.31388	46.6127	0.26389	46.3575	0.2083	46.3957	0.14397	46.1514	0.09977
46.5894	0.31383	46.9229	0.26386	46.6656	0.20829	46.7041	0.14398	46.4586	0.09978
46.8973	0.31377	47.2331	0.26383	46.9738	0.20828	47.0125	0.14399	46.7658	0.09979
47.2052	0.31371	47.5433	0.2638	47.2819	0.20827	47.3209	0.144	47.073	0.0998
47.5131	0.31366	47.8536	0.26375	47.59	0.20826	47.6293	0.14401	47.3802	0.09982
47.8211	0.31362	48.1638	0.26371	47.8982	0.20825	47.9377	0.14401	47.6874	0.09983
48.129	0.31357	48.474	0.26367	48.2063	0.20825	48.2462	0.14402	47.9946	0.09984
48.4369	0.31353	48.7843	0.26363	48.5144	0.20824	48.5546	0.14403	48.3017	0.09985
48.7448	0.31348	49.0945	0.2636	48.8226	0.20824	48.863	0.14404	48.6089	0.09987
49.0528	0.31344	49.4047	0.26358	49.1307	0.20823	49.1714	0.14405	48.9161	0.09988
49.3607	0.31339	49.7149	0.26356	49.4389	0.20823	49.4798	0.14406	49.2233	0.0999
49.6686	0.31334	50.0251	0.26353	49.747	0.20822	49.7882	0.14407	49.5305	0.09991
49.9765	0.31329	50.3354	0.26352	50.0551	0.20822	50.0966	0.14408	49.8377	0.09992
50.2845	0.31325	50.6456	0.2635	50.3633	0.20822	50.405	0.14409	50.1449	0.09994
50.5924	0.31323	50.9558	0.26349	50.6714	0.20821	50.7134	0.14409	50.4521	0.09995
50.9003	0.31321	51.266	0.26347	50.9796	0.20821	51.0218	0.1441	50.7593	0.09996
51.2082	0.31318	51.5763	0.26346	51.2877	0.20821	51.3302	0.1441	51.0665	0.09997
51.5162	0.31314	51.8865	0.26345	51.5958	0.2082	51.6386	0.14411	51.3737	0.09998
51.8241	0.31311	52.1967	0.26345	51.904	0.2082	51.947	0.14413	51.6809	0.1
52.132	0.31308	52.507	0.26344	52.2121	0.20819	52.2555	0.14415	51.9881	0.10002
52.4399	0.31304	52.8172	0.26343	52.5202	0.20819	52.5639	0.14417	52.2953	0.10004
52.7479	0.31301	53.1274	0.26342	52.8284	0.20819	52.8723	0.14419	52.6024	0.10005
53.0558	0.31298	53.4376	0.26341	53.1365	0.20818	53.1807	0.1442	52.9096	0.10007
53.3637	0.31297	53.7478	0.26341	53.4447	0.2082	53.4891	0.14422	53.2168	0.10009
53.6716	0.31296	54.0581	0.2634	53.7528	0.20821	53.7975	0.14423	53.524	0.1001
53.9796	0.31295	54.3683	0.2634	54.0609	0.20822	54.1059	0.14425	53.8312	0.10012
54.2875	0.31293	54.6785	0.2634	54.3691	0.20823	54.4143	0.14426	54.1384	0.10014
54.5954	0.31292	54.9888	0.2634	54.6772	0.20823	54.7227	0.14427	54.4456	0.10016
54.9033	0.3129	55.299	0.2634	54.9854	0.20824	55.0311	0.14427	54.7528	0.10018
55.2113	0.31288	55.6092	0.2634	55.2935	0.20824	55.3396	0.14427	55.06	0.1002
55.5192	0.31287	55.9194	0.2634	55.6016	0.20824	55.648	0.14428	55.3672	0.10022
55.8271	0.31285	56.2296	0.2634	55.9098	0.20824	55.9564	0.14428	55.6744	0.10023
56.135	0.31284	56.5399	0.26341	56.2179	0.20826	56.2648	0.1443	55.9816	0.10024
56.443	0.31282	56.8501	0.26341	56.526	0.20828	56.5732	0.14432	56.2888	0.10026
56.7509	0.3128	57.1603	0.26342	56.8342	0.2083	56.8816	0.14435	56.596	0.10027
57.0588	0.31271	57.4706	0.26343	57.1423	0.2083	57.19	0.14437	56.9031	0.10029
57.3667	0.31262	57.7808	0.26343	57.4505	0.20831	57.4984	0.14439	57.2103	0.10031
57.6747	0.31255	58.091	0.26344	57.7586	0.20831	57.8068	0.1444	57.5175	0.10033
57.9826	0.31254	58.4012	0.26345	58.0667	0.20832	58.1152	0.14442	57.8247	0.10035
58.2905	0.31253	58.7115	0.26346	58.3749	0.20834	58.4236	0.14444	58.1319	0.10037
58.5984	0.31252	59.0217	0.26346	58.683	0.20836	58.7321	0.14446	58.4391	0.10039
58.9064	0.31252	59.3319	0.26347	58.9912	0.20837	59.0405	0.14449	58.7463	0.10041
59.2143	0.31252	59.6421	0.26348	59.2993	0.20839	59.3489	0.14451	59.0535	0.10043
59.5222	0.31252	59.9524	0.2635	59.6074	0.2084	59.6573	0.14454	59.3607	0.10045
59.8301	0.31252	60.2626	0.26351	59.9156	0.20841	59.9657	0.14457	59.6679	0.10047
60.1381	0.31252	60.5728	0.26352	60.2237	0.20842	60.2741	0.1446	59.9751	0.10049
60.446	0.31252	60.883	0.26354	60.5318	0.20843	60.5825	0.14462	60.2823	0.10051
60.7539	0.31253	61.1933	0.26355	60.84	0.20845	60.8909	0.14463	60.5895	0.10053
61.0618	0.31255	61.5035	0.26357	61.1481	0.20846	61.1993	0.14464	60.8967	0.10056
61.3698	0.31256	61.8137	0.26358	61.4563	0.20847	61.5077	0.14466	61.2039	0.10058
61.6777	0.31257	62.1239	0.26359	61.7644	0.20849	61.8161	0.14468	61.511	0.1006
61.9856	0.31257	62.4342	0.2636	62.0725	0.20851	62.1245	0.14471	61.8182	0.10062
62.2935	0.31258	62.7444	0.26361	62.3807	0.20853	62.433	0.14474	62.1254	0.10064
62.6015	0.3126	63.0546	0.26361	62.6888	0.20854	62.7414	0.14477	62.4326	0.10066
62.9094	0.31261	63.3648	0.26363	62.997	0.20855	63.0498	0.1448	62.7398	0.10068
63.2173	0.31263	63.6751	0.26365	63.3051	0.20856	63.3582	0.14482	63.047	0.1007
63.5252	0.31265	63.9853	0.26367	63.6132	0.20858	63.6666	0.14484	63.3542	0.10072
63.8332	0.31267	64.2955	0.26369	63.9214	0.20861	63.975	0.14486	63.6614	0.10074
64.1411	0.31269	64.6057	0.26371	64.2295	0.20865	64.2834	0.14489	63.9686	0.10077
64.449	0.31271	64.916	0.26373	64.5376	0.20867	64.5918	0.14491	64.2758	0.10079
64.7569	0.31273	65.2262	0.26375	64.8458	0.20869	64.9002	0.14494	64.583	0.10082
65.0649	0.31275	65.5364	0.26377	65.1539	0.20871	65.2086	0.14496	64.8902	0.10084
65.3728	0.31276	65.8466	0.26379	65.4621	0.20872	65.517	0.14499	65.1974	0.10086
65.6807	0.31277	66.1569	0.26381	65.7702	0.20872	65.8255	0.14502	65.5046	0.10088
65.9886	0.31278	66.4671	0.26384	66.0783	0.20873	66.1339	0.14504	65.8118	0.10089
66.2966	0.31279	66.7773	0.26386	66.3865	0.20874	66.4423	0.14507	66.1189	0.10091
66.6045	0.31281	67.0875	0.26389	66.6946	0.20877	66.7507	0.14509	66.4261	0.10093
66.9124	0.31283	67.3978	0.26391	67.0028	0.20879	67.0591	0.14512	66.7333	0.10095
67.2203	0.31286	67.708	0.26394	67.3109	0.20882	67.3675	0.14514	67.0405	0.10097
67.5283	0.31289	68.0182	0.26396	67.619	0.20884	67.6759	0.14517	67.3477	0.10099
67.8362	0.31292	68.3284	0.26399	67.9272	0.20887	67.9843	0.14519	67.6549	0.10102
68.1441	0.31294	68.6387	0.26402	68.2353	0.20889	68.2927	0.14521	67.9621	0.10104
68.452	0.31296	68.9489	0.26405	68.5435	0.20892	68.6011	0.14524	68.2693	0.10107
68.76	0.31298	69.2591	0.26408	68.8516	0.20895	68.9095	0.14526	68.5765	0.10109
69.0679	0.31302	69.5693	0.26412	69.1597	0.20897	69.218	0.14529	68.8837	0.10112
69.3758	0.31306	69.8796	0.26415	69.4679	0.20899	69.5264	0.14532	69.1909	0.10115
69.6837	0.31311	70.1898	0.26418	69.776	0.20901	69.8348	0.14535	69.4981	0.10118
69.9917	0.31314	70.5	0.26421	70.0841	0.20903	70.1432	0.14538	69.8053	0.10121
70.2996	0.31316	70.8102	0.26424	70.3923	0.20905	70.4516	0.14541	70.1124	0.10123
70.6075	0.31319	71.1205	0.26428	70.7004	0.20906	70.76	0.14543	70.4197	0.10126
70.9154	0.31321	71.4307	0.26431	71.0086	0.20908	71.0684	0.14546	70.7268	0.10128
71.2234	0.31324	71.7409	0.26435	71.3167	0.20912	71.3768	0.14548	71.034	0.10131
71.5313	0.31326	72.0512	0.26439	71.6248	0.20915	71.6852	0.14551	71.3412	0.10133
71.8392	0.31329	72.3614	0.26443	71.933	0.20919	71.9936	0.14554	71.6484	0.10135
72.1471	0.31333	72.6716	0.26446	72.2411	0.20921	72.302	0.14557	71.9556	0.10137
72.4551	0.31337	72.9818	0.26449	72.5493	0.20923	72.6105	0.1456	72.2628	0.10139
72.763	0.3134	73.2921	0.26453	72.8574	0.20925	72.9189	0.14563	72.57	0.1014
73.0709	0.31344	73.6023	0.26456	73.1655	0.20929	73.2273	0.14566	72.8772	0.10142
73.3788	0.31347	73.9125	0.26459	73.4737	0.20932	73.5357	0.1457	73.1844	0.10144
73.6868	0.31351	74.2227	0.26462	73.7818	0.20936	73.8441	0.14574	73.4916	0.10147
73.9947	0.31355	74.5329	0.26466	74.0899	0.20939	74.1525	0.14578	73.7988	0.10149
74.3026	0.31359	74.8432	0.26469	74.3981	0.20942	74.4609	0.14582	74.106	0.10152
74.6106	0.31362	75.1534	0.26472	74.7062	0.20945	74.7693	0.14584	74.4132	0.10155
74.9185	0.31365	75.4636	0.26476	75.0144	0.20947	75.0777	0.14586	74.7203	0.10158
75.2264	0.31369	75.7738	0.26481	75.3225	0.20949	75.3861	0.14589	75.0275	0.1016
75.5343	0.31372	76.0841	0.26485	75.6306	0.20951	75.6945	0.14591	75.3347	0.10163
75.8423	0.31377	76.3943	0.26489	75.9388	0.20954	76.0029	0.14594	75.6419	0.10166
76.1502	0.31381	76.7045	0.26493	76.2469	0.20957	76.3114	0.14598	75.9491	0.10169
76.4581	0.31386	77.0148	0.26497	76.555	0.20961	76.6198	0.14601	76.2563	0.10171
76.766	0.31391	77.325	0.26502	76.8632	0.20963	76.9282	0.14605	76.5635	0.10173
77.0739	0.31397	77.6352	0.26506	77.1713	0.20965	77.2366	0.14608	76.8707	0.10176
77.3819	0.31401	77.9454	0.2651	77.4795	0.20967	77.545	0.14612	77.1779	0.10178
77.6898	0.31404	78.2557	0.26514	77.7876	0.20972	77.8534	0.14615	77.4851	0.10181
77.9977	0.31407	78.5659	0.26518	78.0957	0.20976	78.1618	0.14619	77.7923	0.10184
78.3056	0.3141	78.8761	0.26523	78.4039	0.20981	78.4702	0.14623	78.0995	0.10186
78.6136	0.31412	79.1863	0.26526	78.712	0.20985	78.7786	0.14626	78.4067	0.10189
78.9215	0.31415	79.4965	0.2653	79.0202	0.20989	79.087	0.1463	78.7139	0.10192
79.2294	0.31418	79.8068	0.26533	79.3283	0.20993	79.3954	0.14634	79.0211	0.10195
79.5374	0.31423	80.117	0.26537	79.6364	0.20996	79.7039	0.14638	79.3282	0.10198
79.8453	0.31428	80.4272	0.26541	79.9446	0.20999	80.0123	0.14642	79.6354	0.10201
80.1532	0.31433	80.7374	0.26545	80.2527	0.21002	80.3207	0.14646	79.9426	0.10204
80.4611	0.31437	81.0477	0.2655	80.5609	0.21006	80.6291	0.14649	80.2498	0.10207
80.769	0.31442	81.3579	0.26555	80.869	0.21009	80.9375	0.14652	80.557	0.10211

## Sheet: fig3c
0.5 GPa		2 GPa		3.6 GPa		5.5 GPa		7.6 GPa		9.9 GPa		12 GPa		14.3 GPa		17.5 GPa		20.2 GPa
T(K)	R(Ohm)	T(K)	R(Ohm)	T(K)	R(Ohm)	T(K)	R(Ohm)	T(K)	R(Ohm)	T(K)	R(Ohm)	T(K)	R(Ohm)	T(K)	R(Ohm)	T(K)	R(Ohm)	T(K)	R(Ohm)
298.982	0.30792	297.951	0.26151	299.723	0.1781	300.379	0.12399	1.96129	0.01	1.6785	0.01591	1.6546	0.01654	1.6837	0.01537	1.6489	0.03601	1.6495	0.04748
296.745	0.30676	297.889	0.26065	299.52	0.17819	298.385	0.12339	2.53429	0.00992	1.93877	0.01586	1.88851	0.01646	1.93469	0.01533	2.31051	0.03594	1.6506	0.04744
294.84	0.30562	295.159	0.25981	299.375	0.17826	296.124	0.12266	2.88761	0.00984	2.19903	0.01582	2.13429	0.01638	2.18567	0.0153	2.84512	0.03588	1.6904	0.04741
292.77	0.3045	293.295	0.25901	299.298	0.1783	293.235	0.1218	3.20279	0.00978	2.4593	0.01578	2.32239	0.01631	2.43666	0.01527	3.37854	0.03581	1.9745	0.04738
291.362	0.30339	292.596	0.25824	299.156	0.17831	290.895	0.1208	3.63461	0.00972	2.71956	0.01574	2.59576	0.01624	2.68764	0.01524	3.95509	0.03575	2.0538	0.04735
288.656	0.3023	291.45	0.2575	298.953	0.1783	286.373	0.11966	3.91904	0.00966	2.97983	0.01571	2.91427	0.01619	2.93863	0.01521	4.53163	0.03569	2.141	0.04732
287.221	0.30122	290.084	0.2568	298.821	0.17828	282.762	0.1184	4.20761	0.00963	3.24009	0.01567	3.27542	0.01614	3.18962	0.01518	5.03005	0.03564	2.1868	0.0473
285.785	0.30016	289.198	0.25613	298.648	0.17824	280.234	0.11711	4.60665	0.00959	3.50036	0.01564	3.39079	0.0161	3.4406	0.01515	5.51817	0.03559	2.2731	0.04728
284.045	0.29912	288.182	0.25548	298.486	0.17807	277.251	0.11559	4.90102	0.00955	3.76063	0.01561	3.56384	0.01608	3.69159	0.01512	5.95981	0.03554	2.3538	0.04726
282.942	0.29809	287.362	0.25487	298.357	0.17792	272.101	0.11376	5.2581	0.00951	4.02089	0.01558	3.77953	0.01605	3.94258	0.0151	6.67262	0.03549	2.4405	0.04724
281.506	0.29708	286.525	0.25428	297.929	0.1777	267.217	0.1116	5.56951	0.00948	4.28116	0.01555	4.0529	0.01603	4.19356	0.01507	7.47842	0.03545	2.5219	0.04723
280.541	0.29609	285.677	0.25371	297.543	0.17743	262.252	0.10906	5.99719	0.00947	4.54142	0.01552	4.18331	0.01601	4.44455	0.01504	7.9278	0.0354	2.6097	0.04721
279.211	0.29511	284.908	0.25316	297.168	0.17723	254.135	0.10619	6.35427	0.00946	4.80169	0.0155	4.41404	0.01598	4.69553	0.01502	8.41592	0.03537	2.6942	0.0472
277.364	0.29415	284.114	0.25261	296.835	0.17718	247.325	0.10316	6.93142	0.00945	5.06195	0.01548	4.73256	0.01596	4.94652	0.01499	9.03576	0.03533	2.7758	0.04718
275.791	0.2932	283.495	0.25207	296.472	0.17707	241.537	0.10023	7.0133	0.00945	5.32222	0.01546	5.07866	0.01594	5.19751	0.01497	9.57037	0.03531	2.8641	0.04715
274.992	0.29227	282.663	0.25152	296.136	0.17704	236.601	0.09745	7.28851	0.00946	5.58248	0.01544	5.48244	0.01592	5.44849	0.01494	10.2445	0.03529	2.9482	0.04713
273.074	0.29129	281.967	0.25097	295.685	0.17693	232.293	0.09495	7.71618	0.00947	5.84275	0.01543	5.75581	0.0159	5.69948	0.01491	11.0038	0.03528	3.0343	0.04711
272.483	0.29029	281.321	0.2504	295.293	0.17682	228.466	0.09285	8.07742	0.00948	6.10302	0.01541	6.10192	0.01589	5.95046	0.01489	11.4502	0.03527	3.116	0.04708
271.823	0.2893	280.695	0.24983	294.853	0.1767	224.942	0.09099	8.38853	0.00947	6.36328	0.0154	6.24738	0.01588	6.20145	0.01486	12.0267	0.03527	3.2035	0.04706
271.126	0.28843	280.057	0.24926	294.46	0.17649	221.878	0.08941	8.73234	0.00947	6.62355	0.01538	6.61384	0.01587	6.45244	0.01484	12.6033	0.03527	3.2901	0.04703
270.505	0.28763	279.477	0.24869	294.134	0.17618	219.124	0.08799	9.07615	0.00948	6.88381	0.01537	6.89694	0.01586	6.70342	0.01482	13.1422	0.03527	3.3726	0.04702
269.879	0.28681	278.964	0.24814	293.763	0.17587	216.726	0.08671	9.46008	0.0095	7.14408	0.01536	7.07	0.01586	7.05582	0.01481	13.9402	0.03527	3.4608	0.047
269.311	0.28611	278.388	0.24761	293.331	0.17551	214.514	0.08548	9.82132	0.0095	7.40434	0.01536	7.35841	0.01585	7.20539	0.01479	14.5213	0.03528	3.5422	0.04696
268.692	0.28539	277.839	0.2471	292.941	0.17521	212.503	0.08436	10.1076	0.00951	7.66461	0.01535	7.61674	0.01584	7.45638	0.01478	15.0559	0.03529	3.6307	0.04694
268.078	0.28469	277.268	0.24662	292.534	0.17492	210.464	0.08333	10.4514	0.00952	7.92488	0.01533	7.86252	0.01584	7.70737	0.01477	15.486	0.03531	3.7124	0.0469
267.483	0.28399	276.847	0.24616	292.128	0.17464	208.73	0.08238	10.7952	0.00952	8.18514	0.01532	8.17991	0.01583	7.95835	0.01476	16.2182	0.03532	3.7978	0.04687
266.831	0.28334	276.382	0.24573	291.691	0.17431	207.079	0.08148	11.139	0.00953	8.44541	0.01531	8.4243	0.01583	8.20934	0.01475	16.7915	0.03534	3.8839	0.04685
266.241	0.28262	275.924	0.24531	291.242	0.17414	205.522	0.08061	11.4828	0.00955	8.57205	0.01529	8.70018	0.01583	8.46033	0.01474	17.2157	0.03537	3.9669	0.04682
265.675	0.28198	275.342	0.24491	290.949	0.17401	203.993	0.07982	11.8266	0.00956	8.86388	0.01527	8.93092	0.01582	8.71131	0.01473	17.7922	0.03541	4.0558	0.04679
265.008	0.28133	274.929	0.24451	290.469	0.17369	202.522	0.07909	12.1704	0.00956	9.09227	0.01526	9.20429	0.01582	8.9623	0.01472	18.3687	0.03544	4.1396	0.04677
264.399	0.28067	274.35	0.24412	290.089	0.17351	201.056	0.07836	12.5142	0.00957	9.44755	0.01524	9.30208	0.01581	9.21328	0.01471	18.9453	0.03549	4.2277	0.04676
263.728	0.28	273.868	0.24373	289.733	0.17315	199.765	0.07767	12.858	0.00958	9.96777	0.01523	9.60145	0.01581	9.47977	0.01471	19.5218	0.03553	4.3133	0.04674
263.114	0.27937	273.519	0.24334	289.324	0.17261	198.549	0.07697	13.2018	0.00959	10.5514	0.01522	9.77359	0.0158	9.81761	0.0147	20.0984	0.03559	4.3951	0.04673
262.517	0.27872	273.051	0.24295	288.97	0.17221	197.326	0.07634	13.5456	0.0096	11.059	0.01522	10.0051	0.01579	10.3075	0.01469	20.6749	0.03564	4.4798	0.04672
261.898	0.27813	272.562	0.24256	288.509	0.1718	196.178	0.07571	13.8895	0.0096	11.4904	0.01522	10.5519	0.01579	10.7467	0.01468	21.2515	0.03569	4.5666	0.0467
261.315	0.27758	272.239	0.24217	288.093	0.17157	195.018	0.07511	14.2333	0.00961	12.3989	0.01523	10.8513	0.01578	11.3294	0.01468	21.9207	0.03574	4.6544	0.04668
260.682	0.27694	271.717	0.24178	287.868	0.17155	193.935	0.07451	14.5771	0.00963	13.1823	0.01525	11.6061	0.01578	12.0051	0.01467	22.4046	0.03579	4.7647	0.04667
259.979	0.27628	271.265	0.2414	287.333	0.17149	192.81	0.07396	14.9209	0.00966	13.8685	0.01527	12.5727	0.01578	12.5878	0.01467	22.9811	0.03586	4.8147	0.04666
259.435	0.27562	270.834	0.24103	286.984	0.17136	191.732	0.07341	15.2647	0.00969	14.914	0.0153	13.3639	0.01579	13.4155	0.01468	23.5577	0.03592	4.9013	0.04663
258.827	0.27504	270.344	0.24066	286.493	0.17127	190.701	0.07285	15.6085	0.00971	15.7685	0.01534	14.2659	0.01581	13.7111	0.01469	24.1342	0.03599	4.9941	0.04662
258.226	0.27446	270.099	0.24029	286.009	0.17121	189.67	0.07231	15.9523	0.00974	16.5958	0.01538	15.0874	0.01583	14.2281	0.01471	24.7108	0.03606	5.0791	0.04661
257.72	0.27381	269.595	0.23993	285.59	0.17088	188.745	0.07181	16.2961	0.00977	17.4331	0.01542	15.9489	0.01587	15.0255	0.01474	25.2873	0.03615	5.1622	0.04658
257.092	0.27324	269.136	0.23955	285.186	0.17063	187.789	0.07133	16.6399	0.0098	18.1172	0.01547	17.0481	0.01591	15.97	0.01477	26.0194	0.03623	5.2488	0.04657
256.445	0.27267	268.842	0.23917	284.843	0.17038	186.871	0.07085	16.9837	0.00981	19.4103	0.01552	18.0811	0.01595	17.3355	0.01481	26.6004	0.03631	5.331	0.04653
255.853	0.27205	268.375	0.23877	284.491	0.16998	185.936	0.0704	17.3275	0.00981	19.9166	0.01557	18.7696	0.016	17.6944	0.01484	27.0498	0.03639	5.418	0.04651
255.32	0.27134	268.056	0.23837	283.888	0.16971	184.964	0.06996	17.6713	0.00983	20.7477	0.01563	19.4759	0.01605	18.6907	0.01489	27.5935	0.03648	5.5057	0.0465
254.63	0.27059	267.637	0.23796	283.476	0.16945	184.008	0.06951	18.0151	0.00984	21.5993	0.01569	20.2314	0.01609	19.2759	0.01494	28.2973	0.03658	5.59	0.0465
254.039	0.26982	267.329	0.23754	283.111	0.16907	183.095	0.06907	18.3589	0.00987	22.4266	0.01576	21.287	0.01614	20.2652	0.01499	28.9171	0.03667	5.6749	0.0465
253.42	0.26915	266.917	0.23714	282.65	0.16874	182.184	0.06862	18.7028	0.0099	23.2716	0.01583	22.2198	0.01619	21.1288	0.01505	29.4517	0.03676	5.7616	0.04649
252.822	0.26852	266.597	0.23675	282.293	0.16854	181.278	0.06816	19.0466	0.00995	24.1209	0.01592	22.8618	0.01625	22.1712	0.01511	29.8997	0.03686	5.8438	0.0465
252.257	0.26786	266.14	0.23638	281.835	0.16827	180.309	0.06771	19.3904	0.00997	24.9278	0.016	23.7691	0.0163	22.6543	0.01518	30.4762	0.03698	5.9288	0.04649
251.572	0.26721	265.842	0.23603	281.455	0.16796	179.412	0.06729	19.7342	0.01	26.021	0.0161	24.5285	0.01637	23.7427	0.01525	31.0528	0.03711	6.0134	0.04648
250.959	0.26655	265.465	0.23569	281.082	0.16789	178.518	0.06687	20.078	0.01004	26.6043	0.01619	25.4352	0.01644	24.6127	0.01532	31.6293	0.03721	6.1008	0.04648
250.28	0.26586	265.05	0.23537	280.52	0.16771	177.731	0.06647	20.4218	0.01007	27.6299	0.01629	26.2941	0.01651	25.7235	0.01538	32.2059	0.03733	6.1859	0.04644
249.725	0.26514	264.669	0.23505	280.131	0.16737	176.793	0.0661	20.7656	0.01009	28.2897	0.01639	27.168	0.01657	26.3457	0.01545	32.7824	0.03744	6.2757	0.04642
249.127	0.26442	264.324	0.23471	279.717	0.16698	176.003	0.0657	21.1094	0.0101	29.2287	0.01651	28.0294	0.01665	27.1997	0.01552	33.359	0.03755	6.3558	0.04641
248.519	0.26364	263.944	0.23435	279.236	0.16676	175.061	0.06534	21.4532	0.01011	30.2564	0.01663	28.8694	0.01675	28.2886	0.01559	33.9355	0.03766	6.4421	0.04639
247.93	0.26285	263.506	0.23395	278.936	0.1666	174.242	0.06493	21.797	0.01016	30.9162	0.01675	29.7435	0.01685	28.9146	0.01566	34.512	0.03776	6.5284	0.04637
247.347	0.26212	263.168	0.23352	278.475	0.16642	173.369	0.06455	22.1408	0.01022	31.6122	0.01688	30.3041	0.01696	30.1485	0.01574	35.0886	0.03786	6.6108	0.04636
246.778	0.26135	262.858	0.23307	278.008	0.16624	172.429	0.06413	22.4846	0.01026	32.4334	0.01701	31.6894	0.01708	30.7126	0.01583	35.6651	0.03796	6.698	0.04636
246.244	0.26058	262.419	0.23259	277.577	0.16605	171.56	0.06373	22.8284	0.01028	33.8346	0.01715	32.6275	0.01719	31.4801	0.01592	36.2417	0.03808	6.7772	0.04635
245.622	0.25981	262.072	0.2321	277.147	0.16579	170.656	0.06334	23.1722	0.01032	34.3601	0.01729	33.3147	0.01731	32.3714	0.01602	36.8182	0.03821	6.866	0.04635
245.057	0.25909	261.679	0.23161	276.805	0.16567	169.752	0.06294	23.5161	0.01037	35.078	0.01742	34.3183	0.01742	33.145	0.01611	37.3948	0.03834	6.9503	0.04635
244.445	0.25835	261.422	0.23113	276.18	0.1654	168.953	0.06256	23.8599	0.01041	35.6532	0.01756	35.1364	0.01752	34.1276	0.01621	37.9713	0.03848	7.0379	0.04634
243.822	0.25759	261.048	0.23066	275.848	0.16512	168.139	0.06218	24.2037	0.01043	36.6176	0.0177	35.8236	0.01763	34.9798	0.01631	38.5479	0.03863	7.1202	0.04634
243.246	0.25679	260.673	0.23021	275.454	0.1649	167.338	0.0618	24.5475	0.01045	37.4421	0.01784	36.6417	0.01777	35.8021	0.01642	39.1244	0.03877	7.2039	0.04633
242.663	0.25595	260.171	0.22978	275.07	0.16478	166.409	0.06145	24.8913	0.0105	38.2511	0.01799	37.6453	0.0179	36.708	0.01653	39.701	0.03892	7.291	0.04631
241.964	0.25511	259.827	0.22938	274.69	0.16463	165.599	0.06107	25.2351	0.01056	39.0707	0.01814	38.5288	0.01805	37.598	0.01665	40.2775	0.03905	7.3681	0.0463
241.476	0.25429	259.576	0.229	274.135	0.16441	164.712	0.06069	25.5789	0.01063	39.902	0.0183	39.336	0.01821	38.441	0.01677	40.8541	0.03919	7.4606	0.0463
240.873	0.25351	259.193	0.22865	273.826	0.16423	163.889	0.0603	25.9227	0.01069	40.5881	0.01846	40.2196	0.01836	39.2724	0.01689	41.4306	0.03931	7.5446	0.04628
240.231	0.25266	258.834	0.22832	273.303	0.16405	162.99	0.05992	26.2665	0.01074	41.8021	0.01862	41.0922	0.01853	40.1741	0.01701	41.9271	0.03944	7.6293	0.04626
239.583	0.25177	258.45	0.22802	272.899	0.16379	162.072	0.05954	26.6103	0.01079	42.402	0.01879	41.9758	0.01869	41.0169	0.0171	42.5837	0.03958	7.7152	0.04623
239.033	0.25091	258.084	0.22775	272.534	0.16357	161.267	0.05916	26.9541	0.01082	43.2837	0.01897	42.8593	0.01886	41.8505	0.01718	43.1602	0.03973	7.7978	0.04622
238.448	0.25007	257.765	0.22749	272.088	0.16319	160.316	0.05877	27.2979	0.01085	43.2535	0.01916	43.732	0.01907	42.7591	0.01726	43.8563	0.03988	7.8827	0.04621
237.874	0.24923	257.363	0.22724	271.545	0.1628	159.389	0.05842	27.6417	0.01088	44.6126	0.01935	44.7356	0.01929	43.6307	0.01734	44.4588	0.04003	7.9711	0.0462
237.367	0.24838	257.01	0.22699	271.062	0.16233	158.618	0.05806	27.9855	0.01092	45.9849	0.01955	45.99	0.01954	44.7644	0.01742	44.9918	0.04017	8.0561	0.04621
236.794	0.24754	256.755	0.22671	270.572	0.16186	157.768	0.05771	28.3294	0.01096	46.9613	0.01977	47.1899	0.01976	45.8928	0.01751	45.5943	0.04029	8.1384	0.04621
236.237	0.24674	256.307	0.22639	270.114	0.16139	156.985	0.05734	28.6732	0.011	47.3236	0.02	48.128	0.02002	46.5386	0.01762	46.0577	0.04042	8.2266	0.04621
235.649	0.24595	256.041	0.22601	269.722	0.16096	156.065	0.05698	29.017	0.01104	48.3664	0.02022	48.6298	0.02025	47.1187	0.01774	46.6603	0.04055	8.3095	0.04621
235.133	0.24521	255.657	0.22558	269.369	0.16067	155.173	0.05661	29.3608	0.01109	49.4023	0.02044	49.5024	0.02047	47.6419	0.01788	47.1932	0.04068	8.3942	0.04619
234.411	0.24447	255.343	0.22508	268.924	0.16038	154.241	0.05623	29.7046	0.01113	50.0884	0.02066	50.4514	0.02068	48.0535	0.01802	47.7726	0.04083	8.4765	0.04618
233.89	0.24371	254.884	0.22453	268.479	0.16016	153.424	0.05585	30.0484	0.01117	50.8993	0.02088	51.1053	0.02087	49.9017	0.01816	48.3492	0.04098	8.5639	0.04616
233.255	0.24297	254.607	0.22395	268.032	0.15998	152.457	0.05547	30.3922	0.01121	51.6718	0.0211	52.2201	0.02107	51.2194	0.01831	48.9257	0.04114	8.5492	0.04615
232.737	0.24225	254.211	0.22336	267.562	0.15972	151.542	0.05509	30.736	0.01129	52.412	0.02133	52.8231	0.02129	52.0405	0.01847	49.5022	0.04131	8.6735	0.04614
232.15	0.24152	253.842	0.22276	267.243	0.15938	150.681	0.05471	31.0798	0.01137	53.2292	0.02157	53.3286	0.02151	52.6458	0.01863	50.0788	0.04148	8.7887	0.04612
231.572	0.24081	253.53	0.22217	266.771	0.15899	149.693	0.05432	31.4236	0.01144	54.0307	0.02181	54.0838	0.02173	53.2513	0.01879	50.6553	0.04164	8.8929	0.04611
231.006	0.24005	253.08	0.2216	266.175	0.15863	148.831	0.05395	31.7674	0.01151	54.8763	0.02207	54.782	0.02196	53.9125	0.01897	51.2319	0.0418	8.9781	0.04609
230.456	0.23938	252.785	0.22106	265.789	0.15831	147.979	0.05358	32.1112	0.01157	55.7641	0.02231	55.5891	0.0222	54.6932	0.01914	51.8084	0.04197	9.0706	0.04608
229.851	0.23873	252.452	0.22053	265.267	0.15796	147.153	0.05323	32.455	0.01163	56.6827	0.02256	56.2873	0.02246	55.5822	0.01931	52.385	0.04213	9.1562	0.04607
229.294	0.23809	252	0.22001	264.771	0.15763	146.383	0.05287	32.7989	0.0117	57.5363	0.02281	57.2472	0.02272	56.5561	0.01947	52.9615	0.04229	9.2416	0.04605
228.785	0.23742	251.654	0.2195	264.415	0.1572	145.589	0.05254	33.1427	0.01178	58.4728	0.02307	58.1822	0.02301	57.4485	0.01961	53.5381	0.04244	9.3218	0.04605
228.22	0.23678	251.353	0.219	263.906	0.15691	144.984	0.05221	33.4865	0.01185	59.344	0.02332	59.2532	0.02332	58.5241	0.01973	54.3249	0.0426	9.4113	0.04604
227.628	0.23618	251.022	0.2185	263.496	0.15669	144.387	0.0519	33.8303	0.01191	60.0922	0.02357	60.1004	0.02359	59.3698	0.01986	54.8579	0.04275	9.493	0.04605
227.076	0.23557	250.643	0.21803	263.06	0.15643	143.783	0.05162	34.1741	0.01196	60.9075	0.02383	60.9649	0.02386	60.1547	0.01999	55.2677	0.04292	9.5783	0.04604
226.557	0.23494	250.244	0.21759	262.632	0.15602	143.221	0.05135	34.5179	0.012	61.6801	0.02408	61.7723	0.02411	61.0271	0.02013	55.8443	0.04309	9.6601	0.04602
225.961	0.23433	249.856	0.21717	262.212	0.15571	142.702	0.05112	34.8617	0.01204	62.4712	0.02434	62.5291	0.02437	61.8267	0.0203	56.4208	0.04326	9.7474	0.04601
225.42	0.23377	249.589	0.21678	261.623	0.15539	142.08	0.0509	35.2055	0.0121	63.2526	0.02458	63.2522	0.02462	62.6176	0.02048	56.9973	0.04342	9.8358	0.046
224.784	0.2331	249.293	0.21642	261.142	0.15508	141.726	0.0507	35.5493	0.01216	64.0569	0.0248	64.0259	0.0249	63.4521	0.02066	57.5739	0.0436	9.9145	0.04602
224.241	0.23252	248.961	0.21608	260.565	0.15464	141.175	0.0505	35.8931	0.01224	64.8727	0.02502	64.8606	0.0252	64.281	0.02083	58.1504	0.04379	10.0024	0.04603
223.689	0.23188	248.555	0.21575	260.127	0.15426	140.707	0.0503	36.2369	0.01233	65.7538	0.02525	65.7955	0.02551	65.1597	0.02099	58.727	0.04398	10.0056	0.04604
223.121	0.23118	248.225	0.2154	259.703	0.15374	140.199	0.05012	36.5807	0.01244	66.674	0.02547	66.7605	0.02584	66.0968	0.02113	59.3035	0.04417	10.0051	0.04603
222.547	0.23048	247.89	0.21503	259.24	0.1534	139.716	0.0499	36.9245	0.01252	67.543	0.0257	67.6908	0.02617	67.0332	0.02125	59.8801	0.04434	10.0036	0.04601
221.984	0.22983	247.572	0.21462	258.832	0.15313	139.335	0.04973	37.2683	0.01257	68.3592	0.02594	68.5578	0.02645	67.8937	0.02137	60.4566	0.04449	10.3335	0.04599
221.412	0.22909	247.253	0.21416	258.314	0.15281	138.812	0.04954	37.6122	0.01261	69.1993	0.0262	69.3936	0.02672	68.7141	0.02149	61.0332	0.04463	10.7455	0.04594
220.819	0.2284	246.873	0.21368	257.866	0.1524	138.48	0.04937	37.956	0.01267	69.9481	0.02647	70.2473	0.02698	69.5354	0.02161	61.6097	0.04477	11.4865	0.04589
220.18	0.22759	246.606	0.21316	257.43	0.15212	138.052	0.04921	38.2998	0.01276	70.8374	0.02674	71.162	0.02723	70.4132	0.02175	62.1863	0.04489	12.3332	0.04583
219.692	0.22682	246.249	0.21262	257	0.15183	137.573	0.04903	38.6436	0.01285	71.6778	0.02702	72.0035	0.02748	71.3164	0.02189	62.7628	0.04501	13.1838	0.04578
219.157	0.22612	245.842	0.21208	256.464	0.1516	137.195	0.04887	38.9874	0.01295	72.5416	0.02729	72.8148	0.02775	72.201	0.02202	63.3394	0.04517	14.0759	0.04575
218.804	0.22557	245.494	0.21155	256.038	0.15127	136.754	0.04871	39.3312	0.01305	73.3461	0.02757	73.6591	0.02802	73.0707	0.02216	63.9159	0.04536	14.987	0.04573
218.307	0.22481	245.233	0.21105	255.515	0.15108	136.307	0.04854	39.675	0.01314	74.1709	0.02787	74.4448	0.02827	73.8977	0.02231	64.4925	0.04557	16.1405	0.04571
217.909	0.22426	244.868	0.21059	255.095	0.15074	135.865	0.04837	40.0188	0.01321	74.9724	0.02816	75.3237	0.02852	74.7132	0.02246	65.069	0.04577	16.9243	0.0457
217.475	0.22363	244.529	0.21017	254.659	0.15044	135.529	0.0482	40.3626	0.01327	75.8791	0.02845	76.2107	0.02878	75.6142	0.02263	65.6455	0.04596	17.7664	0.04571
217.121	0.22304	244.13	0.20979	254.171	0.15014	135.06	0.04805	40.7064	0.01333	76.7174	0.02873	77.1418	0.02904	76.544	0.02281	66.2221	0.04614	18.4382	0.04571
216.637	0.22247	243.773	0.20944	253.737	0.14968	134.651	0.04789	41.0502	0.01339	77.5748	0.02901	78.0272	0.0293	77.4233	0.02302	66.7986	0.04632	19.1927	0.04574
216.295	0.22192	243.442	0.20911	253.165	0.14918	134.24	0.04774	41.394	0.01348	78.3709	0.02927	78.8732	0.02956	78.2548	0.02323	67.3752	0.04652	20.0018	0.04577
215.767	0.22122	243.144	0.20881	252.64	0.14864	133.782	0.04761	41.7378	0.01357	79.2099	0.02952	79.6721	0.02983	79.0959	0.02346	67.9517	0.04673	20.8471	0.04583
215.202	0.2205	242.65	0.20852	252.169	0.14828	133.414	0.04745	42.0817	0.01365	79.9939	0.02975	80.5459	0.0301	79.9313	0.02367	68.5283	0.04694	21.7181	0.04589
214.848	0.22008	242.389	0.20823	251.762	0.14781	132.916	0.04732	42.4255	0.01373	80.891	0.02998	81.4493	0.03036	80.8307	0.02389	69.1048	0.04716	22.5488	0.04597
214.268	0.21942	242.03	0.20793	251.174	0.14738	132.477	0.04717	42.7693	0.0138	81.7749	0.03022	82.3357	0.03064	81.734	0.02409	69.6814	0.04737	23.4093	0.04606
213.577	0.21848	241.786	0.20763	250.774	0.14702	132.123	0.04699	43.1131	0.01386	82.5889	0.03046	83.1937	0.03091	82.6072	0.02431	70.2579	0.04757	24.2298	0.04616
213.059	0.2179	241.44	0.20732	250.116	0.14671	131.657	0.04684	43.4569	0.01391	83.3966	0.0307	84.0011	0.03118	83.4566	0.02453	70.8345	0.04774	25.1008	0.04626
212.374	0.21697	240.998	0.20699	249.736	0.14637	131.242	0.04667	43.8007	0.01399	84.2016	0.03095	84.821	0.03148	84.2802	0.02475	71.411	0.04791	25.9168	0.04636
211.675	0.21628	240.75	0.20664	249.225	0.14606	130.77	0.04652	44.1445	0.01408	84.9598	0.03119	85.7549	0.03178	85.1335	0.02497	71.9875	0.04808	26.7776	0.04645
211.116	0.21557	240.429	0.20628	248.756	0.14563	130.406	0.04637	44.4883	0.01418	85.881	0.03145	86.6478	0.03209	86.0386	0.02519	72.5641	0.04827	27.6161	0.04656
210.522	0.21486	240.016	0.20592	248.458	0.14536	129.891	0.0462	44.8321	0.01428	86.775	0.0317	87.497	0.03242	86.9096	0.0254	73.1406	0.04847	28.4514	0.04666
209.853	0.21415	239.65	0.20555	247.842	0.14502	129.508	0.04606	45.1759	0.01438	87.5986	0.03196	88.3489	0.03274	87.7672	0.02561	73.7172	0.04868	29.2924	0.04677
209.283	0.21345	239.373	0.20518	247.392	0.14479	129.139	0.0459	45.5197	0.01447	88.4133	0.03222	89.1998	0.03304	88.6667	0.0258	74.2937	0.0489	30.1605	0.04688
208.696	0.21266	238.98	0.20482	246.898	0.14436	128.75	0.04576	45.8635	0.01456	89.2201	0.0325	90.0135	0.03332	89.4968	0.02599	74.8703	0.04911	30.978	0.047
208.218	0.21194	238.726	0.20448	246.407	0.14402	128.376	0.04561	46.2073	0.01465	90.0222	0.03279	90.916	0.03359	90.3201	0.02617	75.4468	0.04931	31.8391	0.04711
207.578	0.21119	238.4	0.20414	245.939	0.14363	128.024	0.04544	46.5511	0.01474	90.8641	0.03308	91.7942	0.03385	91.2373	0.02637	76.0234	0.04949	32.6475	0.04723
207.1	0.21048	238.089	0.2038	245.427	0.1433	127.624	0.04528	46.895	0.01483	91.7634	0.03337	92.6862	0.03412	92.136	0.02657	76.5999	0.04967	33.5172	0.04735
206.51	0.20977	237.664	0.20346	245.025	0.14295	127.213	0.04511	47.2388	0.01493	92.5847	0.03365	93.5487	0.03439	92.9891	0.02676	77.1765	0.04985	34.3588	0.04749
205.986	0.2091	237.37	0.20312	244.473	0.14263	126.891	0.04498	47.5826	0.01501	93.4314	0.03391	94.3239	0.03466	93.8429	0.02695	77.753	0.05003	35.1879	0.04763
205.409	0.20839	237.045	0.20275	244.019	0.14223	126.46	0.04484	47.9264	0.01509	94.2227	0.03418	95.1968	0.03493	94.6693	0.02713	78.3296	0.05023	35.995	0.0478
204.839	0.20771	236.69	0.20237	243.554	0.14194	126.054	0.04469	48.2702	0.01516	95.0248	0.03442	96.1555	0.03521	95.5347	0.0273	78.9061	0.05044	36.9031	0.04795
204.237	0.20706	236.353	0.20197	242.868	0.14161	125.686	0.04457	48.614	0.01524	95.9024	0.03466	96.9825	0.03549	96.4579	0.02747	79.4827	0.05063	37.7306	0.04812
203.667	0.2064	236.066	0.20155	242.468	0.14124	125.244	0.04444	48.9578	0.01531	96.7458	0.03489	97.8581	0.03576	97.2925	0.02763	80.0592	0.05084	38.5181	0.04828
203.166	0.20573	235.744	0.20111	241.848	0.14087	124.879	0.04433	49.3016	0.01539	97.5863	0.03514	98.6986	0.03603	98.1579	0.02779	80.6358	0.05105	39.3886	0.04843
202.639	0.20505	235.348	0.20067	241.315	0.14056	124.52	0.0442	49.6454	0.01548	98.3959	0.03538	99.5553	0.03628	99.0198	0.02794	81.2123	0.05125	40.269	0.04858
202.083	0.20435	235.053	0.20024	240.752	0.14012	124.076	0.04404	49.9892	0.01558	99.2451	0.03562	100.411	0.03654	99.9048	0.0281	81.7888	0.05145	41.0791	0.04872
201.557	0.20363	234.798	0.19981	240.241	0.13974	123.72	0.0439	50.333	0.01569	100.046	0.03587	101.369	0.0368	100.782	0.02826	82.3654	0.05165	41.8899	0.04887
201.02	0.20294	234.309	0.1994	239.798	0.13933	123.311	0.04375	50.6768	0.01579	100.948	0.03611	102.251	0.03706	101.738	0.02841	82.9419	0.05185	42.8551	0.04904
200.472	0.20225	234.064	0.19902	239.364	0.13897	122.898	0.0436	51.0206	0.0159	101.859	0.03636	103.06	0.03733	102.559	0.02855	83.5185	0.05206	43.6135	0.04922
199.853	0.20152	233.731	0.19866	238.846	0.13847	122.53	0.04344	51.3644	0.01599	102.642	0.0366	103.96	0.03757	103.459	0.02869	84.095	0.05228	44.6311	0.0494
199.42	0.20089	233.365	0.19832	238.284	0.13801	122.094	0.04328	51.7083	0.01609	103.511	0.03685	104.743	0.03781	104.271	0.02884	84.6716	0.0525	45.5033	0.04958
198.882	0.20025	233.049	0.198	237.772	0.13758	121.708	0.04314	52.0521	0.01618	104.329	0.03709	105.567	0.03804	105.085	0.029	85.2481	0.05271	46.6847	0.04978
198.398	0.19959	232.714	0.19769	237.287	0.13717	121.359	0.04299	52.3959	0.01628	105.068	0.03735	106.41	0.03825	105.889	0.02917	85.8247	0.05293	47.2318	0.04999
197.805	0.19892	232.325	0.19739	236.873	0.13675	120.909	0.04284	52.7397	0.01636	105.867	0.03763	107.231	0.0385	106.746	0.02935	86.4012	0.05312	47.874	0.05022
197.322	0.19824	231.966	0.19709	236.372	0.13645	120.511	0.04271	53.0835	0.01644	106.674	0.03789	108	0.03875	107.547	0.02954	86.9778	0.05332	49.103	0.05047
196.815	0.19756	231.722	0.19678	235.762	0.13604	120.099	0.04259	53.4273	0.01651	107.48	0.03816	108.888	0.03904	108.409	0.02975	87.5543	0.0535	50.1972	0.05071
196.311	0.19683	231.299	0.19647	235.301	0.13563	119.71	0.04246	53.7711	0.01661	108.299	0.03843	109.702	0.03935	109.227	0.02998	88.1308	0.05368	51.1566	0.05095
195.754	0.19613	231.025	0.19614	234.729	0.1353	119.398	0.04235	54.1149	0.01672	109.097	0.0387	110.703	0.03966	110.092	0.0302	88.7074	0.05385	52.1745	0.05119
195.329	0.19542	230.641	0.19579	234.248	0.13504	118.992	0.04222	54.4587	0.01683	109.945	0.03896	111.647	0.03997	111.203	0.03043	89.2839	0.05402	52.8682	0.05138
194.802	0.19471	230.32	0.19542	233.677	0.13457	118.675	0.04208	54.8025	0.01692	110.95	0.03923	112.647	0.04025	112.176	0.03065	89.8605	0.05421	53.3172	0.05155
194.279	0.19397	229.998	0.19502	233.165	0.13413	118.287	0.04194	55.1463	0.01702	111.869	0.0395	113.637	0.04051	113.149	0.03087	90.437	0.0544	53.8349	0.0517
193.747	0.19326	229.681	0.19459	232.585	0.13372	117.939	0.04181	55.4901	0.01711	112.833	0.03977	114.499	0.04077	113.944	0.03106	91.0136	0.05461	54.3506	0.05186
193.209	0.19261	229.459	0.19413	232.098	0.13335	117.591	0.04164	55.8339	0.01721	113.678	0.04003	115.254	0.04101	114.773	0.03123	91.5901	0.0548	55.0291	0.05202
192.741	0.19192	229.05	0.19364	231.512	0.13297	117.242	0.04149	56.1778	0.01731	114.486	0.0403	116.083	0.04127	115.586	0.03139	92.1667	0.05498	56.0041	0.05223
192.264	0.19126	228.729	0.19314	230.956	0.13268	116.845	0.04137	56.5216	0.01741	115.272	0.04056	116.847	0.04153	116.333	0.03152	92.7432	0.05518	56.957	0.05246
191.712	0.19062	228.437	0.19262	230.466	0.13234	116.468	0.04124	56.8654	0.01749	116.028	0.04081	117.605	0.04179	117.193	0.03167	93.3198	0.05539	57.9021	0.05271
191.179	0.18997	228.192	0.19212	229.929	0.13197	116.132	0.04112	57.2092	0.01758	116.755	0.04105	118.433	0.04203	117.934	0.03181	93.8963	0.05561	58.7762	0.05297
190.64	0.18928	227.808	0.19165	229.331	0.13167	115.76	0.04102	57.553	0.01768	117.553	0.04128	119.164	0.04224	118.719	0.03197	94.4729	0.05582	59.8574	0.05323
190.07	0.18862	227.493	0.19121	228.851	0.1313	115.389	0.0409	57.8968	0.01779	118.274	0.04152	119.963	0.04242	119.503	0.03213	95.0494	0.05603	60.7123	0.05346
189.582	0.18796	227.219	0.19082	228.309	0.13082	115.082	0.04079	58.2406	0.01789	119.133	0.04177	120.936	0.04258	120.355	0.0323	95.626	0.05624	61.4874	0.05371
189.158	0.18732	226.905	0.19047	227.781	0.13032	114.628	0.04067	58.5844	0.01798	119.876	0.04202	121.033	0.04272	121.264	0.03248	96.2025	0.05644	62.2584	0.05393
188.685	0.1866	226.488	0.19015	227.292	0.12986	114.346	0.04055	58.9282	0.01809	120.915	0.04229	121.898	0.04286	122.241	0.03266	96.779	0.05663	63.0086	0.05416
188.227	0.18592	226.231	0.18985	226.649	0.12941	113.917	0.04043	59.272	0.01819	121.826	0.04257	123.047	0.04303	122.764	0.03284	97.3556	0.05683	63.7337	0.05438
187.731	0.18523	225.915	0.18955	226.108	0.12895	113.564	0.04031	59.6158	0.0183	122.967	0.04287	123.612	0.04323	123.684	0.03301	97.9321	0.05702	64.4793	0.05461
187.231	0.18453	225.569	0.18925	225.607	0.12859	113.222	0.04017	59.9596	0.0184	123.697	0.04318	124.095	0.04344	124.661	0.0332	98.5087	0.05721	65.3538	0.05484
186.779	0.18387	225.249	0.18893	225.014	0.12818	112.804	0.04002	60.3034	0.01849	125.06	0.04346	124.478	0.04366	125.775	0.03341	99.0852	0.05741	66.298	0.05506
186.251	0.18319	224.984	0.18859	224.494	0.1279	112.475	0.03988	60.6472	0.01858	125.884	0.04371	126.292	0.0439	126.49	0.03361	99.6618	0.05762	67.2533	0.05531
185.695	0.18254	224.604	0.18826	223.832	0.1275	112.059	0.03974	60.9911	0.01869	126.431	0.04393	125.826	0.04415	127.411	0.03384	100.238	0.05782	68.051	0.05555
185.25	0.18186	224.231	0.18793	223.37	0.1271	111.706	0.0396	61.3349	0.01881	127.025	0.04414	127.257	0.0444	128.32	0.03405	100.815	0.058	68.9222	0.05579
184.713	0.18122	224.013	0.18762	222.734	0.12668	111.353	0.03946	61.6787	0.01892	127.477	0.04432	128.405	0.04469	129.763	0.03428	101.391	0.05818	69.7306	0.05605
184.204	0.18054	223.719	0.18733	222.165	0.12629	110.967	0.03936	62.0225	0.01902	128.071	0.04449	129.354	0.04498	130.683	0.0345	101.968	0.05836	70.6247	0.05629
183.701	0.17988	223.389	0.18707	221.53	0.1258	110.565	0.03924	62.3663	0.01912	128.733	0.04468	130.419	0.04528	131.592	0.03471	102.545	0.05856	71.4854	0.05654
183.263	0.17922	223.016	0.18681	221	0.12534	110.15	0.03911	62.7101	0.01922	129.53	0.04491	131.949	0.04562	132.705	0.03491	103.121	0.05876	72.3425	0.05678
182.707	0.17859	222.702	0.18654	220.321	0.12491	109.84	0.03899	63.0539	0.0193	130.306	0.04517	132.998	0.04595	133.353	0.0351	103.698	0.05896	73.1828	0.05701
182.201	0.17793	222.326	0.18626	219.763	0.12458	109.49	0.03887	63.3977	0.01939	131.265	0.04547	134.346	0.04631	134.08	0.03528	104.274	0.05916	73.948	0.05723
181.744	0.17729	222.024	0.18595	219.151	0.12413	109.141	0.03873	63.7415	0.01949	132.216	0.04576	135.294	0.04667	134.671	0.03544	104.851	0.05938	74.7394	0.05745
181.172	0.17663	221.774	0.1856	218.671	0.12384	108.792	0.0386	64.0853	0.01961	133.136	0.04606	136.06	0.04704	135.455	0.03558	105.427	0.05963	75.5856	0.0577
180.718	0.176	221.47	0.18522	218.08	0.12344	108.46	0.03848	64.4291	0.01972	133.904	0.04636	137.025	0.04736	136.171	0.03572	106.004	0.05986	76.4604	0.05794
180.201	0.17535	221.031	0.18481	217.514	0.12303	108.141	0.03834	64.7729	0.01983	134.633	0.04667	137.973	0.04766	136.694	0.03585	106.58	0.06009	77.3189	0.05818
179.721	0.17472	220.741	0.18439	216.932	0.12257	107.819	0.0382	65.1167	0.01993	135.228	0.04696	138.739	0.04794	137.477	0.03602	107.157	0.06033	78.16	0.05844
179.226	0.1741	220.415	0.18397	216.47	0.1222	107.508	0.03808	65.4605	0.02005	136.282	0.04725	139.122	0.04817	138.33	0.03622	107.733	0.06057	78.9695	0.05871
178.766	0.17354	219.987	0.18356	215.816	0.12179	107.135	0.03796	65.8044	0.02016	136.964	0.04755	139.421	0.04841	139.114	0.03644	108.31	0.06081	79.8443	0.05897
178.309	0.17296	219.726	0.18317	215.32	0.12136	106.824	0.03785	66.1482	0.02026	137.962	0.04785	139.804	0.04862	140.023	0.03669	108.887	0.06102	80.692	0.05922
177.833	0.17236	219.398	0.18278	214.803	0.12097	106.448	0.03774	66.492	0.02035	138.564	0.04815	141.035	0.0489	141.204	0.03696	109.463	0.06121	81.5871	0.05948
177.354	0.17176	219.137	0.18241	214.097	0.12065	106.088	0.03762	66.8358	0.02046	139.412	0.04847	141.901	0.04923	142.113	0.03727	110.04	0.0614	82.4497	0.05972
176.945	0.17119	218.817	0.18204	213.532	0.12025	105.765	0.0375	67.1796	0.02057	140.125	0.04881	143.049	0.04962	143.488	0.03758	110.616	0.06161	83.2733	0.05999
176.421	0.17061	218.522	0.18167	212.847	0.11987	105.414	0.03737	67.5234	0.02067	140.748	0.04919	144.297	0.05007	144.456	0.03787	111.193	0.06182	84.0932	0.06025
175.933	0.17004	218.22	0.1813	212.363	0.11949	105.109	0.03727	67.8672	0.02076	142.14	0.04958	145.928	0.05054	145.63	0.03815	111.769	0.06202	84.8457	0.0605
175.449	0.16951	217.906	0.18093	211.776	0.11905	104.754	0.03712	68.211	0.02085	143.556	0.05	146.853	0.05101	146.662	0.0384	112.346	0.06223	85.7534	0.06075
175.004	0.16895	217.589	0.18056	211.19	0.1186	104.371	0.03699	68.5548	0.02097	144.897	0.05039	148.135	0.05145	147.561	0.03866	112.922	0.06245	86.6504	0.06101
174.509	0.16838	217.323	0.1802	210.504	0.11818	104.025	0.03688	68.8986	0.02109	146.057	0.05077	149.252	0.05185	148.256	0.03888	113.499	0.06265	87.4734	0.06126
174.038	0.16782	217.004	0.17987	209.893	0.11782	103.711	0.03676	69.2424	0.02121	147.086	0.05111	150.143	0.05221	148.955	0.03908	114.075	0.06285	88.3332	0.06152
173.584	0.1673	216.665	0.17955	209.415	0.11738	103.325	0.03664	69.5862	0.02132	147.911	0.0514	151.013	0.05249	149.584	0.03927	114.652	0.06305	89.1408	0.06177
172.998	0.16676	216.337	0.17924	208.86	0.11689	103.027	0.03652	69.93	0.02143	148.601	0.05164	151.64	0.05279	150.217	0.03945	115.229	0.06325	89.9415	0.06204
172.567	0.16625	216.049	0.17894	208.238	0.11655	102.622	0.03641	70.2738	0.02152	149.249	0.05185	152.139	0.05301	150.863	0.03965	115.805	0.06346	90.8554	0.06229
172.103	0.1657	215.777	0.17863	207.651	0.11609	102.257	0.03629	70.6177	0.02161	149.748	0.05206	152.493	0.0532	151.548	0.03984	116.382	0.06366	91.7072	0.06257
171.591	0.16514	215.404	0.17832	207.083	0.11555	101.935	0.03618	70.9615	0.02169	150.345	0.05229	152.953	0.05337	152.366	0.04003	116.958	0.06386	92.5417	0.06283
171.071	0.16459	215.118	0.178	206.488	0.11517	101.563	0.03607	71.3053	0.02176	150.918	0.05253	153.322	0.05356	153.197	0.04022	117.535	0.06406	93.3943	0.06309
170.58	0.16403	214.783	0.17766	205.887	0.11469	101.213	0.03594	71.6491	0.02185	151.498	0.05281	153.904	0.05377	154.07	0.04042	118.111	0.06427	94.1684	0.06334
170.103	0.1635	214.452	0.17731	205.284	0.1143	100.845	0.03583	71.9929	0.02195	152.183	0.05311	154.574	0.05399	154.994	0.04063	118.688	0.06447	95.0183	0.06359
169.617	0.16296	214.164	0.17695	204.73	0.11392	100.462	0.03571	72.3367	0.02205	152.97	0.05343	155.32	0.05425	155.945	0.04083	119.264	0.06467	95.92	0.06385
169.144	0.1624	213.872	0.17658	204.082	0.11356	100.15	0.03558	72.6805	0.02214	153.782	0.05376	156.293	0.05455	156.87	0.04104	119.841	0.06488	96.771	0.06412
168.649	0.16185	213.545	0.1762	203.508	0.11314	99.7383	0.03545	73.0243	0.02225	154.667	0.0541	157.374	0.05489	157.855	0.04127	120.417	0.06508	97.6076	0.06436
168.266	0.16134	213.234	0.17583	202.918	0.11265	99.4389	0.03531	73.3681	0.02237	155.592	0.05442	158.457	0.05529	158.76	0.0415	120.994	0.06528	98.4379	0.06463
167.803	0.16081	212.929	0.17546	202.203	0.11228	99.1095	0.03519	73.7119	0.0225	156.549	0.05474	159.587	0.05569	159.709	0.04174	121.571	0.06548	99.2645	0.06492
167.357	0.16029	212.649	0.1751	201.628	0.11181	98.7691	0.03505	74.0557	0.02263	157.538	0.05507	160.845	0.0561	160.648	0.04198	122.147	0.06566	100.059	0.06523
166.954	0.15975	212.246	0.17475	201.059	0.11141	98.4518	0.03494	74.3995	0.02275	158.513	0.05542	162.133	0.05652	161.576	0.04223	122.724	0.06585	101.017	0.06553
166.429	0.15922	211.947	0.17442	200.369	0.11098	98.1122	0.03482	74.7434	0.02285	159.503	0.05579	163.245	0.05693	162.556	0.04248	123.3	0.06603	101.918	0.06583
165.989	0.15868	211.685	0.17411	199.687	0.11051	97.7674	0.0347	75.0872	0.02294	160.445	0.05616	164.243	0.05731	163.407	0.04274	123.877	0.06621	102.746	0.06614
165.539	0.15816	211.293	0.17383	199.082	0.11015	97.4479	0.0346	75.431	0.02305	161.403	0.05654	165.159	0.05765	164.232	0.043	124.453	0.0664	103.591	0.06643
165.081	0.15765	210.964	0.17357	198.57	0.10974	97.1165	0.03448	75.7748	0.02317	162.288	0.05691	165.94	0.05797	165.021	0.04323	125.03	0.06659	104.382	0.06672
164.599	0.15715	210.709	0.17335	197.965	0.10936	96.7766	0.03439	76.1186	0.02325	163.091	0.05726	166.646	0.05827	165.753	0.04347	125.606	0.06676	105.216	0.067
164.145	0.15666	210.378	0.17315	197.308	0.10886	96.4514	0.03427	76.4624	0.02333	163.87	0.05759	167.26	0.05855	166.52	0.0437	126.183	0.06694	106.011	0.06725
163.639	0.1562	210.099	0.17295	196.758	0.10837	96.0999	0.03414	76.8062	0.02341	164.574	0.05789	167.794	0.05884	167.332	0.04392	126.759	0.06713	106.771	0.06751
163.21	0.15576	209.772	0.17275	196.061	0.10801	95.7808	0.03402	77.15	0.02351	165.301	0.05817	168.412	0.05914	168.091	0.04412	127.336	0.06732	107.54	0.06779
162.776	0.15531	209.538	0.17252	195.51	0.1075	95.4138	0.03389	77.4938	0.02363	166.063	0.05845	168.975	0.05941	168.941	0.04433	127.913	0.06752	108.344	0.06804
162.291	0.15489	209.219	0.17225	194.808	0.10706	95.0692	0.03378	77.8376	0.02373	166.758	0.05872	169.671	0.05971	169.76	0.04454	128.489	0.06772	109.149	0.06829
161.788	0.15447	208.878	0.17193	194.166	0.1065	94.7473	0.03364	78.1814	0.02383	167.505	0.05899	170.522	0.06	170.647	0.04477	129.066	0.06794	110.03	0.06855
161.324	0.15406	208.616	0.17156	193.522	0.1061	94.4246	0.03351	78.5252	0.02394	168.24	0.05926	171.385	0.0603	171.663	0.04501	129.642	0.06815	110.961	0.06885
160.894	0.15366	208.307	0.17114	192.872	0.10568	94.1298	0.0334	78.869	0.02408	169.018	0.05954	172.282	0.06064	172.666	0.04525	130.219	0.06837	111.964	0.06914
160.309	0.15324	208.008	0.1707	192.203	0.10521	93.8202	0.03326	79.2128	0.02422	169.884	0.05982	173.372	0.06099	173.586	0.0455	130.795	0.06859	112.937	0.06944
159.87	0.15287	207.69	0.17024	191.522	0.10475	93.4669	0.03315	79.5567	0.02432	170.785	0.06012	174.389	0.06133	174.57	0.04578	131.372	0.0688	113.757	0.06976
159.465	0.15251	207.341	0.16978	190.853	0.10428	93.1225	0.03302	79.9005	0.02439	171.768	0.06042	175.471	0.06171	175.448	0.04606	131.948	0.06903	114.646	0.07006
159.011	0.15215	207.061	0.16934	190.129	0.1039	92.8388	0.03287	80.2443	0.02446	172.722	0.06074	176.48	0.06209	176.22	0.04634	132.525	0.06925	115.438	0.07036
158.518	0.15178	206.813	0.16892	189.547	0.10352	92.4993	0.03279	80.5881	0.02454	173.698	0.06108	177.406	0.06245	177.067	0.04661	133.101	0.06947	116.252	0.07065
158.156	0.15138	206.487	0.16852	188.882	0.10299	92.1733	0.03271	80.9319	0.02464	174.607	0.06144	178.324	0.06279	177.923	0.04686	133.678	0.06969	117.04	0.07091
157.711	0.15101	206.201	0.16814	188.249	0.10248	91.852	0.03258	81.2757	0.02474	175.504	0.06181	179.274	0.0631	178.695	0.04709	134.255	0.06991	117.792	0.07116
157.222	0.15064	206.03	0.16777	187.604	0.10206	91.4926	0.03244	81.6195	0.02485	176.304	0.06215	180.136	0.06341	179.463	0.04729	134.831	0.07014	118.54	0.07143
156.869	0.15026	206.02	0.16741	186.966	0.10162	91.1849	0.03231	81.9633	0.02499	177.125	0.06248	180.923	0.0637	180.305	0.04748	135.408	0.07036	119.302	0.07171
156.355	0.14989	205.283	0.16705	186.286	0.10108	90.8336	0.03219	82.3071	0.02513	177.907	0.0628	181.847	0.06399	181.195	0.04764	135.984	0.07058	120.111	0.07197
155.969	0.14948	205.047	0.1667	185.702	0.10046	90.5409	0.03206	82.6509	0.02528	178.595	0.0631	182.589	0.06427	182.143	0.04781	136.561	0.07082	121.03	0.07221
155.458	0.14908	204.689	0.16635	184.99	0.09994	90.1871	0.03191	82.9947	0.02541	179.335	0.06339	183.439	0.06453	183.053	0.04799	137.137	0.07107	121.543	0.07243
155.07	0.14872	204.401	0.16602	184.304	0.09943	89.8486	0.03175	83.3385	0.02553	180.079	0.06371	184.091	0.06482	183.979	0.04818	137.714	0.07132	122.104	0.07259
154.638	0.14835	204.099	0.16569	183.585	0.09903	89.5375	0.03163	83.6823	0.02564	180.968	0.06407	184.786	0.06512	184.786	0.04839	138.29	0.07157	122.75	0.07272
154.168	0.14795	203.8	0.16539	182.919	0.09858	89.2369	0.03154	84.0262	0.02576	181.881	0.06447	185.617	0.06542	185.674	0.04862	138.867	0.07181	123.241	0.07285
153.726	0.14756	203.433	0.1651	182.167	0.09823	88.9058	0.03143	84.37	0.02586	182.68	0.06488	186.449	0.06574	186.501	0.04886	139.443	0.07205	123.563	0.07301
153.253	0.14717	203.135	0.16484	181.343	0.09786	88.6013	0.03128	84.7138	0.02596	183.52	0.06529	187.186	0.06609	187.378	0.04911	140.02	0.07229	123.802	0.0732
152.842	0.14677	202.911	0.1646	180.694	0.09754	88.2888	0.03113	85.0576	0.02606	184.461	0.06566	188	0.06645	188.184	0.04937	140.597	0.07253	124.601	0.07346
152.328	0.14641	202.535	0.16438	179.994	0.09715	87.9508	0.03097	85.4014	0.02615	185.232	0.06599	188.979	0.06684	188.977	0.04964	141.173	0.07275	125.892	0.07378
151.88	0.14601	202.197	0.16417	179.354	0.09668	87.6069	0.03088	85.7452	0.02625	186.119	0.06631	189.856	0.06723	189.855	0.04991	141.75	0.07298	127.196	0.07415
151.427	0.14561	201.964	0.16397	178.619	0.09611	87.3036	0.03077	86.089	0.02634	186.916	0.0666	190.847	0.06761	190.741	0.05022	142.326	0.0732	128.516	0.07457
150.955	0.14523	201.662	0.16377	177.906	0.09558	86.9887	0.03064	86.4328	0.02645	187.704	0.06689	191.863	0.06797	191.723	0.05053	142.903	0.07344	129.609	0.07502
150.558	0.14486	201.274	0.16355	177.2	0.09495	86.649	0.03052	86.7766	0.02657	188.594	0.0672	192.845	0.06832	192.635	0.05085	143.479	0.07367	130.661	0.07547
150.051	0.14445	200.913	0.16331	176.511	0.09455	86.3383	0.03042	87.1204	0.02668	189.435	0.06753	193.786	0.06865	193.461	0.05118	144.056	0.07391	132.19	0.07592
149.668	0.14402	200.717	0.16304	175.804	0.09412	85.9704	0.03029	87.4642	0.02679	190.215	0.06789	194.749	0.06896	194.354	0.0515	144.632	0.07415	133.565	0.07636
149.261	0.1436	200.389	0.16273	175.12	0.09375	85.689	0.03017	87.808	0.02689	191.137	0.06825	195.628	0.06927	195.211	0.05182	145.209	0.0744	134.855	0.07675
148.849	0.14321	200.011	0.16239	174.432	0.09339	85.3383	0.03005	88.1518	0.02699	192.057	0.06862	196.438	0.06959	196.069	0.05212	145.785	0.07466	135.739	0.07711
148.369	0.14277	199.766	0.16203	173.68	0.09297	84.9724	0.02991	88.4956	0.02708	192.937	0.069	197.2	0.06993	196.909	0.05241	146.362	0.0749	136.469	0.07743
147.983	0.14235	199.517	0.16164	172.901	0.09253	84.6805	0.02975	88.8394	0.02718	193.778	0.06937	198.003	0.07027	197.77	0.05269	146.939	0.07513	137.282	0.07769
147.561	0.14192	199.114	0.16125	172.131	0.09202	84.401	0.02967	89.1833	0.02729	194.53	0.06977	198.744	0.07062	198.548	0.05297	147.515	0.07536	137.928	0.07791
147.133	0.14148	198.913	0.16087	171.359	0.09147	84.0851	0.02958	89.5271	0.02739	195.454	0.07015	199.508	0.07096	199.325	0.05326	148.092	0.07561	138.404	0.0781
146.703	0.14107	198.619	0.1605	170.494	0.09101	83.7755	0.02946	89.8709	0.02748	196.148	0.07052	200.287	0.0713	200.224	0.05354	148.668	0.07586	138.811	0.07827
146.276	0.14064	198.3	0.16016	169.815	0.09048	83.4734	0.02938	90.2147	0.02757	196.923	0.07087	201.213	0.07165	201.232	0.0538	149.245	0.07611	139.302	0.07844
145.881	0.14021	197.993	0.15985	169.095	0.09003	83.1391	0.02924	90.5585	0.02767	197.72	0.07121	202.14	0.07197	202.198	0.05404	149.821	0.0764	139.779	0.0786
145.43	0.13981	197.67	0.15956	168.354	0.08945	82.8287	0.02916	90.9023	0.02778	198.528	0.07157	203.087	0.07231	203.107	0.05427	150.398	0.07669	140.34	0.07881
144.997	0.1394	197.437	0.15928	167.57	0.08896	82.4974	0.029	91.2461	0.02788	199.353	0.07192	203.976	0.07267	203.955	0.05447	150.974	0.07698	140.915	0.07908
144.573	0.13899	197.167	0.15902	166.877	0.08847	82.1805	0.02887	91.5899	0.02798	200.125	0.0723	204.94	0.07303	204.81	0.05467	151.551	0.07727	141.561	0.07945
144.147	0.1386	196.887	0.15875	166.046	0.08788	81.8519	0.02872	91.9337	0.02807	201.12	0.07267	205.764	0.07341	205.598	0.05488	152.127	0.07755	142.693	0.0799
143.708	0.13819	196.607	0.15847	165.288	0.08735	81.5359	0.02856	92.2775	0.02819	202.044	0.07304	206.577	0.07377	206.361	0.05507	152.704	0.0778	144.127	0.08041
143.271	0.13778	196.23	0.15818	164.484	0.08689	81.2377	0.02843	92.6213	0.02829	202.907	0.07343	207.314	0.07411	207.23	0.05529	153.281	0.07806	145.474	0.08097
142.819	0.13738	195.951	0.15787	163.734	0.08643	80.8915	0.02831	92.9651	0.02839	203.83	0.0738	208.203	0.07444	208.056	0.05552	153.857	0.07832	146.818	0.08154
142.382	0.137	195.703	0.15755	162.899	0.08604	80.5667	0.02818	93.3089	0.02849	204.69	0.07416	209	0.07474	208.991	0.05575	154.434	0.07857	148.003	0.08207
141.961	0.13661	195.39	0.15721	162.001	0.08557	80.2354	0.02807	93.6527	0.02859	205.475	0.07452	209.852	0.07505	209.907	0.056	155.01	0.07881	149.171	0.08258
141.53	0.13621	195.181	0.15687	161.191	0.08505	79.8959	0.02799	93.9966	0.0287	206.284	0.07487	210.769	0.07536	210.775	0.05626	155.587	0.07905	150.153	0.08302
141.069	0.1358	194.825	0.15651	160.236	0.08446	79.6091	0.02793	94.3404	0.02882	206.915	0.07524	211.77	0.07569	211.746	0.05653	156.163	0.07927	151.038	0.08343
140.643	0.13541	194.488	0.15614	159.456	0.08397	79.303	0.02777	94.6842	0.02894	207.739	0.07561	212.741	0.07605	212.655	0.05684	156.74	0.07948	151.905	0.08379
140.124	0.13502	194.198	0.15577	158.709	0.08344	78.99	0.02762	95.028	0.02907	208.537	0.07599	213.538	0.07641	213.464	0.05717	157.316	0.0797	152.46	0.0841
139.766	0.13463	193.88	0.1554	157.877	0.08292	78.6876	0.02748	95.3718	0.02919	209.506	0.07636	214.357	0.0768	214.3	0.05752	157.893	0.07993	153.076	0.08438
139.362	0.13427	193.647	0.15503	156.993	0.08245	78.3839	0.02733	95.7156	0.02931	210.371	0.07673	215.19	0.0772	215.103	0.05787	158.47	0.08015	153.577	0.08462
139.029	0.13385	193.382	0.15466	156.091	0.08201	78.0615	0.02717	96.0594	0.02943	211.255	0.07711	215.963	0.07757	215.934	0.05824	159.046	0.08037	154.045	0.08484
138.572	0.13345	193.125	0.15431	155.236	0.0815	77.7589	0.02703	96.4032	0.02953	212.229	0.0775	216.765	0.07794	216.788	0.0586	159.623	0.0806	154.604	0.08504
138.174	0.13306	192.722	0.15397	154.331	0.081	77.4281	0.02692	96.747	0.02963	213.043	0.07789	217.648	0.07829	217.551	0.05893	160.199	0.08085	155.138	0.08525
137.782	0.13264	192.445	0.15365	153.516	0.08046	77.12	0.02684	97.0908	0.02971	213.829	0.07828	218.468	0.07866	218.47	0.05924	160.776	0.0811	155.752	0.08549
137.403	0.13219	192.111	0.15335	152.6	0.07982	76.7989	0.02676	97.4346	0.02978	214.576	0.07867	219.387	0.07902	219.401	0.05953	161.352	0.08136	156.537	0.08575
136.959	0.13176	191.822	0.15305	151.594	0.07917	76.4515	0.02664	97.7784	0.02986	215.31	0.07906	220.306	0.07938	220.311	0.05981	161.929	0.08161	157.3	0.08603
136.604	0.13133	191.531	0.15276	150.613	0.07848	76.1357	0.02652	98.1222	0.02996	216.123	0.07943	221.325	0.07975	221.315	0.0601	162.505	0.08188	158.243	0.08635
136.128	0.13088	191.251	0.15246	149.666	0.07783	75.8114	0.02636	98.4661	0.03008	216.917	0.07981	222.275	0.0801	222.165	0.06039	163.082	0.08216	159.225	0.08672
135.704	0.13042	190.969	0.15215	148.752	0.07726	75.4866	0.02624	98.8099	0.0302	217.764	0.0802	223.075	0.08046	223.036	0.06068	163.658	0.08244	160.299	0.08713
135.281	0.12999	190.64	0.15183	147.754	0.07664	75.1463	0.02611	99.1537	0.03034	218.573	0.08059	223.937	0.08081	223.841	0.06097	164.235	0.08272	161.416	0.08756
134.874	0.12955	190.425	0.15149	146.906	0.07613	74.8281	0.02596	99.4975	0.03048	219.445	0.081	224.684	0.08117	224.568	0.06126	164.812	0.083	162.61	0.08802
134.471	0.1291	190.077	0.15116	145.85	0.07555	74.5113	0.02583	99.8413	0.0306	220.382	0.08141	225.405	0.08155	225.368	0.06155	165.388	0.08328	163.736	0.08847
134.064	0.12868	189.763	0.15082	144.926	0.07507	74.2257	0.02571	100.185	0.03069	221.313	0.08181	226.175	0.08193	226.179	0.06182	165.965	0.08359	164.742	0.08892
133.636	0.12826	189.505	0.1505	143.789	0.07451	73.9231	0.0256	100.529	0.03077	222.195	0.08222	227.025	0.08234	227.143	0.06209	166.541	0.08388	165.708	0.08935
133.224	0.12786	189.325	0.15019	142.827	0.07392	73.6093	0.02547	100.873	0.03083	222.976	0.08261	227.916	0.08275	227.977	0.06233	167.118	0.08416	166.597	0.08975
132.767	0.12746	188.986	0.1499	141.679	0.07328	73.2824	0.02534	101.217	0.0309	223.815	0.08299	228.778	0.08314	228.935	0.06258	167.694	0.08444	167.363	0.09013
132.363	0.12703	188.702	0.14963	140.625	0.07265	72.9586	0.02523	101.56	0.03098	224.61	0.08337	229.656	0.08353	229.793	0.06283	168.271	0.08474	167.987	0.09049
131.947	0.12661	188.451	0.14936	139.452	0.07211	72.6445	0.02509	101.904	0.03108	225.284	0.08375	230.695	0.08389	230.656	0.06307	168.847	0.08502	168.696	0.09081
131.504	0.12621	188.088	0.1491	138.426	0.07155	72.3514	0.02497	102.248	0.03117	226.049	0.08412	231.709	0.08425	232.127	0.06329	169.424	0.08529	169.395	0.09114
131.083	0.1258	187.745	0.14883	137.348	0.07096	71.9937	0.02486	102.592	0.03129	226.885	0.0845	232.546	0.0846	232.509	0.0635	170	0.08556	169.922	0.09144
130.628	0.12539	187.504	0.14857	136.216	0.07043	71.6973	0.02472	102.936	0.03141	227.781	0.08488	233.465	0.08495	233.407	0.06368	170.577	0.08584	170.768	0.09172
130.164	0.12499	187.302	0.1483	135.178	0.06985	71.4001	0.02459	103.279	0.03153	228.642	0.08526	234.223	0.08531	233.944	0.06385	171.154	0.08612	171.53	0.09201
129.774	0.1246	186.991	0.14803	133.956	0.0693	71.053	0.02447	103.623	0.03164	229.466	0.08562	234.966	0.08568	234.968	0.064	171.73	0.0864	172.234	0.09231
129.454	0.12419	186.667	0.14776	132.741	0.06867	70.692	0.02437	103.967	0.03175	230.412	0.08601	235.686	0.08606	235.844	0.06412	172.307	0.08667	173.071	0.09263
129.03	0.12381	186.422	0.14749	131.464	0.06803	70.3548	0.02429	104.311	0.03187	231.416	0.08635	236.489	0.08643	236.629	0.06424	172.883	0.08692	173.889	0.09297
128.617	0.12343	186.144	0.14723	130.273	0.06741	70.0457	0.02418	104.655	0.032	232.231	0.08667	237.324	0.08679	237.542	0.06435	173.46	0.08718	174.776	0.09333
128.251	0.12307	185.859	0.14697	128.852	0.06688	69.744	0.02406	104.998	0.03211	233.019	0.08698	238.234	0.08712	237.659	0.06449	174.036	0.08743	175.609	0.09372
127.809	0.12271	185.602	0.1467	128.05	0.06638	69.4246	0.02393	105.342	0.03221	233.844	0.08727	239.164	0.08743	238.12	0.06464	174.613	0.08766	176.611	0.09413
127.469	0.12237	185.241	0.14643	126.859	0.06591	69.1386	0.0238	105.686	0.0323	234.511	0.08757	239.749	0.0877	238.568	0.06479	175.189	0.0879	177.535	0.09458
127.035	0.12204	185.023	0.14615	125.756	0.0655	68.8171	0.02366	106.03	0.03239	235.25	0.08786	240.316	0.08796	239.095	0.06495	175.766	0.08814	178.453	0.09502
126.641	0.12166	184.698	0.14587	125.145	0.06515	68.5229	0.02352	106.374	0.03248	236.149	0.0882	240.958	0.08817	239.635	0.06512	176.342	0.08839	179.346	0.09544
126.208	0.12131	184.437	0.14557	124.762	0.06485	68.1799	0.02338	106.717	0.03256	236.842	0.08858	241.809	0.08838	240.847	0.06529	176.919	0.08867	180.284	0.09587
125.804	0.12094	184.142	0.14526	124.24	0.06455	67.8815	0.02324	107.061	0.03267	237.756	0.08899	242.444	0.08856	240.689	0.06546	177.496	0.08895	181.25	0.0963
125.371	0.12058	183.86	0.14494	123.887	0.06432	67.5877	0.02313	107.405	0.03278	238.609	0.08941	242.87	0.08872	242.058	0.06562	178.072	0.08924	182.193	0.09671
124.984	0.12023	183.551	0.14462	123.711	0.06414	67.2382	0.02303	107.749	0.0329	239.596	0.08982	243.406	0.08889	242.506	0.06576	178.649	0.08953	183.054	0.0971
124.613	0.11988	183.352	0.1443	123.292	0.064	66.9368	0.02292	108.093	0.03303	240.512	0.09019	243.721	0.08903	243.573	0.06591	179.225	0.08981	183.92	0.09747
124.156	0.11953	182.977	0.14399	123.121	0.06385	66.6181	0.02281	108.436	0.03314	241.303	0.09052	244.079	0.08917	243.019	0.06611	179.802	0.0901	184.708	0.09784
123.734	0.11917	182.736	0.14369	122.945	0.06372	66.274	0.02271	108.78	0.03323	242.118	0.09082	244.541	0.08932	244.123	0.06634	180.378	0.0904	185.526	0.09818
123.303	0.11885	182.399	0.14341	122.702	0.06357	65.913	0.0226	109.124	0.03332	242.719	0.09109	245.109	0.08951	245.135	0.06659	180.955	0.0907	186.24	0.09853
122.887	0.1185	182.117	0.14313	122.35	0.06331	65.5987	0.02247	109.468	0.03341	243.284	0.0913	245.849	0.08975	246.206	0.06691	181.531	0.091	186.991	0.09885
122.484	0.11813	181.835	0.14287	121.792	0.06299	65.2425	0.02234	109.812	0.03349	244.004	0.09153	246.559	0.09004	247.231	0.06725	182.108	0.09131	187.741	0.0992
122.092	0.11776	181.532	0.1426	120.564	0.06259	64.9233	0.02224	110.156	0.03357	244.627	0.09173	247.538	0.0904	248.566	0.06761	182.684	0.09163	188.395	0.09957
121.656	0.11741	181.28	0.14232	119.518	0.06207	64.6221	0.02208	110.499	0.03366	244.958	0.09192	248.478	0.09079	249.242	0.06796	183.261	0.09194	189.231	0.09994
121.248	0.11707	180.939	0.14203	118.363	0.06152	64.3299	0.02193	110.843	0.03375	245.406	0.09211	249.519	0.09122	250.201	0.06832	183.838	0.09223	189.941	0.1003
120.769	0.11674	180.674	0.14172	117.178	0.06096	64.0098	0.02181	111.187	0.03385	245.747	0.09232	250.498	0.09167	251.148	0.06864	184.414	0.09251	190.87	0.1007
120.388	0.1164	180.346	0.14139	116.022	0.0604	63.7254	0.02171	111.531	0.03396	246.194	0.09253	251.525	0.09211	252.118	0.06897	184.991	0.0928	191.764	0.10109
119.995	0.11609	180.058	0.14104	114.863	0.05981	63.3895	0.02156	111.875	0.03408	246.642	0.09277	252.379	0.09254	253.068	0.0693	185.567	0.09309	192.697	0.1015
119.624	0.1158	179.796	0.14068	113.662	0.05928	63.0533	0.02145	112.218	0.03418	247.186	0.09309	253.378	0.09296	254.058	0.06962	186.144	0.09339	193.642	0.10188
119.257	0.11551	179.53	0.14034	112.42	0.05876	62.7513	0.02134	112.562	0.03428	248.179	0.09343	254.287	0.09335	254.995	0.06992	186.72	0.09368	194.447	0.10227
118.9	0.11522	179.237	0.14002	111.134	0.0582	62.4352	0.02122	112.906	0.03438	249.19	0.09382	255.288	0.09371	255.828	0.07023	187.297	0.09398	195.438	0.10265
118.51	0.11493	179.015	0.13974	109.9	0.05767	62.1143	0.02112	113.25	0.0345	250.037	0.0942	256.238	0.09406	256.928	0.07051	187.873	0.09427	196.277	0.10307
118.162	0.11464	178.774	0.13949	108.84	0.05709	61.8007	0.02102	113.594	0.03458	251.05	0.09459	257.014	0.09442	257.75	0.07079	188.45	0.09455	197.185	0.10349
117.816	0.11438	178.515	0.13929	107.744	0.05648	61.4574	0.02087	113.937	0.03467	252.099	0.09502	257.989	0.09479	258.437	0.07105	189.026	0.0948	198.04	0.10392
117.433	0.11411	178.25	0.13912	106.554	0.05594	61.133	0.02075	114.281	0.03477	253.09	0.09546	258.923	0.09516	259.428	0.07132	189.603	0.09502	198.895	0.10433
117.093	0.11385	177.898	0.13895	105.465	0.05539	60.7751	0.02063	114.625	0.03487	253.947	0.0959	259.673	0.0955	260.228	0.07157	190.18	0.09523	199.656	0.10477
116.659	0.11358	177.673	0.13877	104.236	0.05482	60.438	0.02048	114.969	0.03496	254.869	0.09634	260.539	0.09582	261.093	0.07183	190.756	0.09548	200.533	0.10519
116.317	0.11331	177.433	0.13857	102.97	0.05422	60.0901	0.02034	115.313	0.03504	255.908	0.09678	261.278	0.09613	261.907	0.07209	191.333	0.09576	201.375	0.10563
115.932	0.11305	177.163	0.13833	101.743	0.05356	59.7922	0.02023	115.656	0.03511	256.714	0.09724	262.28	0.09645	262.8	0.07235	191.909	0.09603	202.177	0.106
115.546	0.11277	176.87	0.13804	100.4	0.05288	59.4722	0.02011	116	0.03518	257.524	0.09768	263.048	0.09674	263.656	0.07261	192.486	0.09632	203.076	0.10639
115.152	0.11252	176.636	0.1377	99.1758	0.05218	59.1613	0.02001	116.344	0.03526	258.479	0.09811	264.01	0.09702	264.469	0.0729	193.062	0.0966	203.782	0.10675
114.749	0.11223	176.333	0.13733	98.0456	0.05155	58.8386	0.01991	116.688	0.03536	259.265	0.09849	264.69	0.09733	265.336	0.07317	193.639	0.09689	204.629	0.10711
114.375	0.11196	176.044	0.13693	96.8391	0.0509	58.5062	0.01978	117.032	0.03545	260.086	0.09889	265.568	0.09767	266.014	0.07343	194.215	0.0972	205.481	0.1075
114.013	0.11167	175.807	0.13654	95.6522	0.0503	58.203	0.01967	117.375	0.03556	261.014	0.09929	266.377	0.098	266.921	0.07369	194.792	0.09748	206.274	0.10788
113.579	0.1114	175.535	0.13616	94.466	0.0498	57.8893	0.01955	117.719	0.03569	261.913	0.09969	267.119	0.09833	267.749	0.07394	195.368	0.09778	207.15	0.10826
113.199	0.11111	175.243	0.13581	93.3196	0.04922	57.537	0.01943	118.063	0.03583	262.775	0.10008	267.967	0.09865	268.437	0.07416	195.945	0.09808	208.024	0.10869
112.784	0.11081	175.002	0.1355	92.1369	0.04857	57.1853	0.01932	118.407	0.03597	263.594	0.10047	268.82	0.09895	269.237	0.07437	196.522	0.09842	208.814	0.10914
112.38	0.1105	174.679	0.13524	90.9707	0.04799	56.8411	0.01921	118.751	0.03609	264.499	0.10086	269.483	0.09924	270.023	0.07458	197.098	0.09879	209.613	0.1096
111.998	0.11017	174.424	0.13502	89.7706	0.04739	56.4914	0.01909	119.094	0.0362	265.21	0.10124	270.309	0.09953	270.83	0.07479	197.675	0.09914	210.637	0.11004
111.565	0.10984	174.151	0.13485	88.6185	0.04673	56.0978	0.01898	119.438	0.03631	266.031	0.10163	270.998	0.09981	271.546	0.07502	198.251	0.09948	211.496	0.11048
111.186	0.10948	173.899	0.1347	87.4521	0.04605	55.7797	0.01886	119.782	0.03643	266.88	0.10202	271.892	0.1001	272.394	0.07528	198.828	0.0998	212.369	0.11088
110.747	0.10912	173.641	0.13457	86.2809	0.04542	55.4069	0.01874	120.126	0.03655	267.66	0.1024	272.659	0.10043	273.252	0.07555	199.404	0.10014	213.244	0.11126
110.363	0.10879	173.326	0.13444	85.0451	0.04466	55.03	0.01859	120.47	0.03664	268.461	0.10278	273.495	0.10077	273.91	0.07582	199.981	0.10046	214.06	0.11167
109.936	0.10847	173.071	0.13429	83.9613	0.04404	54.7058	0.01847	120.814	0.03674	269.096	0.10315	274.276	0.10112	274.804	0.0761	200.557	0.10077	214.897	0.11204
109.571	0.10816	172.762	0.13412	82.7628	0.04343	54.376	0.01835	121.157	0.03684	269.914	0.10351	275.098	0.10148	275.452	0.07638	201.134	0.10107	215.612	0.1124
109.24	0.10784	172.489	0.13392	81.5668	0.04263	54.0488	0.01825	121.501	0.03693	270.812	0.10385	275.727	0.10183	276.219	0.07666	201.71	0.10135	216.419	0.11282
108.865	0.10753	172.225	0.13369	80.3109	0.04181	53.7038	0.01815	121.845	0.03702	271.523	0.10419	276.475	0.10216	276.987	0.07693	202.287	0.10161	217.18	0.11323
108.52	0.10722	171.911	0.13342	79.1548	0.04122	53.3397	0.01804	122.189	0.0371	272.291	0.10451	277.292	0.10248	277.765	0.0772	202.864	0.10188	218.007	0.11364
108.159	0.1069	171.628	0.13313	77.9675	0.0406	52.9791	0.01793	122.533	0.03716	273.124	0.10481	277.969	0.10279	278.393	0.07747	203.44	0.10214	218.84	0.11408
107.818	0.10657	171.335	0.13282	76.7525	0.0399	52.6377	0.01781	122.876	0.03727	273.843	0.10512	278.641	0.10308	279.132	0.07777	204.017	0.10238	219.8	0.1145
107.39	0.10624	171.049	0.1325	75.5214	0.03917	52.2602	0.01771	123.22	0.03738	274.677	0.10542	279.423	0.10338	279.926	0.07807	204.593	0.10263	220.68	0.11489
107.044	0.1059	170.766	0.13219	74.301	0.03844	51.8919	0.01758	123.564	0.03749	275.382	0.10572	280.263	0.10369	280.714	0.07836	205.17	0.10287	221.659	0.11526
106.682	0.10556	170.436	0.13189	73.1436	0.03775	51.4906	0.01743	123.908	0.03758	276.114	0.10601	280.962	0.104	281.491	0.07862	205.746	0.10311	222.528	0.11568
106.302	0.10525	170.167	0.13161	71.9456	0.0372	51.0925	0.01729	124.252	0.0377	276.846	0.10631	281.671	0.10427	282.166	0.07886	206.323	0.10336	223.323	0.11605
105.887	0.10492	169.9	0.13135	70.6998	0.03666	50.7154	0.01716	124.595	0.03783	277.564	0.10662	282.469	0.10453	282.761	0.07908	206.899	0.10361	224.138	0.1164
105.542	0.10458	169.623	0.1311	69.5467	0.03597	50.2868	0.01702	124.939	0.03793	278.388	0.10696	283.149	0.10477	283.466	0.07928	207.476	0.10385	224.95	0.11681
105.149	0.10425	169.317	0.13086	68.3989	0.03533	49.9012	0.01692	125.283	0.03804	278.998	0.10728	283.808	0.10499	284.378	0.07948	208.052	0.10409	225.71	0.11722
104.769	0.10391	169.054	0.13063	67.2691	0.03474	49.504	0.0168	125.627	0.03813	279.767	0.10761	284.477	0.10521	285.051	0.07968	208.629	0.10439	226.528	0.11766
104.397	0.10357	168.776	0.13038	66.1337	0.03412	49.114	0.01671	125.971	0.03822	280.576	0.10791	285.403	0.10541	285.785	0.0799	209.206	0.1047	227.367	0.11813
104.036	0.10323	168.485	0.13013	64.926	0.0335	48.7212	0.0166	126.314	0.03832	281.315	0.10821	286.087	0.10562	286.536	0.08013	209.782	0.105	228.091	0.11855
103.638	0.10289	168.237	0.12987	63.8923	0.03278	48.2937	0.01652	126.658	0.03841	282.072	0.10853	286.7	0.10584	287.284	0.08037	210.359	0.10533	228.996	0.11899
103.211	0.10254	168.042	0.12961	62.7655	0.0321	47.8916	0.01642	127.002	0.0385	282.706	0.10881	287.398	0.10607	287.875	0.08061	210.935	0.10566	229.792	0.11946
102.84	0.1022	167.736	0.12935	61.5869	0.03142	47.4966	0.01632	127.346	0.03859	283.482	0.10905	288.227	0.1063	288.6	0.08084	211.512	0.10599	230.836	0.11992
102.424	0.10185	167.415	0.12911	60.3884	0.03076	47.1071	0.0162	127.69	0.0387	284.206	0.10928	288.812	0.10652	289.249	0.08108	212.088	0.10631	231.751	0.12035
102.034	0.10151	167.188	0.12889	59.1626	0.03021	46.6785	0.01609	128.033	0.03881	284.926	0.10948	289.469	0.10674	289.905	0.08131	212.665	0.10663	232.535	0.12077
101.606	0.10118	166.933	0.12868	57.8804	0.02953	46.2808	0.01594	128.377	0.03893	285.27	0.1097	290.192	0.10695	290.705	0.08156	213.241	0.10692	233.451	0.12122
101.209	0.10082	166.622	0.1285	56.7299	0.02898	45.8399	0.01582	128.721	0.03905	286.334	0.1099	290.797	0.10715	291.532	0.08183	213.818	0.10722	234.258	0.12167
100.862	0.10048	166.34	0.12832	55.4921	0.02842	45.3753	0.01566	129.065	0.03918	287.109	0.11014	291.603	0.10735	292.277	0.0821	214.394	0.10754	235.023	0.12208
100.43	0.10012	166.169	0.12814	54.3162	0.02795	44.958	0.01553	129.409	0.0393	287.514	0.11035	292.279	0.10752	292.831	0.08237	214.971	0.10783	235.788	0.12248
100.017	0.09975	165.859	0.12794	53.1491	0.02741	44.5383	0.0154	129.753	0.0394	288.415	0.11057	293.033	0.10769	293.49	0.08263	215.548	0.1081	236.576	0.12285
99.6258	0.0994	165.664	0.1277	51.8801	0.02687	44.1337	0.01527	130.096	0.0395	288.987	0.1108	293.679	0.10784	294.362	0.08287	216.124	0.10837	237.377	0.12325
99.2965	0.09904	165.329	0.12744	50.5239	0.0264	43.6745	0.01516	130.44	0.03962	289.635	0.11102	294.275	0.10798	294.875	0.08308	216.701	0.10862	238.196	0.12364
98.9497	0.0987	165.064	0.12716	49.1946	0.02589	43.2296	0.01506	130.784	0.03975	290.169	0.11122	295.058	0.10813	295.388	0.08326	217.277	0.10888	239.091	0.12398
98.5504	0.09837	164.865	0.12686	47.8594	0.02546	42.7839	0.01498	131.128	0.03987	291.023	0.11142	295.706	0.10828	296.249	0.08344	217.854	0.10912	239.937	0.12427
98.1904	0.09803	164.573	0.12656	46.6423	0.02499	42.2879	0.0149	131.472	0.03996	291.724	0.11162	296.271	0.10842	296.762	0.08361	218.43	0.10936	240.42	0.12451
97.8375	0.0977	164.343	0.12628	45.4782	0.02459	41.8159	0.01478	131.815	0.04005	292.498	0.11184	297.128	0.10856	297.233	0.08376	219.007	0.10962	240.787	0.12475
97.4485	0.09736	163.996	0.12604	44.5428	0.0242	41.3648	0.01468	132.159	0.04015	293.073	0.11203	297.721	0.10868	298.102	0.08391	219.583	0.10991	241.154	0.12496
97.0882	0.09702	163.744	0.12583	43.6525	0.0238	40.9083	0.01456	132.503	0.04024	293.895	0.11222	298.337	0.10878	299.12	0.08405	220.16	0.11026	241.524	0.12517
96.6873	0.09667	163.524	0.12564	42.4505	0.0234	40.3749	0.01444	132.847	0.04032	294.435	0.11237	298.98	0.10888	299.633	0.08418	220.737	0.11057	241.908	0.12536
96.3156	0.09634	163.26	0.12547	41.298	0.02302	39.8918	0.01432	133.191	0.04038	294.621	0.11253	299.681	0.10898	300.178	0.0843	221.313	0.11088	242.547	0.12557
95.9713	0.09602	162.953	0.1253	40.1406	0.02266	39.4016	0.01419	133.534	0.04046	295.445	0.11268	300.231	0.10906	300.949	0.08441	221.89	0.11117	242.978	0.12581
95.5569	0.09568	162.691	0.12512	38.9277	0.02231	38.8544	0.01406	133.878	0.04055	296.46	0.11281	--	--	--	--	222.466	0.1115	243.395	0.12607
95.1532	0.09537	162.401	0.1249	37.8188	0.02194	38.3757	0.01394	134.222	0.04065	297.035	0.11289	--	--	--	--	223.043	0.11181	243.836	0.12635
94.8097	0.09505	162.117	0.12466	36.6189	0.02153	37.8335	0.01383	134.566	0.04074	297.809	0.11297	--	--	--	--	223.619	0.11207	244.719	0.12665
94.4456	0.09472	161.848	0.12438	35.4512	0.02114	37.3205	0.01367	134.91	0.04083	298.257	0.11307	--	--	--	--	224.196	0.11233	245.612	0.12702
94.0944	0.09439	161.619	0.12408	34.3362	0.02096	36.7536	0.01352	135.253	0.04092	298.875	0.11315	--	--	--	--	224.772	0.11261	246.514	0.12747
93.7295	0.09404	161.324	0.12378	33.1435	0.02065	36.1874	0.01341	135.597	0.04101	299.769	0.11323	--	--	--	--	225.349	0.11291	247.479	0.12796
93.3505	0.09371	161.098	0.12348	32.01	0.02046	35.6317	0.01331	135.941	0.04111	300.224	0.11331	--	--	--	--	225.925	0.11319	248.373	0.12853
92.9868	0.09338	160.819	0.12319	30.8092	0.02031	35.0702	0.01318	136.285	0.04121	300.749	0.11337	--	--	--	--	226.502	0.11342	249.245	0.12908
92.6567	0.09305	160.578	0.12292	29.6651	0.02017	34.4957	0.01307	136.629	0.0413	--	--	--	--	--	--	227.079	0.11368	250.164	0.12967
92.2608	0.09271	160.325	0.12265	28.5033	0.01999	33.8989	0.01299	136.972	0.04137	--	--	--	--	--	--	227.655	0.11392	251.13	0.13027
91.9074	0.09237	160.019	0.12238	27.3195	0.01975	33.2513	0.01289	137.316	0.04145	--	--	--	--	--	--	228.232	0.11421	252.102	0.13079
91.5732	0.09202	159.734	0.1221	26.1582	0.01947	32.6164	0.01279	137.66	0.04152	--	--	--	--	--	--	228.808	0.11451	253.072	0.1313
91.1509	0.09168	159.553	0.12182	24.9881	0.01913	31.989	0.01266	138.004	0.04161	--	--	--	--	--	--	229.385	0.11482	253.901	0.1318
90.7705	0.09134	159.289	0.12152	23.8227	0.0189	31.3404	0.01251	138.348	0.04169	--	--	--	--	--	--	229.961	0.11515	254.788	0.13229
90.3757	0.09097	159.039	0.12121	22.6362	0.01873	30.6341	0.01237	138.692	0.0418	--	--	--	--	--	--	230.538	0.11549	255.685	0.13278
89.98	0.09058	158.769	0.12091	21.4916	0.01854	29.958	0.01225	139.035	0.04192	--	--	--	--	--	--	231.114	0.11581	256.608	0.1333
89.6314	0.09022	158.577	0.12062	20.3718	0.01846	29.1996	0.01216	139.379	0.04205	--	--	--	--	--	--	231.691	0.1161	257.475	0.1338
89.2498	0.08982	158.304	0.12036	18.072	0.01839	28.5044	0.01205	139.723	0.04218	--	--	--	--	--	--	232.267	0.11633	258.243	0.13427
88.8316	0.08944	158.061	0.12014	17.2419	0.01836	27.7146	0.01196	140.067	0.04231	--	--	--	--	--	--	232.844	0.11654	259.107	0.13472
88.4848	0.08906	157.796	0.11997	16.4889	0.01835	26.9409	0.01188	140.411	0.04243	--	--	--	--	--	--	233.421	0.11674	259.948	0.13518
88.0823	0.08868	157.528	0.11984	15.2968	0.01833	26.1117	0.01177	140.754	0.04253	--	--	--	--	--	--	233.997	0.11696	260.667	0.13553
87.6634	0.0883	157.31	0.11974	14.4357	0.01831	25.2752	0.0117	141.098	0.04262	--	--	--	--	--	--	234.574	0.1172	261.635	0.1359
87.303	0.08795	157.058	0.11967	13.2228	0.01831	24.4114	0.01161	141.442	0.0427	--	--	--	--	--	--	235.15	0.11741	262.38	0.13634
86.8977	0.08757	156.821	0.1196	12.0222	0.01831	23.5254	0.01151	141.786	0.0428	--	--	--	--	--	--	235.727	0.11767	263.281	0.13672
86.5347	0.08721	156.549	0.11952	10.8536	0.01831	22.5915	0.0114	142.13	0.04291	--	--	--	--	--	--	236.303	0.11792	264.017	0.13715
86.1189	0.08682	156.328	0.11942	10.0095	0.01832	21.6747	0.01129	142.473	0.04301	--	--	--	--	--	--	236.88	0.11819	264.888	0.13762
85.7081	0.08646	156.064	0.11928	10.0025	0.01832	20.6781	0.0112	142.817	0.04314	--	--	--	--	--	--	237.456	0.11847	265.639	0.13804
85.3582	0.08609	155.901	0.11909	10.0008	0.01833	19.6892	0.01113	143.161	0.04328	--	--	--	--	--	--	238.033	0.11874	266.458	0.13848
84.9469	0.08572	155.581	0.11886	9.9261	0.01834	18.564	0.01104	143.505	0.04344	--	--	--	--	--	--	238.609	0.11905	267.191	0.13894
84.5926	0.08536	155.309	0.11859	9.8283	0.01834	17.5074	0.01097	143.849	0.04356	--	--	--	--	--	--	239.186	0.11936	268.028	0.13939
84.2165	0.08499	155.095	0.11829	9.7415	0.01835	16.5375	0.01091	144.192	0.04366	--	--	--	--	--	--	239.763	0.11966	268.816	0.13982
83.8787	0.08465	154.844	0.11797	9.645	0.01836	15.418	0.01089	144.536	0.04376	--	--	--	--	--	--	240.339	0.11992	269.515	0.14026
83.513	0.0843	154.541	0.11764	9.5545	0.01838	14.3224	0.01083	144.88	0.04385	--	--	--	--	--	--	240.916	0.12016	270.306	0.14072
83.1521	0.08396	154.314	0.11731	9.4613	0.01838	13.2484	0.01079	145.224	0.04394	--	--	--	--	--	--	241.492	0.12042	271.05	0.14114
82.7995	0.08362	154.059	0.11701	9.3671	0.01839	12.2962	0.01075	145.568	0.04403	--	--	--	--	--	--	242.069	0.12065	271.775	0.14158
82.4159	0.08329	153.861	0.11674	9.2703	0.01839	11.3629	0.01069	145.911	0.04413	--	--	--	--	--	--	242.645	0.12092	272.605	0.14201
82.0517	0.08299	153.515	0.1165	9.1753	0.01838	10.6152	0.01064	146.255	0.04425	--	--	--	--	--	--	243.222	0.12118	273.389	0.14248
81.6548	0.08267	153.298	0.11629	9.0627	0.01839	9.68324	0.01061	146.599	0.04437	--	--	--	--	--	--	243.798	0.12146	274.223	0.14298
81.306	0.08232	153.003	0.11613	8.9583	0.0184	8.87049	0.01056	146.943	0.04448	--	--	--	--	--	--	244.375	0.12176	274.864	0.14348
80.8985	0.08201	152.765	0.11599	8.9217	0.0184	8.30698	0.01057	147.287	0.04458	--	--	--	--	--	--	244.951	0.12205	275.599	0.14397
80.5379	0.0817	152.505	0.11587	8.8475	0.01841	7.78139	0.01056	147.631	0.0447	--	--	--	--	--	--	245.528	0.12234	276.306	0.14449
80.1544	0.08137	152.266	0.11575	8.7487	0.01841	7.37502	0.01057	147.974	0.04484	--	--	--	--	--	--	246.105	0.1226	276.988	0.14497
79.7921	0.08105	152.003	0.11563	8.6189	0.01841	6.90903	0.0106	148.318	0.04497	--	--	--	--	--	--	246.681	0.12288	277.84	0.14542
79.4545	0.08074	151.723	0.11549	8.5283	0.0184	6.47015	0.01061	148.662	0.0451	--	--	--	--	--	--	247.258	0.12316	278.695	0.14585
79.0942	0.08042	151.489	0.11532	8.4375	0.0184	6.06377	0.01064	149.006	0.04525	--	--	--	--	--	--	247.834	0.12341	279.358	0.14627
78.7467	0.08012	151.283	0.11513	8.3441	0.01839	5.59779	0.01066	149.35	0.0454	--	--	--	--	--	--	248.411	0.12366	279.869	0.14671
78.3961	0.07981	150.969	0.11491	8.2492	0.0184	5.40814	0.01069	149.693	0.04553	--	--	--	--	--	--	248.987	0.12389	280.452	0.14723
78.0146	0.07947	150.748	0.11466	8.1608	0.01841	4.97467	0.0107	150.037	0.04563	--	--	--	--	--	--	249.564	0.12412	281.12	0.14778
77.648	0.07918	150.442	0.11438	8.0625	0.01841	4.63332	0.01071	150.381	0.04572	--	--	--	--	--	--	250.14	0.12438	282.159	0.14831
77.3008	0.0789	150.167	0.11409	7.9663	0.01841	3.85307	0.01074	150.725	0.04581	--	--	--	--	--	--	250.717	0.12466	282.903	0.14889
76.9535	0.07861	149.906	0.11378	7.8758	0.01841	3.50629	0.01077	151.069	0.04592	--	--	--	--	--	--	251.293	0.12493	283.635	0.14945
76.5819	0.07833	149.691	0.11347	7.7825	0.01839	3.32207	0.0108	151.412	0.04604	--	--	--	--	--	--	251.87	0.12523	284.344	0.15002
76.1967	0.07806	149.459	0.11316	7.6908	0.01841	2.85609	0.01083	151.756	0.04616	--	--	--	--	--	--	252.447	0.12554	284.963	0.15057
75.8221	0.07775	149.241	0.11286	7.5989	0.01841	2.50931	0.01085	152.1	0.04628	--	--	--	--	--	--	253.023	0.12584	285.573	0.15108
75.4213	0.07745	148.979	0.11258	7.5064	0.01843	2.3576	0.01087	152.444	0.04641	--	--	--	--	--	--	253.6	0.12616	286.29	0.15157
75.0542	0.07715	148.76	0.11232	7.4131	0.01844	2.13544	0.01088	152.788	0.04655	--	--	--	--	--	--	254.176	0.12647	286.859	0.15208
74.7118	0.07686	148.529	0.1121	7.3227	0.01848	1.9686	0.0109	153.131	0.04667	--	--	--	--	--	--	254.753	0.12681	287.782	0.15266
74.3204	0.07657	148.292	0.11192	7.2291	0.0185	1.70668	0.0109	153.475	0.04678	--	--	--	--	--	--	255.329	0.12715	288.459	0.1532
74.0045	0.07628	148.107	0.11176	7.1404	0.0185	--	--	153.819	0.04688	--	--	--	--	--	--	255.906	0.1275	289.226	0.15373
73.642	0.076	147.76	0.11165	7.0427	0.01849	--	--	154.163	0.04699	--	--	--	--	--	--	256.482	0.12785	289.985	0.15424
73.2967	0.07573	147.631	0.11155	6.9432	0.01848	--	--	154.507	0.04711	--	--	--	--	--	--	257.059	0.12817	290.653	0.15473
72.919	0.07545	147.333	0.11147	6.8508	0.01847	--	--	154.85	0.04724	--	--	--	--	--	--	257.635	0.1285	291.222	0.15521
72.5544	0.07517	147.107	0.11138	6.7615	0.01849	--	--	155.194	0.04736	--	--	--	--	--	--	258.212	0.12879	291.979	0.15565
72.1778	0.07489	146.829	0.11127	6.6639	0.01849	--	--	155.538	0.04748	--	--	--	--	--	--	258.789	0.12908	292.599	0.15605
71.811	0.0746	146.617	0.11113	6.5757	0.01849	--	--	155.882	0.04761	--	--	--	--	--	--	259.365	0.12938	293.168	0.15642
71.4315	0.07434	146.425	0.11095	6.4821	0.0185	--	--	156.226	0.04773	--	--	--	--	--	--	259.942	0.12965	293.828	0.15685
71.062	0.07406	146.173	0.11071	6.3919	0.01852	--	--	156.57	0.04786	--	--	--	--	--	--	260.518	0.12996	294.595	0.15729
70.6495	0.07378	145.861	0.11043	6.2966	0.01853	--	--	156.913	0.04798	--	--	--	--	--	--	261.095	0.13026	295.353	0.1577
70.2359	0.07351	145.621	0.11011	6.2038	0.01854	--	--	157.257	0.04809	--	--	--	--	--	--	261.671	0.13056	295.823	0.15811
69.8831	0.07326	145.42	0.10976	6.1079	0.01853	--	--	157.601	0.04818	--	--	--	--	--	--	262.248	0.13089	296.343	0.15851
69.4887	0.07298	145.143	0.10941	6.0128	0.01855	--	--	157.945	0.04829	--	--	--	--	--	--	262.824	0.13122	296.821	0.15891
69.1583	0.07272	144.933	0.10908	5.9233	0.01856	--	--	158.289	0.04842	--	--	--	--	--	--	263.401	0.13155	297.58	0.15924
68.7778	0.07245	144.695	0.10878	5.8307	0.01856	--	--	158.632	0.04856	--	--	--	--	--	--	263.977	0.13186	298.248	0.1595
68.4135	0.0722	144.383	0.10852	5.7368	0.01857	--	--	158.976	0.04869	--	--	--	--	--	--	264.554	0.13218	298.668	0.15972
68.0023	0.07193	144.022	0.1083	5.6473	0.01858	--	--	159.32	0.04883	--	--	--	--	--	--	265.131	0.1325	299.237	0.1599
67.6599	0.07169	143.909	0.10812	5.5537	0.0186	--	--	159.664	0.04897	--	--	--	--	--	--	265.707	0.13284	299.576	0.16004
67.2665	0.07143	143.69	0.10797	5.4565	0.01862	--	--	160.008	0.04911	--	--	--	--	--	--	266.284	0.13319	300.046	0.16013
66.9014	0.07118	143.407	0.10783	5.3631	0.01863	--	--	160.351	0.04923	--	--	--	--	--	--	266.86	0.13351	300.375	0.16017
66.4996	0.07098	143.145	0.1077	5.2704	0.01864	--	--	160.695	0.04935	--	--	--	--	--	--	267.437	0.13382	--	--
66.081	0.07074	142.937	0.10757	5.1768	0.01864	--	--	161.039	0.04947	--	--	--	--	--	--	268.013	0.13417	--	--
65.698	0.0705	142.554	0.10744	5.086	0.01866	--	--	161.383	0.04961	--	--	--	--	--	--	268.59	0.13446	--	--
65.2653	0.07026	142.376	0.10731	4.9885	0.01866	--	--	161.727	0.04975	--	--	--	--	--	--	269.166	0.13474	--	--
64.8808	0.07002	142.137	0.10717	4.8943	0.01867	--	--	162.07	0.04988	--	--	--	--	--	--	269.743	0.13501	--	--
64.4828	0.06977	141.933	0.10704	4.7997	0.01869	--	--	162.414	0.05	--	--	--	--	--	--	270.32	0.13525	--	--
64.1402	0.06952	141.669	0.1069	4.7101	0.0187	--	--	162.758	0.0501	--	--	--	--	--	--	270.896	0.13547	--	--
63.7525	0.06929	141.392	0.10675	4.6211	0.01871	--	--	163.102	0.05019	--	--	--	--	--	--	271.473	0.13574	--	--
63.345	0.06904	141.153	0.10659	4.5265	0.01872	--	--	163.446	0.05029	--	--	--	--	--	--	272.049	0.13602	--	--
62.9455	0.06879	140.886	0.1064	4.4322	0.01873	--	--	163.789	0.05041	--	--	--	--	--	--	272.626	0.13627	--	--
62.5567	0.06851	140.612	0.10618	4.3412	0.01874	--	--	164.133	0.05055	--	--	--	--	--	--	273.202	0.13655	--	--
62.1592	0.06825	140.377	0.10595	4.25	0.01874	--	--	164.477	0.05068	--	--	--	--	--	--	273.779	0.13685	--	--
61.7326	0.06799	140.083	0.1057	4.1573	0.01875	--	--	164.821	0.05081	--	--	--	--	--	--	274.355	0.13707	--	--
61.3054	0.06773	139.818	0.10545	4.0695	0.01876	--	--	165.165	0.05097	--	--	--	--	--	--	274.932	0.13734	--	--
60.8843	0.06746	139.66	0.10522	3.9778	0.01877	--	--	165.508	0.05114	--	--	--	--	--	--	275.508	0.13759	--	--
60.4211	0.06719	139.43	0.10502	3.8873	0.01879	--	--	165.852	0.0513	--	--	--	--	--	--	276.085	0.13784	--	--
59.9914	0.06693	139.179	0.10485	3.79	0.01879	--	--	166.196	0.05143	--	--	--	--	--	--	276.662	0.1381	--	--
59.6277	0.06667	138.986	0.10472	3.6977	0.0188	--	--	166.54	0.05155	--	--	--	--	--	--	277.238	0.13841	--	--
59.2377	0.06641	138.784	0.10461	3.6073	0.01882	--	--	166.884	0.05167	--	--	--	--	--	--	277.815	0.13871	--	--
58.8102	0.06615	138.511	0.10452	3.5111	0.01883	--	--	167.228	0.05179	--	--	--	--	--	--	278.391	0.13901	--	--
58.41	0.06589	138.304	0.10442	3.4249	0.01884	--	--	167.571	0.0519	--	--	--	--	--	--	278.968	0.13933	--	--
57.9966	0.06561	138.075	0.10431	3.30756	0.01885	--	--	167.915	0.05199	--	--	--	--	--	--	279.544	0.13966	--	--
57.5564	0.06535	137.822	0.10417	3.2314	0.01887	--	--	168.259	0.05212	--	--	--	--	--	--	280.121	0.13995	--	--
57.1166	0.06511	137.604	0.104	3.13473	0.01889	--	--	168.603	0.05227	--	--	--	--	--	--	280.697	0.14031	--	--
56.6657	0.06486	137.363	0.1038	3.01606	0.01891	--	--	168.947	0.05244	--	--	--	--	--	--	281.274	0.1407	--	--
56.2251	0.06462	137.123	0.10358	2.9614	0.01893	--	--	169.29	0.05261	--	--	--	--	--	--	281.85	0.14107	--	--
55.7631	0.06433	136.901	0.10333	2.8625	0.01895	--	--	169.634	0.05276	--	--	--	--	--	--	282.427	0.14139	--	--
55.2711	0.06411	136.704	0.10307	2.76395	0.01897	--	--	169.978	0.05289	--	--	--	--	--	--	283.004	0.1417	--	--
54.8379	0.06387	136.437	0.10281	2.6533	0.01899	--	--	170.322	0.053	--	--	--	--	--	--	283.58	0.14202	--	--
54.4331	0.06366	136.193	0.10256	2.59358	0.01901	--	--	170.666	0.0531	--	--	--	--	--	--	284.157	0.1423	--	--
53.9924	0.06345	135.965	0.10232	2.52267	0.01903	--	--	171.009	0.05321	--	--	--	--	--	--	284.733	0.14256	--	--
53.5443	0.06324	135.763	0.1021	2.44635	0.01904	--	--	171.353	0.05334	--	--	--	--	--	--	285.31	0.14285	--	--
53.0934	0.06301	135.514	0.10189	2.37003	0.01906	--	--	171.697	0.05348	--	--	--	--	--	--	285.886	0.1431	--	--
52.7124	0.0628	135.251	0.1017	2.31045	0.01907	--	--	172.041	0.05359	--	--	--	--	--	--	286.463	0.14342	--	--
52.1558	0.06258	135.044	0.10151	2.22822	0.01909	--	--	172.385	0.05371	--	--	--	--	--	--	287.039	0.14377	--	--
51.6536	0.06237	134.806	0.10132	2.15731	0.0191	--	--	172.728	0.05382	--	--	--	--	--	--	287.616	0.14409	--	--
51.1565	0.06214	134.529	0.10113	2.08099	0.01911	--	--	173.072	0.05396	--	--	--	--	--	--	288.192	0.14438	--	--
50.6907	0.06192	134.325	0.10094	2.00713	0.01913	--	--	173.416	0.0541	--	--	--	--	--	--	288.769	0.14471	--	--
50.137	0.06167	134.091	0.10074	--	--	--	--	173.76	0.05424	--	--	--	--	--	--	289.346	0.14512	--	--
49.6462	0.06142	133.832	0.10054	--	--	--	--	174.104	0.05436	--	--	--	--	--	--	289.922	0.1455	--	--
49.1619	0.06117	133.626	0.10035	--	--	--	--	174.447	0.0545	--	--	--	--	--	--	290.499	0.14588	--	--
48.65	0.06092	133.374	0.10016	--	--	--	--	174.791	0.05463	--	--	--	--	--	--	291.075	0.14622	--	--
48.1328	0.06066	133.148	0.09999	--	--	--	--	175.135	0.05476	--	--	--	--	--	--	291.652	0.14659	--	--
47.6373	0.06042	132.858	0.09983	--	--	--	--	175.479	0.05486	--	--	--	--	--	--	292.228	0.14697	--	--
47.1413	0.06017	132.637	0.09968	--	--	--	--	175.823	0.05498	--	--	--	--	--	--	292.805	0.14734	--	--
46.6301	0.05993	132.425	0.09954	--	--	--	--	176.167	0.05509	--	--	--	--	--	--	293.381	0.14767	--	--
46.058	0.05968	132.171	0.09941	--	--	--	--	176.51	0.05524	--	--	--	--	--	--	293.958	0.14796	--	--
45.5194	0.05944	131.935	0.09928	--	--	--	--	176.854	0.0554	--	--	--	--	--	--	294.534	0.14828	--	--
44.9525	0.05917	131.598	0.09915	--	--	--	--	177.198	0.05554	--	--	--	--	--	--	295.111	0.14864	--	--
44.4285	0.05891	131.423	0.09902	--	--	--	--	177.542	0.05567	--	--	--	--	--	--	295.688	0.14896	--	--
43.8378	0.05864	131.192	0.09887	--	--	--	--	177.886	0.0558	--	--	--	--	--	--	296.264	0.14931	--	--
43.2746	0.05838	130.863	0.0987	--	--	--	--	178.229	0.05593	--	--	--	--	--	--	296.841	0.14961	--	--
42.6909	0.05812	130.695	0.0985	--	--	--	--	178.573	0.05606	--	--	--	--	--	--	297.417	0.14995	--	--
42.0322	0.05786	130.433	0.09829	--	--	--	--	178.917	0.0562	--	--	--	--	--	--	297.994	0.1503	--	--
41.4732	0.05759	130.166	0.09807	--	--	--	--	179.261	0.05634	--	--	--	--	--	--	298.57	0.15061	--	--
40.8821	0.05731	129.977	0.09785	--	--	--	--	179.605	0.0565	--	--	--	--	--	--	299.147	0.15089	--	--
40.2708	0.05702	129.709	0.09764	--	--	--	--	179.948	0.05667	--	--	--	--	--	--	299.723	0.15114	--	--
39.5625	0.05679	129.52	0.09747	--	--	--	--	180.292	0.05683	--	--	--	--	--	--	300.3	0.15138	--	--
38.8929	0.05652	129.251	0.09733	--	--	--	--	180.636	0.05697	--	--	--	--	--	--	300.837	0.15159	--	--
38.2358	0.05626	129.092	0.09723	--	--	--	--	180.98	0.0571	--	--	--	--	--	--	301.379	0.15178	--	--
37.5118	0.056	128.85	0.09716	--	--	--	--	181.324	0.05724	--	--	--	--	--	--	--	--	--	--
36.6819	0.05574	128.653	0.0971	--	--	--	--	181.667	0.05736	--	--	--	--	--	--	--	--	--	--
35.7815	0.05547	128.432	0.09705	--	--	--	--	182.011	0.05748	--	--	--	--	--	--	--	--	--	--
34.9043	0.05521	128.203	0.09699	--	--	--	--	182.355	0.05762	--	--	--	--	--	--	--	--	--	--
33.9758	0.05494	127.994	0.09692	--	--	--	--	182.699	0.05777	--	--	--	--	--	--	--	--	--	--
32.9503	0.05466	127.731	0.09681	--	--	--	--	183.043	0.05792	--	--	--	--	--	--	--	--	--	--
31.9854	0.05436	127.468	0.09668	--	--	--	--	183.386	0.05807	--	--	--	--	--	--	--	--	--	--
30.9396	0.05405	127.296	0.09652	--	--	--	--	183.73	0.05822	--	--	--	--	--	--	--	--	--	--
29.9142	0.05373	127.019	0.09632	--	--	--	--	184.074	0.05836	--	--	--	--	--	--	--	--	--	--
28.8076	0.05342	126.848	0.09609	--	--	--	--	184.418	0.05851	--	--	--	--	--	--	--	--	--	--
27.6594	0.05311	126.593	0.09585	--	--	--	--	184.762	0.05867	--	--	--	--	--	--	--	--	--	--
26.4829	0.05282	126.388	0.09559	--	--	--	--	185.106	0.05882	--	--	--	--	--	--	--	--	--	--
25.2053	0.05253	126.106	0.09534	--	--	--	--	185.449	0.05897	--	--	--	--	--	--	--	--	--	--
23.8013	0.05227	125.883	0.09509	--	--	--	--	185.793	0.05911	--	--	--	--	--	--	--	--	--	--
22.2649	0.052	125.655	0.09485	--	--	--	--	186.137	0.05926	--	--	--	--	--	--	--	--	--	--
20.5609	0.05175	125.44	0.09463	--	--	--	--	186.481	0.05939	--	--	--	--	--	--	--	--	--	--
18.6539	0.05151	125.178	0.09443	--	--	--	--	186.825	0.05953	--	--	--	--	--	--	--	--	--	--
16.5095	0.05129	124.928	0.09425	--	--	--	--	187.168	0.05967	--	--	--	--	--	--	--	--	--	--
14.0854	0.05111	124.708	0.09407	--	--	--	--	187.512	0.05983	--	--	--	--	--	--	--	--	--	--
11.4836	0.05094	124.448	0.09389	--	--	--	--	187.856	0.05996	--	--	--	--	--	--	--	--	--	--
9.2325	0.05079	124.193	0.0937	--	--	--	--	188.2	0.06008	--	--	--	--	--	--	--	--	--	--
8.14336	0.05065	123.969	0.09351	--	--	--	--	188.544	0.0602	--	--	--	--	--	--	--	--	--	--
7.13124	0.05053	123.75	0.0933	--	--	--	--	188.887	0.06031	--	--	--	--	--	--	--	--	--	--
6.05166	0.05042	123.465	0.09309	--	--	--	--	189.231	0.06043	--	--	--	--	--	--	--	--	--	--
5.37209	0.05033	123.279	0.09289	--	--	--	--	189.575	0.06056	--	--	--	--	--	--	--	--	--	--
4.7335	0.05025	123.012	0.0927	--	--	--	--	189.919	0.0607	--	--	--	--	--	--	--	--	--	--
4.16479	0.05018	122.793	0.09253	--	--	--	--	190.263	0.06083	--	--	--	--	--	--	--	--	--	--
3.5819	0.05013	122.596	0.09239	--	--	--	--	190.606	0.06098	--	--	--	--	--	--	--	--	--	--
3.20229	0.0501	122.331	0.09229	--	--	--	--	190.95	0.06115	--	--	--	--	--	--	--	--	--	--
2.79895	0.05008	122.075	0.09222	--	--	--	--	191.294	0.06133	--	--	--	--	--	--	--	--	--	--
2.43068	0.05007	121.831	0.09217	--	--	--	--	191.638	0.06152	--	--	--	--	--	--	--	--	--	--
1.92006	0.05008	121.564	0.09188	--	--	--	--	191.982	0.0617	--	--	--	--	--	--	--	--	--	--
1.5863	0.05011	121.342	0.09186	--	--	--	--	192.325	0.06188	--	--	--	--	--	--	--	--	--	--
--	--	121.089	0.09183	--	--	--	--	192.669	0.06203	--	--	--	--	--	--	--	--	--	--
--	--	120.813	0.09151	--	--	--	--	193.013	0.0622	--	--	--	--	--	--	--	--	--	--
--	--	120.575	0.09141	--	--	--	--	193.357	0.06236	--	--	--	--	--	--	--	--	--	--
--	--	120.397	0.09129	--	--	--	--	193.701	0.06252	--	--	--	--	--	--	--	--	--	--
--	--	120.15	0.09139	--	--	--	--	194.044	0.06267	--	--	--	--	--	--	--	--	--	--
--	--	119.899	0.09119	--	--	--	--	194.388	0.06282	--	--	--	--	--	--	--	--	--	--
--	--	119.719	0.09121	--	--	--	--	194.732	0.06298	--	--	--	--	--	--	--	--	--	--
--	--	119.519	0.09095	--	--	--	--	195.076	0.06312	--	--	--	--	--	--	--	--	--	--
--	--	119.295	0.09066	--	--	--	--	195.42	0.06326	--	--	--	--	--	--	--	--	--	--
--	--	119.082	0.09037	--	--	--	--	195.764	0.06337	--	--	--	--	--	--	--	--	--	--
--	--	118.849	0.0901	--	--	--	--	196.107	0.06348	--	--	--	--	--	--	--	--	--	--
--	--	118.656	0.08985	--	--	--	--	196.451	0.06359	--	--	--	--	--	--	--	--	--	--
--	--	118.453	0.08965	--	--	--	--	196.795	0.06372	--	--	--	--	--	--	--	--	--	--
--	--	118.215	0.08949	--	--	--	--	197.139	0.06385	--	--	--	--	--	--	--	--	--	--
--	--	117.991	0.08937	--	--	--	--	197.483	0.06397	--	--	--	--	--	--	--	--	--	--
--	--	117.792	0.0893	--	--	--	--	197.826	0.0641	--	--	--	--	--	--	--	--	--	--
--	--	117.611	0.08924	--	--	--	--	198.17	0.06425	--	--	--	--	--	--	--	--	--	--
--	--	117.413	0.0892	--	--	--	--	198.514	0.06441	--	--	--	--	--	--	--	--	--	--
--	--	117.188	0.08914	--	--	--	--	198.858	0.06459	--	--	--	--	--	--	--	--	--	--
--	--	116.932	0.08905	--	--	--	--	199.202	0.06476	--	--	--	--	--	--	--	--	--	--
--	--	116.741	0.08894	--	--	--	--	199.545	0.06492	--	--	--	--	--	--	--	--	--	--
--	--	116.548	0.08881	--	--	--	--	199.889	0.06508	--	--	--	--	--	--	--	--	--	--
--	--	116.323	0.08866	--	--	--	--	200.233	0.06522	--	--	--	--	--	--	--	--	--	--
--	--	116.12	0.0885	--	--	--	--	200.577	0.06535	--	--	--	--	--	--	--	--	--	--
--	--	115.881	0.08834	--	--	--	--	200.921	0.06548	--	--	--	--	--	--	--	--	--	--
--	--	115.678	0.0882	--	--	--	--	201.264	0.06562	--	--	--	--	--	--	--	--	--	--
--	--	115.45	0.08806	--	--	--	--	201.608	0.06575	--	--	--	--	--	--	--	--	--	--
--	--	115.258	0.08794	--	--	--	--	201.952	0.06588	--	--	--	--	--	--	--	--	--	--
--	--	115.044	0.08782	--	--	--	--	202.296	0.066	--	--	--	--	--	--	--	--	--	--
--	--	114.801	0.08769	--	--	--	--	202.64	0.06612	--	--	--	--	--	--	--	--	--	--
--	--	114.529	0.08754	--	--	--	--	202.983	0.06624	--	--	--	--	--	--	--	--	--	--
--	--	114.405	0.08738	--	--	--	--	203.327	0.06636	--	--	--	--	--	--	--	--	--	--
--	--	114.125	0.08719	--	--	--	--	203.671	0.06648	--	--	--	--	--	--	--	--	--	--
--	--	113.931	0.08699	--	--	--	--	204.015	0.06661	--	--	--	--	--	--	--	--	--	--
--	--	113.666	0.08678	--	--	--	--	204.359	0.06676	--	--	--	--	--	--	--	--	--	--
--	--	113.448	0.08657	--	--	--	--	204.703	0.06692	--	--	--	--	--	--	--	--	--	--
--	--	113.262	0.08638	--	--	--	--	205.046	0.06706	--	--	--	--	--	--	--	--	--	--
--	--	113.043	0.08622	--	--	--	--	205.39	0.0672	--	--	--	--	--	--	--	--	--	--
--	--	112.806	0.08607	--	--	--	--	205.734	0.06736	--	--	--	--	--	--	--	--	--	--
--	--	112.582	0.08594	--	--	--	--	206.078	0.06753	--	--	--	--	--	--	--	--	--	--
--	--	112.398	0.08583	--	--	--	--	206.422	0.06769	--	--	--	--	--	--	--	--	--	--
--	--	112.179	0.08572	--	--	--	--	206.765	0.06785	--	--	--	--	--	--	--	--	--	--
--	--	111.945	0.0856	--	--	--	--	207.109	0.068	--	--	--	--	--	--	--	--	--	--
--	--	111.703	0.08546	--	--	--	--	207.453	0.06818	--	--	--	--	--	--	--	--	--	--
--	--	111.486	0.08531	--	--	--	--	207.797	0.06835	--	--	--	--	--	--	--	--	--	--
--	--	111.224	0.08514	--	--	--	--	208.141	0.06849	--	--	--	--	--	--	--	--	--	--
--	--	110.973	0.08497	--	--	--	--	208.484	0.06862	--	--	--	--	--	--	--	--	--	--
--	--	110.743	0.08478	--	--	--	--	208.828	0.06875	--	--	--	--	--	--	--	--	--	--
--	--	110.519	0.08459	--	--	--	--	209.172	0.0689	--	--	--	--	--	--	--	--	--	--
--	--	110.273	0.0844	--	--	--	--	209.516	0.06905	--	--	--	--	--	--	--	--	--	--
--	--	110.083	0.08421	--	--	--	--	209.86	0.06921	--	--	--	--	--	--	--	--	--	--
--	--	109.833	0.08402	--	--	--	--	210.203	0.06937	--	--	--	--	--	--	--	--	--	--
--	--	109.655	0.0841	--	--	--	--	210.547	0.06953	--	--	--	--	--	--	--	--	--	--
--	--	109.44	0.08395	--	--	--	--	210.891	0.0697	--	--	--	--	--	--	--	--	--	--
--	--	109.299	0.08381	--	--	--	--	211.235	0.06985	--	--	--	--	--	--	--	--	--	--
--	--	109.06	0.08373	--	--	--	--	211.579	0.06998	--	--	--	--	--	--	--	--	--	--
--	--	108.835	0.08342	--	--	--	--	211.922	0.0701	--	--	--	--	--	--	--	--	--	--
--	--	108.649	0.08341	--	--	--	--	212.266	0.07021	--	--	--	--	--	--	--	--	--	--
--	--	108.444	0.08343	--	--	--	--	212.61	0.07034	--	--	--	--	--	--	--	--	--	--
--	--	108.239	0.08346	--	--	--	--	212.954	0.07049	--	--	--	--	--	--	--	--	--	--
--	--	108.035	0.08322	--	--	--	--	213.298	0.07066	--	--	--	--	--	--	--	--	--	--
--	--	107.811	0.08318	--	--	--	--	213.642	0.07082	--	--	--	--	--	--	--	--	--	--
--	--	107.626	0.08286	--	--	--	--	213.985	0.07097	--	--	--	--	--	--	--	--	--	--
--	--	107.392	0.08272	--	--	--	--	214.329	0.07111	--	--	--	--	--	--	--	--	--	--
--	--	107.182	0.08256	--	--	--	--	214.673	0.07126	--	--	--	--	--	--	--	--	--	--
--	--	106.996	0.08239	--	--	--	--	215.017	0.07141	--	--	--	--	--	--	--	--	--	--
--	--	106.773	0.08243	--	--	--	--	215.361	0.07155	--	--	--	--	--	--	--	--	--	--
--	--	106.551	0.08221	--	--	--	--	215.704	0.07169	--	--	--	--	--	--	--	--	--	--
--	--	106.31	0.08197	--	--	--	--	216.048	0.07185	--	--	--	--	--	--	--	--	--	--
--	--	106.121	0.08201	--	--	--	--	216.392	0.07201	--	--	--	--	--	--	--	--	--	--
--	--	105.927	0.08178	--	--	--	--	216.736	0.07216	--	--	--	--	--	--	--	--	--	--
--	--	105.7	0.08154	--	--	--	--	217.08	0.0723	--	--	--	--	--	--	--	--	--	--
--	--	105.485	0.08129	--	--	--	--	217.423	0.07243	--	--	--	--	--	--	--	--	--	--
--	--	105.281	0.08103	--	--	--	--	217.767	0.07256	--	--	--	--	--	--	--	--	--	--
--	--	105.083	0.08078	--	--	--	--	218.111	0.07269	--	--	--	--	--	--	--	--	--	--
--	--	104.882	0.08054	--	--	--	--	218.455	0.0728	--	--	--	--	--	--	--	--	--	--
--	--	104.603	0.08033	--	--	--	--	218.799	0.07291	--	--	--	--	--	--	--	--	--	--
--	--	104.414	0.08014	--	--	--	--	219.142	0.07302	--	--	--	--	--	--	--	--	--	--
--	--	104.197	0.07999	--	--	--	--	219.486	0.07314	--	--	--	--	--	--	--	--	--	--
--	--	103.951	0.07987	--	--	--	--	219.83	0.07328	--	--	--	--	--	--	--	--	--	--
--	--	103.772	0.07978	--	--	--	--	220.174	0.07343	--	--	--	--	--	--	--	--	--	--
--	--	103.537	0.07971	--	--	--	--	220.518	0.07358	--	--	--	--	--	--	--	--	--	--
--	--	103.285	0.07963	--	--	--	--	220.861	0.07374	--	--	--	--	--	--	--	--	--	--
--	--	103.096	0.07955	--	--	--	--	221.205	0.0739	--	--	--	--	--	--	--	--	--	--
--	--	102.848	0.07943	--	--	--	--	221.549	0.07404	--	--	--	--	--	--	--	--	--	--
--	--	102.639	0.0793	--	--	--	--	221.893	0.07415	--	--	--	--	--	--	--	--	--	--
--	--	102.439	0.07914	--	--	--	--	222.237	0.0743	--	--	--	--	--	--	--	--	--	--
--	--	102.194	0.07896	--	--	--	--	222.581	0.07445	--	--	--	--	--	--	--	--	--	--
--	--	102.014	0.07878	--	--	--	--	222.924	0.07461	--	--	--	--	--	--	--	--	--	--
--	--	101.757	0.0786	--	--	--	--	223.268	0.07476	--	--	--	--	--	--	--	--	--	--
--	--	101.494	0.07843	--	--	--	--	223.612	0.07492	--	--	--	--	--	--	--	--	--	--
--	--	101.26	0.07829	--	--	--	--	223.956	0.07507	--	--	--	--	--	--	--	--	--	--
--	--	101.023	0.07816	--	--	--	--	224.3	0.07524	--	--	--	--	--	--	--	--	--	--
--	--	100.799	0.07806	--	--	--	--	224.643	0.07541	--	--	--	--	--	--	--	--	--	--
--	--	100.571	0.07796	--	--	--	--	224.987	0.07555	--	--	--	--	--	--	--	--	--	--
--	--	100.356	0.07788	--	--	--	--	225.331	0.0757	--	--	--	--	--	--	--	--	--	--
--	--	100.127	0.0778	--	--	--	--	225.675	0.07587	--	--	--	--	--	--	--	--	--	--
--	--	99.9203	0.07772	--	--	--	--	226.019	0.07602	--	--	--	--	--	--	--	--	--	--
--	--	99.7002	0.07764	--	--	--	--	226.362	0.07616	--	--	--	--	--	--	--	--	--	--
--	--	99.4992	0.07756	--	--	--	--	226.706	0.07628	--	--	--	--	--	--	--	--	--	--
--	--	99.2871	0.07747	--	--	--	--	227.05	0.07641	--	--	--	--	--	--	--	--	--	--
--	--	99.0651	0.07738	--	--	--	--	227.394	0.07657	--	--	--	--	--	--	--	--	--	--
--	--	98.8914	0.07728	--	--	--	--	227.738	0.07675	--	--	--	--	--	--	--	--	--	--
--	--	98.6568	0.07717	--	--	--	--	228.081	0.07694	--	--	--	--	--	--	--	--	--	--
--	--	98.4796	0.07706	--	--	--	--	228.425	0.07711	--	--	--	--	--	--	--	--	--	--
--	--	98.2591	0.07694	--	--	--	--	228.769	0.07728	--	--	--	--	--	--	--	--	--	--
--	--	97.9977	0.07681	--	--	--	--	229.113	0.07746	--	--	--	--	--	--	--	--	--	--
--	--	97.8285	0.07666	--	--	--	--	229.457	0.07762	--	--	--	--	--	--	--	--	--	--
--	--	97.6157	0.0765	--	--	--	--	229.8	0.07777	--	--	--	--	--	--	--	--	--	--
--	--	97.3971	0.07633	--	--	--	--	230.144	0.0779	--	--	--	--	--	--	--	--	--	--
--	--	97.1952	0.07615	--	--	--	--	230.488	0.07804	--	--	--	--	--	--	--	--	--	--
--	--	96.9979	0.07595	--	--	--	--	230.832	0.07818	--	--	--	--	--	--	--	--	--	--
--	--	96.7946	0.07574	--	--	--	--	231.176	0.07835	--	--	--	--	--	--	--	--	--	--
--	--	96.5543	0.07552	--	--	--	--	231.519	0.07852	--	--	--	--	--	--	--	--	--	--
--	--	96.3274	0.0753	--	--	--	--	231.863	0.07869	--	--	--	--	--	--	--	--	--	--
--	--	96.0966	0.07509	--	--	--	--	232.207	0.07885	--	--	--	--	--	--	--	--	--	--
--	--	95.8773	0.07489	--	--	--	--	232.551	0.07901	--	--	--	--	--	--	--	--	--	--
--	--	95.6576	0.07471	--	--	--	--	232.895	0.07915	--	--	--	--	--	--	--	--	--	--
--	--	95.4571	0.07455	--	--	--	--	233.239	0.0793	--	--	--	--	--	--	--	--	--	--
--	--	95.2248	0.07442	--	--	--	--	233.582	0.07944	--	--	--	--	--	--	--	--	--	--
--	--	95.0171	0.0743	--	--	--	--	233.926	0.0796	--	--	--	--	--	--	--	--	--	--
--	--	94.7821	0.07419	--	--	--	--	234.27	0.07976	--	--	--	--	--	--	--	--	--	--
--	--	94.5925	0.07408	--	--	--	--	234.614	0.07996	--	--	--	--	--	--	--	--	--	--
--	--	94.4146	0.07396	--	--	--	--	234.958	0.08015	--	--	--	--	--	--	--	--	--	--
--	--	94.2266	0.07383	--	--	--	--	235.301	0.08034	--	--	--	--	--	--	--	--	--	--
--	--	94.0084	0.07369	--	--	--	--	235.645	0.08051	--	--	--	--	--	--	--	--	--	--
--	--	93.8001	0.07353	--	--	--	--	235.989	0.08069	--	--	--	--	--	--	--	--	--	--
--	--	93.5753	0.07335	--	--	--	--	236.333	0.08086	--	--	--	--	--	--	--	--	--	--
--	--	93.3965	0.07317	--	--	--	--	236.677	0.08104	--	--	--	--	--	--	--	--	--	--
--	--	93.1362	0.07299	--	--	--	--	237.02	0.08121	--	--	--	--	--	--	--	--	--	--
--	--	92.9865	0.07281	--	--	--	--	237.364	0.08138	--	--	--	--	--	--	--	--	--	--
--	--	92.7484	0.07263	--	--	--	--	237.708	0.08156	--	--	--	--	--	--	--	--	--	--
--	--	92.5311	0.07246	--	--	--	--	238.052	0.08174	--	--	--	--	--	--	--	--	--	--
--	--	92.3244	0.07229	--	--	--	--	238.396	0.0819	--	--	--	--	--	--	--	--	--	--
--	--	92.1324	0.07212	--	--	--	--	238.739	0.08206	--	--	--	--	--	--	--	--	--	--
--	--	91.9057	0.07195	--	--	--	--	239.083	0.08222	--	--	--	--	--	--	--	--	--	--
--	--	91.6891	0.07177	--	--	--	--	239.427	0.08236	--	--	--	--	--	--	--	--	--	--
--	--	91.4872	0.0716	--	--	--	--	239.771	0.08249	--	--	--	--	--	--	--	--	--	--
--	--	91.2783	0.07143	--	--	--	--	240.115	0.08263	--	--	--	--	--	--	--	--	--	--
--	--	91.0397	0.07127	--	--	--	--	240.458	0.08278	--	--	--	--	--	--	--	--	--	--
--	--	90.8028	0.07113	--	--	--	--	240.802	0.08295	--	--	--	--	--	--	--	--	--	--
--	--	90.6054	0.07101	--	--	--	--	241.146	0.08315	--	--	--	--	--	--	--	--	--	--
--	--	90.4292	0.0709	--	--	--	--	241.49	0.08338	--	--	--	--	--	--	--	--	--	--
--	--	90.1633	0.0708	--	--	--	--	241.834	0.08359	--	--	--	--	--	--	--	--	--	--
--	--	89.9068	0.07071	--	--	--	--	242.178	0.08378	--	--	--	--	--	--	--	--	--	--
--	--	89.7672	0.07061	--	--	--	--	242.521	0.08397	--	--	--	--	--	--	--	--	--	--
--	--	89.5568	0.07051	--	--	--	--	242.865	0.08415	--	--	--	--	--	--	--	--	--	--
--	--	89.3377	0.07041	--	--	--	--	243.209	0.08433	--	--	--	--	--	--	--	--	--	--
--	--	89.2053	0.0703	--	--	--	--	243.553	0.08453	--	--	--	--	--	--	--	--	--	--
--	--	88.9938	0.07018	--	--	--	--	243.897	0.08472	--	--	--	--	--	--	--	--	--	--
--	--	88.7366	0.07006	--	--	--	--	244.24	0.08489	--	--	--	--	--	--	--	--	--	--
--	--	88.57	0.06992	--	--	--	--	244.584	0.08506	--	--	--	--	--	--	--	--	--	--
--	--	88.3762	0.06977	--	--	--	--	244.928	0.08527	--	--	--	--	--	--	--	--	--	--
--	--	88.1638	0.06961	--	--	--	--	245.272	0.08544	--	--	--	--	--	--	--	--	--	--
--	--	87.9581	0.06942	--	--	--	--	245.616	0.0856	--	--	--	--	--	--	--	--	--	--
--	--	87.7407	0.06922	--	--	--	--	245.959	0.08576	--	--	--	--	--	--	--	--	--	--
--	--	87.5209	0.06899	--	--	--	--	246.303	0.08594	--	--	--	--	--	--	--	--	--	--
--	--	87.3128	0.06876	--	--	--	--	246.647	0.08613	--	--	--	--	--	--	--	--	--	--
--	--	87.1207	0.06851	--	--	--	--	246.991	0.08631	--	--	--	--	--	--	--	--	--	--
--	--	86.8853	0.06826	--	--	--	--	247.335	0.08647	--	--	--	--	--	--	--	--	--	--
--	--	86.7122	0.06803	--	--	--	--	247.678	0.08662	--	--	--	--	--	--	--	--	--	--
--	--	86.4605	0.0678	--	--	--	--	248.022	0.08679	--	--	--	--	--	--	--	--	--	--
--	--	86.2826	0.0676	--	--	--	--	248.366	0.08696	--	--	--	--	--	--	--	--	--	--
--	--	86.1155	0.0674	--	--	--	--	248.71	0.08714	--	--	--	--	--	--	--	--	--	--
--	--	85.8729	0.06723	--	--	--	--	249.054	0.08732	--	--	--	--	--	--	--	--	--	--
--	--	85.6079	0.06707	--	--	--	--	249.397	0.0875	--	--	--	--	--	--	--	--	--	--
--	--	85.3943	0.06692	--	--	--	--	249.741	0.08768	--	--	--	--	--	--	--	--	--	--
--	--	85.1914	0.06678	--	--	--	--	250.085	0.08786	--	--	--	--	--	--	--	--	--	--
--	--	84.9794	0.06664	--	--	--	--	250.429	0.08802	--	--	--	--	--	--	--	--	--	--
--	--	84.79	0.06649	--	--	--	--	250.773	0.08817	--	--	--	--	--	--	--	--	--	--
--	--	84.5562	0.06634	--	--	--	--	251.117	0.08832	--	--	--	--	--	--	--	--	--	--
--	--	84.3974	0.06618	--	--	--	--	251.46	0.08849	--	--	--	--	--	--	--	--	--	--
--	--	84.1737	0.066	--	--	--	--	251.804	0.08865	--	--	--	--	--	--	--	--	--	--
--	--	83.9686	0.06581	--	--	--	--	252.148	0.08883	--	--	--	--	--	--	--	--	--	--
--	--	83.7942	0.06561	--	--	--	--	252.492	0.08901	--	--	--	--	--	--	--	--	--	--
--	--	83.5758	0.06541	--	--	--	--	252.836	0.08919	--	--	--	--	--	--	--	--	--	--
--	--	83.3474	0.06521	--	--	--	--	253.179	0.08937	--	--	--	--	--	--	--	--	--	--
--	--	83.1368	0.06502	--	--	--	--	253.523	0.08955	--	--	--	--	--	--	--	--	--	--
--	--	82.975	0.06484	--	--	--	--	253.867	0.08971	--	--	--	--	--	--	--	--	--	--
--	--	82.7546	0.06467	--	--	--	--	254.211	0.08988	--	--	--	--	--	--	--	--	--	--
--	--	82.5398	0.06451	--	--	--	--	254.555	0.09006	--	--	--	--	--	--	--	--	--	--
--	--	82.3078	0.06436	--	--	--	--	254.898	0.09026	--	--	--	--	--	--	--	--	--	--
--	--	82.0767	0.06421	--	--	--	--	255.242	0.09044	--	--	--	--	--	--	--	--	--	--
--	--	81.9082	0.06406	--	--	--	--	255.586	0.09063	--	--	--	--	--	--	--	--	--	--
--	--	81.6871	0.0639	--	--	--	--	255.93	0.09081	--	--	--	--	--	--	--	--	--	--
--	--	81.4756	0.06373	--	--	--	--	256.274	0.09098	--	--	--	--	--	--	--	--	--	--
--	--	81.2636	0.06355	--	--	--	--	256.617	0.09112	--	--	--	--	--	--	--	--	--	--
--	--	81.0244	0.06337	--	--	--	--	256.961	0.09126	--	--	--	--	--	--	--	--	--	--
--	--	80.8356	0.06319	--	--	--	--	257.305	0.09141	--	--	--	--	--	--	--	--	--	--
--	--	80.6037	0.06302	--	--	--	--	257.649	0.09157	--	--	--	--	--	--	--	--	--	--
--	--	80.4063	0.06286	--	--	--	--	257.993	0.09175	--	--	--	--	--	--	--	--	--	--
--	--	80.1804	0.0627	--	--	--	--	258.336	0.0919	--	--	--	--	--	--	--	--	--	--
--	--	79.9644	0.06255	--	--	--	--	258.68	0.09202	--	--	--	--	--	--	--	--	--	--
--	--	79.736	0.06239	--	--	--	--	259.024	0.09215	--	--	--	--	--	--	--	--	--	--
--	--	79.5631	0.06222	--	--	--	--	259.368	0.09229	--	--	--	--	--	--	--	--	--	--
--	--	79.3546	0.06203	--	--	--	--	259.712	0.09243	--	--	--	--	--	--	--	--	--	--
--	--	79.1566	0.06183	--	--	--	--	260.055	0.09258	--	--	--	--	--	--	--	--	--	--
--	--	78.9252	0.06161	--	--	--	--	260.399	0.09275	--	--	--	--	--	--	--	--	--	--
--	--	78.7462	0.06139	--	--	--	--	260.743	0.09296	--	--	--	--	--	--	--	--	--	--
--	--	78.5337	0.06118	--	--	--	--	261.087	0.09317	--	--	--	--	--	--	--	--	--	--
--	--	78.3303	0.06099	--	--	--	--	261.431	0.09338	--	--	--	--	--	--	--	--	--	--
--	--	78.137	0.06082	--	--	--	--	261.775	0.09354	--	--	--	--	--	--	--	--	--	--
--	--	77.939	0.06067	--	--	--	--	262.118	0.0937	--	--	--	--	--	--	--	--	--	--
--	--	77.7057	0.06052	--	--	--	--	262.462	0.09383	--	--	--	--	--	--	--	--	--	--
--	--	77.4894	0.06039	--	--	--	--	262.806	0.09395	--	--	--	--	--	--	--	--	--	--
--	--	77.2845	0.06025	--	--	--	--	263.15	0.09407	--	--	--	--	--	--	--	--	--	--
--	--	77.0781	0.06011	--	--	--	--	263.494	0.09421	--	--	--	--	--	--	--	--	--	--
--	--	76.881	0.05997	--	--	--	--	263.837	0.09434	--	--	--	--	--	--	--	--	--	--
--	--	76.6705	0.05983	--	--	--	--	264.181	0.09449	--	--	--	--	--	--	--	--	--	--
--	--	76.4288	0.0597	--	--	--	--	264.525	0.09464	--	--	--	--	--	--	--	--	--	--
--	--	76.2078	0.05958	--	--	--	--	264.869	0.09481	--	--	--	--	--	--	--	--	--	--
--	--	76.0092	0.05947	--	--	--	--	265.213	0.09497	--	--	--	--	--	--	--	--	--	--
--	--	75.7952	0.05937	--	--	--	--	265.556	0.09515	--	--	--	--	--	--	--	--	--	--
--	--	75.5789	0.05927	--	--	--	--	265.9	0.09529	--	--	--	--	--	--	--	--	--	--
--	--	75.3381	0.05917	--	--	--	--	266.244	0.09544	--	--	--	--	--	--	--	--	--	--
--	--	75.22	0.05906	--	--	--	--	266.588	0.0956	--	--	--	--	--	--	--	--	--	--
--	--	74.9115	0.05895	--	--	--	--	266.932	0.09578	--	--	--	--	--	--	--	--	--	--
--	--	74.7253	0.05882	--	--	--	--	267.275	0.09593	--	--	--	--	--	--	--	--	--	--
--	--	74.539	0.05869	--	--	--	--	267.619	0.09607	--	--	--	--	--	--	--	--	--	--
--	--	74.311	0.05856	--	--	--	--	267.963	0.0962	--	--	--	--	--	--	--	--	--	--
--	--	74.0946	0.05841	--	--	--	--	268.307	0.09634	--	--	--	--	--	--	--	--	--	--
--	--	73.8948	0.05827	--	--	--	--	268.651	0.09648	--	--	--	--	--	--	--	--	--	--
--	--	73.6893	0.05812	--	--	--	--	268.995	0.09662	--	--	--	--	--	--	--	--	--	--
--	--	73.5008	0.05797	--	--	--	--	269.338	0.09674	--	--	--	--	--	--	--	--	--	--
--	--	73.2622	0.05782	--	--	--	--	269.682	0.09689	--	--	--	--	--	--	--	--	--	--
--	--	73.0709	0.05768	--	--	--	--	270.026	0.09705	--	--	--	--	--	--	--	--	--	--
--	--	72.8505	0.05755	--	--	--	--	270.37	0.09722	--	--	--	--	--	--	--	--	--	--
--	--	72.6374	0.05742	--	--	--	--	270.714	0.09737	--	--	--	--	--	--	--	--	--	--
--	--	72.437	0.05731	--	--	--	--	271.057	0.09752	--	--	--	--	--	--	--	--	--	--
--	--	72.186	0.05721	--	--	--	--	271.401	0.09766	--	--	--	--	--	--	--	--	--	--
--	--	71.9961	0.05712	--	--	--	--	271.745	0.09782	--	--	--	--	--	--	--	--	--	--
--	--	71.7494	0.05703	--	--	--	--	272.089	0.09795	--	--	--	--	--	--	--	--	--	--
--	--	71.5591	0.05693	--	--	--	--	272.433	0.09807	--	--	--	--	--	--	--	--	--	--
--	--	71.3231	0.05683	--	--	--	--	272.776	0.09819	--	--	--	--	--	--	--	--	--	--
--	--	71.0794	0.05672	--	--	--	--	273.12	0.09831	--	--	--	--	--	--	--	--	--	--
--	--	70.8845	0.05661	--	--	--	--	273.464	0.09844	--	--	--	--	--	--	--	--	--	--
--	--	70.6576	0.05649	--	--	--	--	273.808	0.09859	--	--	--	--	--	--	--	--	--	--
--	--	70.4197	0.05636	--	--	--	--	274.152	0.09875	--	--	--	--	--	--	--	--	--	--
--	--	70.1783	0.05623	--	--	--	--	274.495	0.09889	--	--	--	--	--	--	--	--	--	--
--	--	69.9943	0.0561	--	--	--	--	274.839	0.09904	--	--	--	--	--	--	--	--	--	--
--	--	69.7573	0.05596	--	--	--	--	275.183	0.09918	--	--	--	--	--	--	--	--	--	--
--	--	69.568	0.05583	--	--	--	--	275.527	0.0993	--	--	--	--	--	--	--	--	--	--
--	--	69.3935	0.05568	--	--	--	--	275.871	0.0994	--	--	--	--	--	--	--	--	--	--
--	--	69.1541	0.05554	--	--	--	--	276.214	0.09952	--	--	--	--	--	--	--	--	--	--
--	--	68.9225	0.05538	--	--	--	--	276.558	0.09964	--	--	--	--	--	--	--	--	--	--
--	--	68.7166	0.05522	--	--	--	--	276.902	0.09977	--	--	--	--	--	--	--	--	--	--
--	--	68.5112	0.05505	--	--	--	--	277.246	0.09991	--	--	--	--	--	--	--	--	--	--
--	--	68.3031	0.05487	--	--	--	--	277.59	0.10006	--	--	--	--	--	--	--	--	--	--
--	--	68.0904	0.05469	--	--	--	--	277.933	0.10021	--	--	--	--	--	--	--	--	--	--
--	--	67.8794	0.05452	--	--	--	--	278.277	0.10034	--	--	--	--	--	--	--	--	--	--
--	--	67.6345	0.05434	--	--	--	--	278.621	0.10046	--	--	--	--	--	--	--	--	--	--
--	--	67.4328	0.05416	--	--	--	--	278.965	0.10058	--	--	--	--	--	--	--	--	--	--
--	--	67.2092	0.05398	--	--	--	--	279.309	0.1007	--	--	--	--	--	--	--	--	--	--
--	--	66.9908	0.05381	--	--	--	--	279.653	0.10083	--	--	--	--	--	--	--	--	--	--
--	--	66.7336	0.05363	--	--	--	--	279.996	0.10097	--	--	--	--	--	--	--	--	--	--
--	--	66.5319	0.05345	--	--	--	--	280.34	0.10112	--	--	--	--	--	--	--	--	--	--
--	--	66.2902	0.05328	--	--	--	--	280.684	0.10128	--	--	--	--	--	--	--	--	--	--
--	--	66.0662	0.05312	--	--	--	--	281.028	0.10143	--	--	--	--	--	--	--	--	--	--
--	--	65.8472	0.053	--	--	--	--	281.372	0.10156	--	--	--	--	--	--	--	--	--	--
--	--	65.6211	0.05291	--	--	--	--	281.715	0.10169	--	--	--	--	--	--	--	--	--	--
--	--	65.3929	0.05285	--	--	--	--	282.059	0.10181	--	--	--	--	--	--	--	--	--	--
--	--	65.1295	0.0528	--	--	--	--	282.403	0.10193	--	--	--	--	--	--	--	--	--	--
--	--	64.9412	0.05275	--	--	--	--	282.747	0.10204	--	--	--	--	--	--	--	--	--	--
--	--	64.7289	0.05268	--	--	--	--	283.091	0.10214	--	--	--	--	--	--	--	--	--	--
--	--	64.4942	0.05257	--	--	--	--	283.434	0.10225	--	--	--	--	--	--	--	--	--	--
--	--	64.319	0.05243	--	--	--	--	283.778	0.10237	--	--	--	--	--	--	--	--	--	--
--	--	64.0763	0.05225	--	--	--	--	284.122	0.10249	--	--	--	--	--	--	--	--	--	--
--	--	63.8535	0.05205	--	--	--	--	284.466	0.10262	--	--	--	--	--	--	--	--	--	--
--	--	63.6493	0.05184	--	--	--	--	284.81	0.10274	--	--	--	--	--	--	--	--	--	--
--	--	63.4327	0.05165	--	--	--	--	285.153	0.10287	--	--	--	--	--	--	--	--	--	--
--	--	63.1869	0.05146	--	--	--	--	285.497	0.10301	--	--	--	--	--	--	--	--	--	--
--	--	62.9734	0.05129	--	--	--	--	285.841	0.10317	--	--	--	--	--	--	--	--	--	--
--	--	62.7331	0.05112	--	--	--	--	286.185	0.10333	--	--	--	--	--	--	--	--	--	--
--	--	62.5358	0.05096	--	--	--	--	286.529	0.1035	--	--	--	--	--	--	--	--	--	--
--	--	62.2698	0.05081	--	--	--	--	286.872	0.10366	--	--	--	--	--	--	--	--	--	--
--	--	62.0383	0.05067	--	--	--	--	287.216	0.10381	--	--	--	--	--	--	--	--	--	--
--	--	61.8104	0.05054	--	--	--	--	287.56	0.10395	--	--	--	--	--	--	--	--	--	--
--	--	61.5631	0.05045	--	--	--	--	287.904	0.10407	--	--	--	--	--	--	--	--	--	--
--	--	61.3332	0.05037	--	--	--	--	288.248	0.10417	--	--	--	--	--	--	--	--	--	--
--	--	61.1029	0.05031	--	--	--	--	288.592	0.10426	--	--	--	--	--	--	--	--	--	--
--	--	60.8298	0.05025	--	--	--	--	288.935	0.10434	--	--	--	--	--	--	--	--	--	--
--	--	60.589	0.05019	--	--	--	--	289.279	0.10443	--	--	--	--	--	--	--	--	--	--
--	--	60.3605	0.0501	--	--	--	--	289.623	0.10454	--	--	--	--	--	--	--	--	--	--
--	--	60.097	0.05	--	--	--	--	289.967	0.10466	--	--	--	--	--	--	--	--	--	--
--	--	59.9023	0.04987	--	--	--	--	290.311	0.10476	--	--	--	--	--	--	--	--	--	--
--	--	59.6515	0.04973	--	--	--	--	290.654	0.10486	--	--	--	--	--	--	--	--	--	--
--	--	59.4169	0.04957	--	--	--	--	290.998	0.10496	--	--	--	--	--	--	--	--	--	--
--	--	59.195	0.04942	--	--	--	--	291.342	0.10506	--	--	--	--	--	--	--	--	--	--
--	--	58.9808	0.04927	--	--	--	--	291.686	0.10515	--	--	--	--	--	--	--	--	--	--
--	--	58.715	0.04912	--	--	--	--	292.03	0.10522	--	--	--	--	--	--	--	--	--	--
--	--	58.5075	0.04899	--	--	--	--	292.373	0.10531	--	--	--	--	--	--	--	--	--	--
--	--	58.2613	0.04887	--	--	--	--	292.717	0.10543	--	--	--	--	--	--	--	--	--	--
--	--	58.0016	0.04876	--	--	--	--	293.061	0.10555	--	--	--	--	--	--	--	--	--	--
--	--	57.7256	0.04867	--	--	--	--	293.405	0.10566	--	--	--	--	--	--	--	--	--	--
--	--	57.4398	0.04858	--	--	--	--	293.749	0.10576	--	--	--	--	--	--	--	--	--	--
--	--	57.1789	0.04851	--	--	--	--	294.092	0.10584	--	--	--	--	--	--	--	--	--	--
--	--	56.9286	0.04844	--	--	--	--	294.436	0.10593	--	--	--	--	--	--	--	--	--	--
--	--	56.6204	0.04836	--	--	--	--	294.78	0.10601	--	--	--	--	--	--	--	--	--	--
--	--	56.3458	0.04827	--	--	--	--	295.124	0.10608	--	--	--	--	--	--	--	--	--	--
--	--	56.0394	0.04817	--	--	--	--	295.468	0.10614	--	--	--	--	--	--	--	--	--	--
--	--	55.712	0.04805	--	--	--	--	295.811	0.10623	--	--	--	--	--	--	--	--	--	--
--	--	55.479	0.04792	--	--	--	--	296.155	0.10633	--	--	--	--	--	--	--	--	--	--
--	--	55.1649	0.04779	--	--	--	--	296.499	0.10643	--	--	--	--	--	--	--	--	--	--
--	--	54.9061	0.04766	--	--	--	--	296.843	0.1065	--	--	--	--	--	--	--	--	--	--
--	--	54.6798	0.04753	--	--	--	--	297.187	0.10656	--	--	--	--	--	--	--	--	--	--
--	--	54.413	0.04741	--	--	--	--	297.531	0.10661	--	--	--	--	--	--	--	--	--	--
--	--	54.1664	0.0473	--	--	--	--	297.874	0.10666	--	--	--	--	--	--	--	--	--	--
--	--	53.9246	0.04719	--	--	--	--	298.218	0.10671	--	--	--	--	--	--	--	--	--	--
--	--	53.6793	0.04707	--	--	--	--	298.562	0.10674	--	--	--	--	--	--	--	--	--	--
--	--	53.4396	0.04695	--	--	--	--	298.906	0.10677	--	--	--	--	--	--	--	--	--	--
--	--	53.1736	0.04681	--	--	--	--	299.25	0.10681	--	--	--	--	--	--	--	--	--	--
--	--	52.9165	0.04666	--	--	--	--	299.593	0.10683	--	--	--	--	--	--	--	--	--	--
--	--	52.6606	0.0465	--	--	--	--	299.937	0.10685	--	--	--	--	--	--	--	--	--	--
--	--	52.3902	0.04633	--	--	--	--	300.281	0.10686	--	--	--	--	--	--	--	--	--	--
--	--	52.1028	0.04615	--	--	--	--	300.625	0.10688	--	--	--	--	--	--	--	--	--	--
--	--	51.8664	0.04597	--	--	--	--	300.969	0.1069	--	--	--	--	--	--	--	--	--	--
--	--	51.5907	0.04579	--	--	--	--	301.312	0.10692	--	--	--	--	--	--	--	--	--	--
--	--	51.3234	0.04562	--	--	--	--	301.656	0.10694	--	--	--	--	--	--	--	--	--	--
--	--	51.036	0.04545	--	--	--	--	302	0.10697	--	--	--	--	--	--	--	--	--	--
--	--	50.7578	0.04528	--	--	--	--	--	--	--	--	--	--	--	--	--	--	--	--
--	--	50.4463	0.04512	--	--	--	--	--	--	--	--	--	--	--	--	--	--	--	--
--	--	50.1938	0.04497	--	--	--	--	--	--	--	--	--	--	--	--	--	--	--	--
--	--	49.9139	0.04482	--	--	--	--	--	--	--	--	--	--	--	--	--	--	--	--
--	--	49.6491	0.04468	--	--	--	--	--	--	--	--	--	--	--	--	--	--	--	--
--	--	49.3719	0.04454	--	--	--	--	--	--	--	--	--	--	--	--	--	--	--	--
--	--	49.1209	0.0444	--	--	--	--	--	--	--	--	--	--	--	--	--	--	--	--
--	--	48.8292	0.04425	--	--	--	--	--	--	--	--	--	--	--	--	--	--	--	--
--	--	48.5677	0.04411	--	--	--	--	--	--	--	--	--	--	--	--	--	--	--	--
--	--	48.2751	0.04395	--	--	--	--	--	--	--	--	--	--	--	--	--	--	--	--
--	--	47.9839	0.04379	--	--	--	--	--	--	--	--	--	--	--	--	--	--	--	--
--	--	47.7105	0.04363	--	--	--	--	--	--	--	--	--	--	--	--	--	--	--	--
--	--	47.4499	0.04346	--	--	--	--	--	--	--	--	--	--	--	--	--	--	--	--
--	--	47.1685	0.0433	--	--	--	--	--	--	--	--	--	--	--	--	--	--	--	--
--	--	46.895	0.04314	--	--	--	--	--	--	--	--	--	--	--	--	--	--	--	--
--	--	46.5752	0.043	--	--	--	--	--	--	--	--	--	--	--	--	--	--	--	--
--	--	46.3011	0.04287	--	--	--	--	--	--	--	--	--	--	--	--	--	--	--	--
--	--	45.9925	0.04275	--	--	--	--	--	--	--	--	--	--	--	--	--	--	--	--
--	--	45.6834	0.04264	--	--	--	--	--	--	--	--	--	--	--	--	--	--	--	--
--	--	45.3684	0.04253	--	--	--	--	--	--	--	--	--	--	--	--	--	--	--	--
--	--	45.0476	0.04241	--	--	--	--	--	--	--	--	--	--	--	--	--	--	--	--
--	--	44.7528	0.04228	--	--	--	--	--	--	--	--	--	--	--	--	--	--	--	--
--	--	44.4639	0.04213	--	--	--	--	--	--	--	--	--	--	--	--	--	--	--	--
--	--	44.1504	0.04196	--	--	--	--	--	--	--	--	--	--	--	--	--	--	--	--
--	--	43.8325	0.04178	--	--	--	--	--	--	--	--	--	--	--	--	--	--	--	--
--	--	43.5214	0.04159	--	--	--	--	--	--	--	--	--	--	--	--	--	--	--	--
--	--	43.1887	0.0414	--	--	--	--	--	--	--	--	--	--	--	--	--	--	--	--
--	--	42.8627	0.04122	--	--	--	--	--	--	--	--	--	--	--	--	--	--	--	--
--	--	42.5207	0.04104	--	--	--	--	--	--	--	--	--	--	--	--	--	--	--	--
--	--	42.164	0.04088	--	--	--	--	--	--	--	--	--	--	--	--	--	--	--	--
--	--	41.8488	0.04072	--	--	--	--	--	--	--	--	--	--	--	--	--	--	--	--
--	--	41.5125	0.04057	--	--	--	--	--	--	--	--	--	--	--	--	--	--	--	--
--	--	41.1684	0.04041	--	--	--	--	--	--	--	--	--	--	--	--	--	--	--	--
--	--	40.8065	0.04026	--	--	--	--	--	--	--	--	--	--	--	--	--	--	--	--
--	--	40.4844	0.0401	--	--	--	--	--	--	--	--	--	--	--	--	--	--	--	--
--	--	40.1136	0.03994	--	--	--	--	--	--	--	--	--	--	--	--	--	--	--	--
--	--	39.7326	0.03977	--	--	--	--	--	--	--	--	--	--	--	--	--	--	--	--
--	--	39.3558	0.0396	--	--	--	--	--	--	--	--	--	--	--	--	--	--	--	--
--	--	38.9765	0.03943	--	--	--	--	--	--	--	--	--	--	--	--	--	--	--	--
--	--	38.6184	0.03926	--	--	--	--	--	--	--	--	--	--	--	--	--	--	--	--
--	--	38.2552	0.03908	--	--	--	--	--	--	--	--	--	--	--	--	--	--	--	--
--	--	37.8943	0.0389	--	--	--	--	--	--	--	--	--	--	--	--	--	--	--	--
--	--	37.5148	0.03872	--	--	--	--	--	--	--	--	--	--	--	--	--	--	--	--
--	--	37.1153	0.03855	--	--	--	--	--	--	--	--	--	--	--	--	--	--	--	--
--	--	36.6865	0.03837	--	--	--	--	--	--	--	--	--	--	--	--	--	--	--	--
--	--	36.271	0.0382	--	--	--	--	--	--	--	--	--	--	--	--	--	--	--	--
--	--	35.8631	0.03802	--	--	--	--	--	--	--	--	--	--	--	--	--	--	--	--
--	--	35.4831	0.03786	--	--	--	--	--	--	--	--	--	--	--	--	--	--	--	--
--	--	35.086	0.03769	--	--	--	--	--	--	--	--	--	--	--	--	--	--	--	--
--	--	34.6263	0.03752	--	--	--	--	--	--	--	--	--	--	--	--	--	--	--	--
--	--	34.1649	0.03735	--	--	--	--	--	--	--	--	--	--	--	--	--	--	--	--
--	--	33.7109	0.03719	--	--	--	--	--	--	--	--	--	--	--	--	--	--	--	--
--	--	33.2128	0.03701	--	--	--	--	--	--	--	--	--	--	--	--	--	--	--	--
--	--	32.7369	0.03684	--	--	--	--	--	--	--	--	--	--	--	--	--	--	--	--
--	--	32.2556	0.03666	--	--	--	--	--	--	--	--	--	--	--	--	--	--	--	--
--	--	31.7574	0.03649	--	--	--	--	--	--	--	--	--	--	--	--	--	--	--	--
--	--	31.2042	0.03631	--	--	--	--	--	--	--	--	--	--	--	--	--	--	--	--
--	--	30.6763	0.03614	--	--	--	--	--	--	--	--	--	--	--	--	--	--	--	--
--	--	30.1208	0.03598	--	--	--	--	--	--	--	--	--	--	--	--	--	--	--	--
--	--	29.5361	0.03582	--	--	--	--	--	--	--	--	--	--	--	--	--	--	--	--
--	--	28.9608	0.03566	--	--	--	--	--	--	--	--	--	--	--	--	--	--	--	--
--	--	28.3405	0.03551	--	--	--	--	--	--	--	--	--	--	--	--	--	--	--	--
--	--	27.7144	0.03536	--	--	--	--	--	--	--	--	--	--	--	--	--	--	--	--
--	--	27.0626	0.03521	--	--	--	--	--	--	--	--	--	--	--	--	--	--	--	--
--	--	26.3822	0.03505	--	--	--	--	--	--	--	--	--	--	--	--	--	--	--	--
--	--	25.6608	0.0349	--	--	--	--	--	--	--	--	--	--	--	--	--	--	--	--
--	--	24.9057	0.03476	--	--	--	--	--	--	--	--	--	--	--	--	--	--	--	--
--	--	24.107	0.03461	--	--	--	--	--	--	--	--	--	--	--	--	--	--	--	--
--	--	23.3051	0.03448	--	--	--	--	--	--	--	--	--	--	--	--	--	--	--	--
--	--	22.4844	0.03435	--	--	--	--	--	--	--	--	--	--	--	--	--	--	--	--
--	--	21.4836	0.03423	--	--	--	--	--	--	--	--	--	--	--	--	--	--	--	--
--	--	20.4834	0.03412	--	--	--	--	--	--	--	--	--	--	--	--	--	--	--	--
--	--	19.4298	0.03401	--	--	--	--	--	--	--	--	--	--	--	--	--	--	--	--
--	--	18.3162	0.03391	--	--	--	--	--	--	--	--	--	--	--	--	--	--	--	--
--	--	17.114	0.03381	--	--	--	--	--	--	--	--	--	--	--	--	--	--	--	--
--	--	15.8704	0.03372	--	--	--	--	--	--	--	--	--	--	--	--	--	--	--	--
--	--	14.5374	0.03363	--	--	--	--	--	--	--	--	--	--	--	--	--	--	--	--
--	--	13.1134	0.03357	--	--	--	--	--	--	--	--	--	--	--	--	--	--	--	--
--	--	11.6838	0.03351	--	--	--	--	--	--	--	--	--	--	--	--	--	--	--	--
--	--	10.124	0.03348	--	--	--	--	--	--	--	--	--	--	--	--	--	--	--	--
--	--	8.8808	0.03346	--	--	--	--	--	--	--	--	--	--	--	--	--	--	--	--
--	--	7.5164	0.03346	--	--	--	--	--	--	--	--	--	--	--	--	--	--	--	--
--	--	6.5339	0.03347	--	--	--	--	--	--	--	--	--	--	--	--	--	--	--	--
--	--	5.66284	0.03348	--	--	--	--	--	--	--	--	--	--	--	--	--	--	--	--
--	--	4.89508	0.03351	--	--	--	--	--	--	--	--	--	--	--	--	--	--	--	--
--	--	4.37474	0.03353	--	--	--	--	--	--	--	--	--	--	--	--	--	--	--	--
--	--	3.84457	0.03355	--	--	--	--	--	--	--	--	--	--	--	--	--	--	--	--
--	--	3.61876	0.03358	--	--	--	--	--	--	--	--	--	--	--	--	--	--	--	--
--	--	3.14358	0.03359	--	--	--	--	--	--	--	--	--	--	--	--	--	--	--	--
--	--	2.94133	0.03361	--	--	--	--	--	--	--	--	--	--	--	--	--	--	--	--
--	--	2.76068	0.03362	--	--	--	--	--	--	--	--	--	--	--	--	--	--	--	--
--	--	2.63698	0.03363	--	--	--	--	--	--	--	--	--	--	--	--	--	--	--	--
--	--	2.47793	0.03364	--	--	--	--	--	--	--	--	--	--	--	--	--	--	--	--
--	--	2.37582	0.03365	--	--	--	--	--	--	--	--	--	--	--	--	--	--	--	--
--	--	2.27372	0.03366	--	--	--	--	--	--	--	--	--	--	--	--	--	--	--	--
--	--	2.17357	0.03367	--	--	--	--	--	--	--	--	--	--	--	--	--	--	--	--
--	--	2.09307	0.03368	--	--	--	--	--	--	--	--	--	--	--	--	--	--	--	--
--	--	1.98114	0.03369	--	--	--	--	--	--	--	--	--	--	--	--	--	--	--	--
--	--	1.85744	0.0337	--	--	--	--	--	--	--	--	--	--	--	--	--	--	--	--
--	--	1.69839	0.03371	--	--	--	--	--	--	--	--	--	--	--	--	--	--	--	--
		--	--
		--	--
		--	--
		--	--
		--	--
		--	--
		--	--
		--	--
		--	--
		--	--
		--	--
		--	--
		--	--
		--	--
		--	--
		--	--
		--	--
		--	--
		--	--
		--	--
		--	--
		--	--
		--	--
		--	--
		--	--
		--	--
		--	--
		--	--
		--	--
		--	--
		--	--
		--	--
		--	--
		--	--
		--	--
		--	--
		--	--
		--	--
		--	--
		--	--
		--	--
		--	--
		--	--
		--	--
		--	--
		--	--
		--	--
		--	--
		--	--
		--	--
		--	--
		--	--
		--	--
		--	--
		--	--
		--	--
		--	--
		--	--
		--	--
		--	--
		--	--
		--	--
		--	--
		--	--
		--	--
		--	--
		--	--
		--	--
		--	--
		--	--
		--	--
		--	--
		--	--
		--	--
		--	--
		--	--
		--	--
		--	--
		--	--
		--	--
		--	--
		--	--
		--	--
		--	--
		--	--
		--	--
		--	--
		--	--
		--	--
		--	--
		--	--
		--	--
		--	--
		--	--
		--	--
		--	--
		--	--
		--	--
		--	--
		--	--
		--	--
		--	--
		--	--
		--	--
		--	--
		--	--
		--	--
		--	--
		--	--
		--	--
		--	--
		--	--
		--	--
		--	--
		--	--
		--	--
		--	--
		--	--
		--	--
		--	--
		--	--
		--	--
		--	--
		--	--
		--	--
		--	--
		--	--
		--	--
		--	--
		--	--
		--	--
		--	--
		--	--
		--	--
		--	--
		--	--
		--	--
		--	--
		--	--
		--	--
		--	--
		--	--
		--	--
		--	--
		--	--
		--	--
		--	--
		--	--
		--	--
		--	--
		--	--
		--	--
		--	--
		--	--
		--	--
		--	--
		--	--
		--	--
		--	--
		--	--
		--	--
		--	--
		--	--
		--	--
		--	--
		--	--
		--	--
		--	--
		--	--
		--	--
		--	--
		--	--
		--	--
		--	--
		--	--
		--	--
		--	--
		--	--
		--	--
		--	--
		--	--
		--	--
		--	--
		--	--
		--	--
		--	--
		--	--
		--	--
		--	--
		--	--
		--	--
		--	--
		--	--
		--	--
		--	--
		--	--
		--	--
		--	--
		--	--
		--	--
		--	--
		--	--
		--	--
		--	--
		--	--
		--	--
		--	--
		--	--
		--	--
		--	--
		--	--
		--	--
		--	--
		--	--
		--	--
		--	--
		--	--
		--	--
		--	--
		--	--
		--	--
		--	--
		--	--
		--	--
		--	--
		--	--
		--	--
		--	--
		--	--
		--	--
		--	--
		--	--
		--	--
		--	--
		--	--
		--	--
		--	--
		--	--
		--	--
		--	--
		--	--
		--	--
		--	--
		--	--
		--	--
		--	--
		--	--
		--	--
		--	--
		--	--
		--	--
		--	--
		--	--
		--	--
		--	--
		--	--
		--	--
		--	--
		--	--
		--	--
		--	--
		--	--
		--	--
		--	--
		--	--
		--	--
		--	--
		--	--
		--	--
		--	--
		--	--
		--	--
		--	--
		--	--
		--	--
		--	--
		--	--
		--	--
		--	--
		--	--
		--	--
		--	--
		--	--
		--	--
		--	--
		--	--
		--	--
		--	--
		--	--
		--	--
		--	--
		--	--
		--	--
		--	--
		--	--
		--	--
		--	--
		--	--
		--	--
		--	--
		--	--
		--	--
		--	--
		--	--
		--	--
		--	--
		--	--
		--	--
		--	--
		--	--
		--	--
		--	--
		--	--
		--	--
		--	--
		--	--
		--	--
		--	--
		--	--
		--	--
		--	--
		--	--
		--	--
		--	--
		--	--
		--	--
		--	--
		--	--
		--	--
		--	--
		--	--
		--	--
		--	--
		--	--
		--	--
		--	--
		--	--
		--	--
		--	--
		--	--
		--	--
		--	--
		--	--
		--	--
		--	--
		--	--
		--	--
		--	--
		--	--
		--	--
		--	--
		--	--
		--	--
		--	--
		--	--
		--	--
		--	--
		--	--
		--	--
		--	--
		--	--
		--	--
		--	--
		--	--
		--	--
		--	--
		--	--
		--	--
		--	--
		--	--
		--	--
		--	--
		--	--
		--	--
		--	--
		--	--
		--	--
		--	--
		--	--
		--	--
		--	--
		--	--
		--	--
		--	--
		--	--
		--	--
		--	--
		--	--
		--	--
		--	--
		--	--
		--	--
		--	--
		--	--
		--	--
		--	--
		--	--
		--	--
		--	--
		--	--
		--	--
		--	--
		--	--
		--	--
		--	--
		--	--
		--	--
		--	--
		--	--
		--	--
		--	--
		--	--
		--	--
		--	--
		--	--
		--	--
		--	--
		--	--
		--	--
		--	--
		--	--
		--	--
		--	--
		--	--
		--	--
		--	--
		--	--
		--	--
		--	--
		--	--
		--	--
		--	--
		--	--
		--	--
		--	--
		--	--
		--	--
		--	--
		--	--
		--	--
		--	--
		--	--
		--	--
		--	--
		--	--
		--	--
		--	--
		--	--
		--	--
		--	--
		--	--
		--	--
		--	--
		--	--
		--	--
		--	--
		--	--
		--	--
		--	--
		--	--
		--	--
		--	--
		--	--
		--	--
		--	--
		--	--
		--	--
		--	--
		--	--
		--	--
		--	--
		--	--
		--	--
		--	--
		--	--
		--	--
		--	--
		--	--
		--	--
		--	--
		--	--
		--	--
		--	--
		--	--
		--	--
		--	--
		--	--
		--	--
		--	--
		--	--
		--	--
		--	--
		--	--
		--	--
		--	--
		--	--
		--	--
		--	--
		--	--
		--	--
		--	--
		--	--
		--	--
		--	--
		--	--
		--	--
		--	--
		--	--
		--	--
		--	--
		--	--
		--	--
		--	--
		--	--
		--	--
		--	--
		--	--
		--	--
		--	--
		--	--
		--	--
		--	--
		--	--
		--	--
		--	--
		--	--
		--	--
		--	--
		--	--
		--	--
		--	--
		--	--
		--	--
		--	--
		--	--
		--	--
		--	--
		--	--
		--	--
		--	--
		--	--
		--	--
		--	--
		--	--
		--	--
		--	--
		--	--
		--	--
		--	--
		--	--
		--	--
		--	--
		--	--
		--	--
		--	--
		--	--
		--	--
		--	--
		--	--
		--	--
		--	--
		--	--
		--	--
		--	--
		--	--
		--	--
		--	--
		--	--
		--	--
		--	--
		--	--
		--	--
		--	--
		--	--
		--	--
		--	--
		--	--
		--	--
		--	--
		--	--
		--	--
		--	--
		--	--
		--	--
		--	--
		--	--
		--	--
		--	--
		--	--
		--	--
		--	--
		--	--
		--	--
		--	--
		--	--
		--	--
		--	--
		--	--
		--	--
		--	--
		--	--
		--	--
		--	--
		--	--
		--	--
		--	--
		--	--
		--	--
		--	--
		--	--
		--	--
		--	--
		--	--
		--	--
		--	--
		--	--
		--	--
		--	--
		--	--
		--	--
		--	--
		--	--
		--	--
		--	--
		--	--
		--	--
		--	--
		--	--
		--	--
		--	--
		--	--
		--	--
		--	--
		--	--
		--	--
		--	--
		--	--
		--	--
		--	--
		--	--
		--	--
		--	--
		--	--
		--	--
		--	--
		--	--
		--	--
		--	--
		--	--
		--	--
		--	--
		--	--
		--	--
		--	--
		--	--
		--	--
		--	--
		--	--
		--	--
		--	--
		--	--
		--	--
		--	--
		--	--
		--	--
		--	--
		--	--
		--	--
		--	--
		--	--
		--	--
		--	--
		--	--
		--	--
		--	--
		--	--
		--	--
		--	--
		--	--
		--	--
		--	--
		--	--
		--	--
		--	--
		--	--
		--	--
		--	--
		--	--
		--	--
		--	--
		--	--
		--	--
		--	--
		--	--
		--	--
		--	--
		--	--
		--	--
		--	--
		--	--
		--	--
		--	--
		--	--
		--	--
		--	--
		--	--
		--	--
		--	--
		--	--
		--	--
		--	--
		--	--
		--	--
		--	--
		--	--
		--	--
		--	--
		--	--
		--	--
		--	--
		--	--
		--	--
		--	--
		--	--
		--	--
		--	--
		--	--
		--	--
		--	--
		--	--
		--	--
		--	--
		--	--
		--	--
		--	--
		--	--
		--	--
		--	--
		--	--
		--	--
		--	--
		--	--
		--	--
		--	--
		--	--
		--	--
		--	--
		--	--
		--	--
		--	--
		--	--
		--	--
		--	--
		--	--
		--	--
		--	--
		--	--
		--	--
		--	--
		--	--
		--	--
		--	--
		--	--
		--	--
		--	--
		--	--
		--	--
		--	--
		--	--
		--	--
		--	--
		--	--
		--	--
		--	--
		--	--
		--	--
		--	--
		--	--
		--	--
		--	--
		--	--
		--	--
		--	--

## Sheet: fig3d
20.2 GPa		24.8 GPa		29.2 GPa		33 GPa		37.4 GPa		42.6 GPa		47.1 GPa		52.8 GPa		56.9 GPa		61.2 GPa
T(K)	R(Ohm)	T(K)	R(Ohm)	T(K)	R(Ohm)	T(K)	R(Ohm)	T(K)	R(Ohm)	T(K)	R(Ohm)	T(K)	R(Ohm)	T(K)	R(Ohm)	T(K)	R(Ohm)	T(K)	R(Ohm)
1.6495	0.04748	299.552	0.14336	300.114	0.1349	301.182	0.12995	300.868	0.12078	301.048	0.10925	300.466	0.09221	301.298	0.07978	300.173	0.07256	300.728	0.06493
1.6506	0.04744	296.893	0.14236	298.077	0.13432	300.966	0.12974	298.716	0.11978	298.462	0.10829	297.3	0.09154	300.442	0.07946	298.231	0.07189	295.398	0.06436
1.6904	0.04741	294.739	0.1414	295.749	0.13368	300.971	0.1295	296.379	0.11882	296.193	0.10735	295.035	0.09086	299.433	0.07914	295.932	0.07124	292.394	0.06384
1.9745	0.04738	292.343	0.14049	293.129	0.13296	299.567	0.12922	294.512	0.11789	294.773	0.10643	291.737	0.09015	297.532	0.07881	292.964	0.07061	289.268	0.06335
2.0538	0.04735	290.158	0.13961	291.732	0.13218	298.625	0.12889	292.002	0.11699	292.078	0.10552	289.098	0.08943	295.864	0.07849	289.772	0.07	286.785	0.06291
2.141	0.04732	288.506	0.13877	289.346	0.13132	297.177	0.12852	289.128	0.11613	289.809	0.10464	287.317	0.0887	293.963	0.07818	286.424	0.06942	285.322	0.0625
2.1868	0.0473	286.753	0.13799	286.668	0.13038	296.12	0.12806	287.31	0.11529	287.224	0.10373	285.323	0.08792	292.065	0.07785	283.723	0.06883	283.726	0.06214
2.2731	0.04728	284.528	0.13724	283.699	0.12934	294.924	0.12757	285.066	0.11449	285.245	0.10282	281.789	0.08713	290.709	0.07753	281.29	0.06827	282.385	0.06182
2.3538	0.04726	282.489	0.13653	281.662	0.12826	293.867	0.12712	283.248	0.11373	283.741	0.102	279.123	0.08633	289.095	0.07722	279.237	0.06776	280.722	0.06153
2.4405	0.04724	280.938	0.13585	279.334	0.12717	292.695	0.12665	281.857	0.11301	281.921	0.10128	277.576	0.08555	287.601	0.07692	277.697	0.06729	279.514	0.06126
2.5219	0.04723	279.977	0.13517	277.297	0.12612	291.891	0.12615	280.262	0.11233	280.101	0.10056	275.179	0.0848	286.709	0.07664	276.023	0.06688	278.239	0.06101
2.6097	0.04721	278.713	0.13452	274.968	0.12518	290.833	0.12566	278.656	0.11169	278.571	0.09988	272.863	0.08411	285.371	0.07638	274.616	0.06652	277.219	0.06077
2.6942	0.0472	277.116	0.13394	272.989	0.12436	289.638	0.12516	277.456	0.11109	277.067	0.09928	271.038	0.08349	284.033	0.07613	272.808	0.0662	276.066	0.06054
2.7758	0.04718	276.224	0.13338	270.952	0.12363	288.581	0.12466	276.264	0.11052	275.985	0.09869	269.451	0.08294	282.787	0.0759	271.268	0.0659	275.047	0.06032
2.8641	0.04715	275.224	0.1328	270.253	0.12298	287.133	0.12416	275.165	0.10999	274.323	0.09814	268.015	0.08246	281.641	0.07568	270.108	0.06561	274.16	0.06012
2.9482	0.04713	274.55	0.1323	268.274	0.1224	286.329	0.1237	274.182	0.10949	273.716	0.09762	266.738	0.08203	280.58	0.07547	268.66	0.06534	273.262	0.05993
3.0343	0.04711	273.387	0.13186	267.285	0.12184	285.272	0.12328	273.196	0.10903	272.661	0.09713	265.553	0.08163	279.571	0.07527	267.725	0.06508	272.242	0.05975
3.116	0.04708	272.696	0.1315	265.946	0.1213	284.214	0.12284	272.236	0.10861	271.243	0.09665	264.427	0.08125	278.926	0.07508	266.676	0.06484	271.475	0.05958
3.2035	0.04706	272.022	0.13112	264.258	0.12078	283.042	0.12243	271.382	0.10822	270.386	0.09622	263.422	0.0809	278.233	0.07489	265.798	0.0646	270.646	0.05943
3.2901	0.04703	271.246	0.1308	263.268	0.12022	282.238	0.12197	270.512	0.10786	269.627	0.09581	262.393	0.08057	277.224	0.0747	264.997	0.06437	269.881	0.05929
3.3726	0.04702	270.449	0.13048	261.58	0.1197	281.318	0.12154	269.672	0.10753	268.572	0.0954	261.458	0.08026	276.332	0.07452	264.14	0.06415	269.261	0.05915
3.4608	0.047	269.982	0.13016	260.519	0.11918	280.514	0.12112	268.999	0.10721	267.965	0.09502	260.623	0.07998	275.75	0.07434	263.291	0.06392	268.485	0.05903
3.5422	0.04696	269.021	0.12981	259.003	0.11872	279.595	0.12072	268.278	0.1069	266.884	0.0947	259.736	0.07975	275.053	0.07417	262.482	0.0637	267.892	0.05891
3.6307	0.04694	268.364	0.12948	258.062	0.1183	278.675	0.12035	267.599	0.1066	266.588	0.09441	258.95	0.07955	274.334	0.074	261.651	0.06348	267.191	0.05879
3.7124	0.0469	267.788	0.12917	257.322	0.1179	277.733	0.11996	266.928	0.10632	265.546	0.09414	258.298	0.07939	273.637	0.07384	260.902	0.06326	266.491	0.05867
3.7978	0.04687	267.167	0.12883	256.611	0.11754	277.342	0.11958	266.237	0.10604	264.773	0.09385	257.591	0.07924	273.066	0.07369	260.108	0.06304	265.745	0.05854
3.8839	0.04685	266.392	0.12848	255.837	0.11719	276.285	0.11922	265.606	0.10577	264.461	0.09359	256.965	0.07908	272.411	0.07353	259.081	0.06284	264.992	0.0584
3.9669	0.04682	265.718	0.12816	255.166	0.11686	275.504	0.11885	264.96	0.10551	263.85	0.09334	256.27	0.07891	271.775	0.07338	258.603	0.06265	264.395	0.05827
4.0558	0.04679	265.1	0.12785	254.494	0.1165	274.447	0.11842	264.307	0.10527	262.953	0.09312	255.685	0.07874	271.206	0.07322	257.982	0.06247	263.625	0.05813
4.1396	0.04677	264.451	0.1276	253.839	0.11613	273.504	0.11798	263.749	0.10505	262.346	0.09292	255.064	0.07855	270.637	0.07306	257.407	0.0623	262.982	0.05799
4.2277	0.04676	263.756	0.12738	253.169	0.11578	272.585	0.11756	263.109	0.10484	262.006	0.09272	254.478	0.07835	269.95	0.0729	256.691	0.06214	262.244	0.05787
4.3133	0.04674	263.105	0.12714	252.493	0.11544	271.39	0.11716	262.516	0.10464	261.331	0.09252	253.829	0.07817	269.36	0.07273	255.988	0.06199	261.566	0.05775
4.3951	0.04673	262.507	0.12694	251.961	0.11513	270.218	0.11674	261.878	0.10445	260.742	0.09233	253.329	0.07798	268.781	0.07258	255.297	0.06184	260.746	0.05763
4.4798	0.04672	261.795	0.12675	251.345	0.11483	269.413	0.11633	261.277	0.10425	260.065	0.09216	252.729	0.07781	268.309	0.07242	254.6	0.06167	260.095	0.05751
4.5666	0.0467	261.199	0.12651	250.662	0.11456	268.356	0.1159	260.689	0.10405	259.601	0.09197	252.168	0.07762	267.722	0.07227	253.939	0.0615	259.498	0.05738
4.6544	0.04668	260.396	0.1262	250.082	0.11428	267.161	0.11545	260.093	0.10384	258.973	0.09177	251.701	0.07744	267.215	0.07213	253.176	0.06131	258.8	0.05725
4.7647	0.04667	259.782	0.12584	249.541	0.114	265.575	0.11504	259.555	0.1036	258.435	0.09157	251.045	0.07724	266.401	0.07199	252.495	0.06112	258.107	0.0571
4.8147	0.04666	259.134	0.1255	249.038	0.11371	264.794	0.11463	259.013	0.10335	257.907	0.09139	250.532	0.07704	266.003	0.07185	251.944	0.06093	257.527	0.05696
4.9013	0.04663	258.453	0.12514	248.435	0.11344	263.461	0.11421	258.427	0.10311	257.246	0.09122	250.018	0.07685	265.521	0.07172	251.135	0.06075	256.786	0.05681
4.9941	0.04662	257.83	0.12482	247.827	0.11316	262.14	0.11384	257.914	0.10288	256.667	0.09105	249.513	0.07666	264.921	0.07159	250.534	0.06056	256.146	0.05666
5.0791	0.04661	257.238	0.12446	247.277	0.1129	261.602	0.11351	257.342	0.10265	256.11	0.09087	249.011	0.07647	264.362	0.07146	249.863	0.06039	255.458	0.05652
5.1622	0.04658	256.566	0.12409	246.815	0.11259	260.903	0.11324	256.818	0.10243	255.553	0.0907	248.554	0.07631	263.781	0.07133	249.21	0.06022	254.807	0.05638
5.2488	0.04657	255.835	0.12383	246.258	0.11227	260.321	0.11297	256.277	0.10222	254.96	0.09055	247.989	0.07615	263.238	0.0712	248.496	0.06006	254.13	0.05624
5.331	0.04653	255.252	0.12358	245.666	0.11195	259.704	0.11277	255.74	0.10201	254.421	0.09039	247.48	0.07599	262.787	0.07108	248.017	0.0599	253.431	0.0561
5.418	0.04651	254.614	0.12328	245.1	0.11162	259.279	0.11258	255.185	0.1018	253.894	0.09024	247.083	0.07585	262.101	0.07096	247.329	0.05975	252.776	0.05597
5.5057	0.0465	254.015	0.12303	244.563	0.11128	258.698	0.11239	254.622	0.10161	253.27	0.09009	246.512	0.07571	261.563	0.07085	246.708	0.05961	252.095	0.05584
5.59	0.0465	253.304	0.12271	244.056	0.11096	258.125	0.11221	254.098	0.1014	252.679	0.08991	245.972	0.07557	261.01	0.07074	246.08	0.05947	251.382	0.0557
5.6749	0.0465	252.65	0.12239	243.511	0.11066	257.623	0.11204	253.538	0.1012	252.165	0.08975	245.498	0.07542	260.346	0.07062	245.39	0.05934	250.655	0.05557
5.7616	0.04649	252.018	0.12204	242.892	0.1104	256.979	0.11187	252.976	0.10098	251.489	0.08955	245.006	0.07528	259.884	0.07051	244.747	0.05921	250.041	0.05543
5.8438	0.0465	251.293	0.12168	242.227	0.11014	256.454	0.11169	252.452	0.10076	250.829	0.08932	244.534	0.07513	259.363	0.07039	244.16	0.05908	249.338	0.0553
5.9288	0.04649	250.677	0.12124	241.833	0.10992	255.893	0.11148	251.902	0.10054	250.413	0.0891	243.987	0.07498	258.882	0.07027	243.508	0.05894	248.663	0.05516
6.0134	0.04648	249.955	0.12085	241.31	0.10966	255.353	0.11124	251.321	0.1003	249.772	0.08888	243.514	0.07482	258.365	0.07016	242.797	0.0588	248.065	0.05504
6.1008	0.04648	249.327	0.12049	240.66	0.10943	254.842	0.11097	250.803	0.10006	249.265	0.08868	243.066	0.07467	257.833	0.07004	242.149	0.05865	247.471	0.05492
6.1859	0.04644	248.699	0.12016	240.213	0.10921	254.336	0.11071	250.212	0.09983	248.834	0.08848	242.528	0.07452	257.216	0.06992	241.514	0.05849	246.801	0.0548
6.2757	0.04642	248.097	0.11984	239.731	0.10898	253.67	0.11042	249.669	0.09961	248.205	0.08832	242.064	0.07437	256.739	0.06981	240.919	0.05834	246.083	0.05468
6.3558	0.04641	247.578	0.11964	239.184	0.10874	253.026	0.11014	249.175	0.09941	247.668	0.08819	241.514	0.07423	256.202	0.0697	240.143	0.05818	245.475	0.05456
6.4421	0.04639	246.828	0.11942	238.719	0.10849	252.613	0.10986	248.677	0.09922	247.212	0.08806	241.023	0.07409	255.681	0.06959	239.642	0.05803	244.879	0.05443
6.5284	0.04637	246.119	0.11921	238.034	0.10827	251.979	0.1096	248.151	0.09904	246.606	0.08795	240.489	0.07395	255.119	0.06947	239.006	0.05788	244.113	0.05431
6.6108	0.04636	245.566	0.11897	237.656	0.10805	251.431	0.10934	247.603	0.09885	246.004	0.08779	239.979	0.07382	254.607	0.06935	238.446	0.05773	243.573	0.05418
6.698	0.04636	244.93	0.1187	237.13	0.10783	250.815	0.10907	247.104	0.09866	245.562	0.08762	239.497	0.07368	254.116	0.06923	237.828	0.05759	242.856	0.05406
6.7772	0.04635	244.332	0.11842	236.503	0.10765	250.264	0.1088	246.586	0.09846	245.073	0.08746	239.044	0.07354	253.486	0.06909	237.172	0.05745	242.163	0.05393
6.866	0.04635	243.593	0.11815	236.135	0.10748	249.794	0.10852	246.084	0.09825	244.539	0.08722	238.522	0.0734	252.9	0.06895	236.596	0.05731	241.482	0.0538
6.9503	0.04635	243.018	0.11782	235.522	0.10733	249.221	0.10827	245.539	0.09803	243.934	0.08698	238.11	0.07327	252.46	0.0688	235.997	0.05718	240.888	0.05368
7.0379	0.04634	242.339	0.11748	235.016	0.1072	248.717	0.10803	244.998	0.09781	243.277	0.08672	237.602	0.07313	251.816	0.06864	235.321	0.05704	240.198	0.05355
7.1202	0.04634	241.597	0.11717	234.508	0.10705	248.204	0.1078	244.5	0.0976	242.661	0.08645	237.184	0.073	251.314	0.06848	234.758	0.05691	239.518	0.05341
7.2039	0.04633	241.032	0.11691	234.006	0.10689	247.639	0.10756	243.935	0.09739	242.327	0.08622	236.67	0.07287	250.766	0.06831	234.066	0.05679	238.926	0.05328
7.291	0.04631	240.339	0.11663	233.418	0.1067	247.13	0.10733	243.413	0.09719	241.792	0.08601	236.252	0.07273	250.224	0.06815	233.464	0.05666	238.293	0.05314
7.3681	0.0463	239.641	0.11636	232.955	0.10649	246.603	0.10708	242.895	0.09698	241.252	0.08584	235.684	0.07259	249.686	0.06798	232.805	0.05654	237.662	0.053
7.4606	0.0463	239.083	0.11611	232.415	0.10623	246.089	0.10686	242.334	0.09676	240.686	0.08568	235.225	0.07246	249.249	0.06781	232.299	0.05641	236.988	0.05286
7.5446	0.04628	238.497	0.11588	231.907	0.10597	245.485	0.1066	241.803	0.09652	240.132	0.08554	234.728	0.07232	248.617	0.06765	231.551	0.05627	236.381	0.05272
7.6293	0.04626	237.874	0.11566	231.551	0.10575	245.008	0.10636	241.26	0.09627	239.666	0.08541	234.29	0.07217	248.236	0.0675	230.906	0.05613	235.819	0.05258
7.7152	0.04623	237.26	0.11547	230.802	0.1055	244.416	0.10614	240.693	0.09602	239.088	0.08525	233.826	0.07203	247.644	0.06735	230.357	0.05598	235.157	0.05244
7.7978	0.04622	236.693	0.11521	230.331	0.10528	243.951	0.10594	240.156	0.09577	238.675	0.08509	233.266	0.07189	247.118	0.06722	229.662	0.05584	234.499	0.0523
7.8827	0.04621	236.006	0.11493	229.849	0.10509	243.341	0.10572	239.683	0.09554	238.127	0.08493	232.819	0.07176	246.616	0.06708	229.093	0.05569	233.982	0.05217
7.9711	0.0462	235.412	0.11466	229.337	0.1049	242.864	0.10554	239.2	0.09533	237.602	0.08474	232.329	0.07163	246.115	0.06695	228.613	0.05555	233.287	0.05204
8.0561	0.04621	234.841	0.11438	228.873	0.10471	242.306	0.10531	238.703	0.09515	237.109	0.08457	231.895	0.07151	245.503	0.06682	227.917	0.0554	232.647	0.05191
8.1384	0.04621	234.166	0.11406	228.357	0.10454	241.792	0.10513	238.18	0.09499	236.624	0.08438	231.344	0.07139	245.007	0.0667	227.379	0.05525	231.974	0.05179
8.2266	0.04621	233.575	0.11377	227.905	0.10432	241.126	0.10494	237.673	0.09484	236.078	0.08418	230.878	0.07127	244.595	0.06658	226.712	0.0551	231.317	0.05167
8.3095	0.04621	232.908	0.11354	227.431	0.1041	240.674	0.10473	237.204	0.09468	235.573	0.08397	230.377	0.07115	243.961	0.06646	226.169	0.05494	230.744	0.05155
8.3942	0.04619	232.318	0.11331	226.93	0.10387	240.142	0.10451	236.702	0.09452	235.036	0.08377	229.918	0.07102	243.449	0.06635	225.651	0.05479	230.075	0.05142
8.4765	0.04618	231.552	0.11307	226.393	0.10367	239.613	0.10429	236.182	0.09434	234.513	0.08356	229.45	0.07089	242.927	0.06624	224.992	0.05463	229.411	0.0513
8.5639	0.04616	231.06	0.11287	225.811	0.10344	239.04	0.10406	235.633	0.09416	234.113	0.08338	228.989	0.07076	242.395	0.06613	224.307	0.05448	228.792	0.05118
8.5492	0.04615	230.267	0.11262	225.452	0.10323	238.615	0.10383	235.131	0.09397	233.534	0.0832	228.53	0.07063	241.869	0.06602	223.748	0.05434	228.259	0.05106
8.6735	0.04614	229.745	0.11238	224.881	0.10302	238.049	0.1036	234.603	0.09377	233.057	0.08308	228.058	0.0705	241.272	0.06591	223.142	0.0542	227.614	0.05093
8.7887	0.04612	229.096	0.11211	224.369	0.10281	237.605	0.10339	234.119	0.09357	232.514	0.08292	227.625	0.07037	240.834	0.06581	222.565	0.05407	226.936	0.05081
8.8929	0.04611	228.519	0.1118	223.829	0.1026	237.013	0.10317	233.635	0.09338	231.902	0.08272	227.19	0.07025	240.308	0.06572	221.968	0.05393	226.388	0.05069
8.9781	0.04609	228.011	0.11148	223.281	0.10239	236.496	0.10299	233.094	0.09319	231.414	0.0825	226.792	0.07013	239.791	0.06562	221.285	0.0538	225.766	0.05056
9.0706	0.04608	227.324	0.11118	222.927	0.10217	236.02	0.10276	232.575	0.09301	230.871	0.08227	226.25	0.07001	239.202	0.06553	220.8	0.05367	225.104	0.05043
9.1562	0.04607	226.793	0.11089	222.274	0.10194	235.446	0.10252	232.091	0.09284	230.402	0.08203	225.79	0.06989	238.728	0.06543	220.125	0.05354	224.54	0.0503
9.2416	0.04605	226.17	0.11062	221.859	0.10173	234.97	0.10227	231.501	0.09267	229.79	0.08177	225.379	0.06976	238.201	0.06533	219.54	0.05341	223.905	0.05016
9.3218	0.04605	225.6	0.11034	221.421	0.10153	234.488	0.10202	231.014	0.09251	229.334	0.08151	224.953	0.06964	237.751	0.06521	218.97	0.05327	223.244	0.05002
9.4113	0.04604	224.948	0.11014	220.727	0.10133	233.941	0.10175	230.456	0.09234	228.78	0.08125	224.449	0.0695	237.245	0.06509	218.422	0.05313	222.686	0.04989
9.493	0.04605	224.421	0.10993	220.345	0.10112	233.383	0.10149	229.934	0.09216	228.372	0.08101	224.022	0.06936	236.758	0.06496	217.868	0.05298	221.927	0.04976
9.5783	0.04604	223.72	0.10971	219.861	0.10092	232.906	0.10124	229.453	0.09196	227.831	0.08082	223.534	0.06921	236.214	0.06482	217.235	0.05283	221.314	0.04962
9.6601	0.04602	223.145	0.10947	219.377	0.10072	232.355	0.10098	229.002	0.09176	227.391	0.08062	223.036	0.06907	235.725	0.06469	216.661	0.05269	220.687	0.04949
9.7474	0.04601	222.548	0.10921	218.859	0.10051	231.858	0.10071	228.518	0.09155	226.859	0.08043	222.602	0.06893	235.224	0.06456	216.132	0.05256	220.026	0.04937
9.8358	0.046	221.917	0.10894	218.408	0.10029	231.374	0.10049	227.957	0.09134	226.382	0.08025	222.05	0.06878	234.641	0.06443	215.536	0.05243	219.459	0.04924
9.9145	0.04602	221.308	0.1087	217.916	0.10005	230.775	0.10024	227.483	0.09113	225.905	0.08011	221.648	0.06863	234.23	0.06431	214.988	0.05231	218.837	0.04911
10.0024	0.04603	220.709	0.10842	217.43	0.09983	230.239	0.09998	227.013	0.09091	225.308	0.07997	221.152	0.06847	233.749	0.0642	214.384	0.05219	218.28	0.04898
10.0056	0.04604	220.125	0.10814	216.993	0.09965	229.837	0.09973	226.529	0.0907	224.935	0.07982	220.669	0.06832	233.14	0.06407	213.728	0.05205	217.694	0.04885
10.0051	0.04603	219.533	0.10786	216.453	0.09945	229.285	0.09949	226.046	0.09051	224.315	0.07966	220.227	0.06818	232.739	0.06394	213.251	0.05191	217.103	0.04873
10.0036	0.04601	218.988	0.10762	215.986	0.09928	228.781	0.09925	225.476	0.09031	223.842	0.07949	219.714	0.06803	232.104	0.06381	212.696	0.05175	216.528	0.0486
10.3335	0.04599	218.434	0.10739	215.534	0.0991	228.311	0.09904	225.02	0.09012	223.383	0.07931	219.348	0.06789	231.652	0.06366	212.081	0.05157	215.911	0.04847
10.7455	0.04594	217.804	0.10714	214.962	0.09892	227.837	0.09881	224.507	0.08994	222.779	0.07914	218.93	0.06776	231.043	0.0635	211.488	0.05139	215.463	0.04836
11.4865	0.04589	217.229	0.10689	214.596	0.09875	227.291	0.09858	223.995	0.08975	222.275	0.07898	218.435	0.06764	230.571	0.06335	210.949	0.05122	214.961	0.04825
12.3332	0.04583	216.603	0.10663	214.035	0.09858	226.797	0.09834	223.508	0.08956	221.816	0.07884	218.032	0.06753	230.051	0.06319	210.335	0.05106	214.459	0.04815
13.1838	0.04578	216.143	0.10639	213.559	0.09839	226.3	0.09818	222.966	0.08937	221.259	0.07868	217.561	0.06742	229.524	0.06303	209.672	0.05092	214.02	0.04805
14.0759	0.04575	215.446	0.10617	213.136	0.09816	225.774	0.09799	222.435	0.08918	220.777	0.07854	217.171	0.06731	229.085	0.06289	209.319	0.05079	213.492	0.04795
14.987	0.04573	214.881	0.10592	212.56	0.09795	225.299	0.0978	221.913	0.08899	220.25	0.07838	216.712	0.06721	228.605	0.06275	208.678	0.05066	213.008	0.04786
16.1405	0.04571	214.344	0.10567	212.127	0.09777	224.811	0.09764	221.406	0.0888	219.768	0.07823	216.245	0.06711	228.118	0.06262	208.12	0.05054	212.57	0.04777
16.9243	0.0457	213.714	0.10541	211.657	0.09761	224.305	0.09748	220.9	0.08862	219.327	0.07807	215.803	0.06701	227.644	0.06249	207.576	0.05042	212.029	0.04768
17.7664	0.04571	213.149	0.10516	211.087	0.09746	223.77	0.0973	220.411	0.08844	218.853	0.07791	215.378	0.0669	227.137	0.06236	207.061	0.0503	211.61	0.04759
18.4382	0.04571	212.526	0.10493	210.598	0.09728	223.385	0.09713	219.883	0.08826	218.399	0.07775	214.989	0.06679	226.589	0.06224	206.466	0.05018	211.103	0.0475
19.1927	0.04574	211.988	0.10468	210.14	0.09711	222.844	0.09691	219.423	0.08808	217.96	0.0776	214.482	0.06668	226.096	0.06211	205.861	0.05006	210.653	0.04741
20.0018	0.04577	211.403	0.10442	209.681	0.09694	222.258	0.09671	218.937	0.08789	217.442	0.07742	214.053	0.06656	225.619	0.06198	205.268	0.04996	210.088	0.04732
20.8471	0.04583	210.739	0.10413	209.216	0.09679	221.681	0.09649	218.445	0.0877	216.96	0.07726	213.649	0.06643	225.183	0.06184	204.811	0.04987	209.648	0.04723
21.7181	0.04589	210.182	0.10387	208.685	0.09661	221.193	0.09629	217.988	0.0875	216.423	0.07707	213.095	0.06628	224.621	0.0617	204.24	0.04978	209.269	0.04713
22.5488	0.04597	209.58	0.10362	208.304	0.09642	220.75	0.09607	217.506	0.08731	216.016	0.07689	212.662	0.06613	224.16	0.06156	203.597	0.04968	208.761	0.04703
23.4093	0.04606	209.075	0.10339	207.841	0.09623	220.243	0.09587	217.059	0.08712	215.434	0.07672	212.229	0.06597	223.638	0.06141	203.174	0.04957	208.268	0.04694
24.2298	0.04616	208.471	0.10316	207.392	0.09608	219.709	0.0957	216.533	0.08693	214.961	0.07655	211.806	0.06582	223.191	0.06126	202.466	0.04945	207.864	0.04684
25.1008	0.04626	207.963	0.10292	206.81	0.09592	219.251	0.09552	216.035	0.08675	214.556	0.07635	211.318	0.06567	222.865	0.06111	201.985	0.04932	207.392	0.04674
25.9168	0.04636	207.434	0.10268	206.446	0.09573	218.73	0.09535	215.596	0.08657	214.005	0.07617	210.872	0.06553	222.33	0.06096	201.368	0.04919	206.917	0.04665
26.7776	0.04645	206.847	0.10243	205.977	0.09554	218.267	0.09517	215.133	0.0864	213.566	0.076	210.375	0.0654	221.952	0.06082	200.831	0.04906	206.503	0.04657
27.6161	0.04656	206.256	0.10217	205.446	0.09533	217.788	0.09498	214.616	0.08623	213.101	0.07582	209.934	0.06527	221.44	0.06069	200.192	0.04894	206.002	0.04648
28.4514	0.04666	205.707	0.10189	204.982	0.09513	217.324	0.09478	214.112	0.08605	212.601	0.07562	209.552	0.06514	220.966	0.06056	199.702	0.04883	205.563	0.04639
29.2924	0.04677	205.162	0.10161	204.529	0.09495	216.842	0.09458	213.626	0.08589	212.137	0.07545	209.106	0.06501	220.561	0.06044	199.124	0.04872	205.088	0.04631
30.1605	0.04688	204.564	0.10136	204.011	0.0948	216.433	0.09439	213.156	0.08571	211.639	0.07528	208.657	0.06488	220.111	0.06033	198.623	0.04861	204.653	0.04622
30.978	0.047	203.979	0.10113	203.584	0.09463	215.863	0.0942	212.643	0.08554	211.058	0.07513	208.268	0.06475	219.697	0.06022	198.214	0.0485	204.152	0.04612
31.8391	0.04711	203.479	0.10092	203.011	0.09443	215.4	0.09402	212.177	0.08535	210.513	0.07499	207.783	0.06463	219.252	0.06012	197.62	0.04838	203.666	0.04602
32.6475	0.04723	202.819	0.1007	202.623	0.09422	214.967	0.09383	211.657	0.08515	210.096	0.07483	207.457	0.06452	218.864	0.06001	197.093	0.04826	203.25	0.04593
33.5172	0.04735	202.307	0.10046	202.124	0.094	214.383	0.09363	211.167	0.08495	209.599	0.07466	206.979	0.06441	218.464	0.0599	196.577	0.04814	202.787	0.04583
34.3588	0.04749	201.737	0.10021	201.7	0.09377	213.947	0.09342	210.691	0.08473	209.168	0.07448	206.581	0.06431	218.028	0.05979	196.007	0.04804	202.205	0.04573
35.1879	0.04763	201.135	0.09994	201.185	0.09356	213.43	0.09325	210.172	0.08452	208.738	0.0743	206.152	0.0642	217.582	0.05967	195.472	0.04794	201.798	0.04563
35.995	0.0478	200.549	0.09966	200.642	0.09334	213.031	0.09306	209.69	0.08431	208.272	0.07413	205.765	0.06408	217.152	0.05954	194.942	0.04785	201.358	0.04554
36.9031	0.04795	199.946	0.0994	200.212	0.09315	212.437	0.09286	209.247	0.0841	207.726	0.07396	205.31	0.06395	216.703	0.05942	194.317	0.04777	200.869	0.04544
37.7306	0.04812	199.441	0.09914	199.675	0.09296	212.038	0.09267	208.84	0.0839	207.315	0.07381	204.826	0.0638	216.27	0.05928	193.865	0.04768	200.44	0.04535
38.5181	0.04828	198.924	0.0989	199.262	0.09279	211.489	0.09248	208.334	0.08371	206.869	0.07368	204.432	0.06365	215.818	0.05915	193.28	0.04758	199.928	0.04525
39.3886	0.04843	198.34	0.09867	198.832	0.09262	210.988	0.0923	207.907	0.08352	206.398	0.07355	204.017	0.0635	215.36	0.05903	192.799	0.04747	199.581	0.04515
40.269	0.04858	197.839	0.09845	198.434	0.09243	210.463	0.09211	207.448	0.08334	205.945	0.0734	203.504	0.06336	214.906	0.05891	192.168	0.04736	199.13	0.04505
41.0791	0.04872	197.279	0.09823	197.968	0.09222	210.012	0.09191	206.981	0.08316	205.488	0.07324	203.064	0.06323	214.436	0.05879	191.656	0.04724	198.661	0.04495
41.8899	0.04887	196.743	0.09804	197.54	0.09199	209.494	0.0917	206.492	0.08296	205.034	0.07306	202.655	0.0631	213.979	0.05869	191.091	0.04711	198.261	0.04485
42.8551	0.04904	196.235	0.09781	197.034	0.09178	209.109	0.09148	206.025	0.08276	204.534	0.07291	202.222	0.06299	213.608	0.05859	190.528	0.04699	197.768	0.04476
43.6135	0.04922	195.744	0.09756	196.602	0.09155	208.531	0.0913	205.583	0.08257	204.037	0.07277	201.77	0.06289	213.06	0.05849	189.972	0.04687	197.366	0.04466
44.6311	0.0494	195.066	0.09729	196.185	0.09132	208.157	0.09109	205.119	0.08237	203.611	0.07264	201.374	0.06279	212.589	0.05839	189.463	0.04675	196.932	0.04456
45.5033	0.04958	194.595	0.09702	195.722	0.09111	207.642	0.09088	204.656	0.08217	203.108	0.07253	200.875	0.06269	212.116	0.05828	189.011	0.04664	196.434	0.04447
46.6847	0.04978	194.021	0.09676	195.234	0.0909	207.233	0.09067	204.158	0.08199	202.648	0.07242	200.473	0.06258	211.694	0.05818	188.421	0.04652	196.017	0.04438
47.2318	0.04999	193.461	0.09653	194.82	0.09073	206.799	0.09048	203.704	0.08182	202.242	0.07229	200.036	0.06247	211.145	0.05808	187.941	0.04641	195.548	0.04429
47.874	0.05022	192.9	0.09631	194.355	0.09057	206.351	0.09031	203.229	0.08164	201.71	0.07214	199.587	0.06236	210.733	0.05798	187.463	0.0463	195.13	0.04421
49.103	0.05047	192.379	0.0961	193.912	0.09041	205.844	0.09015	202.79	0.08147	201.235	0.07197	199.166	0.06224	210.216	0.05789	186.886	0.04619	194.657	0.04413
50.1972	0.05071	191.789	0.09592	193.378	0.0902	205.329	0.09002	202.302	0.0813	200.789	0.07178	198.749	0.06212	209.781	0.05779	186.41	0.04608	194.195	0.04405
51.1566	0.05095	191.287	0.09575	193.009	0.09	204.882	0.08985	201.806	0.08111	200.32	0.07157	198.435	0.062	209.329	0.05769	185.897	0.04597	193.733	0.04397
52.1745	0.05119	190.748	0.09557	192.493	0.08979	204.423	0.08969	201.324	0.0809	199.817	0.07139	197.979	0.06189	208.952	0.05759	185.426	0.04585	193.326	0.04388
52.8682	0.05138	190.07	0.09538	192.107	0.08956	203.99	0.08949	200.847	0.08069	199.361	0.07121	197.619	0.06177	208.497	0.05749	184.856	0.04573	192.875	0.04379
53.3172	0.05155	189.59	0.09518	191.603	0.08933	203.455	0.08928	200.402	0.08047	198.945	0.07105	197.116	0.06165	208.022	0.05738	184.387	0.04562	192.423	0.0437
53.8349	0.0517	189.048	0.095	191.173	0.08912	202.988	0.08909	199.894	0.08027	198.455	0.07089	196.796	0.06152	207.56	0.05728	183.817	0.0455	191.957	0.04361
54.3506	0.05186	188.54	0.09484	190.679	0.08892	202.574	0.0889	199.444	0.08008	198.024	0.07075	196.374	0.0614	207.127	0.05717	183.302	0.04541	191.537	0.04352
55.0291	0.05202	188.012	0.09468	190.178	0.08874	202.068	0.08871	199.044	0.07991	197.625	0.07061	195.924	0.06128	206.726	0.05706	182.748	0.04532	191.042	0.04343
56.0041	0.05223	187.496	0.09451	189.698	0.08856	201.546	0.08852	198.568	0.07975	197.15	0.07048	195.484	0.06115	206.246	0.05695	182.246	0.04525	190.629	0.04335
56.957	0.05246	187.011	0.09432	189.305	0.08841	201.145	0.08834	198.144	0.0796	196.707	0.07037	195.115	0.06103	205.791	0.05683	181.688	0.04519	190.13	0.04326
57.9021	0.05271	186.485	0.09412	188.911	0.08825	200.669	0.08817	197.711	0.07945	196.361	0.07025	194.661	0.06092	205.388	0.05671	181.146	0.04513	189.643	0.04317
58.7762	0.05297	185.909	0.09392	188.478	0.08807	200.166	0.08798	197.236	0.07929	195.808	0.07012	194.226	0.0608	204.873	0.05659	180.585	0.04506	189.301	0.04308
59.8574	0.05323	185.42	0.0937	188.038	0.0879	199.746	0.0878	196.819	0.07914	195.403	0.06999	193.864	0.06069	204.464	0.05646	180.048	0.04497	188.86	0.04299
60.7123	0.05346	184.857	0.0935	187.684	0.08774	199.217	0.08761	196.381	0.07898	194.956	0.06987	193.401	0.06058	204.02	0.05634	179.544	0.04487	188.443	0.0429
61.4874	0.05371	184.355	0.09329	187.18	0.08757	198.794	0.08742	195.95	0.07883	194.439	0.06974	192.951	0.06046	203.506	0.05621	179.088	0.04475	188.001	0.04281
62.2584	0.05393	183.864	0.09308	186.748	0.08739	198.327	0.08727	195.473	0.07867	193.967	0.06961	192.544	0.06035	203.048	0.0561	178.591	0.04463	187.564	0.04272
63.0086	0.05416	183.334	0.09286	186.298	0.08722	197.969	0.08709	195.032	0.07851	193.573	0.06947	192.135	0.06024	202.617	0.05599	178.121	0.0445	187.118	0.04263
63.7337	0.05438	182.702	0.09263	185.876	0.08703	197.472	0.08691	194.581	0.07835	193.054	0.06931	191.701	0.06012	202.109	0.05588	177.666	0.04438	186.731	0.04255
64.4793	0.05461	182.19	0.09238	185.488	0.08684	197.04	0.08672	194.135	0.0782	192.682	0.06913	191.255	0.06001	201.727	0.05578	177.2	0.04426	186.32	0.04246
65.3538	0.05484	181.671	0.09214	185.027	0.08668	196.617	0.0865	193.662	0.07804	192.21	0.06894	190.768	0.05989	201.225	0.05568	176.709	0.04414	185.884	0.04238
66.298	0.05506	181.139	0.0919	184.495	0.08652	196.172	0.0863	193.202	0.07788	191.747	0.06876	190.376	0.05977	200.758	0.05558	176.23	0.04402	185.413	0.0423
67.2533	0.05531	180.541	0.09168	184.151	0.08635	195.712	0.08611	192.768	0.07773	191.262	0.06857	189.927	0.05965	200.318	0.05548	175.66	0.0439	184.967	0.04221
68.051	0.05555	180.018	0.09144	183.698	0.08618	195.254	0.08594	192.3	0.07758	190.814	0.0684	189.525	0.05953	199.779	0.05537	175.203	0.04379	184.621	0.04213
68.9222	0.05579	179.51	0.09123	183.266	0.08602	194.814	0.08579	191.855	0.07742	190.295	0.06826	189.121	0.05941	199.358	0.05526	174.685	0.04368	184.092	0.04204
69.7306	0.05605	179.07	0.09102	182.792	0.08587	194.384	0.08564	191.374	0.07727	189.923	0.06815	188.724	0.05929	198.937	0.05515	174.112	0.04357	183.757	0.04196
70.6247	0.05629	178.476	0.09081	182.323	0.08568	193.879	0.0855	190.912	0.07711	189.549	0.06804	188.311	0.05917	198.488	0.05504	173.711	0.04347	183.302	0.04187
71.4854	0.05654	178.026	0.09059	181.845	0.08549	193.426	0.08536	190.439	0.07694	189.066	0.06793	187.956	0.05906	198.1	0.05492	173.171	0.04337	182.858	0.04178
72.3425	0.05678	177.516	0.09037	181.481	0.08527	193.006	0.08521	189.968	0.07677	188.608	0.06781	187.498	0.05894	197.659	0.05481	172.666	0.04328	182.397	0.0417
73.1828	0.05701	177.061	0.09017	181.004	0.08505	192.528	0.08505	189.554	0.07661	188.252	0.06767	187.108	0.05882	197.23	0.05469	172.166	0.04319	181.959	0.04161
73.948	0.05723	176.463	0.08997	180.504	0.08483	192.039	0.08489	189.127	0.07644	187.79	0.06753	186.748	0.05871	196.769	0.05458	171.631	0.0431	181.479	0.04153
74.7394	0.05745	176.039	0.08976	180.06	0.08461	191.639	0.08469	188.713	0.07627	187.331	0.06737	186.321	0.05859	196.323	0.05446	171.076	0.04301	181.056	0.04144
75.5856	0.0577	175.441	0.08954	179.714	0.08439	191.159	0.08452	188.293	0.07611	186.943	0.0672	185.931	0.05848	195.869	0.05435	170.553	0.04291	180.619	0.04136
76.4604	0.05794	174.979	0.08931	179.293	0.08419	190.663	0.08435	187.851	0.07595	186.499	0.06705	185.503	0.05837	195.417	0.05423	170.029	0.04281	180.213	0.04127
77.3189	0.05818	174.51	0.08908	178.924	0.08402	190.218	0.08417	187.432	0.07579	186.089	0.06691	185.058	0.05826	195.053	0.05412	169.587	0.04271	179.748	0.04119
78.16	0.05844	173.936	0.08887	178.445	0.08388	189.786	0.08398	187.017	0.07562	185.638	0.06676	184.66	0.05816	194.582	0.054	169.183	0.04261	179.368	0.0411
78.9695	0.05871	173.45	0.08867	178.039	0.08372	189.299	0.08378	186.584	0.07545	185.263	0.06662	184.293	0.05806	194.126	0.05389	168.686	0.04252	178.92	0.04101
79.8443	0.05897	172.956	0.08845	177.688	0.08357	188.864	0.08359	186.148	0.07529	184.797	0.06648	183.9	0.05795	193.705	0.05378	168.172	0.04242	178.563	0.04092
80.692	0.05922	172.338	0.08825	177.216	0.08342	188.491	0.08342	185.725	0.07512	184.282	0.06635	183.482	0.05784	193.229	0.05367	167.743	0.04233	178.138	0.04083
81.5871	0.05948	171.919	0.08807	176.81	0.08326	188.054	0.08325	185.264	0.07495	183.883	0.06622	183.06	0.05772	192.858	0.05356	167.191	0.04225	177.692	0.04075
82.4497	0.05972	171.339	0.0879	176.325	0.08309	187.614	0.08306	184.84	0.07479	183.511	0.06608	182.614	0.0576	192.314	0.05346	166.737	0.04217	177.309	0.04066
83.2733	0.05999	170.868	0.08771	175.987	0.08291	187.202	0.08287	184.397	0.07464	183.17	0.06594	182.211	0.05749	191.919	0.05336	166.292	0.04208	176.893	0.04059
84.0932	0.06025	170.353	0.08752	175.492	0.08273	186.857	0.0827	183.943	0.07448	182.637	0.0658	181.82	0.05737	191.406	0.05326	165.786	0.042	176.498	0.04051
84.8457	0.0605	169.792	0.08732	175.122	0.08254	186.302	0.08251	183.521	0.07432	182.119	0.06566	181.348	0.05726	190.954	0.05316	165.312	0.0419	176.034	0.04044
85.7534	0.06075	169.31	0.08713	174.682	0.08236	185.849	0.08231	183.041	0.07417	181.747	0.0655	180.998	0.05715	190.526	0.05306	164.846	0.04181	175.682	0.04037
86.6504	0.06101	168.834	0.08694	174.299	0.08218	185.512	0.08212	182.606	0.07401	181.221	0.06534	180.591	0.05705	190.03	0.05296	164.395	0.04171	175.207	0.04029
87.4734	0.06126	168.32	0.08676	173.795	0.082	185.006	0.08194	182.18	0.07386	180.898	0.06519	180.1	0.05695	189.582	0.05286	163.886	0.0416	174.819	0.04022
88.3332	0.06152	167.913	0.08654	173.43	0.08181	184.541	0.08176	181.74	0.07371	180.409	0.06505	179.762	0.05685	189.204	0.05275	163.349	0.04149	174.39	0.04014
89.1408	0.06177	167.435	0.08634	172.983	0.0816	184.154	0.08162	181.31	0.07356	179.924	0.06491	179.367	0.05675	188.809	0.05265	162.897	0.04139	173.96	0.04006
89.9415	0.06204	166.921	0.08614	172.562	0.0814	183.774	0.08143	180.836	0.07341	179.565	0.06477	178.997	0.05665	188.351	0.05254	162.378	0.04129	173.605	0.03998
90.8554	0.06229	166.392	0.08595	172.107	0.08118	183.287	0.08128	180.399	0.07326	179.176	0.06463	178.64	0.05654	188.001	0.05244	161.932	0.0412	173.07	0.0399
91.7072	0.06257	165.915	0.08577	171.66	0.08096	182.815	0.08115	179.936	0.0731	178.717	0.0645	178.204	0.05644	187.544	0.05234	161.423	0.04111	172.715	0.03982
92.5417	0.06283	165.419	0.08559	171.259	0.08071	182.397	0.081	179.523	0.07295	178.335	0.06436	177.871	0.05633	187.12	0.05224	160.959	0.04103	172.31	0.03974
93.3943	0.06309	164.894	0.08541	170.797	0.08048	181.918	0.08085	179.148	0.0728	177.971	0.06423	177.463	0.05623	186.703	0.05214	160.424	0.04096	171.832	0.03966
94.1684	0.06334	164.474	0.08523	170.349	0.08028	181.498	0.0807	178.742	0.07266	177.496	0.06409	177.034	0.05612	186.317	0.05204	159.906	0.0409	171.397	0.03959
95.0183	0.06359	163.938	0.08504	169.972	0.08009	181.033	0.08053	178.333	0.07251	177.124	0.06394	176.622	0.05602	185.852	0.05195	159.464	0.04084	170.987	0.03951
95.92	0.06385	163.458	0.08486	169.501	0.07993	180.636	0.08037	177.896	0.07237	176.71	0.0638	176.284	0.05592	185.508	0.05185	158.99	0.04079	170.586	0.03944
96.771	0.06412	162.946	0.08465	169.174	0.07973	180.118	0.08022	177.515	0.07221	176.31	0.06367	175.971	0.05583	185.004	0.05176	158.568	0.04074	170.1	0.03936
97.6076	0.06436	162.411	0.08445	168.822	0.07956	179.761	0.08006	177.091	0.07205	175.937	0.06353	175.554	0.05576	184.576	0.05167	158.09	0.04069	169.702	0.03928
98.4379	0.06463	161.946	0.08425	168.356	0.0794	179.275	0.07985	176.686	0.07189	175.484	0.0634	175.12	0.05568	184.116	0.05158	157.674	0.04063	169.332	0.03921
99.2645	0.06492	161.423	0.08406	168.045	0.07921	178.98	0.07969	176.247	0.07171	175.088	0.06326	174.728	0.05561	183.717	0.05148	157.216	0.04056	168.903	0.03913
100.059	0.06523	160.889	0.08388	167.572	0.079	178.518	0.07951	175.834	0.07154	174.67	0.06313	174.318	0.05555	183.278	0.05138	156.727	0.04048	168.553	0.03905
101.017	0.06553	160.392	0.08373	167.201	0.07876	178.136	0.07931	175.407	0.07136	174.264	0.06301	173.933	0.05548	182.821	0.05128	156.309	0.04039	168.097	0.03898
101.918	0.06583	159.893	0.08354	166.788	0.07855	177.69	0.07913	175.009	0.0712	173.891	0.06289	173.526	0.0554	182.402	0.05118	155.835	0.0403	167.797	0.0389
102.746	0.06614	159.435	0.08334	166.316	0.07833	177.286	0.07896	174.604	0.07104	173.407	0.06276	173.109	0.05531	182.007	0.05108	155.331	0.0402	167.35	0.03882
103.591	0.06643	158.917	0.08316	165.939	0.07813	176.866	0.07882	174.172	0.0709	172.969	0.06263	172.703	0.05521	181.567	0.05099	154.895	0.04011	166.984	0.03874
104.382	0.06672	158.511	0.08298	165.564	0.07795	176.433	0.07872	173.766	0.07076	172.629	0.06249	172.319	0.05511	181.095	0.05089	154.403	0.04001	166.6	0.03866
105.216	0.067	158.043	0.08278	165.115	0.07776	176.023	0.07862	173.324	0.07063	172.135	0.06236	171.988	0.055	180.685	0.0508	153.967	0.03992	166.194	0.03858
106.011	0.06725	157.618	0.08261	164.72	0.07759	175.602	0.07853	172.901	0.07049	171.699	0.06222	171.53	0.0549	180.2	0.05072	153.488	0.03983	165.82	0.0385
106.771	0.06751	157.107	0.08243	164.313	0.07744	175.19	0.07841	172.457	0.07036	171.293	0.06209	171.106	0.0548	179.828	0.05064	153.017	0.03974	165.361	0.03842
107.54	0.06779	156.63	0.08225	163.896	0.07728	174.793	0.07827	172.018	0.07022	170.861	0.06197	170.723	0.05471	179.387	0.05055	152.525	0.03965	164.961	0.03835
108.344	0.06804	156.17	0.08209	163.464	0.07712	174.338	0.07811	171.63	0.07008	170.427	0.06186	170.287	0.05461	178.992	0.05047	152.023	0.03957	164.575	0.03827
109.149	0.06829	155.712	0.08195	163.088	0.07694	173.962	0.07794	171.176	0.06993	169.954	0.06175	169.878	0.05451	178.596	0.05038	151.536	0.03948	164.163	0.03819
110.03	0.06855	155.24	0.08175	162.683	0.07677	173.498	0.07776	170.71	0.06978	169.582	0.06163	169.47	0.05441	178.164	0.05028	151.052	0.0394	163.77	0.03811
110.961	0.06885	154.707	0.08155	162.208	0.0766	173.073	0.0776	170.315	0.06963	169.116	0.06152	169.188	0.05431	177.752	0.05019	150.553	0.03932	163.351	0.03803
111.964	0.06914	154.264	0.08138	161.86	0.07644	172.666	0.07744	169.888	0.06947	168.789	0.06141	168.75	0.05421	177.355	0.05009	150.138	0.03924	162.952	0.03794
112.937	0.06944	153.8	0.08119	161.444	0.07629	172.227	0.07729	169.498	0.06931	168.434	0.06128	168.394	0.05412	176.953	0.04999	149.682	0.03915	162.51	0.03786
113.757	0.06976	153.311	0.08102	160.936	0.07613	171.78	0.07714	169.064	0.06915	168.045	0.06115	168.037	0.05402	176.533	0.0499	149.225	0.03905	162.091	0.03778
114.646	0.07006	152.795	0.08085	160.542	0.07597	171.316	0.077	168.692	0.069	167.625	0.06101	167.642	0.05393	176.176	0.04981	148.842	0.03894	161.687	0.03771
115.438	0.07036	152.275	0.08066	160.152	0.07584	170.97	0.07685	168.305	0.06885	167.229	0.06089	167.267	0.05385	175.761	0.04971	148.417	0.03883	161.233	0.03764
116.252	0.07065	151.806	0.08048	159.8	0.07569	170.461	0.07671	167.928	0.06871	166.84	0.06077	166.908	0.05376	175.273	0.04962	147.923	0.03871	160.892	0.03757
117.04	0.07091	151.323	0.08029	159.366	0.07554	170.054	0.07655	167.506	0.06857	166.428	0.06064	166.542	0.05367	174.924	0.04953	147.504	0.03859	160.422	0.03751
117.792	0.07116	150.815	0.08013	159.005	0.07538	169.674	0.07641	167.129	0.06844	166.027	0.06051	166.157	0.05358	174.458	0.04943	147.108	0.03848	160.073	0.03743
118.54	0.07143	150.386	0.07994	158.589	0.07522	169.294	0.07625	166.736	0.06831	165.623	0.06039	165.758	0.05349	174.068	0.04934	146.647	0.03838	159.714	0.03736
119.302	0.07171	149.851	0.07976	158.234	0.07509	168.853	0.0761	166.288	0.06818	165.182	0.06028	165.388	0.05339	173.699	0.04925	146.215	0.03829	159.322	0.03728
120.111	0.07197	149.365	0.07962	157.843	0.07492	168.444	0.07594	165.931	0.06804	164.848	0.06016	165.005	0.0533	173.298	0.04915	145.757	0.03821	158.905	0.0372
121.03	0.07221	148.982	0.07945	157.431	0.07477	168.136	0.07577	165.531	0.06791	164.388	0.06004	164.65	0.0532	172.861	0.04906	145.311	0.03814	158.584	0.03713
121.543	0.07243	148.575	0.07932	157.098	0.07462	167.696	0.07559	165.101	0.06779	164.005	0.05991	164.232	0.05311	172.383	0.04897	144.852	0.03807	158.172	0.03705
122.104	0.07259	148.078	0.0792	156.666	0.07449	167.284	0.07543	164.706	0.06766	163.611	0.05979	163.9	0.05302	172.012	0.04888	144.401	0.03799	157.844	0.03698
122.75	0.07272	147.617	0.07905	156.325	0.07436	166.943	0.07528	164.302	0.06753	163.159	0.05966	163.463	0.05293	171.564	0.04879	143.965	0.03792	157.458	0.03691
123.241	0.07285	147.181	0.07891	155.923	0.07422	166.476	0.07512	163.883	0.0674	162.749	0.05954	163.096	0.05284	171.17	0.04869	143.528	0.03784	157.078	0.03684
123.563	0.07301	146.762	0.07877	155.562	0.07408	166.096	0.07497	163.514	0.06726	162.355	0.05942	162.714	0.05275	170.724	0.04859	143.041	0.03775	156.67	0.03678
123.802	0.0732	146.293	0.07862	155.142	0.07395	165.716	0.07483	163.049	0.06713	161.888	0.05929	162.277	0.05265	170.283	0.04849	142.624	0.03766	156.216	0.03671
124.601	0.07346	145.803	0.07843	154.713	0.07382	165.304	0.0747	162.667	0.067	161.538	0.05918	161.963	0.05255	169.859	0.04839	142.188	0.03757	155.889	0.03664
125.892	0.07378	145.385	0.07823	154.345	0.07372	164.869	0.07458	162.237	0.06686	161.136	0.05907	161.527	0.05245	169.542	0.04829	141.637	0.03748	155.48	0.03656
127.196	0.07415	144.927	0.07806	153.917	0.07358	164.501	0.07443	161.82	0.06672	160.655	0.05896	161.112	0.05234	169.1	0.04819	141.249	0.03738	155.12	0.03649
128.516	0.07457	144.464	0.07787	153.591	0.07344	164.065	0.07426	161.411	0.06657	160.299	0.05885	160.716	0.05223	168.774	0.04809	140.792	0.03729	154.725	0.03643
129.609	0.07502	144.031	0.07771	153.14	0.0733	163.659	0.07406	161.005	0.06642	159.87	0.05874	160.316	0.05213	168.368	0.04799	140.315	0.0372	154.328	0.03636
130.661	0.07547	143.52	0.07758	152.749	0.07315	163.236	0.07386	160.569	0.06627	159.5	0.05863	159.97	0.05203	167.97	0.0479	139.867	0.03712	153.94	0.03629
132.19	0.07592	143.057	0.0774	152.331	0.07299	162.878	0.07367	160.143	0.06612	159.12	0.05852	159.585	0.05194	167.611	0.04781	139.459	0.03705	153.584	0.03622
133.565	0.07636	142.587	0.07727	152.037	0.07282	162.458	0.07348	159.756	0.06598	158.73	0.05841	159.237	0.05185	167.199	0.04773	139.051	0.03698	153.193	0.03615
134.855	0.07675	142.094	0.07714	151.54	0.07267	162.032	0.07331	159.391	0.06584	158.383	0.05828	158.925	0.05176	166.827	0.04764	138.615	0.0369	152.802	0.03608
135.739	0.07711	141.632	0.07699	151.145	0.07253	161.676	0.07318	158.999	0.06571	157.994	0.05815	158.569	0.05167	166.41	0.04755	138.245	0.03683	152.391	0.036
136.469	0.07743	141.142	0.07683	150.718	0.07241	161.121	0.07307	158.629	0.06558	157.614	0.05803	158.166	0.05158	166.065	0.04746	137.846	0.03675	152.027	0.03592
137.282	0.07769	140.677	0.07669	150.318	0.07229	160.725	0.07295	158.232	0.06545	157.234	0.05791	157.778	0.05148	165.669	0.04736	137.372	0.03667	151.588	0.03585
137.928	0.07791	140.224	0.07655	149.949	0.07216	160.423	0.07282	157.854	0.06532	156.85	0.0578	157.466	0.05139	165.25	0.04727	136.961	0.03659	151.218	0.03579
138.404	0.0781	139.74	0.0764	149.578	0.07202	159.949	0.07269	157.473	0.06518	156.476	0.05768	157.105	0.05129	164.829	0.04718	136.535	0.0365	150.844	0.03573
138.811	0.07827	139.366	0.07628	149.192	0.07186	159.55	0.07256	157.109	0.06504	156.104	0.05756	156.698	0.05119	164.447	0.04709	136.083	0.03641	150.431	0.03567
139.302	0.07844	138.95	0.07613	148.793	0.07171	159.175	0.07243	156.729	0.0649	155.714	0.05744	156.398	0.0511	164.035	0.04702	135.632	0.03633	150.018	0.03562
139.779	0.0786	138.455	0.07598	148.479	0.07157	158.87	0.07229	156.332	0.06477	155.357	0.05732	156.002	0.05101	163.701	0.04694	135.236	0.03624	149.647	0.03556
140.34	0.07881	138.016	0.07585	148.086	0.07143	158.457	0.07214	155.948	0.06464	154.907	0.05719	155.659	0.05092	163.191	0.04688	134.801	0.03615	149.261	0.03551
140.915	0.07908	137.572	0.0757	147.758	0.07131	158.064	0.07201	155.541	0.06451	154.528	0.05707	155.293	0.05083	162.813	0.04681	134.4	0.03607	148.911	0.03545
141.561	0.07945	137.16	0.07554	147.356	0.07118	157.684	0.07187	155.154	0.06439	154.118	0.05696	154.878	0.05074	162.478	0.04675	133.967	0.03599	148.563	0.03539
142.693	0.0799	136.772	0.0754	147.008	0.07107	157.235	0.07172	154.809	0.06427	153.773	0.05684	154.496	0.05065	162.018	0.04667	133.459	0.03591	148.202	0.03533
144.127	0.08041	136.328	0.07527	146.614	0.07096	156.934	0.07156	154.39	0.06414	153.356	0.05673	154.111	0.05056	161.624	0.0466	133.049	0.03584	147.862	0.03526
145.474	0.08097	135.866	0.07512	146.196	0.07085	156.51	0.07142	153.984	0.06402	152.968	0.05663	153.774	0.05047	161.252	0.04652	132.62	0.03577	147.494	0.0352
146.818	0.08154	135.416	0.07495	145.847	0.07073	156.126	0.07129	153.614	0.0639	152.568	0.05652	153.378	0.05038	160.857	0.04643	132.136	0.03569	147.075	0.03513
148.003	0.08207	134.988	0.0748	145.503	0.07061	155.772	0.07118	153.215	0.06377	152.189	0.05642	152.988	0.05029	160.353	0.04634	131.732	0.03562	146.759	0.03506
149.171	0.08258	134.49	0.07464	145.062	0.07046	155.351	0.07104	152.806	0.06364	151.8	0.05632	152.63	0.05021	160.022	0.04625	131.257	0.03554	146.357	0.03499
150.153	0.08302	134.047	0.07449	144.733	0.07031	155.02	0.07091	152.432	0.06351	151.381	0.05622	152.236	0.05014	159.605	0.04615	130.815	0.03546	145.984	0.03492
151.038	0.08343	133.632	0.07434	144.365	0.07017	154.6	0.07079	152.035	0.06339	150.954	0.05612	151.872	0.05006	159.209	0.04606	130.413	0.03539	145.614	0.03485
151.905	0.08379	133.201	0.07418	143.977	0.07003	154.212	0.07068	151.636	0.06326	150.56	0.05601	151.485	0.04999	158.913	0.04596	129.94	0.03531	145.287	0.03478
152.46	0.0841	132.708	0.07403	143.581	0.06989	153.819	0.07055	151.224	0.06315	150.149	0.05591	151.122	0.04992	158.548	0.04586	129.534	0.03524	144.916	0.03472
153.076	0.08438	132.254	0.07389	143.182	0.06975	153.361	0.0704	150.794	0.06303	149.746	0.0558	150.698	0.04984	158.118	0.04576	129.171	0.03517	144.512	0.03465
153.577	0.08462	131.764	0.07375	142.787	0.06963	153.01	0.07025	150.426	0.06292	149.481	0.05571	150.368	0.04976	157.815	0.04566	128.766	0.03509	144.169	0.03459
154.045	0.08484	131.309	0.07359	142.447	0.0695	152.59	0.07011	150.013	0.0628	149.045	0.0556	149.94	0.04968	157.431	0.04556	128.368	0.03502	143.779	0.03453
154.604	0.08504	130.85	0.07342	142.013	0.06937	152.211	0.06996	149.638	0.06269	148.672	0.0555	149.62	0.04959	157.031	0.04546	127.963	0.03494	143.423	0.03447
155.138	0.08525	130.382	0.07329	141.661	0.06926	151.81	0.06982	149.277	0.06257	148.337	0.05539	149.262	0.0495	156.629	0.04536	127.557	0.03487	143.028	0.0344
155.752	0.08549	129.919	0.07314	141.221	0.06909	151.447	0.06967	148.947	0.06244	147.962	0.05528	148.88	0.04942	156.238	0.04527	127.168	0.0348	142.639	0.03434
156.537	0.08575	129.519	0.073	140.882	0.06895	151.045	0.06954	148.589	0.06231	147.634	0.05517	148.557	0.04934	155.852	0.04518	126.751	0.03473	142.266	0.03428
157.3	0.08603	129.105	0.07285	140.474	0.06881	150.624	0.0694	148.195	0.0622	147.25	0.05505	148.194	0.04926	155.516	0.0451	126.357	0.03467	141.888	0.03422
158.243	0.08635	128.71	0.07271	140.09	0.06869	150.215	0.06927	147.836	0.06208	146.875	0.05494	147.854	0.04919	155.116	0.04502	125.958	0.0346	141.508	0.03416
159.225	0.08672	128.285	0.07258	139.733	0.06858	149.868	0.06915	147.462	0.06198	146.596	0.05483	147.529	0.04912	154.735	0.04495	125.549	0.03453	141.106	0.0341
160.299	0.08713	127.883	0.07246	139.333	0.06847	149.475	0.06901	147.1	0.06188	146.178	0.05473	147.17	0.04905	154.379	0.04488	125.116	0.03446	140.692	0.03405
161.416	0.08756	127.436	0.07234	138.98	0.06837	149.136	0.06888	146.713	0.06179	145.77	0.05463	146.849	0.04898	153.93	0.04482	124.716	0.03439	140.362	0.03399
162.61	0.08802	127.039	0.07222	138.651	0.06826	148.779	0.06877	146.357	0.0617	145.454	0.05452	146.474	0.0489	153.621	0.04476	124.291	0.03431	139.978	0.03392
163.736	0.08847	126.649	0.07211	138.338	0.06818	148.432	0.06864	145.997	0.06161	145.069	0.05441	146.086	0.04881	153.165	0.0447	123.892	0.03424	139.625	0.03386
164.742	0.08892	126.2	0.07201	137.911	0.06811	148.049	0.0685	145.63	0.06151	144.688	0.05429	145.711	0.04873	152.795	0.04464	123.419	0.03416	139.237	0.0338
165.708	0.08935	125.795	0.0719	137.65	0.06796	147.662	0.06837	145.248	0.0614	144.271	0.05419	145.425	0.04864	152.411	0.04457	123.055	0.03408	138.953	0.03374
166.597	0.08975	125.323	0.07176	137.279	0.06784	147.287	0.06826	144.851	0.06128	143.942	0.05407	145.026	0.04856	152.005	0.0445	122.613	0.034	138.574	0.03368
167.363	0.09013	124.933	0.07159	136.889	0.06769	146.919	0.06812	144.488	0.06116	143.507	0.05396	144.632	0.04847	151.596	0.04443	122.169	0.03393	138.211	0.03362
167.987	0.09049	124.501	0.07143	136.571	0.06751	146.561	0.06798	144.115	0.06105	143.14	0.05386	144.343	0.04839	151.22	0.04435	121.749	0.03385	137.878	0.03356
168.696	0.09081	124.08	0.07127	136.175	0.06736	146.166	0.06786	143.738	0.06093	142.786	0.05375	143.941	0.0483	150.783	0.04427	121.3	0.03378	137.533	0.0335
169.395	0.09114	123.615	0.07112	135.804	0.06722	145.833	0.06772	143.353	0.06082	142.394	0.05363	143.562	0.04823	150.43	0.04419	120.879	0.03372	137.205	0.03345
169.922	0.09144	123.186	0.07097	135.448	0.06707	145.447	0.06761	142.95	0.06072	142.038	0.05353	143.211	0.04815	150.04	0.0441	120.435	0.03366	136.823	0.0334
170.768	0.09172	122.74	0.07082	135.083	0.06696	145.107	0.0675	142.577	0.06061	141.674	0.05341	142.857	0.04807	149.69	0.04402	119.983	0.03361	136.448	0.03335
171.53	0.09201	122.3	0.07069	134.747	0.06687	144.739	0.06737	142.204	0.0605	141.231	0.0533	142.466	0.048	149.297	0.04394	119.636	0.03355	136.096	0.03329
172.234	0.09231	121.834	0.07056	134.359	0.06682	144.353	0.06724	141.793	0.06039	140.884	0.05319	142.117	0.04792	148.957	0.04386	119.264	0.0335	135.75	0.03324
173.071	0.09263	121.409	0.07046	133.989	0.06671	143.935	0.06712	141.415	0.06028	140.507	0.05308	141.761	0.04784	148.605	0.04378	118.853	0.03343	135.358	0.03318
173.889	0.09297	120.964	0.07033	133.619	0.06663	143.573	0.06702	141.021	0.06016	140.113	0.05297	141.353	0.04775	148.196	0.04371	118.477	0.03337	135.033	0.03312
174.776	0.09333	120.467	0.07019	133.268	0.0665	143.153	0.06689	140.627	0.06004	139.77	0.05286	140.994	0.04766	147.841	0.04363	118.105	0.0333	134.668	0.03306
175.609	0.09372	120.017	0.07006	132.883	0.06636	142.817	0.06677	140.242	0.05992	139.42	0.05277	140.611	0.04757	147.55	0.04355	117.69	0.03323	134.308	0.03299
176.611	0.09413	119.637	0.06993	132.501	0.06625	142.418	0.06665	139.845	0.0598	139.071	0.05269	140.235	0.04748	147.158	0.04347	117.295	0.03316	133.917	0.03293
177.535	0.09458	119.252	0.0698	132.144	0.06614	141.965	0.06653	139.501	0.05968	138.713	0.05259	139.896	0.04739	146.849	0.04339	116.916	0.0331	133.556	0.03287
178.453	0.09502	118.865	0.06966	131.75	0.066	141.677	0.0664	139.17	0.05957	138.349	0.05251	139.515	0.0473	146.432	0.04331	116.544	0.03303	133.199	0.03281
179.346	0.09544	118.434	0.06951	131.362	0.06586	141.24	0.06626	138.807	0.05946	138.053	0.05241	139.226	0.04721	146.089	0.04324	116.136	0.03296	132.84	0.03275
180.284	0.09587	118.08	0.06937	131.017	0.06575	140.858	0.06613	138.468	0.05934	137.679	0.05231	138.884	0.04712	145.702	0.04316	115.743	0.03289	132.428	0.03269
181.25	0.0963	117.639	0.06925	130.606	0.06564	140.462	0.066	138.131	0.05923	137.326	0.05221	138.531	0.04704	145.321	0.04309	115.354	0.03282	132.075	0.03263
182.193	0.09671	117.238	0.06912	130.225	0.06549	140.106	0.06586	137.788	0.05911	137.008	0.0521	138.221	0.04696	144.987	0.04302	114.905	0.03275	131.696	0.03257
183.054	0.0971	116.818	0.069	129.901	0.06538	139.77	0.06574	137.421	0.05898	136.643	0.052	137.846	0.04687	144.575	0.04295	114.481	0.03268	131.359	0.03251
183.92	0.09747	116.435	0.06889	129.55	0.06526	139.417	0.0656	137.062	0.05886	136.285	0.0519	137.549	0.0468	144.266	0.04288	114.119	0.03262	130.956	0.03246
184.708	0.09784	116.022	0.06878	129.192	0.06517	139.072	0.0655	136.721	0.05874	135.934	0.0518	137.205	0.04672	143.886	0.0428	113.693	0.03256	130.576	0.0324
185.526	0.09818	115.588	0.06867	128.91	0.06506	138.707	0.06537	136.352	0.05863	135.612	0.05169	136.834	0.04665	143.479	0.04272	113.284	0.0325	130.159	0.03234
186.24	0.09853	115.175	0.06855	128.537	0.06496	138.395	0.06526	135.994	0.05852	135.191	0.05157	136.515	0.04658	143.129	0.04264	112.876	0.03243	129.836	0.03228
186.991	0.09885	114.763	0.06843	128.226	0.06484	137.999	0.06514	135.642	0.05842	134.82	0.05145	136.165	0.04651	142.823	0.04255	112.448	0.03237	129.515	0.03222
187.741	0.0992	114.325	0.06828	127.869	0.06473	137.668	0.06501	135.284	0.05832	134.516	0.05133	135.823	0.04644	142.404	0.04247	112.064	0.03229	129.158	0.03216
188.395	0.09957	113.916	0.06816	127.527	0.06463	137.295	0.06489	134.932	0.05821	134.145	0.05123	135.46	0.04637	141.988	0.04238	111.659	0.03222	128.815	0.0321
189.231	0.09994	113.469	0.06803	127.176	0.06447	136.934	0.06476	134.555	0.05811	133.786	0.05114	135.113	0.04629	141.668	0.0423	111.181	0.03215	128.498	0.03205
189.941	0.1003	113.079	0.0679	126.786	0.06434	136.609	0.06461	134.207	0.058	133.418	0.05106	134.76	0.04621	141.233	0.04222	110.788	0.03207	128.168	0.032
190.87	0.1007	112.632	0.06778	126.519	0.06422	136.206	0.06448	133.84	0.05788	133.082	0.051	134.424	0.04613	140.802	0.04215	110.342	0.03201	127.796	0.03194
191.764	0.10109	112.15	0.06765	126.151	0.06412	135.866	0.06434	133.448	0.05775	132.701	0.05093	134.101	0.04604	140.529	0.04208	109.935	0.03194	127.471	0.03189
192.697	0.1015	111.755	0.06751	125.798	0.06402	135.516	0.06422	133.096	0.05762	132.337	0.05086	133.698	0.04595	140.118	0.042	109.598	0.03189	127.158	0.03184
193.642	0.10188	111.299	0.06737	125.42	0.0639	135.18	0.0641	132.709	0.05749	131.958	0.05079	133.333	0.04585	139.729	0.04193	109.215	0.03183	126.786	0.03179
194.447	0.10227	110.873	0.06724	125.11	0.0638	134.772	0.064	132.339	0.05736	131.61	0.0507	133.006	0.04576	139.429	0.04185	108.795	0.03177	126.469	0.03173
195.438	0.10265	110.391	0.06713	124.691	0.06371	134.408	0.06389	132.006	0.05722	131.221	0.05059	132.614	0.04567	139.071	0.04176	108.439	0.03171	126.086	0.03168
196.277	0.10307	109.992	0.06701	124.345	0.06363	134.105	0.06379	131.618	0.0571	130.804	0.05047	132.285	0.04559	138.759	0.04168	108.085	0.03165	125.753	0.03162
197.185	0.10349	109.632	0.06691	124.031	0.06353	133.72	0.0637	131.196	0.05697	130.473	0.05036	131.924	0.04552	138.365	0.0416	107.728	0.03159	125.387	0.03156
198.04	0.10392	109.227	0.0668	123.658	0.06339	133.321	0.0636	130.865	0.05685	130.1	0.05025	131.552	0.04545	138.019	0.04152	107.304	0.03153	125.035	0.03151
198.895	0.10433	108.859	0.06669	123.34	0.06326	132.994	0.06346	130.465	0.05674	129.763	0.05015	131.189	0.04539	137.663	0.04144	106.958	0.03148	124.687	0.03145
199.656	0.10477	108.475	0.06658	122.92	0.06314	132.618	0.06334	130.081	0.05663	129.449	0.05005	130.799	0.04533	137.349	0.04136	106.556	0.03142	124.353	0.03139
200.533	0.10519	108.079	0.06647	122.614	0.063	132.193	0.06322	129.745	0.05652	129.073	0.04996	130.483	0.04528	136.95	0.04129	106.213	0.03137	124.004	0.03134
201.375	0.10563	107.711	0.06635	122.252	0.06287	131.852	0.06308	129.442	0.05641	128.795	0.04988	130.095	0.04524	136.656	0.04122	105.812	0.03131	123.632	0.03129
202.177	0.106	107.306	0.06623	121.862	0.06274	131.469	0.06294	129.122	0.05631	128.442	0.0498	129.805	0.04518	136.29	0.04114	105.418	0.03126	123.282	0.03123
203.076	0.10639	106.935	0.06613	121.51	0.06263	131.104	0.06279	128.76	0.05621	128.123	0.04971	129.46	0.04512	135.919	0.04107	105.036	0.03121	122.933	0.03118
203.782	0.10675	106.506	0.06603	121.177	0.06252	130.693	0.06268	128.427	0.0561	127.801	0.0496	129.141	0.04506	135.589	0.041	104.639	0.03116	122.558	0.03113
204.629	0.10711	106.122	0.06591	120.755	0.06241	130.308	0.06258	128.082	0.056	127.422	0.04948	128.811	0.04498	135.216	0.04093	104.245	0.03111	122.193	0.03108
205.481	0.1075	105.769	0.06579	120.401	0.06231	129.98	0.06247	127.765	0.05589	127.102	0.04938	128.512	0.04491	134.872	0.04086	103.844	0.03105	121.832	0.03103
206.274	0.10788	105.341	0.06566	120.005	0.06222	129.62	0.06234	127.418	0.05578	126.792	0.04926	128.183	0.04483	134.539	0.04079	103.451	0.031	121.491	0.03098
207.15	0.10826	104.883	0.06555	119.68	0.06215	129.298	0.0622	127.084	0.05566	126.432	0.04917	127.872	0.04475	134.157	0.04073	103.06	0.03095	121.096	0.03093
208.024	0.10869	104.473	0.06543	119.352	0.06208	128.977	0.06209	126.744	0.05555	126.11	0.04908	127.526	0.04466	133.792	0.04066	102.689	0.0309	120.724	0.03088
208.814	0.10914	104.076	0.06531	119.061	0.06201	128.646	0.06197	126.381	0.05544	125.766	0.04899	127.213	0.04459	133.42	0.04059	102.266	0.03084	120.375	0.03083
209.613	0.1096	103.689	0.06519	118.713	0.06193	128.332	0.06183	126.034	0.05533	125.412	0.0489	126.844	0.04451	133.058	0.04051	101.874	0.03079	119.979	0.03078
210.637	0.11004	103.269	0.06509	118.377	0.06184	127.934	0.06169	125.701	0.05522	125.056	0.04881	126.546	0.04443	132.751	0.04044	101.422	0.03073	119.677	0.03073
211.496	0.11048	102.876	0.06498	118.06	0.06174	127.64	0.06157	125.351	0.05512	124.741	0.04871	126.18	0.04436	132.343	0.04036	101.047	0.03067	119.36	0.03069
212.369	0.11088	102.457	0.06488	117.738	0.06164	127.258	0.06146	125.002	0.05502	124.354	0.04861	125.854	0.0443	132.034	0.04028	100.648	0.03061	119.071	0.03064
213.244	0.11126	102.01	0.06476	117.427	0.06151	126.934	0.06133	124.644	0.05492	123.99	0.04853	125.545	0.04423	131.654	0.04021	100.227	0.03056	118.7	0.0306
214.06	0.11167	101.561	0.06465	117.133	0.06137	126.59	0.0612	124.282	0.05482	123.655	0.04845	125.173	0.04417	131.263	0.04014	99.8361	0.0305	118.406	0.03055
214.897	0.11204	101.167	0.06454	116.746	0.06125	126.23	0.06106	123.942	0.05472	123.309	0.04837	124.847	0.04411	130.942	0.04007	99.4669	0.03044	118.028	0.03051
215.612	0.1124	100.722	0.06445	116.363	0.06113	125.895	0.06094	123.611	0.05462	122.94	0.04828	124.543	0.04405	130.508	0.04	99.1271	0.03038	117.734	0.03046
216.419	0.11282	100.268	0.06434	116.065	0.061	125.56	0.06084	123.211	0.05451	122.636	0.0482	124.166	0.04398	130.149	0.03994	98.7356	0.03033	117.392	0.03042
217.18	0.11323	99.8943	0.06423	115.675	0.06089	125.198	0.06075	122.86	0.05441	122.228	0.04811	123.825	0.04391	129.794	0.03987	98.3806	0.03027	117.065	0.03037
218.007	0.11364	99.5127	0.06413	115.395	0.0608	124.829	0.06066	122.512	0.0543	121.889	0.04802	123.445	0.04384	129.508	0.03981	97.9892	0.03022	116.746	0.03032
218.84	0.11408	99.113	0.06404	115.066	0.0607	124.471	0.06057	122.155	0.0542	121.527	0.04793	123.16	0.04376	129.193	0.03974	97.6269	0.03016	116.391	0.03027
219.8	0.1145	98.6895	0.06393	114.698	0.06061	124.18	0.06049	121.814	0.0541	121.171	0.04783	122.798	0.04368	128.861	0.03968	97.2386	0.0301	116.087	0.03023
220.68	0.11489	98.3228	0.06382	114.355	0.06052	123.791	0.0604	121.425	0.054	120.8	0.04773	122.429	0.0436	128.53	0.03961	96.8262	0.03005	115.761	0.03018
221.659	0.11526	97.8936	0.0637	113.973	0.06042	123.475	0.06031	121.09	0.0539	120.445	0.04765	122.067	0.04352	128.192	0.03954	96.4939	0.03	115.372	0.03014
222.528	0.11568	97.5328	0.0636	113.661	0.0603	123.104	0.06021	120.708	0.0538	120.044	0.04756	121.735	0.04345	127.889	0.03947	96.0965	0.02995	115.036	0.0301
223.323	0.11605	97.148	0.0635	113.324	0.0602	122.715	0.0601	120.319	0.05371	119.73	0.04747	121.394	0.04338	127.563	0.03939	95.713	0.02991	114.699	0.03006
224.138	0.1164	96.7301	0.0634	112.98	0.06011	122.353	0.05999	119.958	0.05361	119.444	0.04738	121.039	0.04331	127.219	0.03932	95.3493	0.02988	114.348	0.03002
224.95	0.11681	96.3314	0.0633	112.612	0.06001	121.989	0.05987	119.655	0.05352	119.139	0.04728	120.692	0.04324	126.849	0.03925	94.9132	0.02986	114.009	0.02998
225.71	0.11722	95.9261	0.06319	112.305	0.0599	121.645	0.05975	119.318	0.05344	118.79	0.0472	120.3	0.04317	126.54	0.03918	94.5502	0.02984	113.663	0.02994
226.528	0.11766	95.4789	0.06309	111.892	0.05981	121.261	0.05963	118.993	0.05335	118.478	0.04713	119.967	0.04311	126.177	0.03911	94.2204	0.02982	113.29	0.0299
227.367	0.11813	95.1149	0.06299	111.529	0.0597	120.869	0.05951	118.68	0.05326	118.206	0.04706	119.629	0.04304	125.835	0.03905	93.8074	0.02979	112.992	0.02986
228.091	0.11855	94.7329	0.06288	111.16	0.0596	120.545	0.05941	118.332	0.05317	117.85	0.04698	119.38	0.04298	125.526	0.03899	93.4884	0.02975	112.601	0.02982
228.996	0.11899	94.361	0.06277	110.84	0.05949	120.102	0.0593	118.025	0.05307	117.53	0.0469	119.026	0.04291	125.153	0.03892	93.0997	0.02971	112.294	0.02977
229.792	0.11946	94.0115	0.06267	110.43	0.05939	119.876	0.0592	117.686	0.05297	117.184	0.04682	118.74	0.04285	124.841	0.03886	92.7234	0.02965	111.888	0.02973
230.836	0.11992	93.6165	0.06257	110.118	0.05929	119.517	0.05909	117.388	0.05286	116.858	0.04673	118.408	0.04279	124.516	0.03879	92.3672	0.0296	111.549	0.02968
231.751	0.12035	93.1971	0.06247	109.777	0.05917	119.138	0.05899	117.058	0.05275	116.495	0.04663	118.094	0.04273	124.13	0.03872	91.9774	0.02954	111.167	0.02964
232.535	0.12077	92.8381	0.06238	109.437	0.05908	118.848	0.05888	116.718	0.05265	116.195	0.04652	117.784	0.04267	123.783	0.03864	91.5981	0.02949	110.797	0.02959
233.451	0.12122	92.4258	0.06229	109.169	0.05897	118.529	0.05877	116.391	0.05254	115.862	0.04641	117.505	0.04261	123.45	0.03857	91.2348	0.02944	110.453	0.02955
234.258	0.12167	92.0659	0.06219	108.846	0.05887	118.211	0.05866	116.048	0.05243	115.504	0.04632	117.132	0.04255	123.076	0.0385	90.8547	0.0294	110.088	0.02951
235.023	0.12208	91.6672	0.06209	108.523	0.05877	117.884	0.05855	115.714	0.05232	115.177	0.04623	116.82	0.04248	122.723	0.03844	90.4695	0.02936	109.927	0.02947
235.788	0.12248	91.2517	0.06199	108.245	0.05867	117.563	0.05845	115.378	0.05222	114.926	0.04615	116.474	0.04241	122.364	0.03838	90.0526	0.02932	109.482	0.02943
236.576	0.12285	90.8485	0.06188	107.875	0.05858	117.206	0.05835	115.007	0.05212	114.48	0.04607	116.198	0.04233	122.008	0.03832	89.7193	0.02929	109.144	0.02939
237.377	0.12325	90.4473	0.06177	107.6	0.05849	116.881	0.05825	114.675	0.05203	114.201	0.04599	115.853	0.04226	121.66	0.03827	89.3447	0.02926	108.835	0.02936
238.196	0.12364	90.0387	0.06168	107.27	0.05838	116.54	0.05814	114.332	0.05193	113.857	0.04591	115.546	0.04218	121.309	0.03822	89.022	0.02924	108.519	0.02932
239.091	0.12398	89.6772	0.06158	106.922	0.05829	116.222	0.05802	113.99	0.05184	113.516	0.04583	115.237	0.0421	120.994	0.03817	88.6533	0.02921	108.205	0.02929
239.937	0.12427	89.2689	0.06149	106.632	0.05818	115.913	0.05791	113.651	0.05175	113.15	0.04573	114.881	0.04203	120.604	0.03812	88.2775	0.02918	107.859	0.02926
240.42	0.12451	88.9218	0.06139	106.275	0.0581	115.55	0.0578	113.305	0.05165	112.85	0.04564	114.517	0.04196	120.174	0.03806	87.8957	0.02915	107.572	0.02922
240.787	0.12475	88.5237	0.0613	105.958	0.058	115.24	0.05768	112.957	0.05154	112.501	0.04555	114.195	0.04189	119.852	0.03801	87.5435	0.02911	107.247	0.02919
241.154	0.12496	88.1368	0.06121	105.643	0.05791	114.84	0.05755	112.616	0.05144	112.172	0.04546	113.888	0.04182	119.573	0.03795	87.1331	0.02907	106.896	0.02916
241.524	0.12517	87.75	0.06111	105.284	0.05783	114.529	0.05744	112.29	0.05133	111.79	0.04537	113.534	0.04175	119.244	0.03789	86.7567	0.02902	106.576	0.02912
241.908	0.12536	87.3697	0.06102	104.978	0.05775	114.162	0.05734	111.905	0.05124	111.416	0.0453	113.217	0.04168	118.951	0.03782	86.3828	0.02897	106.273	0.02909
242.547	0.12557	86.9836	0.06091	104.648	0.05766	113.802	0.05725	111.552	0.05115	111.135	0.04522	112.862	0.04162	118.632	0.03776	86.038	0.02892	105.925	0.02906
242.978	0.12581	86.5769	0.0608	104.311	0.05757	113.513	0.05715	111.191	0.05106	110.679	0.04514	112.534	0.04155	118.3	0.0377	85.6645	0.02886	105.61	0.02902
243.395	0.12607	86.1842	0.0607	104.013	0.05747	113.14	0.05705	110.975	0.05098	110.371	0.04506	112.181	0.04149	117.977	0.03764	85.2297	0.02881	105.292	0.02898
243.836	0.12635	85.7877	0.0606	103.659	0.05738	112.79	0.05695	110.463	0.0509	110.162	0.04495	111.857	0.04143	117.677	0.03758	84.8863	0.02876	104.935	0.02895
244.719	0.12665	85.351	0.0605	103.316	0.05728	112.455	0.05685	110.115	0.05081	109.798	0.04483	111.537	0.04137	117.349	0.03752	84.554	0.02872	104.575	0.02891
245.612	0.12702	84.9735	0.0604	102.969	0.05721	112.068	0.05675	109.804	0.05073	109.365	0.04472	111.157	0.04131	116.998	0.03746	84.1746	0.02869	104.273	0.02888
246.514	0.12747	84.6001	0.06031	102.644	0.05713	111.697	0.05665	109.498	0.05065	109.007	0.04459	110.801	0.04124	116.712	0.0374	83.8097	0.02866	103.926	0.02884
247.479	0.12796	84.2055	0.06022	102.313	0.05704	111.356	0.05655	109.176	0.05057	108.775	0.04447	110.481	0.04118	116.368	0.03734	83.5017	0.02864	103.586	0.0288
248.373	0.12853	83.8796	0.06012	101.911	0.05695	111.013	0.05645	108.867	0.05049	108.462	0.04437	110.075	0.04111	116.024	0.03728	83.1106	0.02862	103.222	0.02876
249.245	0.12908	83.464	0.06003	101.595	0.05687	110.628	0.05636	108.561	0.0504	108.156	0.04428	109.807	0.04104	115.712	0.03722	82.7627	0.02859	102.913	0.02872
250.164	0.12967	83.0991	0.05994	101.253	0.05679	110.333	0.05626	108.24	0.05032	107.844	0.04419	109.495	0.04098	115.391	0.03716	82.3588	0.02856	102.516	0.02867
251.13	0.13027	82.6916	0.05983	100.912	0.0567	109.997	0.05615	107.919	0.05023	107.558	0.04412	109.228	0.04091	115.046	0.03709	82.0024	0.02852	102.184	0.02862
252.102	0.13079	82.332	0.05974	100.579	0.05661	109.647	0.05605	107.617	0.05013	107.199	0.04404	108.909	0.04085	114.763	0.03703	81.6211	0.02847	101.795	0.02858
253.072	0.1313	81.9106	0.05963	100.212	0.05653	109.348	0.05596	107.274	0.05003	106.903	0.04396	108.598	0.04079	114.433	0.03696	81.2363	0.02842	101.487	0.02853
253.901	0.1318	81.5243	0.05952	99.8897	0.05644	109.042	0.05585	106.983	0.04993	106.604	0.04386	108.259	0.04073	114.036	0.03689	80.8697	0.02836	101.188	0.02849
254.788	0.13229	81.1015	0.05942	99.5888	0.05634	108.716	0.05575	106.651	0.04983	106.259	0.04378	107.957	0.04068	113.716	0.03682	80.4486	0.02832	100.824	0.02845
255.685	0.13278	80.7291	0.05932	99.2214	0.05624	108.428	0.05566	106.353	0.04974	105.946	0.04371	107.639	0.04062	113.414	0.03676	80.0598	0.02827	100.436	0.02841
256.608	0.1333	80.2816	0.05922	98.945	0.05614	108.12	0.05557	106.001	0.04964	105.634	0.04364	107.359	0.04056	113.034	0.03669	79.6952	0.02824	100.069	0.02837
257.475	0.1338	79.8898	0.05913	98.6329	0.05603	107.792	0.05547	105.684	0.04955	105.287	0.04359	107.028	0.0405	112.663	0.03664	79.352	0.02821	99.7662	0.02833
258.243	0.13427	79.5162	0.05903	98.3418	0.05595	107.451	0.05538	105.355	0.04947	104.975	0.04354	106.739	0.04044	112.377	0.03659	79.0196	0.02818	99.4574	0.0283
259.107	0.13472	79.1279	0.05894	97.9926	0.05588	107.155	0.05528	105.038	0.04938	104.656	0.04349	106.429	0.04038	111.97	0.03654	78.6453	0.02816	99.1463	0.02826
259.948	0.13518	78.7577	0.05884	97.6774	0.05582	106.822	0.0552	104.726	0.0493	104.312	0.04345	106.116	0.04031	111.667	0.0365	78.2887	0.02812	98.8739	0.02822
260.667	0.13553	78.4193	0.05875	97.3563	0.05575	106.513	0.05511	104.391	0.04922	104.022	0.04338	105.78	0.04024	111.312	0.03646	77.8955	0.02809	98.6274	0.02819
261.635	0.1359	77.9796	0.05864	97.0504	0.05569	106.17	0.05502	104.073	0.04913	103.654	0.04331	105.473	0.04017	110.943	0.03641	77.5261	0.02806	98.0919	0.02815
262.38	0.13634	77.6362	0.05853	96.705	0.05561	105.872	0.05492	103.728	0.04905	103.356	0.04322	105.144	0.04011	110.587	0.03637	77.1598	0.02803	97.8403	0.02811
263.281	0.13672	77.2257	0.05844	96.3777	0.05551	105.509	0.05483	103.406	0.04897	103.001	0.04314	104.783	0.04004	110.24	0.03632	76.778	0.02799	97.5482	0.02808
264.017	0.13715	76.7943	0.05834	95.9793	0.05541	105.229	0.05473	103.045	0.0489	102.668	0.04306	104.486	0.03997	109.958	0.03627	76.4167	0.02796	97.2193	0.02805
264.888	0.13762	76.3911	0.05825	95.7342	0.05531	104.854	0.05464	102.726	0.04881	102.346	0.04298	104.142	0.0399	109.637	0.03621	76.0046	0.02792	96.886	0.02802
265.639	0.13804	75.9607	0.05816	95.3927	0.05522	104.539	0.05455	102.382	0.04873	102.014	0.0429	103.823	0.03983	109.305	0.03615	75.6176	0.02788	96.5765	0.02798
266.458	0.13848	75.5995	0.05807	95.0134	0.05514	104.213	0.05447	102.044	0.04865	101.675	0.04282	103.567	0.03976	109.036	0.0361	75.2506	0.02784	96.1988	0.02795
267.191	0.13894	75.1527	0.05799	94.7146	0.05507	103.854	0.05439	101.703	0.04857	101.328	0.04275	103.146	0.0397	108.685	0.03604	74.865	0.0278	95.8699	0.02792
268.028	0.13939	74.7736	0.0579	94.4315	0.055	103.555	0.05431	101.379	0.04849	100.956	0.04267	102.846	0.03963	108.409	0.03598	74.4845	0.02776	95.534	0.02788
268.816	0.13982	74.414	0.0578	94.1282	0.05492	103.2	0.05421	101.038	0.0484	100.64	0.04259	102.54	0.03958	108.062	0.03592	74.1501	0.02773	95.1927	0.02785
269.515	0.14026	74.0022	0.0577	93.8075	0.05484	102.895	0.05411	100.688	0.04832	100.305	0.04252	102.234	0.03952	107.785	0.03586	73.7608	0.0277	94.8887	0.02781
270.306	0.14072	73.6244	0.0576	93.4741	0.05475	102.563	0.05402	100.34	0.04823	99.9374	0.04245	101.829	0.03946	107.491	0.0358	73.4336	0.02767	94.5504	0.02778
271.05	0.14114	73.2216	0.0575	93.1611	0.05466	102.201	0.05392	99.9937	0.04815	99.6563	0.04238	101.524	0.0394	107.167	0.03574	73.0226	0.02764	94.2637	0.02774
271.775	0.14158	72.8255	0.05741	92.8656	0.05457	101.864	0.05382	99.6849	0.04806	99.3391	0.0423	101.198	0.03934	106.853	0.03568	72.6795	0.02761	93.9433	0.0277
272.605	0.14201	72.431	0.05733	92.5419	0.05449	101.499	0.05373	99.3667	0.04798	99.0194	0.04223	100.827	0.03927	106.545	0.03562	72.2816	0.02757	93.6387	0.02767
273.389	0.14248	72.0123	0.05724	92.2153	0.05439	101.169	0.05364	99.0544	0.0479	98.6853	0.04217	100.487	0.03921	106.211	0.03557	71.9046	0.02753	93.3191	0.02764
274.223	0.14298	71.6085	0.05716	91.8967	0.05431	100.835	0.05358	98.7443	0.04781	98.3839	0.04209	100.136	0.03915	105.894	0.03551	71.4962	0.02749	93.0045	0.02761
274.864	0.14348	71.1924	0.05707	91.5255	0.05423	100.473	0.0535	98.45	0.04773	98.0814	0.04201	99.8655	0.03909	105.578	0.03546	71.1269	0.02744	92.6572	0.02758
275.599	0.14397	70.7536	0.05697	91.2424	0.05415	100.124	0.05342	98.1348	0.04765	97.7612	0.04193	99.5553	0.03903	105.281	0.0354	70.7072	0.0274	92.3724	0.02755
276.306	0.14449	70.3646	0.05686	90.9098	0.05406	99.7702	0.05334	97.8234	0.04756	97.444	0.04185	99.2162	0.03897	104.927	0.03535	70.2966	0.02736	92.0045	0.02752
276.988	0.14497	69.9437	0.05674	90.5755	0.05398	99.4596	0.05325	97.4963	0.04748	97.1082	0.04178	98.9324	0.03891	104.641	0.0353	69.932	0.02732	91.7161	0.02748
277.84	0.14542	69.5558	0.05663	90.2258	0.0539	99.1919	0.05317	97.1594	0.04739	96.7789	0.04171	98.619	0.03884	104.293	0.03525	69.5724	0.02728	91.4132	0.02744
278.695	0.14585	69.1653	0.05651	89.9259	0.05382	98.8517	0.05307	96.8357	0.0473	96.5038	0.04164	98.2984	0.03878	103.96	0.0352	69.2071	0.02725	91.0518	0.0274
279.358	0.14627	68.7823	0.05642	89.6536	0.05375	98.5356	0.05297	96.5304	0.04721	96.176	0.04158	97.9967	0.03872	103.665	0.03516	68.8248	0.02722	90.7498	0.02737
279.869	0.14671	68.3459	0.05632	89.3234	0.05369	98.2363	0.05287	96.205	0.04712	95.8199	0.04151	97.6898	0.03866	103.315	0.03511	68.4431	0.02718	90.3931	0.02733
280.452	0.14723	67.9831	0.05623	89.02	0.05361	97.8893	0.05278	95.8869	0.04704	95.5537	0.04145	97.3962	0.03861	102.981	0.03506	68.0546	0.02716	90.0746	0.02731
281.12	0.14778	67.5563	0.05613	88.6851	0.05355	97.6024	0.05271	95.5484	0.04695	95.2045	0.04137	97.0251	0.03856	102.629	0.03502	67.6849	0.02713	89.7685	0.02729
282.159	0.14831	67.1318	0.05601	88.3922	0.05346	97.268	0.05263	95.2295	0.04687	94.91	0.04129	96.7379	0.03852	102.354	0.03497	67.2893	0.0271	89.4446	0.02727
282.903	0.14889	66.6886	0.0559	88.0813	0.05338	96.9484	0.05257	94.8885	0.04679	94.5915	0.04121	96.3929	0.03847	102.001	0.03492	66.9031	0.02707	89.1359	0.02726
283.635	0.14945	66.2676	0.0558	87.7883	0.05331	96.6219	0.05249	94.5971	0.0467	94.2908	0.04114	96.0759	0.03843	101.667	0.03487	66.4917	0.02704	88.8041	0.02724
284.344	0.15002	65.8305	0.05569	87.4413	0.05324	96.2905	0.05243	94.2849	0.04662	93.9646	0.04107	95.7895	0.03838	101.328	0.03482	66.0975	0.027	88.5154	0.02722
284.963	0.15057	65.3807	0.0556	87.1109	0.05317	95.9718	0.05235	93.9987	0.04655	93.6641	0.041	95.4452	0.03833	100.979	0.03476	65.6824	0.02697	88.2124	0.0272
285.573	0.15108	64.9409	0.05551	86.8065	0.05309	95.6384	0.05226	93.6739	0.04647	93.3478	0.04093	95.1029	0.03827	100.733	0.03471	65.2525	0.02693	87.8769	0.02717
286.29	0.15157	64.548	0.05542	86.4812	0.05302	95.2948	0.05217	93.3573	0.04639	93.0502	0.04087	94.7841	0.03822	100.295	0.03466	64.8615	0.02689	87.537	0.02714
286.859	0.15208	64.1233	0.05531	86.1448	0.05294	95.0169	0.05207	93.0509	0.04632	92.7601	0.0408	94.5063	0.03815	99.9593	0.0346	64.48	0.02685	87.2511	0.02711
287.782	0.15266	63.7489	0.05521	85.8485	0.05287	94.7058	0.05199	92.7516	0.04625	92.4473	0.04074	94.2136	0.03809	99.6281	0.03454	64.1295	0.02681	86.9263	0.02708
288.459	0.1532	63.3086	0.05511	85.5081	0.05281	94.4155	0.0519	92.4236	0.04618	92.1143	0.04068	93.8848	0.03803	99.3634	0.03449	63.7382	0.02677	86.5708	0.02705
289.226	0.15373	62.8774	0.05499	85.1441	0.05275	94.0844	0.05183	92.1096	0.04611	91.8196	0.04062	93.5808	0.03797	99.0457	0.03443	63.3487	0.02674	86.2445	0.02702
289.985	0.15424	62.4942	0.05489	84.8584	0.0527	93.7809	0.05174	91.7955	0.04604	91.48	0.04056	93.2931	0.0379	98.7498	0.03437	62.9096	0.0267	85.9411	0.027
290.653	0.15473	62.0314	0.05478	84.5204	0.05264	93.4718	0.05166	91.4719	0.04597	91.1587	0.04049	93.0032	0.03784	98.4165	0.03432	62.5171	0.02667	85.6278	0.02697
291.222	0.15521	61.5728	0.05469	84.2318	0.05258	93.1217	0.05159	91.1666	0.0459	90.8641	0.04043	92.6664	0.03778	98.1225	0.03427	62.1285	0.02664	85.2601	0.02695
291.979	0.15565	61.1321	0.0546	83.9182	0.05252	92.8412	0.05152	90.8447	0.04583	90.5169	0.04037	92.3542	0.03772	97.837	0.03422	61.7181	0.02662	84.959	0.02692
292.599	0.15605	60.6725	0.05451	83.6205	0.05245	92.5131	0.05145	90.5147	0.04576	90.1853	0.04032	92.0675	0.03767	97.4678	0.03418	61.2779	0.0266	84.6342	0.02689
293.168	0.15642	60.2045	0.05441	83.3025	0.05238	92.2175	0.05139	90.1857	0.04569	89.8994	0.04025	91.7175	0.03762	97.1745	0.03414	60.8593	0.02658	84.3335	0.02685
293.828	0.15685	59.7861	0.0543	82.9841	0.0523	91.8831	0.05134	89.8836	0.04561	89.6077	0.0402	91.4224	0.03756	96.8707	0.03409	60.4178	0.02655	84.0377	0.02682
294.595	0.15729	59.3449	0.0542	82.6369	0.05222	91.5782	0.05128	89.579	0.04553	89.264	0.04014	91.0981	0.03751	96.5767	0.03405	59.9723	0.02653	83.7105	0.02679
295.353	0.1577	58.9166	0.05409	82.3122	0.05215	91.2722	0.05123	89.294	0.04545	89.0005	0.04008	90.8037	0.03746	96.2316	0.034	59.6037	0.0265	83.4053	0.02676
295.823	0.15811	58.4691	0.05399	82.0073	0.05207	90.9185	0.05116	88.9925	0.04537	88.7105	0.04002	90.4822	0.0374	95.9195	0.03395	59.1997	0.02647	83.0637	0.02674
296.343	0.15851	58.0579	0.05388	81.7126	0.052	90.5771	0.05108	88.6728	0.04529	88.4331	0.03995	90.1479	0.03735	95.6091	0.03389	58.8036	0.02645	82.77	0.02671
296.821	0.15891	57.5817	0.05377	81.3982	0.05193	90.2514	0.05099	88.3595	0.04521	88.1023	0.03987	89.8735	0.0373	95.3261	0.03383	58.3799	0.02642	82.4516	0.02667
297.58	0.15924	57.1283	0.05366	81.0173	0.05186	89.9402	0.05091	88.0564	0.04513	87.8041	0.03981	89.5647	0.03726	94.9779	0.03377	57.9702	0.02639	82.148	0.02664
298.248	0.1595	56.6473	0.05357	80.7051	0.05177	89.6219	0.05083	87.76	0.04504	87.4813	0.03974	89.291	0.03722	94.6727	0.03372	57.5638	0.02637	81.784	0.0266
298.668	0.15972	56.2	0.05348	80.3886	0.05169	89.3683	0.05075	87.4499	0.04496	87.1216	0.03968	88.9939	0.03719	94.3685	0.03366	57.1237	0.02634	81.4848	0.02656
299.237	0.1599	55.6818	0.05338	80.0317	0.0516	89.0333	0.05066	87.1272	0.04487	86.8606	0.03962	88.6862	0.03715	94.0981	0.0336	56.6735	0.02631	81.1505	0.02651
299.576	0.16004	55.1902	0.05327	79.7102	0.05154	88.709	0.05058	86.7993	0.04478	86.5449	0.03957	88.3833	0.03711	93.7764	0.03355	56.2146	0.02628	80.8365	0.02647
300.046	0.16013	54.7309	0.05317	79.4257	0.05146	88.4298	0.05049	86.4862	0.04469	86.2301	0.03951	88.0798	0.03707	93.4934	0.0335	55.7613	0.02624	80.5052	0.02643
300.375	0.16017	54.2766	0.05308	79.1105	0.05138	88.1181	0.0504	86.1873	0.0446	85.8891	0.03945	87.7833	0.03702	93.1668	0.03345	55.2877	0.02621	80.1671	0.0264
--	--	53.8028	0.05297	78.8066	0.05132	87.7978	0.05031	85.8581	0.04452	85.587	0.0394	87.4601	0.03697	92.866	0.0334	54.8426	0.02618	79.8274	0.02637
--	--	53.3338	0.05287	78.5185	0.05125	87.4982	0.05022	85.5402	0.04444	85.2408	0.03937	87.1836	0.03692	92.5727	0.03336	54.4157	0.02615	79.5543	0.02635
--	--	52.8897	0.05277	78.1944	0.05119	87.1788	0.05013	85.2274	0.04437	84.9539	0.03933	86.8579	0.03687	92.2647	0.03331	53.996	0.02613	79.2693	0.02632
--	--	52.3724	0.05265	77.8603	0.0511	86.8567	0.05005	84.8958	0.0443	84.6195	0.03932	86.5567	0.03682	91.9493	0.03328	53.5723	0.02612	78.9351	0.0263
--	--	51.8466	0.05254	77.529	0.05102	86.5326	0.04996	84.5967	0.04424	84.3842	0.03928	86.251	0.03677	91.6277	0.03324	53.1222	0.0261	78.6164	0.02628
--	--	51.3194	0.05244	77.2102	0.05095	86.2196	0.04988	84.3059	0.04417	84.0527	0.03924	85.9332	0.03672	91.326	0.0332	52.6434	0.02608	78.2973	0.02625
--	--	50.7989	0.05234	76.8964	0.05088	85.8802	0.0498	83.9956	0.04411	83.7425	0.0392	85.6075	0.03668	91.0077	0.03317	52.2132	0.02606	78.0037	0.02621
--	--	50.2753	0.05223	76.5922	0.05083	85.5662	0.04973	83.6999	0.04404	83.4823	0.03914	85.2653	0.03664	90.6972	0.03313	51.7268	0.02604	77.6813	0.02618
--	--	49.713	0.05213	76.2329	0.05077	85.2539	0.04966	83.3866	0.04397	83.1504	0.03906	84.9888	0.0366	90.3867	0.03308	51.2335	0.02601	77.3456	0.02614
--	--	49.2069	0.05204	75.9006	0.05072	84.9416	0.04958	83.0819	0.0439	82.8371	0.03899	84.6598	0.03657	90.0665	0.03303	50.7492	0.02598	77.0263	0.0261
--	--	48.6838	0.05194	75.5747	0.05066	84.6093	0.04951	82.7787	0.04382	82.5203	0.03893	84.3872	0.03653	89.7928	0.03299	50.2505	0.02596	76.7073	0.02606
--	--	48.1097	0.05184	75.2411	0.05059	84.3348	0.04944	82.4926	0.04374	82.2131	0.03889	84.0862	0.0365	89.5013	0.03294	49.766	0.02594	76.3459	0.02603
--	--	47.5985	0.05174	74.8887	0.05052	84.0288	0.04938	82.1627	0.04366	81.9029	0.03885	83.7878	0.03647	89.1959	0.0329	49.2596	0.02592	76.0231	0.026
--	--	47.0592	0.05162	74.5646	0.05043	83.714	0.0493	81.8399	0.04358	81.5994	0.0388	83.4862	0.03643	88.9138	0.03287	48.8023	0.0259	75.7167	0.02597
--	--	46.506	0.05151	74.2952	0.05034	83.4182	0.04922	81.5083	0.04349	81.3085	0.03876	83.2127	0.03638	88.618	0.03284	48.2809	0.02588	75.3722	0.02594
--	--	45.9286	0.0514	73.9616	0.05026	83.1011	0.04914	81.197	0.04341	80.9632	0.03872	82.9056	0.03633	88.3131	0.03282	47.7784	0.02586	75.0099	0.02591
--	--	45.3135	0.05129	73.6784	0.05019	82.7958	0.04907	80.8798	0.04332	80.6393	0.03869	82.6004	0.03628	87.9934	0.0328	47.3006	0.02584	74.7004	0.02589
--	--	44.7448	0.05118	73.3528	0.05013	82.5067	0.049	80.566	0.04324	80.3171	0.03866	82.2509	0.03622	87.703	0.03277	46.8	0.02581	74.3881	0.02587
--	--	44.1576	0.05107	73.0296	0.05007	82.1862	0.04896	80.2314	0.04317	79.9948	0.03862	81.9454	0.03617	87.3953	0.03275	46.2809	0.02578	74.0798	0.02585
--	--	43.5676	0.05098	72.6885	0.05	81.8512	0.0489	79.9254	0.0431	79.6949	0.03859	81.6483	0.03611	87.0883	0.03271	45.7385	0.02575	73.7727	0.02583
--	--	42.9539	0.05088	72.372	0.04993	81.525	0.04885	79.6222	0.04303	79.4171	0.03855	81.3364	0.03606	86.808	0.03267	45.1718	0.02573	73.4407	0.02581
--	--	42.291	0.05077	72.0159	0.04986	81.1991	0.04881	79.3109	0.04298	79.1375	0.0385	81.0226	0.03602	86.4583	0.03263	44.6518	0.02571	73.1282	0.02578
--	--	41.662	0.05067	71.7292	0.04978	80.9033	0.04876	79.0263	0.04292	78.8241	0.03845	80.7065	0.03597	86.1643	0.03258	44.1053	0.0257	72.8128	0.02576
--	--	41.041	0.05056	71.3806	0.04969	80.57	0.04868	78.7046	0.04286	78.5173	0.03839	80.3868	0.03592	85.8234	0.03254	43.5408	0.0257	72.4753	0.02573
--	--	40.3704	0.05045	71.0245	0.04962	80.261	0.04858	78.4062	0.04281	78.2325	0.03836	80.0557	0.03587	85.5157	0.03249	42.9552	0.02571	72.1593	0.0257
--	--	39.671	0.05035	70.7136	0.04954	79.9209	0.0485	78.1023	0.04275	77.8695	0.03833	79.7648	0.03582	85.2004	0.03245	42.3791	0.02571	71.8052	0.02568
--	--	38.9316	0.05024	70.343	0.04947	79.6242	0.04843	77.7938	0.04269	77.6115	0.03829	79.4303	0.03577	84.9024	0.03241	41.7856	0.02572	71.4728	0.02565
--	--	38.3053	0.05013	70.0048	0.0494	79.3372	0.04835	77.4649	0.04262	77.317	0.03825	79.1449	0.03572	84.6408	0.03237	41.2012	0.02572	71.1211	0.02563
--	--	37.5449	0.05003	69.6711	0.04933	79.018	0.04829	77.1458	0.04256	76.9748	0.0382	78.885	0.03567	84.3201	0.03233	40.6171	0.02572	70.7815	0.02561
--	--	36.7928	0.04993	69.3772	0.04926	78.687	0.04822	76.8437	0.04251	76.6176	0.03816	78.5734	0.03562	84.0055	0.03229	39.9922	0.02571	70.4308	0.02559
--	--	35.9711	0.04982	69.0628	0.04918	78.3958	0.04816	76.5208	0.04245	76.3476	0.03811	78.2713	0.03557	83.7255	0.03224	39.3183	0.0257	70.0993	0.02557
--	--	35.1975	0.04971	68.7543	0.04911	78.0957	0.04809	76.1954	0.04241	76.0093	0.03803	77.9507	0.03553	83.4182	0.0322	38.6838	0.0257	69.7864	0.02556
--	--	34.3668	0.0496	68.4082	0.04903	77.7673	0.04803	75.8512	0.04236	75.7133	0.03796	77.6186	0.03549	83.1431	0.03216	38.0348	0.0257	69.4383	0.02553
--	--	33.4751	0.04948	68.0729	0.04896	77.4613	0.04796	75.5193	0.04232	75.3488	0.03789	77.3271	0.03544	82.7919	0.03212	37.3495	0.0257	69.1324	0.02551
--	--	32.5228	0.04935	67.7296	0.04889	77.1365	0.04789	75.1921	0.04228	75.0181	0.03785	76.9982	0.0354	82.5124	0.03209	36.6242	0.02572	68.8147	0.02548
--	--	31.5787	0.04924	67.4191	0.04881	76.7965	0.04783	74.8704	0.04224	74.7318	0.03778	76.6784	0.03535	82.2088	0.03205	35.8678	0.02573	68.4812	0.02545
--	--	30.5704	0.04912	67.0498	0.04873	76.4949	0.04777	74.5696	0.04219	74.4449	0.03772	76.3636	0.0353	81.9122	0.03202	35.1556	0.02575	68.1539	0.02541
--	--	29.4862	0.049	66.6966	0.04867	76.1552	0.04769	74.2702	0.04215	74.1006	0.03768	76.0276	0.03525	81.6079	0.03199	34.4038	0.02577	67.83	0.02538
--	--	28.3635	0.04889	66.3715	0.0486	75.8393	0.0476	73.9593	0.0421	73.8328	0.03764	75.7289	0.0352	81.2927	0.03195	33.5836	0.02579	67.5014	0.02534
--	--	27.1232	0.04876	66.0321	0.04853	75.5294	0.04753	73.6649	0.04204	73.5263	0.03763	75.3848	0.03515	80.9552	0.03191	32.723	0.02581	67.1723	0.02531
--	--	25.8156	0.04865	65.6536	0.04845	75.1857	0.04743	73.346	0.04197	73.203	0.03761	75.0454	0.0351	80.6654	0.03187	31.8863	0.02584	66.7909	0.02529
--	--	24.3782	0.04852	65.3002	0.04838	74.8574	0.04735	73.0317	0.04191	72.8881	0.03759	74.7608	0.03506	80.3365	0.03183	30.9812	0.02587	66.4457	0.02526
--	--	24.3094	0.04843	64.9682	0.0483	74.5234	0.04728	72.7202	0.04185	72.5784	0.03757	74.424	0.03501	80.0134	0.03179	30.0599	0.02592	66.0935	0.02523
--	--	21.137	0.04835	64.626	0.04823	74.2359	0.04719	72.3955	0.0418	72.2793	0.03754	74.1532	0.03496	79.7275	0.03176	29.0733	0.02599	65.7805	0.02521
--	--	19.252	0.04832	64.3042	0.04815	73.9405	0.04713	72.0773	0.04175	71.9438	0.03751	73.8431	0.03492	79.4124	0.03174	27.9827	0.02606	65.3797	0.02518
--	--	17.1561	0.04833	63.971	0.04807	73.6109	0.04708	71.7493	0.04171	71.6346	0.03744	73.5282	0.03487	79.1256	0.03173	26.7721	0.02614	65.0174	0.02516
--	--	14.8396	0.0484	63.6328	0.048	73.2906	0.04701	71.4339	0.04167	71.2853	0.03739	73.2371	0.03483	78.8464	0.03173	25.8162	0.02627	64.7243	0.02514
--	--	12.2391	0.0485	63.2868	0.04794	72.9888	0.04692	71.0917	0.04164	70.9845	0.03734	72.9109	0.03479	78.5261	0.03173	24.5584	0.02643	64.3919	0.02512
--	--	9.6656	0.04868	62.9053	0.04788	72.6692	0.04685	70.7461	0.04161	70.646	0.03729	72.6042	0.03476	78.2196	0.03173	23.1789	0.02663	64.0359	0.02509
--	--	7.7274	0.04889	62.5978	0.0478	72.3705	0.04679	70.4043	0.04156	70.3021	0.03724	72.2974	0.03472	77.8953	0.03172	21.0839	0.02688	63.73	0.02507
--	--	6.0927	0.0491	62.2083	0.04773	72.0134	0.0467	70.0611	0.04151	69.9736	0.03722	71.9775	0.03469	77.6129	0.0317	18.9754	0.02716	63.3739	0.02504
--	--	4.9671	0.04929	61.8891	0.04766	71.7293	0.04662	69.7475	0.04147	69.6871	0.03721	71.6401	0.03466	77.3116	0.03167	17.2723	0.02748	63.0309	0.02502
--	--	4.33	0.04945	61.5205	0.04758	71.3652	0.04654	69.4392	0.04142	69.359	0.03722	71.2981	0.03462	76.9965	0.03162	15.4071	0.02781	62.6846	0.02499
--	--	3.9615	0.04955	61.1741	0.04751	71.0488	0.04645	69.143	0.04138	69.0393	0.03723	71.0008	0.03458	76.7117	0.03156	13.7717	0.02813	62.3222	0.02496
--	--	3.7246	0.04961	60.7927	0.04744	70.6662	0.04639	68.813	0.04133	68.7387	0.03722	70.6318	0.03453	76.3787	0.03151	12.366	0.02842	61.9636	0.02493
--	--	3.5339	0.04965	60.4021	0.04738	70.3641	0.04631	68.4972	0.04127	68.412	0.0372	70.3339	0.03448	76.0539	0.03146	11.1226	0.02868	61.6087	0.0249
--	--	3.3657	0.04967	59.9918	0.04731	70.0122	0.04624	68.1763	0.04121	68.1053	0.03718	69.9877	0.03443	75.754	0.03141	9.96017	0.0289	61.2589	0.02487
--	--	3.2183	0.04966	59.6686	0.04725	69.6851	0.04615	67.8378	0.04114	67.7655	0.03715	69.6866	0.03438	75.4038	0.03136	9.25734	0.02909	60.8773	0.02484
--	--	3.0928	0.04972	59.344	0.04719	69.4025	0.04607	67.5347	0.04107	67.4306	0.0371	69.3789	0.03433	75.0861	0.03132	8.4204	0.02924	60.5097	0.0248
--	--	2.9813	0.04974	58.9815	0.04713	69.0824	0.04599	67.1736	0.04099	67.1217	0.03703	69.0641	0.03429	74.809	0.03127	7.9479	0.02937	60.1092	0.02477
--	--	2.8966	0.04978	58.63	0.04707	68.7769	0.04591	66.8531	0.04092	66.7599	0.03697	68.7449	0.03425	74.5039	0.03123	7.6807	0.02948	59.7657	0.02475
--	--	2.8804	0.04981	58.325	0.047	68.4791	0.04583	66.5123	0.04086	66.4565	0.03693	68.4395	0.03421	74.215	0.03119	7.3407	0.02957	59.4304	0.02472
--	--	2.9359	0.0498	57.9183	0.04692	68.1199	0.04576	66.1764	0.0408	66.0968	0.03689	68.1091	0.03417	73.9217	0.03116	6.9649	0.02966	59.0927	0.0247
--	--	2.9574	0.04979	57.5486	0.04685	67.7804	0.04568	65.8113	0.04076	65.7357	0.03684	67.7861	0.03413	73.6256	0.03112	6.6527	0.02974	58.7344	0.02468
--	--	2.9311	0.04978	57.176	0.04678	67.465	0.0456	65.4671	0.04073	65.3863	0.0368	67.4864	0.03409	73.3102	0.03109	6.40533	0.02981	58.3849	0.02465
--	--	2.8518	0.0498	56.7879	0.04671	67.1	0.04554	65.1091	0.04069	65.0332	0.03675	67.1392	0.03405	73.0099	0.03106	6.12845	0.02987	58.0146	0.02463
--	--	2.7467	0.0498	56.4157	0.04663	66.7903	0.04548	64.7757	0.04067	64.7131	0.03672	66.8194	0.03401	72.6984	0.03103	5.9893	0.02993	57.6436	0.02461
--	--	2.6299	0.04978	55.9618	0.04655	66.4324	0.0454	64.4763	0.04064	64.4153	0.03669	66.4873	0.03397	72.3583	0.031	5.83453	0.02998	57.2847	0.02459
--	--	2.5201	0.04984	55.6119	0.04648	66.1088	0.04533	64.1519	0.0406	64.0873	0.03665	66.1411	0.03393	72.0355	0.03097	5.71099	0.03002	56.8926	0.02456
--	--	2.4089	0.04987	55.1987	0.04642	65.7181	0.04527	63.805	0.04054	63.7911	0.03661	65.8261	0.03389	71.7241	0.03093	5.58888	0.03006	56.4999	0.02454
--	--	2.3167	0.0499	54.7783	0.04633	65.359	0.04521	63.4922	0.04049	63.4322	0.03656	65.4656	0.03385	71.4204	0.03089	5.44973	0.0301	56.1012	0.02451
--	--	2.2214	0.04994	54.4413	0.04627	65.0011	0.04515	63.1645	0.04042	63.0778	0.03652	65.1188	0.0338	71.0965	0.03085	5.34324	0.03013	55.7048	0.02449
--	--	2.1458	0.04996	54.0684	0.0462	64.6935	0.04509	62.8277	0.04036	62.7675	0.03648	64.8121	0.03376	70.7528	0.03081	5.24526	0.03017	55.3044	0.02447
--	--	2.0734	0.04997	53.6771	0.04613	64.3871	0.04501	62.4839	0.04029	62.4196	0.03644	64.4861	0.03371	70.4295	0.03076	5.14729	0.03021	54.9111	0.02446
--	--	2	0.05001	53.3184	0.04606	64.0493	0.04494	62.1335	0.04022	62.0692	0.03638	64.1623	0.03367	70.1096	0.03072	5.03369	0.03025	54.5324	0.02444
--	--	1.9477	0.05005	52.9242	0.04599	63.7008	0.04487	61.7919	0.04016	61.7405	0.03633	63.8258	0.03363	69.7812	0.03069	4.95986	0.03029	54.1664	0.02442
--	--	1.8939	0.05005	52.5082	0.04592	63.3649	0.04479	61.4225	0.04011	61.4033	0.03628	63.5201	0.0336	69.511	0.03066	4.84484	0.03033	53.7885	0.0244
--	--	1.8406	0.05006	52.1058	0.04586	63.0413	0.04471	61.0638	0.04005	61.026	0.03626	63.2016	0.03357	69.2127	0.03063	4.70711	0.03037	53.4279	0.02438
--	--	1.7946	0.05009	51.6832	0.04579	62.6911	0.04463	60.6928	0.03999	60.6587	0.03622	62.8655	0.03355	68.8883	0.0306	4.55944	0.03041	53.0262	0.02436
--	--	1.7367	0.0501	51.2738	0.04572	62.3212	0.04457	60.3287	0.03993	60.2881	0.03621	62.5126	0.03354	68.5768	0.03058	4.45295	0.03045	52.6402	0.02433
--	--	1.7008	0.05009	50.8363	0.04564	61.9902	0.0445	59.9634	0.03986	59.9552	0.0362	62.191	0.03352	68.2603	0.03055	4.3276	0.03048	52.2314	0.02431
--	--	1.6892	0.0501	50.3905	0.04559	61.5979	0.04444	59.6248	0.03979	59.6112	0.03621	61.8476	0.03351	67.9547	0.03053	4.2729	0.03051	51.8106	0.02428
--	--	1.6823	0.05008	49.9444	0.04551	61.2517	0.04435	59.2869	0.03972	59.2641	0.03621	61.4954	0.03349	67.6197	0.0305	4.20872	0.03053	51.4006	0.02425
--	--	1.6762	0.05009	49.5591	0.04544	60.8679	0.04429	58.9523	0.03964	58.9196	0.03618	61.1474	0.03347	67.2945	0.03047	4.14341	0.03055	50.9573	0.02423
--	--	1.6712	0.05011	49.1138	0.04537	60.4775	0.04423	58.5823	0.03957	58.5646	0.03614	60.7688	0.03345	66.9892	0.03043	4.08519	0.03057	50.5308	0.0242
--	--	1.6657	0.05013	48.6822	0.0453	60.135	0.04416	58.2497	0.03951	58.2523	0.03611	60.4106	0.03343	66.655	0.03039	4.01987	0.0306	50.0869	0.02418
--	--	1.661	0.05014	48.2283	0.04523	59.7858	0.04412	57.898	0.03945	57.8681	0.03606	60.0243	0.0334	66.3348	0.03035	3.95456	0.03062	49.6572	0.02415
--	--	1.6562	0.05015	47.7924	0.04518	59.453	0.04405	57.5242	0.03938	57.5075	0.03602	59.696	0.03337	66.0061	0.03031	3.85658	0.03064	49.2398	0.02413
--	--	1.6508	0.05016	47.3672	0.04512	59.0956	0.04399	57.1646	0.03931	57.1286	0.03597	59.3887	0.03334	65.662	0.03028	3.79979	0.03067	48.8163	0.02412
--	--	1.6468	0.05018	46.9443	0.04506	58.7516	0.04392	56.7685	0.03924	56.7668	0.03594	59.0308	0.03331	65.3044	0.03024	3.69329	0.03069	48.385	0.0241
--	--	1.6452	0.05019	46.4657	0.045	58.3818	0.04384	56.3997	0.03916	56.3937	0.0359	58.7207	0.03327	64.9959	0.03022	3.59532	0.03072	47.9377	0.02409
--	--	--	--	45.9868	0.04494	58.0343	0.04376	56.0087	0.03908	56.0195	0.03586	58.366	0.03323	64.6676	0.03019	3.50586	0.03075	47.5163	0.02407
--	--	--	--	45.5331	0.04487	57.6757	0.04367	55.6269	0.03902	55.6322	0.03581	58.0173	0.03319	64.3434	0.03017	3.37523	0.03079	47.0594	0.02406
--	--	--	--	45.0558	0.04481	57.2896	0.04358	55.2148	0.03896	55.2246	0.03576	57.6753	0.03315	64.0535	0.03016	3.26874	0.03082	46.6294	0.02404
--	--	--	--	44.5763	0.04475	56.9251	0.04351	54.8449	0.03892	54.8536	0.03572	57.3113	0.03311	63.7141	0.03015	3.16224	0.03085	46.1955	0.02403
--	--	--	--	44.122	0.04468	56.5275	0.04342	54.4904	0.0389	54.5042	0.03568	56.9281	0.03307	63.402	0.03015	3.05575	0.03088	45.7084	0.02401
--	--	--	--	43.6327	0.04462	56.1511	0.04336	54.1243	0.03887	54.1401	0.03563	56.5529	0.03302	63.0524	0.03014	2.96629	0.03091	45.2214	0.02399
--	--	--	--	43.1283	0.04456	55.7622	0.04329	53.7534	0.03884	53.772	0.03559	56.1748	0.03298	62.7512	0.03012	2.84418	0.03094	44.7525	0.02398
--	--	--	--	42.6192	0.0445	55.3569	0.04322	53.3974	0.0388	53.4137	0.03554	55.7871	0.03294	62.4037	0.0301	2.77034	0.03097	44.2883	0.02396
--	--	--	--	42.0677	0.04443	54.953	0.04315	53.0157	0.03874	53.0387	0.0355	55.411	0.03289	62.0697	0.03008	2.65675	0.031	43.8401	0.02395
--	--	--	--	41.5746	0.04437	54.5889	0.04307	52.6115	0.03869	52.6384	0.03546	55.0132	0.03285	61.7271	0.03004	2.57954	0.03103	43.3581	0.02393
--	--	--	--	41.0719	0.04431	54.2366	0.043	52.2208	0.03864	52.2326	0.03542	54.6433	0.03281	61.396	0.03001	2.42515	0.03107	42.8286	0.02392
--	--	--	--	40.5384	0.04424	53.8453	0.04294	51.8191	0.03859	51.8365	0.03538	54.3114	0.03277	61.0249	0.02997	2.29928	0.0311	42.3006	0.0239
--	--	--	--	39.9621	0.04418	53.489	0.04288	51.4133	0.03856	51.4195	0.03534	53.947	0.03272	60.6756	0.02993	2.1825	0.03113	41.7949	0.02389
--	--	--	--	39.3961	0.04412	53.1	0.04282	50.9855	0.03854	51.0304	0.03532	53.5678	0.03268	60.3132	0.0299	2.04756	0.03117	41.2983	0.02388
--	--	--	--	38.8277	0.04405	52.7077	0.04276	50.5483	0.03853	50.599	0.03528	53.1852	0.03263	59.9642	0.02986	1.88309	0.03121	40.793	0.02387
--	--	--	--	38.2834	0.044	52.3139	0.04269	50.1152	0.03851	50.1634	0.03523	52.7821	0.03259	59.6406	0.02983	1.73239	0.03125	40.2562	0.02386
--	--	--	--	37.6978	0.04394	51.8969	0.04262	49.7137	0.03849	49.7539	0.03518	52.4316	0.03255	59.2816	0.02981	1.60175	0.03129	39.6925	0.02385
--	--	--	--	37.0773	0.04389	51.4863	0.04255	49.298	0.03845	49.34	0.03515	52.0044	0.03252	58.9851	0.02978	--	--	39.101	0.02384
--	--	--	--	36.4355	0.04384	51.0494	0.04247	48.8846	0.03841	48.9348	0.03511	51.6733	0.03249	58.6265	0.02975	--	--	38.5566	0.02384
--	--	--	--	35.7967	0.0438	50.6205	0.04239	48.4741	0.03835	48.5016	0.03508	51.1861	0.03246	58.2759	0.02973	--	--	38.0237	0.02384
--	--	--	--	35.1939	0.04377	50.1803	0.04233	48.0285	0.0383	48.0583	0.03504	50.7557	0.03242	57.9533	0.0297	--	--	37.4223	0.02384
--	--	--	--	34.5155	0.04374	49.7647	0.04227	47.6005	0.03825	47.6585	0.035	50.3256	0.03238	57.6051	0.02966	--	--	36.7993	0.02383
--	--	--	--	33.8222	0.0437	49.3164	0.04221	47.179	0.0382	47.255	0.03497	49.898	0.03235	57.2252	0.02963	--	--	36.1448	0.02383
--	--	--	--	33.0342	0.04366	48.9202	0.04214	46.7622	0.03815	46.836	0.03493	49.5129	0.03231	56.8786	0.0296	--	--	35.5422	0.02383
--	--	--	--	32.338	0.04361	48.4888	0.04208	46.3054	0.0381	46.3822	0.03488	49.0926	0.03227	56.514	0.02957	--	--	34.9232	0.02383
--	--	--	--	31.5549	0.04357	48.0307	0.042	45.8467	0.03805	45.9248	0.03481	48.6676	0.03224	56.1149	0.02954	--	--	34.2681	0.02384
--	--	--	--	30.7315	0.04354	47.6213	0.04194	45.3813	0.038	45.4561	0.03475	48.2391	0.03221	55.7753	0.0295	--	--	33.5664	0.02385
--	--	--	--	29.9105	0.04351	47.1817	0.04186	44.9133	0.03795	45.0184	0.0347	47.8167	0.03219	55.3627	0.02947	--	--	32.8236	0.02386
--	--	--	--	29.0127	0.04349	46.7397	0.0418	44.4734	0.03789	44.5614	0.03466	47.4007	0.03216	54.9877	0.02944	--	--	32.1204	0.02387
--	--	--	--	28.1018	0.04347	46.3163	0.04173	44.0115	0.03782	44.108	0.03462	47	0.03213	54.6235	0.02941	--	--	31.368	0.02389
--	--	--	--	27.1247	0.04346	46.0287	0.04167	43.5393	0.03775	43.6353	0.03457	46.5527	0.03209	54.315	0.02938	--	--	30.5721	0.02392
--	--	--	--	26.0897	0.04347	45.4847	0.0416	43.0457	0.03769	43.1627	0.03454	46.1032	0.03204	53.9436	0.02935	--	--	29.7732	0.02396
--	--	--	--	25.006	0.04349	44.8688	0.04152	42.5467	0.03762	42.6614	0.0345	45.647	0.03198	53.556	0.02932	--	--	28.9103	0.024
--	--	--	--	23.8224	0.04352	44.3828	0.04144	42.033	0.03754	42.1338	0.03448	45.1614	0.03192	53.2167	0.0293	--	--	28.0195	0.02405
--	--	--	--	23.9499	0.04358	43.9306	0.04137	41.5291	0.03747	41.6556	0.03446	44.7143	0.03187	52.8338	0.02927	--	--	27.0923	0.02411
--	--	--	--	21.1437	0.04367	43.4344	0.04129	41.0404	0.03741	41.1662	0.03444	44.2644	0.03181	52.4507	0.02925	--	--	26.1039	0.02419
--	--	--	--	19.638	0.04381	42.9659	0.04122	40.5364	0.03735	40.6545	0.03442	43.8114	0.03177	52.0666	0.02922	--	--	25.0811	0.02428
--	--	--	--	17.9556	0.04401	42.623	0.04115	39.9966	0.0373	40.135	0.0344	43.3274	0.03173	51.6615	0.0292	--	--	23.9573	0.02439
--	--	--	--	16.1156	0.04427	42.0199	0.04108	39.4286	0.03725	39.5573	0.03439	42.8416	0.0317	51.2391	0.02918	--	--	22.8828	0.02453
--	--	--	--	14.0743	0.0446	41.4222	0.04101	38.8662	0.0372	39.0095	0.03438	42.3257	0.03168	50.8356	0.02916	--	--	21.5094	0.0247
--	--	--	--	11.9202	0.04495	40.8989	0.04094	38.3481	0.03716	38.4943	0.03437	41.8329	0.03166	50.4271	0.02914	--	--	20.1319	0.0249
--	--	--	--	10.1157	0.04533	40.3761	0.04088	37.7727	0.03711	37.9534	0.03436	41.3392	0.03164	49.9925	0.02911	--	--	18.4084	0.02514
--	--	--	--	8.6254	0.04569	39.8198	0.04081	37.1849	0.03707	37.3867	0.03435	40.8435	0.03162	49.5988	0.02908	--	--	16.7444	0.0254
--	--	--	--	7.26646	0.046	39.2309	0.04074	36.5728	0.03704	36.8053	0.03434	40.3155	0.03161	49.2202	0.02905	--	--	15.138	0.02568
--	--	--	--	6.394	0.04625	38.68	0.04067	35.9243	0.03701	36.169	0.03434	39.7612	0.03159	48.8008	0.02902	--	--	13.1939	0.02595
--	--	--	--	5.772	0.04645	38.1146	0.0406	35.3414	0.03699	35.5644	0.03434	39.1884	0.03157	48.3745	0.02899	--	--	11.5793	0.0262
--	--	--	--	5.3096	0.04659	37.5134	0.04053	34.7037	0.03696	34.9469	0.03434	38.6636	0.03155	47.9749	0.02897	--	--	10.4425	0.02642
--	--	--	--	5.03331	0.0467	36.9099	0.04046	34.0407	0.03695	34.2975	0.03432	38.1158	0.03153	47.5774	0.02894	--	--	9.64347	0.02661
--	--	--	--	4.7644	0.04678	36.2557	0.04039	33.3141	0.03693	33.5968	0.03431	37.5642	0.0315	47.1417	0.02891	--	--	9.02564	0.02678
--	--	--	--	4.5374	0.04687	35.6376	0.04033	32.6111	0.0369	32.8693	0.03429	36.966	0.03148	46.7343	0.02889	--	--	8.40781	0.02692
--	--	--	--	4.3393	0.04694	34.9976	0.04027	31.8974	0.03687	32.1876	0.03428	36.3455	0.03145	46.3023	0.02886	--	--	7.64994	0.02704
--	--	--	--	4.1402	0.04702	34.3333	0.04021	31.1323	0.03682	31.4227	0.03426	35.7255	0.03143	45.8255	0.02884	--	--	7.22158	0.02715
--	--	--	--	3.9574	0.0471	33.6013	0.04015	30.6799	0.03678	30.6065	0.03425	35.1649	0.03142	45.392	0.02881	--	--	6.6892	0.02726
--	--	--	--	3.7853	0.04718	32.8809	0.04009	29.9187	0.03674	29.8296	0.03422	34.519	0.0314	44.9334	0.02879	--	--	6.3432	0.02735
--	--	--	--	3.6297	0.04725	32.1345	0.04004	28.4859	0.0367	28.9762	0.03423	33.8302	0.03138	44.4948	0.02877	--	--	6.0528	0.02744
--	--	--	--	3.50418	0.04732	31.3466	0.03999	27.5904	0.03668	28.1063	0.03424	33.1095	0.03137	44.0562	0.02875	--	--	5.7901	0.02751
--	--	--	--	3.3961	0.04738	30.5424	0.03994	26.9412	0.03667	27.1818	0.03426	32.4258	0.03137	43.5831	0.02873	--	--	5.5056	0.02758
--	--	--	--	3.28853	0.04743	29.7241	0.03989	25.9114	0.03668	26.1782	0.03431	31.6806	0.03137	43.1308	0.02871	--	--	5.2802	0.02764
--	--	--	--	3.20661	0.04747	29.0238	0.03986	24.6353	0.03672	25.134	0.03436	30.8819	0.03138	42.6394	0.02869	--	--	5.0706	0.0277
--	--	--	--	3.13934	0.04751	27.8943	0.03983	23.6127	0.03677	24.0046	0.03443	30.1089	0.0314	42.1361	0.02867	--	--	4.8773	0.02776
--	--	--	--	3.08961	0.04753	26.9071	0.0398	22.3771	0.03684	22.6527	0.03453	29.2599	0.03142	41.6724	0.02865	--	--	4.7137	0.02781
--	--	--	--	3.02872	0.04756	25.8901	0.03978	21.0249	0.03694	21.4779	0.03465	28.403	0.03145	41.1822	0.02863	--	--	4.547	0.02786
--	--	--	--	2.98458	0.04758	24.8021	0.03978	19.544	0.03708	20.0431	0.0348	27.4525	0.03147	40.6639	0.02861	--	--	4.4097	0.02791
--	--	--	--	2.95261	0.0476	23.0402	0.03981	17.9427	0.03726	18.505	0.03504	26.4886	0.03151	40.1483	0.02859	--	--	4.2751	0.02796
--	--	--	--	2.89984	0.04762	21.3373	0.03985	15.9938	0.03749	16.8068	0.03534	25.4854	0.03154	39.6104	0.02858	--	--	4.1541	0.02801
--	--	--	--	2.85315	0.04765	19.9064	0.03993	13.6878	0.03775	14.947	0.03566	24.3662	0.03159	39.0649	0.02857	--	--	4.0426	0.02805
--	--	--	--	2.7948	0.04768	18.5465	0.04004	11.6282	0.03803	12.936	0.03598	23.2285	0.03166	38.5505	0.02856	--	--	3.9405	0.0281
--	--	--	--	2.72173	0.04771	16.7018	0.04019	9.94916	0.03831	10.8986	0.03628	21.9504	0.03177	38.0238	0.02855	--	--	3.8445	0.02815
--	--	--	--	2.63445	0.04774	15.0107	0.0404	8.6568	0.03858	9.4795	0.03652	20.5612	0.03193	37.4406	0.02854	--	--	3.7574	0.0282
--	--	--	--	2.56747	0.04778	12.894	0.04064	7.5701	0.03881	8.646	0.03668	19.0518	0.03213	36.8729	0.02853	--	--	3.6807	0.02825
--	--	--	--	2.46801	0.04781	11.3331	0.04092	6.6871	0.039	7.943	0.0368	17.3945	0.0324	36.2528	0.02852	--	--	3.6098	0.02828
--	--	--	--	2.39799	0.04784	9.35821	0.04121	6.0452	0.03915	7.5215	0.03692	15.5898	0.0327	35.6789	0.02852	--	--	3.5456	0.02832
--	--	--	--	2.33659	0.04786	8.195	0.04151	5.5681	0.03928	7.1217	0.03706	13.6529	0.03304	35.0844	0.02851	--	--	3.473	0.02834
--	--	--	--	2.28128	0.04789	6.9685	0.0418	5.1012	0.03939	6.7983	0.03717	11.5645	0.0334	34.4628	0.0285	--	--	3.403	0.02834
--	--	--	--	2.2346	0.04791	6.0505	0.04206	4.6228	0.03949	6.5247	0.03721	9.6567	0.03375	33.7851	0.0285	--	--	3.3499	0.02834
--	--	--	--	2.19349	0.04793	5.3415	0.04227	4.21	0.03959	6.2457	0.0372	8.168	0.03406	33.0838	0.0285	--	--	3.3205	0.02834
--	--	--	--	2.14681	0.04796	4.8683	0.04243	3.9142	0.03969	6.0538	0.03717	7.0589	0.03433	32.4215	0.0285	--	--	3.3178	0.02833
--	--	--	--	2.09455	0.04798	4.5215	0.04258	3.6922	0.03979	5.8695	0.03712	6.1428	0.03455	31.7142	0.02851	--	--	3.3341	0.02834
--	--	--	--	2.04482	0.048	4.2476	0.04268	3.5011	0.03988	5.6967	0.03702	5.4015	0.03472	30.9412	0.02852	--	--	3.3453	0.02834
--	--	--	--	1.9967	0.04802	4.0212	0.04276	3.3211	0.03996	5.582	0.03691	4.8702	0.03483	30.1999	0.02854	--	--	3.3387	0.02835
--	--	--	--	1.96566	0.04804	3.8261	0.04283	3.1604	0.04001	5.4776	0.03689	4.5375	0.03491	29.3519	0.02858	--	--	3.3134	0.02837
--	--	--	--	1.92811	0.04805	3.6574	0.04289	3.0252	0.04004	5.3575	0.0369	4.3066	0.03495	28.5631	0.02862	--	--	3.2731	0.0284
--	--	--	--	1.90323	0.04807	3.5037	0.04296	2.92	0.04004	5.2458	0.03692	4.17778	0.03499	27.6596	0.02867	--	--	3.2256	0.02842
--	--	--	--	1.88213	0.04808	3.3643	0.04303	2.828	0.04002	5.1693	0.0369	3.99166	0.03501	26.7422	0.02873	--	--	3.1798	0.02844
--	--	--	--	1.85317	0.0481	3.2402	0.04309	2.7559	0.03999	5.2006	0.03688	3.8986	0.03503	25.7465	0.0288	--	--	3.1325	0.02847
--	--	--	--	1.8263	0.04811	3.1308	0.04314	2.6942	0.03997	5.2954	0.03685	3.75901	0.03505	24.7084	0.02889	--	--	3.0832	0.0285
--	--	--	--	1.8074	0.04812	3.0316	0.04317	2.6373	0.03996	5.2956	0.03687	3.61942	0.03507	23.6019	0.029	--	--	3.0342	0.02853
--	--	--	--	1.7908	0.04814	2.9473	0.04322	2.5877	0.03996	5.2907	0.03687	3.49196	0.03509	22.2755	0.02914	--	--	2.9892	0.02856
--	--	--	--	1.7751	0.04815	2.8737	0.04323	2.5502	0.03998	5.2123	0.03686	3.41104	0.0351	21.0704	0.02933	--	--	2.9505	0.02858
--	--	--	--	1.7513	0.04817	2.8054	0.04326	2.5158	0.04002	5.1347	0.03686	3.34023	0.03512	19.6529	0.02957	--	--	2.9129	0.02859
--	--	--	--	1.72471	0.04819	2.7553	0.04327	2.4829	0.04006	5.1393	0.03687	3.23504	0.03513	18.0913	0.02984	--	--	2.8802	0.02859
--	--	--	--	1.7106	0.0482	2.7097	0.04327	2.454	0.04011	5.1201	0.03683	3.11972	0.03515	16.3722	0.03015	--	--	2.8474	0.02858
--	--	--	--	1.69011	0.04823	2.7255	0.04328	2.4226	0.04014	5.2379	0.03679	3.07319	0.03516	14.5415	0.03048	--	--	2.8162	0.02857
--	--	--	--	1.66471	0.04825	2.7707	0.04329	2.397	0.04016	5.2936	0.03677	2.99174	0.03517	12.4822	0.03081	--	--	2.785	0.02857
--	--	--	--	1.62864	0.04827	2.7923	0.04329	2.381	0.04019	5.3463	0.03674	2.88489	0.03519	10.5877	0.03111	--	--	2.7607	0.02857
--	--	--	--	1.60532	0.04829	2.7817	0.0433	2.3668	0.0402	5.3473	0.03675	2.82473	0.0352	9.2131	0.03137	--	--	2.7393	0.02859
--	--	--	--	--	--	2.7446	0.04331	2.3532	0.04022	5.4328	0.03677	2.74692	0.03521	8.44413	0.03158	--	--	2.7199	0.02863
--	--	--	--	--	--	2.6955	0.04333	2.3401	0.04024	5.47	0.03679	2.68157	0.03522	7.67121	0.03174	--	--	2.6974	0.02868
--	--	--	--	--	--	2.6369	0.04335	2.3289	0.04026	5.4137	0.03681	2.62763	0.03522	7.26109	0.03186	--	--	2.6759	0.02872
--	--	--	--	--	--	2.5734	0.04337	2.318	0.04028	5.3076	0.03684	2.5685	0.03523	6.83125	0.03194	--	--	2.6565	0.02876
--	--	--	--	--	--	2.5143	0.04339	2.3056	0.04029	5.2881	0.03691	2.52078	0.03524	6.66467	0.03201	--	--	2.6396	0.02879
--	--	--	--	--	--	2.4507	0.0434	2.296	0.0403	5.207	0.03695	2.45439	0.03524	6.3894	0.03207	--	--	2.6267	0.02881
--	--	--	--	--	--	2.3896	0.04342	2.2861	0.04029	5.0422	0.03701	2.41912	0.03525	6.13049	0.03212	--	--	2.6118	0.02882
--	--	--	--	--	--	2.3411	0.04343	2.2758	0.04027	4.9625	0.03709	2.39526	0.03526	5.91741	0.03217	--	--	2.5945	0.02883
--	--	--	--	--	--	2.29	0.04345	2.2625	0.04023	4.8502	0.03713	2.32368	0.03526	5.70433	0.03222	--	--	2.5804	0.02883
--	--	--	--	--	--	2.2391	0.0435	2.2522	0.04019	4.7821	0.03722	2.27596	0.03527	5.54865	0.03227	--	--	2.5682	0.02883
--	--	--	--	--	--	2.1915	0.04354	2.2485	0.04014	4.7919	0.03727	2.26352	0.03528	5.38614	0.03231	--	--	2.5577	0.02884
--	--	--	--	--	--	2.1556	0.04356	2.2594	0.04011	4.7139	0.03731	2.19816	0.03529	5.19543	0.03236	--	--	2.548	0.02884
--	--	--	--	--	--	2.1171	0.04359	2.2888	0.0401	4.623	0.03733	2.13903	0.03529	5.05282	0.0324	--	--	2.5401	0.02883
--	--	--	--	--	--	2.0814	0.04359	2.3148	0.04011	4.5108	0.03733	2.12036	0.0353	4.90314	0.03243	--	--	2.5339	0.02882
--	--	--	--	--	--	2.0469	0.0436	2.3311	0.04012	4.4402	0.0373	2.11517	0.0353	4.7554	0.03247	--	--	2.5225	0.02881
--	--	--	--	--	--	2.0115	0.0436	2.3271	0.04014	4.408	0.03727	2.09131	0.03531	4.6588	0.0325	--	--	2.5112	0.0288
--	--	--	--	--	--	1.9833	0.0436	2.3214	0.04016	4.3882	0.03726	2.02492	0.03532	4.52811	0.03253	--	--	2.4995	0.0288
--	--	--	--	--	--	1.9613	0.04357	2.3348	0.04016	4.3489	0.03727	2.00106	0.03532	4.44572	0.03256	--	--	2.4878	0.02881
--	--	--	--	--	--	1.9394	0.04359	2.3666	0.04015	4.2985	0.03728	1.94193	0.03533	4.30825	0.03258	--	--	2.4763	0.02882
--	--	--	--	--	--	1.9196	0.04362	2.3975	0.04014	4.2196	0.03734	1.89422	0.03534	4.18554	0.03261	--	--	2.4652	0.02883
--	--	--	--	--	--	1.9002	0.04362	2.418	0.04011	4.1423	0.03737	1.88177	0.03535	4.10926	0.03263	--	--	2.4549	0.02884
--	--	--	--	--	--	1.8814	0.04362	2.4225	0.04009	4.0947	0.0374	1.8465	0.03536	4.04127	0.03266	--	--	2.4454	0.02886
--	--	--	--	--	--	1.8634	0.04362	2.4112	0.04009	4.0851	0.03744	1.77492	0.03537	3.94675	0.03268	--	--	2.4368	0.02886
--	--	--	--	--	--	1.846	0.04363	2.3928	0.04009	4.0346	0.03743	1.74484	0.03538	3.82238	0.03271	--	--	2.4285	0.02887
--	--	--	--	--	--	1.8305	0.04364	2.3725	0.04011	3.9991	0.0374	1.71475	0.03538	3.7461	0.03274	--	--	2.4212	0.02887
--	--	--	--	--	--	1.8145	0.04366	2.3529	0.04013	3.9668	0.03735	1.66703	0.03539	3.66982	0.03277	--	--	2.4161	0.02887
--	--	--	--	--	--	1.8013	0.04367	2.3274	0.04016	4.1514	0.03731	1.64087	0.0354	3.53549	0.0328	--	--	2.4174	0.02886
--	--	--	--	--	--	1.7915	0.04366	2.2976	0.04018	4.3449	0.03724			3.38293	0.03283	--	--	2.4182	0.02886
--	--	--	--	--	--	1.7825	0.04368	2.2678	0.0402	4.5003	0.03716			3.20218	0.03287	--	--	2.4186	0.02886
--	--	--	--	--	--	1.7718	0.04367	2.2391	0.0402	4.6724	0.03712			3.03967	0.0329	--	--	2.4206	0.02885
--	--	--	--	--	--	1.756	0.04366	2.213	0.0402	4.78	0.03705			2.94515	0.03294	--	--	2.4227	0.02885
--	--	--	--	--	--	1.7379	0.04365	2.1905	0.04022	4.8502	0.037			2.83902	0.03297	--	--	2.426	0.02885
--	--	--	--	--	--	1.7188	0.04363	2.1706	0.04023	4.9808	0.03697			2.7163	0.03301	--	--	2.4297	0.02886
--	--	--	--	--	--	1.7013	0.04364	2.1544	0.04026	5.144	0.03692			2.59193	0.03306	--	--	2.4323	0.02886
--	--	--	--	--	--	1.6897	0.04364	2.1409	0.04029	5.1685	0.03692			2.40123	0.0331	--	--	2.4341	0.02887
--	--	--	--	--	--	1.682	0.04365	2.1269	0.04033	5.0693	0.03693			2.25696	0.03315	--	--	2.4355	0.02887
--	--	--	--	--	--	1.6776	0.04366	2.111	0.04037	4.9611	0.03695			2.05919	0.0332	--	--	2.4375	0.02887
--	--	--	--	--	--	1.6735	0.04369	2.096	0.04041	4.9359	0.03693			1.8802	0.03325	--	--	2.4388	0.02887
--	--	--	--	--	--	1.6708	0.04372	2.0817	0.04045	4.9393	0.03693			--	--	--	--	2.4393	0.02887
--	--	--	--	--	--	1.6668	0.04375	2.066	0.04048	4.8887	0.03691			--	--	--	--	2.4406	0.02887
--	--	--	--	--	--	--	--	2.052	0.0405	4.9685	0.03685			--	--	--	--	2.4396	0.02887
--	--	--	--	--	--	--	--	2.0397	0.04051	5.0958	0.03678			--	--	--	--	2.4332	0.02887
--	--	--	--	--	--	--	--	2.0239	0.0405	5.1491	0.0367			--	--	--	--	2.423	0.02888
--	--	--	--	--	--	--	--	2.0108	0.04048	5.4221	0.03663			--	--	--	--	2.4153	0.02888
--	--	--	--	--	--	--	--	2.0016	0.04044	5.5677	0.0366			--	--	--	--	2.3992	0.02889
--	--	--	--	--	--	--	--	1.9945	0.04039	5.7342	0.03658			--	--	--	--	2.3872	0.02889
--	--	--	--	--	--	--	--	1.9891	0.04035	5.8559	0.03657			--	--	--	--	2.3764	0.02889
--	--	--	--	--	--	--	--	1.9838	0.04031	5.9156	0.03658			--	--	--	--	2.3671	0.02889
--	--	--	--	--	--	--	--	1.9754	0.04029	5.9328	0.0366			--	--	--	--	2.3584	0.0289
--	--	--	--	--	--	--	--	1.9679	0.0403	5.9435	0.03661			--	--	--	--	2.3504	0.0289
--	--	--	--	--	--	--	--	1.9601	0.04032	5.8882	0.03663			--	--	--	--	2.3443	0.02891
--	--	--	--	--	--	--	--	1.9515	0.04034	5.8565	0.03663			--	--	--	--	2.3377	0.02891
--	--	--	--	--	--	--	--	1.9489	0.04037	5.7632	0.03663			--	--	--	--	2.3329	0.02892
--	--	--	--	--	--	--	--	1.9483	0.04037	5.6064	0.03664			--	--	--	--	2.329	0.02893
--	--	--	--	--	--	--	--	1.9442	0.04037	5.4499	0.03666			--	--	--	--	2.3252	0.02893
--	--	--	--	--	--	--	--	1.9397	0.04037	5.4213	0.03668			--	--	--	--	2.3194	0.02894
--	--	--	--	--	--	--	--	1.9351	0.04036	5.4333	0.03672			--	--	--	--	2.3148	0.02894
--	--	--	--	--	--	--	--	1.9315	0.04036	5.333	0.03677			--	--	--	--	2.3095	0.02895
--	--	--	--	--	--	--	--	1.9278	0.04037	5.1957	0.03681			--	--	--	--	2.3043	0.02895
--	--	--	--	--	--	--	--	1.9279	0.04039	5.0798	0.03684			--	--	--	--	2.3007	0.02896
--	--	--	--	--	--	--	--	1.9292	0.0404	4.9263	0.03689			--	--	--	--	2.2974	0.02896
--	--	--	--	--	--	--	--	1.9242	0.0404	4.8008	0.03696			--	--	--	--	2.295	0.02897
--	--	--	--	--	--	--	--	1.9199	0.04038	4.6617	0.03703			--	--	--	--	2.2928	0.02897
--	--	--	--	--	--	--	--	1.919	0.04036	4.5426	0.03711			--	--	--	--	2.2924	0.02897
--	--	--	--	--	--	--	--	1.9228	0.04035	4.4336	0.03719			--	--	--	--	2.2931	0.02896
--	--	--	--	--	--	--	--	1.9272	0.04034	4.266	0.03724			--	--	--	--	2.2947	0.02895
--	--	--	--	--	--	--	--	1.9243	0.04034	4.1355	0.0373			--	--	--	--	2.2976	0.02894
--	--	--	--	--	--	--	--	1.9203	0.04036	4.0077	0.0373			--	--	--	--	2.3001	0.02893
--	--	--	--	--	--	--	--	1.9115	0.04037	3.9276	0.03729			--	--	--	--	2.2957	0.02894
--	--	--	--	--	--	--	--	1.9071	0.04038	3.894	0.03726			--	--	--	--	2.2895	0.02894
--	--	--	--	--	--	--	--	1.9014	0.04038	3.8909	0.03726			--	--	--	--	2.2817	0.02895
--	--	--	--	--	--	--	--	1.8954	0.04037	3.8996	0.03725			--	--	--	--	2.2734	0.02896
--	--	--	--	--	--	--	--	1.8914	0.04034	3.9629	0.03723			--	--	--	--	2.2606	0.02898
--	--	--	--	--	--	--	--	1.8856	0.04031	4.0305	0.03717			--	--	--	--	2.2485	0.02899
--	--	--	--	--	--	--	--	1.8797	0.04029	4.097	0.03712			--	--	--	--	2.2361	0.029
--	--	--	--	--	--	--	--	1.8729	0.04028	4.1495	0.03708			--	--	--	--	2.2242	0.02901
--	--	--	--	--	--	--	--	1.8682	0.04027	4.2579	0.03707			--	--	--	--	2.2136	0.02901
--	--	--	--	--	--	--	--	1.8623	0.04028	4.2829	0.03699			--	--	--	--	2.2087	0.02902
--	--	--	--	--	--	--	--	1.8593	0.04031	4.3177	0.037			--	--	--	--	2.2004	0.02902
--	--	--	--	--	--	--	--	1.8488	0.04035	4.2579	0.03711			--	--	--	--	2.1945	0.02903
--	--	--	--	--	--	--	--	1.8414	0.0404	4.2059	0.03728			--	--	--	--	2.1882	0.02904
--	--	--	--	--	--	--	--	1.8366	0.04045	4.1379	0.03745			--	--	--	--	2.1852	0.02905
--	--	--	--	--	--	--	--	1.8358	0.0405	4.1003	0.03764			--	--	--	--	2.1817	0.02907
--	--	--	--	--	--	--	--	1.83	0.04055	4.0214	0.03782			--	--	--	--	2.1764	0.02908
--	--	--	--	--	--	--	--	1.8232	0.04059	3.999	0.038			--	--	--	--	2.1725	0.02909
--	--	--	--	--	--	--	--	1.8212	0.04062	3.8644	0.03816			--	--	--	--	2.1707	0.0291
--	--	--	--	--	--	--	--	1.8159	0.04063	3.7069	0.03824			--	--	--	--	2.1661	0.0291
--	--	--	--	--	--	--	--	1.8094	0.04064	3.6028	0.03821			--	--	--	--	2.1625	0.0291
--	--	--	--	--	--	--	--	1.8039	0.04063	3.5501	0.03822			--	--	--	--	2.1613	0.02911
--	--	--	--	--	--	--	--	1.7986	0.04062	3.5059	0.03823			--	--	--	--	2.1591	0.02911
--	--	--	--	--	--	--	--	1.7936	0.0406	3.4987	0.03819			--	--	--	--	2.1533	0.02912
--	--	--	--	--	--	--	--	1.7886	0.04058	3.6019	0.03817			--	--	--	--	2.1497	0.02912
--	--	--	--	--	--	--	--	1.7837	0.04058	3.7124	0.03809			--	--	--	--	2.1467	0.02912
--	--	--	--	--	--	--	--	1.7791	0.04058	3.8349	0.03801			--	--	--	--	2.1432	0.02912
--	--	--	--	--	--	--	--	1.7757	0.04058	3.9314	0.03792			--	--	--	--	2.1395	0.02912
--	--	--	--	--	--	--	--	1.7725	0.04061	4.0394	0.03783			--	--	--	--	2.1361	0.02912
--	--	--	--	--	--	--	--	1.7678	0.04065	4.1457	0.03771			--	--	--	--	2.1324	0.02911
--	--	--	--	--	--	--	--	1.7593	0.04069	4.3028	0.03763			--	--	--	--	2.1306	0.02912
--	--	--	--	--	--	--	--	1.7505	0.04073	4.3391	0.03758			--	--	--	--	2.1299	0.02912
--	--	--	--	--	--	--	--	1.7452	0.04076	4.3614	0.03755			--	--	--	--	2.1288	0.02912
--	--	--	--	--	--	--	--	1.7387	0.04077	4.2793	0.03756			--	--	--	--	2.1289	0.02912
--	--	--	--	--	--	--	--	1.7361	0.04078	4.1497	0.03763			--	--	--	--	2.1279	0.02912
--	--	--	--	--	--	--	--	1.7355	0.04078	4.0476	0.03768			--	--	--	--	2.1282	0.02913
--	--	--	--	--	--	--	--	1.7309	0.04077	3.9206	0.03774			--	--	--	--	2.1294	0.02913
--	--	--	--	--	--	--	--	1.726	0.04075	3.8173	0.03778			--	--	--	--	2.1299	0.02913
--	--	--	--	--	--	--	--	1.7222	0.04075	3.712	0.03778			--	--	--	--	2.1285	0.02914
--	--	--	--	--	--	--	--	1.7193	0.04076	3.6042	0.03777			--	--	--	--	2.1281	0.02914
--	--	--	--	--	--	--	--	1.7176	0.04077	3.6604	0.03777			--	--	--	--	2.1278	0.02913
--	--	--	--	--	--	--	--	1.7152	0.0408	3.7777	0.03778			--	--	--	--	2.1297	0.02913
--	--	--	--	--	--	--	--	1.7159	0.04082	3.8669	0.03785			--	--	--	--	2.1291	0.02912
--	--	--	--	--	--	--	--	1.7187	0.04084	3.9062	0.03782			--	--	--	--	2.1262	0.02911
--	--	--	--	--	--	--	--	1.7204	0.04084	3.9844	0.03775			--	--	--	--	2.1259	0.02911
--	--	--	--	--	--	--	--	1.7204	0.04083	4.0074	0.03764			--	--	--	--	2.1275	0.02911
--	--	--	--	--	--	--	--	1.7216	0.0408	4.0193	0.03752			--	--	--	--	2.1309	0.02912
--	--	--	--	--	--	--	--	1.7219	0.04075	4.0195	0.03738			--	--	--	--	2.1352	0.02912
--	--	--	--	--	--	--	--	1.7237	0.04068	3.9616	0.03723			--	--	--	--	2.1381	0.02913
--	--	--	--	--	--	--	--	1.723	0.04062	3.9059	0.03713			--	--	--	--	2.1454	0.02913
--	--	--	--	--	--	--	--	1.7188	0.04057	3.864	0.03706			--	--	--	--	2.1527	0.02914
--	--	--	--	--	--	--	--	1.7159	0.04053	3.8963	0.03706			--	--	--	--	2.1518	0.02914
--	--	--	--	--	--	--	--	1.7099	0.0405	3.9381	0.03709			--	--	--	--	2.1442	0.02915
--	--	--	--	--	--	--	--	1.7038	0.04049	3.9861	0.03705			--	--	--	--	2.1339	0.02915
--	--	--	--	--	--	--	--	1.6976	0.04049	4.0643	0.03702			--	--	--	--	2.1238	0.02915
--	--	--	--	--	--	--	--	1.6949	0.0405	4.1117	0.03702			--	--	--	--	2.1121	0.02916
--	--	--	--	--	--	--	--	1.6902	0.04052	4.105	0.03705			--	--	--	--	2.0975	0.02916
--	--	--	--	--	--	--	--	1.6883	0.04053	4	0.03711			--	--	--	--	2.0872	0.02916
--	--	--	--	--	--	--	--	1.684	0.04055	3.9163	0.03716			--	--	--	--	2.0728	0.02917
--	--	--	--	--	--	--	--	1.6824	0.04056	3.8625	0.03724			--	--	--	--	2.0601	0.02917
--	--	--	--	--	--	--	--	1.6792	0.04056	3.8174	0.03728			--	--	--	--	2.0474	0.02917
--	--	--	--	--	--	--	--	1.6763	0.04056	3.7961	0.03734			--	--	--	--	2.0372	0.02917
--	--	--	--	--	--	--	--	1.6746	0.04055	3.7353	0.03732			--	--	--	--	2.0298	0.02917
--	--	--	--	--	--	--	--	1.6716	0.04054	3.6972	0.03733			--	--	--	--	2.0259	0.02918
--	--	--	--	--	--	--	--	1.6711	0.04052	3.751	0.03732			--	--	--	--	2.0162	0.02918
--	--	--	--	--	--	--	--	1.6676	0.0405	3.8262	0.0373			--	--	--	--	2.0136	0.02919
--	--	--	--	--	--	--	--	1.6626	0.04047	3.8841	0.03732			--	--	--	--	2.0085	0.0292
--	--	--	--	--	--	--	--	--	--	3.9048	0.03733			--	--	--	--	1.9999	0.0292
--	--	--	--	--	--	--	--	--	--	3.8536	0.0373			--	--	--	--	1.9973	0.02921
--	--	--	--	--	--	--	--	--	--	3.7814	0.03733			--	--	--	--	1.9919	0.02921
--	--	--	--	--	--	--	--	--	--	3.7	0.03732			--	--	--	--	1.9868	0.02921
--	--	--	--	--	--	--	--	--	--	3.6172	0.03737			--	--	--	--	1.9781	0.02921
--	--	--	--	--	--	--	--	--	--	3.5254	0.03739			--	--	--	--	1.9735	0.02921
--	--	--	--	--	--	--	--	--	--	3.4282	0.0374			--	--	--	--	1.9677	0.02922
--	--	--	--	--	--	--	--	--	--	3.3579	0.03737			--	--	--	--	1.9615	0.02922
--	--	--	--	--	--	--	--	--	--	3.3232	0.03735			--	--	--	--	1.9577	0.02922
--	--	--	--	--	--	--	--	--	--	3.2791	0.03733			--	--	--	--	1.9505	0.02922
--	--	--	--	--	--	--	--	--	--	3.2673	0.03731			--	--	--	--	1.9468	0.02922
--	--	--	--	--	--	--	--	--	--	3.2553	0.03723			--	--	--	--	1.9406	0.02922
--	--	--	--	--	--	--	--	--	--	3.2369	0.03719			--	--	--	--	1.937	0.02922
--	--	--	--	--	--	--	--	--	--	3.2271	0.03716			--	--	--	--	1.9322	0.02922
--	--	--	--	--	--	--	--	--	--	3.2785	0.03719			--	--	--	--	1.9268	0.02923
--	--	--	--	--	--	--	--	--	--	3.3506	0.03723			--	--	--	--	1.9207	0.02924
--	--	--	--	--	--	--	--	--	--	3.3766	0.03724			--	--	--	--	1.9166	0.02925
--	--	--	--	--	--	--	--	--	--	3.3688	0.03725			--	--	--	--	1.9111	0.02926
--	--	--	--	--	--	--	--	--	--	3.3168	0.03731			--	--	--	--	1.9038	0.02926
--	--	--	--	--	--	--	--	--	--	3.2785	0.03733			--	--	--	--	1.8975	0.02927
--	--	--	--	--	--	--	--	--	--	3.2647	0.03733			--	--	--	--	1.8922	0.02927
--	--	--	--	--	--	--	--	--	--	3.2499	0.0373			--	--	--	--	1.8866	0.02927
--	--	--	--	--	--	--	--	--	--	3.2263	0.03723			--	--	--	--	1.8821	0.02926
--	--	--	--	--	--	--	--	--	--	3.246	0.0372			--	--	--	--	1.8775	0.02926
--	--	--	--	--	--	--	--	--	--	3.2972	0.03718			--	--	--	--	1.8736	0.02926
--	--	--	--	--	--	--	--	--	--	3.3607	0.03717			--	--	--	--	1.8693	0.02925
--	--	--	--	--	--	--	--	--	--	3.3467	0.03713			--	--	--	--	1.8653	0.02924
--	--	--	--	--	--	--	--	--	--	3.3673	0.03716			--	--	--	--
--	--	--	--	--	--	--	--	--	--	3.3756	0.03719			--	--	--	--
--	--	--	--	--	--	--	--	--	--	3.3709	0.03717			--	--	--	--
--	--	--	--	--	--	--	--	--	--	3.3537	0.03718			--	--	--	--
--	--	--	--	--	--	--	--	--	--	3.3276	0.03723			--	--	--	--
--	--	--	--	--	--	--	--	--	--	3.2353	0.03726			--	--	--	--
--	--	--	--	--	--	--	--	--	--	3.1419	0.03728			--	--	--	--
--	--	--	--	--	--	--	--	--	--	3.0478	0.03734			--	--	--	--
--	--	--	--	--	--	--	--	--	--	2.9772	0.03737			--	--	--	--
--	--	--	--	--	--	--	--	--	--	2.9283	0.03739			--	--	--	--
--	--	--	--	--	--	--	--	--	--	2.9123	0.03743			--	--	--	--
--	--	--	--	--	--	--	--	--	--	2.9211	0.03741			--	--	--	--
--	--	--	--	--	--	--	--	--	--	2.9259	0.03738			--	--	--	--
--	--	--	--	--	--	--	--	--	--	2.9322	0.03738			--	--	--	--
--	--	--	--	--	--	--	--	--	--	2.9601	0.03742			--	--	--	--
--	--	--	--	--	--	--	--	--	--	2.9821	0.03743			--	--	--	--
--	--	--	--	--	--	--	--	--	--	2.996	0.0374			--	--	--	--
--	--	--	--	--	--	--	--	--	--	3.0376	0.0374			--	--	--	--
--	--	--	--	--	--	--	--	--	--	3.0853	0.03732			--	--	--	--
--	--	--	--	--	--	--	--	--	--	3.1349	0.03725			--	--	--	--
--	--	--	--	--	--	--	--	--	--	3.2648	0.0372			--	--	--	--
--	--	--	--	--	--	--	--	--	--	3.4689	0.03714			--	--	--	--
--	--	--	--	--	--	--	--	--	--	3.6909	0.03712			--	--	--	--
--	--	--	--	--	--	--	--	--	--	3.8456	0.03713			--	--	--	--
--	--	--	--	--	--	--	--	--	--	3.9072	0.03715			--	--	--	--
--	--	--	--	--	--	--	--	--	--	3.9459	0.03715			--	--	--	--
--	--	--	--	--	--	--	--	--	--	4.0072	0.03717			--	--	--	--
--	--	--	--	--	--	--	--	--	--	4.0848	0.03718			--	--	--	--
--	--	--	--	--	--	--	--	--	--	4.1434	0.03715			--	--	--	--
--	--	--	--	--	--	--	--	--	--	4.181	0.03714			--	--	--	--
--	--	--	--	--	--	--	--	--	--	4.2311	0.03719			--	--	--	--
--	--	--	--	--	--	--	--	--	--	4.2822	0.03718			--	--	--	--
--	--	--	--	--	--	--	--	--	--	4.3008	0.03715			--	--	--	--
--	--	--	--	--	--	--	--	--	--	4.3234	0.03713			--	--	--	--
--	--	--	--	--	--	--	--	--	--	4.3247	0.03707			--	--	--	--
--	--	--	--	--	--	--	--	--	--	4.3426	0.03702			--	--	--	--
--	--	--	--	--	--	--	--	--	--	4.3547	0.03703			--	--	--	--
--	--	--	--	--	--	--	--	--	--	4.3061	0.03701			--	--	--	--
--	--	--	--	--	--	--	--	--	--	4.2551	0.03699			--	--	--	--
--	--	--	--	--	--	--	--	--	--	4.2823	0.03699			--	--	--	--
--	--	--	--	--	--	--	--	--	--	4.3174	0.037			--	--	--	--
--	--	--	--	--	--	--	--	--	--	4.3312	0.03697			--	--	--	--
--	--	--	--	--	--	--	--	--	--	4.3788	0.03692			--	--	--	--
--	--	--	--	--	--	--	--	--	--	4.4514	0.03688			--	--	--	--
--	--	--	--	--	--	--	--	--	--	4.4711	0.03688			--	--	--	--
--	--	--	--	--	--	--	--	--	--	4.5173	0.03681			--	--	--	--
--	--	--	--	--	--	--	--	--	--	4.521	0.03684			--	--	--	--
--	--	--	--	--	--	--	--	--	--	4.4225	0.03693			--	--	--	--
--	--	--	--	--	--	--	--	--	--	4.3164	0.03708			--	--	--	--
--	--	--	--	--	--	--	--	--	--	4.2525	0.03727			--	--	--	--
--	--	--	--	--	--	--	--	--	--	4.2148	0.03746			--	--	--	--
--	--	--	--	--	--	--	--	--	--	4.1715	0.03762			--	--	--	--
--	--	--	--	--	--	--	--	--	--	4.1642	0.03775			--	--	--	--
--	--	--	--	--	--	--	--	--	--	4.1378	0.03786			--	--	--	--
--	--	--	--	--	--	--	--	--	--	4.0771	0.03788			--	--	--	--
--	--	--	--	--	--	--	--	--	--	4.0196	0.0378			--	--	--	--
--	--	--	--	--	--	--	--	--	--	3.9585	0.03781			--	--	--	--
--	--	--	--	--	--	--	--	--	--	3.9135	0.03781			--	--	--	--
--	--	--	--	--	--	--	--	--	--	3.8632	0.03786			--	--	--	--
--	--	--	--	--	--	--	--	--	--	3.745	0.03787			--	--	--	--
--	--	--	--	--	--	--	--	--	--	3.6711	0.03789			--	--	--	--
--	--	--	--	--	--	--	--	--	--	3.6076	0.0379			--	--	--	--
--	--	--	--	--	--	--	--	--	--	3.6155	0.0379			--	--	--	--
--	--	--	--	--	--	--	--	--	--	3.7216	0.03788			--	--	--	--
--	--	--	--	--	--	--	--	--	--	3.7808	0.03783			--	--	--	--
--	--	--	--	--	--	--	--	--	--	3.8553	0.03783			--	--	--	--
--	--	--	--	--	--	--	--	--	--	3.8959	0.03782			--	--	--	--
--	--	--	--	--	--	--	--	--	--	3.9183	0.0378			--	--	--	--
--	--	--	--	--	--	--	--	--	--	3.9506	0.03784			--	--	--	--
--	--	--	--	--	--	--	--	--	--	3.9544	0.03785			--	--	--	--
--	--	--	--	--	--	--	--	--	--	3.9256	0.03789			--	--	--	--
--	--	--	--	--	--	--	--	--	--	3.9242	0.03789			--	--	--	--
--	--	--	--	--	--	--	--	--	--	3.916	0.03791			--	--	--	--
--	--	--	--	--	--	--	--	--	--	3.9237	0.03791			--	--	--	--
--	--	--	--	--	--	--	--	--	--	3.9505	0.0379			--	--	--	--
--	--	--	--	--	--	--	--	--	--	3.9598	0.0379			--	--	--	--
--	--	--	--	--	--	--	--	--	--	3.9202	0.03788			--	--	--	--
--	--	--	--	--	--	--	--	--	--	3.8609	0.03788			--	--	--	--
--	--	--	--	--	--	--	--	--	--	3.8017	0.0379			--	--	--	--
--	--	--	--	--	--	--	--	--	--	3.792	0.03787			--	--	--	--
--	--	--	--	--	--	--	--	--	--	3.7634	0.0378			--	--	--	--
--	--	--	--	--	--	--	--	--	--	3.7629	0.03777			--	--	--	--
--	--	--	--	--	--	--	--	--	--	3.762	0.0378			--	--	--	--
--	--	--	--	--	--	--	--	--	--	3.7612	0.03778			--	--	--	--
--	--	--	--	--	--	--	--	--	--	3.7352	0.03778			--	--	--	--
--	--	--	--	--	--	--	--	--	--	3.6861	0.03779			--	--	--	--
--	--	--	--	--	--	--	--	--	--	3.6632	0.03784			--	--	--	--
--	--	--	--	--	--	--	--	--	--	3.6331	0.03789			--	--	--	--
--	--	--	--	--	--	--	--	--	--	3.6873	0.03792			--	--	--	--
--	--	--	--	--	--	--	--	--	--	3.7062	0.03794			--	--	--	--
--	--	--	--	--	--	--	--	--	--	3.6837	0.03797			--	--	--	--
--	--	--	--	--	--	--	--	--	--	3.6244	0.03802			--	--	--	--
--	--	--	--	--	--	--	--	--	--	3.5741	0.03806			--	--	--	--
--	--	--	--	--	--	--	--	--	--	3.5693	0.03805			--	--	--	--
--	--	--	--	--	--	--	--	--	--	3.5754	0.03807			--	--	--	--
--	--	--	--	--	--	--	--	--	--	3.5973	0.03803			--	--	--	--
--	--	--	--	--	--	--	--	--	--	3.6348	0.03799			--	--	--	--
--	--	--	--	--	--	--	--	--	--	3.6817	0.03802			--	--	--	--
--	--	--	--	--	--	--	--	--	--	3.7021	0.03796			--	--	--	--
--	--	--	--	--	--	--	--	--	--	3.7278	0.03787			--	--	--	--
--	--	--	--	--	--	--	--	--	--	3.7439	0.03773			--	--	--	--
--	--	--	--	--	--	--	--	--	--	3.7105	0.03756			--	--	--	--
--	--	--	--	--	--	--	--	--	--	3.659	0.03738			--	--	--	--
--	--	--	--	--	--	--	--	--	--	3.6259	0.03721			--	--	--	--
--	--	--	--	--	--	--	--	--	--	3.6357	0.0371			--	--	--	--
--	--	--	--	--	--	--	--	--	--	3.6494	0.03701			--	--	--	--
--	--	--	--	--	--	--	--	--	--	3.6474	0.03698			--	--	--	--
--	--	--	--	--	--	--	--	--	--	3.6569	0.03703			--	--	--	--
--	--	--	--	--	--	--	--	--	--	3.6682	0.03704			--	--	--	--
--	--	--	--	--	--	--	--	--	--	3.6083	0.03713			--	--	--	--
--	--	--	--	--	--	--	--	--	--	3.5395	0.03724			--	--	--	--
--	--	--	--	--	--	--	--	--	--	3.4845	0.03735			--	--	--	--
--	--	--	--	--	--	--	--	--	--	3.3976	0.03743			--	--	--	--
--	--	--	--	--	--	--	--	--	--	3.3129	0.03751			--	--	--	--
--	--	--	--	--	--	--	--	--	--	3.2652	0.03761			--	--	--	--
--	--	--	--	--	--	--	--	--	--	3.2514	0.03764			--	--	--	--
--	--	--	--	--	--	--	--	--	--	3.2059	0.03763			--	--	--	--
--	--	--	--	--	--	--	--	--	--	3.1585	0.03757			--	--	--	--
--	--	--	--	--	--	--	--	--	--	3.1223	0.03758			--	--	--	--
--	--	--	--	--	--	--	--	--	--	3.0392	0.03761			--	--	--	--
--	--	--	--	--	--	--	--	--	--	2.9563	0.03764			--	--	--	--
--	--	--	--	--	--	--	--	--	--	2.9127	0.03767			--	--	--	--
--	--	--	--	--	--	--	--	--	--	2.8424	0.03767			--	--	--	--
--	--	--	--	--	--	--	--	--	--	2.7812	0.03769			--	--	--	--
--	--	--	--	--	--	--	--	--	--	2.7458	0.03769			--	--	--	--
--	--	--	--	--	--	--	--	--	--	2.7024	0.03767			--	--	--	--
--	--	--	--	--	--	--	--	--	--	2.7087	0.03766			--	--	--	--
--	--	--	--	--	--	--	--	--	--	2.7392	0.03764			--	--	--	--
--	--	--	--	--	--	--	--	--	--	2.7503	0.03765			--	--	--	--
--	--	--	--	--	--	--	--	--	--	2.7096	0.03768			--	--	--	--
--	--	--	--	--	--	--	--	--	--	2.6696	0.03772			--	--	--	--
--	--	--	--	--	--	--	--	--	--	2.6228	0.03774			--	--	--	--
--	--	--	--	--	--	--	--	--	--	2.5768	0.03773			--	--	--	--
--	--	--	--	--	--	--	--	--	--	2.5301	0.03773			--	--	--	--
--	--	--	--	--	--	--	--	--	--	2.4853	0.03769			--	--	--	--
--	--	--	--	--	--	--	--	--	--	2.4382	0.03768			--	--	--	--
--	--	--	--	--	--	--	--	--	--	2.3959	0.03763			--	--	--	--
--	--	--	--	--	--	--	--	--	--	2.3817	0.03762			--	--	--	--
--	--	--	--	--	--	--	--	--	--	2.4114	0.03759			--	--	--	--
--	--	--	--	--	--	--	--	--	--	2.4335	0.03758			--	--	--	--
--	--	--	--	--	--	--	--	--	--	2.4518	0.03757			--	--	--	--
--	--	--	--	--	--	--	--	--	--	2.4577	0.03757			--	--	--	--
--	--	--	--	--	--	--	--	--	--	2.4544	0.03756			--	--	--	--
--	--	--	--	--	--	--	--	--	--	2.4473	0.0376			--	--	--	--
--	--	--	--	--	--	--	--	--	--	2.4255	0.0376			--	--	--	--
--	--	--	--	--	--	--	--	--	--	2.3944	0.03763			--	--	--	--
--	--	--	--	--	--	--	--	--	--	2.37	0.03767			--	--	--	--
--	--	--	--	--	--	--	--	--	--	2.3525	0.03774			--	--	--	--
--	--	--	--	--	--	--	--	--	--	2.3392	0.03778			--	--	--	--
--	--	--	--	--	--	--	--	--	--	2.3343	0.03782			--	--	--	--
--	--	--	--	--	--	--	--	--	--	2.3483	0.03783			--	--	--	--
--	--	--	--	--	--	--	--	--	--	2.3836	0.03784			--	--	--	--
--	--	--	--	--	--	--	--	--	--	2.4213	0.03786			--	--	--	--
--	--	--	--	--	--	--	--	--	--	2.4401	0.03787			--	--	--	--
--	--	--	--	--	--	--	--	--	--	2.445	0.03781			--	--	--	--
--	--	--	--	--	--	--	--	--	--	2.4616	0.03781			--	--	--	--
--	--	--	--	--	--	--	--	--	--	2.4663	0.03786			--	--	--	--
--	--	--	--	--	--	--	--	--	--	2.4582	0.03787			--	--	--	--
--	--	--	--	--	--	--	--	--	--	2.4452	0.03786			--	--	--	--
--	--	--	--	--	--	--	--	--	--	2.4276	0.03784			--	--	--	--
--	--	--	--	--	--	--	--	--	--	2.4203	0.0378			--	--	--	--
--	--	--	--	--	--	--	--	--	--	2.4337	0.03774			--	--	--	--
--	--	--	--	--	--	--	--	--	--	2.4379	0.0377			--	--	--	--
--	--	--	--	--	--	--	--	--	--	2.4439	0.03765			--	--	--	--
								--	--	2.4752	0.0376			--	--	--	--
								--	--	2.5192	0.03758			--	--	--	--
								--	--	2.5446	0.03758			--	--	--	--
								--	--	2.5481	0.03757			--	--	--	--
								--	--	2.5306	0.0376			--	--	--	--
								--	--	2.5113	0.03761			--	--	--	--
								--	--	2.5013	0.03759			--	--	--	--
								--	--	2.4911	0.03756			--	--	--	--
								--	--	2.5179	0.03753			--	--	--	--
								--	--	2.6065	0.03746			--	--	--	--
								--	--	2.6939	0.0374			--	--	--	--
								--	--	2.7665	0.03732			--	--	--	--
								--	--	2.8257	0.0373			--	--	--	--
								--	--	2.8696	0.03731			--	--	--	--
								--	--	2.873	0.03734			--	--	--	--
								--	--	2.8719	0.03735			--	--	--	--
								--	--	2.8911	0.03735			--	--	--	--
								--	--	2.9113	0.03736			--	--	--	--
								--	--	2.9225	0.03736			--	--	--	--
								--	--	2.9639	0.03735			--	--	--	--
								--	--	3.0222	0.03733			--	--	--	--
								--	--	3.0586	0.03733			--	--	--	--
								--	--	3.069	0.03733			--	--	--	--
								--	--	3.0949	0.03734			--	--	--	--
								--	--	3.1448	0.03735			--	--	--	--
								--	--	3.1961	0.03734			--	--	--	--
								--	--	3.174	0.03733			--	--	--	--
								--	--	3.1205	0.03733			--	--	--	--
								--	--	3.0324	0.03734			--	--	--	--
								--	--	2.9638	0.03736			--	--	--	--
								--	--	2.8804	0.03738			--	--	--	--
								--	--	2.7954	0.03742			--	--	--	--
								--	--	2.7114	0.03742			--	--	--	--
								--	--	2.6116	0.03743			--	--	--	--
								--	--	2.5226	0.03746			--	--	--	--
								--	--	2.4228	0.03746			--	--	--	--
								--	--	2.345	0.0375			--	--	--	--
								--	--	2.2832	0.0375			--	--	--	--
								--	--	2.2415	0.0375			--	--	--	--
								--	--	2.2089	0.03752			--	--	--	--
								--	--	2.1866	0.0375			--	--	--	--
								--	--	2.169	0.03746			--	--	--	--
								--	--	2.1566	0.03739			--	--	--	--
								--	--	2.1528	0.03735			--	--	--	--
								--	--	2.1413	0.03733			--	--	--	--
								--	--	2.1284	0.03731			--	--	--	--
								--	--	2.1139	0.0373			--	--	--	--
								--	--	2.1115	0.03731			--	--	--	--
								--	--	2.1068	0.03733			--	--	--	--
								--	--	2.1016	0.03736			--	--	--	--
								--	--	2.0971	0.03735			--	--	--	--
								--	--	2.1055	0.03733			--	--	--	--
								--	--	2.1089	0.03734			--	--	--	--
								--	--	2.1042	0.03733			--	--	--	--
								--	--	2.1076	0.03735			--	--	--	--
								--	--	2.1079	0.03735			--	--	--	--
								--	--	2.1103	0.03734			--	--	--	--
								--	--	2.1187	0.03732			--	--	--	--
								--	--	2.1409	0.03728			--	--	--	--
								--	--	2.1638	0.03726			--	--	--	--
								--	--	2.1846	0.03722			--	--	--	--
								--	--	2.2026	0.03722			--	--	--	--
								--	--	2.1901	0.03723			--	--	--	--
								--	--	2.171	0.03722			--	--	--	--
								--	--	2.1511	0.03724			--	--	--	--
								--	--	2.1184	0.03727			--	--	--	--
								--	--	2.0612	0.03728			--	--	--	--
								--	--	2.0751	0.0373			--	--	--	--
								--	--	2.0981	0.0373			--	--	--	--
								--	--	2.1273	0.0373			--	--	--	--
								--	--	2.1652	0.03731			--	--	--	--
								--	--	2.1998	0.03733			--	--	--	--
								--	--	2.2444	0.03731			--	--	--	--
								--	--	2.302	0.03728			--	--	--	--
								--	--	2.3385	0.03724			--	--	--	--
								--	--	2.3593	0.03722			--	--	--	--
								--	--	2.427	0.0372			--	--	--	--
								--	--	2.5162	0.03719			--	--	--	--
								--	--	2.6093	0.03716			--	--	--	--
								--	--	2.7197	0.03715			--	--	--	--
								--	--	2.8035	0.03713			--	--	--	--
								--	--	2.8832	0.03711			--	--	--	--
								--	--	2.921	0.03706			--	--	--	--
								--	--	2.9457	0.03709			--	--	--	--
								--	--	2.9417	0.03706			--	--	--	--
								--	--	2.9007	0.03706			--	--	--	--
								--	--	2.8711	0.03704			--	--	--	--
								--	--	2.8596	0.03703			--	--	--	--
								--	--	2.8891	0.03702			--	--	--	--
								--	--	2.9051	0.037			--	--	--	--
								--	--	2.936	0.03698			--	--	--	--
								--	--	3.006	0.03696			--	--	--	--
								--	--	2.9789	0.03695			--	--	--	--
								--	--	2.9329	0.03701			--	--	--	--
								--	--	2.8903	0.03701			--	--	--	--
								--	--	2.8587	0.03702			--	--	--	--
								--	--	2.7959	0.03698			--	--	--	--
								--	--	2.773	0.03697			--	--	--	--
								--	--	2.8156	0.03693			--	--	--	--
								--	--	2.9152	0.03687			--	--	--	--
								--	--	3.0237	0.03685			--	--	--	--
[truncated: 682 more rows]

## Sheet: fig3e
	300K	25K
P(GPa)	R(Ohm)	R(Ohm)
[truncated: 9 more rows]

## Sheet: fig3f
	300K	2K
[truncated: 20 more rows]
